# Supplementary material
Source: publisher figshare collection journal article supplement (https://acs.figshare.com/ndownloader/files/3823435)
Supplement: Supplementary file 1 [file 3823435]

# CIF file for compound 5a?

data_mgrav3052
_audit_creation_date              2014-01-02
_audit_creation_method
;
Olex2 1.2-beta
(compiled 2013.12.10 svn.r2850 for OlexSys, GUI svn.r4736)
;
_shelxl_version_number            2013-3
_publ_contact_author_address      ?
_publ_contact_author_email        ?
_publ_contact_author_name         ''
_publ_contact_author_phone        ?
_publ_section_references
;
Dolomanov, O.V., Bourhis, L.J., Gildea, R.J, Howard, J.A.K. & Puschmann, H.
 (2009), J. Appl. Cryst. 42, 339-341.


Palatinus, L. & Chapuis, G. (2007). J. Appl. Cryst., 40, 786-790;
Palatinus, L. & van der Lee, A. (2008). J. Appl. Cryst. 41, 975-984;
Palatinus, L., Prathapa, S. J. & van Smaalen, S. (2012). J. Appl. Cryst. 45,
 575-580
Sheldrick, G.M. (2008). Acta Cryst. A64, 112-122
;
_chemical_name_common             ?
_chemical_name_systematic
;
 ?
;
_chemical_formula_moiety          'C16 H16 Cl N3 O4'
_chemical_formula_sum             'C16 H16 Cl N3 O4'
_chemical_formula_weight          349.77
_chemical_melting_point           ?
loop_
  _atom_type_symbol
  _atom_type_description
  _atom_type_scat_dispersion_real
  _atom_type_scat_dispersion_imag
  _atom_type_scat_source
 'C' 'C' 0.0033 0.0016 'International Tables Vol C Tables 4.2.6.8 and 6.1.1.4'
 'H' 'H' 0.0000 0.0000 'International Tables Vol C Tables 4.2.6.8 and 6.1.1.4'
 'Cl' 'Cl' 0.1484 0.1585 'International Tables Vol C Tables 4.2.6.8 and 6.1.1.4'
 'N' 'N' 0.0061 0.0033 'International Tables Vol C Tables 4.2.6.8 and 6.1.1.4'
 'O' 'O' 0.0106 0.0060 'International Tables Vol C Tables 4.2.6.8 and 6.1.1.4'

_shelx_space_group_comment
;
The symmetry employed for this shelxl refinement is uniquely defined
by the following loop, which should always be used as a source of
symmetry information in preference to the above space-group names.
They are only intended as comments.
;
_space_group_crystal_system       'monoclinic'
_space_group_IT_number            14
_space_group_name_H-M_alt         'P 1 21/c 1'
_space_group_name_Hall            '-P 2ybc'
loop_
  _space_group_symop_operation_xyz
 'x, y, z'
 '-x, y+1/2, -z+1/2'
 '-x, -y, -z'
 'x, -y-1/2, z-1/2'

_cell_length_a                    8.720(3)
_cell_length_b                    23.945(8)
_cell_length_c                    8.704(3)
_cell_angle_alpha                 90
_cell_angle_beta                  112.823(5)
_cell_angle_gamma                 90
_cell_volume                      1675.1(9)
_cell_formula_units_Z             4
_cell_measurement_reflns_used     9975
_cell_measurement_temperature     252
_cell_measurement_theta_max       31.788
_cell_measurement_theta_min       2.534
_shelx_estimated_absorpt_T_max    ?
_shelx_estimated_absorpt_T_min    ?
_exptl_absorpt_coefficient_mu     0.253
_exptl_absorpt_correction_T_max   0.7463
_exptl_absorpt_correction_T_min   0.6661
_exptl_absorpt_correction_type    multi-scan
_exptl_absorpt_process_details
;
SADABS-2012/1 (Bruker,2012) was used for absorption correction.
wR2(int) was 0.0870 before and 0.0651 after correction.
The Ratio of minimum to maximum transmission is 0.8925.
The \l/2 correction factor is 0.0015.
;
_exptl_crystal_colour             colourless
_exptl_crystal_colour_primary     colourless
_exptl_crystal_density_diffrn     1.387
_exptl_crystal_density_meas       ?
_exptl_crystal_density_method     ?
_exptl_crystal_description        prism
_exptl_crystal_F_000              728
_exptl_crystal_recrystallization_method
;
'The material was recrystallised by vapour diffusion from a mixture of DCM, 
hexanes, EtOAc and a mixture of hexanes and EtOH.'
;
_exptl_crystal_size_max           0.526
_exptl_crystal_size_mid           0.515
_exptl_crystal_size_min           0.395
_exptl_special_details
;
 ?
;
_exptl_transmission_factor_max    ?
_exptl_transmission_factor_min    ?
_diffrn_reflns_av_R_equivalents   0.0404
_diffrn_reflns_av_unetI/netI      0.0355
_diffrn_reflns_Laue_measured_fraction_full 0.996
_diffrn_reflns_Laue_measured_fraction_max 0.997
_diffrn_reflns_limit_h_max        11
_diffrn_reflns_limit_h_min        -11
_diffrn_reflns_limit_k_max        31
_diffrn_reflns_limit_k_min        -30
_diffrn_reflns_limit_l_max        11
_diffrn_reflns_limit_l_min        -11
_diffrn_reflns_number             15965
_diffrn_reflns_point_group_measured_fraction_full 0.996
_diffrn_reflns_point_group_measured_fraction_max 0.997
_diffrn_reflns_theta_full         26.000
_diffrn_reflns_theta_max          27.483
_diffrn_reflns_theta_min          2.534
_diffrn_ambient_temperature       252
_diffrn_detector_area_resol_mean  512
_diffrn_measured_fraction_theta_full 0.996
_diffrn_measured_fraction_theta_max 0.997
_diffrn_measurement_device_type   'Bruker APEX-II CCD'
_diffrn_measurement_method        '\f and \w scans'
_diffrn_radiation_monochromator   graphite
_diffrn_radiation_type            MoK\a
_diffrn_radiation_wavelength      0.71073
_diffrn_source                    'fine-focus sealed tube'
_diffrn_special_details           ?
_diffrn_standards_number          0
_reflns_Friedel_coverage          0.000
_reflns_Friedel_fraction_full     .
_reflns_Friedel_fraction_max      .
_reflns_number_gt                 3185
_reflns_number_total              3836
_reflns_special_details
;
 Reflections were merged by SHELXL according to the crystal
 class for the calculation of statistics and refinement.
 
 _reflns_Friedel_fraction is defined as the number of unique
 Friedel pairs measured divided by the number that would be
 possible theoretically, ignoring centric projections and
 systematic absences.
;
_reflns_threshold_expression      'I > 2\s(I)'
_computing_cell_refinement        'SAINT v8.32B (Bruker, 2013)'
_computing_data_collection        ?
_computing_data_reduction         'SAINT v8.32B (Bruker, 2013)'
_computing_molecular_graphics     'Olex2 (Dolomanov et al., 2009)'
_computing_publication_material   'Olex2 (Dolomanov et al., 2009)'
_computing_structure_refinement   'ShelXL (Sheldrick, 2008)'
_computing_structure_solution
;
Superflip (Palatinus & Chapuis, 2007;Palatinus & van der Lee, 2008;
Palatinus et al., 2012)
;
_refine_diff_density_max          0.793
_refine_diff_density_min          -0.336
_refine_diff_density_rms          0.063
_refine_ls_extinction_coef        .
_refine_ls_extinction_method      none
_refine_ls_goodness_of_fit_ref    1.152
_refine_ls_hydrogen_treatment     mixed
_refine_ls_matrix_type            full
_refine_ls_number_parameters      219
_refine_ls_number_reflns          3836
_refine_ls_number_restraints      0
_refine_ls_R_factor_all           0.0868
_refine_ls_R_factor_gt            0.0780
_refine_ls_restrained_S_all       1.152
_refine_ls_shift/su_max           0.042
_refine_ls_shift/su_mean          0.005
_refine_ls_structure_factor_coef  Fsqd
_refine_ls_weighting_details
'w=1/[\s^2^(Fo^2^)+(0.0638P)^2^+2.4396P] where P=(Fo^2^+2Fc^2^)/3'
_refine_ls_weighting_scheme       calc
_refine_ls_wR_factor_gt           0.2064
_refine_ls_wR_factor_ref          0.2117
_refine_special_details
;
 ?
;
_olex2_refinement_description
;
1. Fixed Uiso
 At 1.2 times of:
  All C(H) groups, All C(H,H) groups
 At 1.5 times of:
  All C(H,H,H) groups
2.a Ternary CH refined with riding coordinates:
 C3(H3), C4(H4)
2.b Secondary CH2 refined with riding coordinates:
 C8(H8A,H8B), C7(H7A,H7B)
2.c Aromatic/amide H refined with riding coordinates:
 C10(H10), C9(H9), C12(H12), C11(H11)
2.d Idealised Me refined as rotating group:
 C14(H14A,H14B,H14C), C16(H16A,H16B,H16C)
;
_atom_sites_solution_hydrogens    geom
_atom_sites_solution_primary      iterative
_atom_sites_solution_secondary    ?
loop_
  _atom_site_label
  _atom_site_type_symbol
  _atom_site_fract_x
  _atom_site_fract_y
  _atom_site_fract_z
  _atom_site_U_iso_or_equiv
  _atom_site_adp_type
  _atom_site_occupancy
  _atom_site_site_symmetry_order
  _atom_site_calc_flag
  _atom_site_refinement_flags_posn
  _atom_site_refinement_flags_adp
  _atom_site_refinement_flags_occupancy
  _atom_site_disorder_assembly
  _atom_site_disorder_group
 Cl1 Cl 0.04154(13) 0.26969(5) 0.98815(16) 0.0722(4) Uani 1 1 d . . . . .
 O3 O -0.0936(3) 0.40227(13) 1.1962(3) 0.0618(7) Uani 1 1 d . . . . .
 O1 O -0.4129(3) 0.47061(11) 0.7064(3) 0.0551(6) Uani 1 1 d . . . . .
 O2 O -0.2839(3) 0.49327(10) 0.9770(3) 0.0537(6) Uani 1 1 d . . . . .
 O4 O 0.1733(3) 0.42243(12) 1.2575(3) 0.0597(7) Uani 1 1 d . . . . .
 N3 N -0.1233(4) 0.42784(12) 0.7032(3) 0.0521(7) Uani 1 1 d . . . . .
 N2 N 0.0152(4) 0.39972(13) 0.7377(3) 0.0533(7) Uani 1 1 d . . . . .
 N1 N 0.0830(3) 0.39097(11) 0.9020(3) 0.0414(6) Uani 1 1 d . . . . .
 C3 C 0.2341(4) 0.35657(13) 0.9724(4) 0.0413(7) Uani 1 1 d . . . . .
 H3 H 0.2744 0.3575 1.0968 0.050 Uiso 1 1 calc R . . . .
 C8 C 0.3723(5) 0.37804(16) 0.9217(7) 0.0671(11) Uani 1 1 d . . . . .
 H8A H 0.3418 0.3721 0.8009 0.081 Uiso 1 1 calc R . . . .
 H8B H 0.3891 0.4185 0.9450 0.081 Uiso 1 1 calc R . . . .
 C15 C 0.0351(4) 0.41344(13) 1.1593(4) 0.0400(6) Uani 1 1 d . . . . .
 C2 C -0.0125(4) 0.41410(12) 0.9769(4) 0.0359(6) Uani 1 1 d . . . . .
 C7 C 0.5282(6) 0.3470(2) 1.0190(8) 0.0852(16) Uani 1 1 d . . . . .
 H7A H 0.5704 0.3598 1.1363 0.102 Uiso 1 1 calc R . . . .
 H7B H 0.6134 0.3561 0.9739 0.102 Uiso 1 1 calc R . . . .
 C4 C 0.1951(4) 0.29649(13) 0.9145(4) 0.0425(7) Uani 1 1 d . . . . .
 H4 H 0.1443 0.2965 0.7899 0.051 Uiso 1 1 calc R . . . .
 C14 C -0.5512(5) 0.50638(19) 0.6923(6) 0.0668(11) Uani 1 1 d . . . . .
 H14A H -0.6414 0.5010 0.5829 0.100 Uiso 1 1 calc GR . . . .
 H14B H -0.5150 0.5455 0.7045 0.100 Uiso 1 1 calc GR . . . .
 H14C H -0.5911 0.4969 0.7800 0.100 Uiso 1 1 calc GR . . . .
 C5 C 0.3486(4) 0.26000(14) 0.9691(4) 0.0480(7) Uani 1 1 d . . . . .
 C1 C -0.1446(4) 0.43700(12) 0.8471(4) 0.0401(6) Uani 1 1 d . . . . .
 C10 C 0.4729(8) 0.1688(2) 1.0105(7) 0.0932(17) Uani 1 1 d . . . . .
 H10 H 0.4616 0.1294 1.0110 0.112 Uiso 1 1 calc R . . . .
 C9 C 0.3350(6) 0.20178(17) 0.9648(6) 0.0690(11) Uani 1 1 d . . . . .
 H9 H 0.2282 0.1850 0.9295 0.083 Uiso 1 1 calc R . . . .
 C13 C -0.2860(4) 0.47010(13) 0.8536(4) 0.0435(7) Uani 1 1 d . . . . .
 C16 C -0.0680(6) 0.4063(3) 1.3705(5) 0.0844(16) Uani 1 1 d . . . . .
 H16A H -0.1721 0.3976 1.3834 0.127 Uiso 1 1 calc GR . . . .
 H16B H -0.0330 0.4443 1.4104 0.127 Uiso 1 1 calc GR . . . .
 H16C H 0.0183 0.3798 1.4355 0.127 Uiso 1 1 calc GR . . . .
 C6 C 0.5047(5) 0.28372(19) 1.0148(6) 0.0646(11) Uani 1 1 d . . . . .
 C12 C 0.6442(6) 0.2496(3) 1.0595(8) 0.0936(17) Uani 1 1 d . . . . .
 H12 H 0.7515 0.2659 1.0929 0.112 Uiso 1 1 calc R . . . .
 C11 C 0.6285(8) 0.1923(3) 1.0559(8) 0.1009(19) Uani 1 1 d . . . . .
 H11 H 0.7241 0.1692 1.0845 0.121 Uiso 1 1 calc R . . . .

loop_
  _atom_site_aniso_label
  _atom_site_aniso_U_11
  _atom_site_aniso_U_22
  _atom_site_aniso_U_33
  _atom_site_aniso_U_23
  _atom_site_aniso_U_13
  _atom_site_aniso_U_12
 Cl1 0.0547(5) 0.0670(6) 0.0981(8) 0.0232(5) 0.0331(5) -0.0061(4)
 O3 0.0537(14) 0.103(2) 0.0363(12) 0.0088(12) 0.0254(11) -0.0010(14)
 O1 0.0543(14) 0.0610(15) 0.0444(13) 0.0018(11) 0.0130(11) 0.0128(11)
 O2 0.0641(16) 0.0602(15) 0.0415(13) -0.0041(10) 0.0257(12) 0.0116(11)
 O4 0.0525(14) 0.0808(18) 0.0388(12) -0.0043(12) 0.0102(11) -0.0076(13)
 N3 0.0694(19) 0.0532(16) 0.0349(13) 0.0046(12) 0.0216(13) 0.0133(14)
 N2 0.074(2) 0.0577(17) 0.0364(14) 0.0042(12) 0.0309(14) 0.0148(15)
 N1 0.0526(15) 0.0419(13) 0.0353(13) -0.0001(10) 0.0233(11) 0.0046(11)
 C3 0.0417(15) 0.0423(15) 0.0434(16) -0.0040(12) 0.0203(13) 0.0009(12)
 C8 0.071(3) 0.0425(19) 0.110(3) -0.005(2) 0.059(3) -0.0066(17)
 C15 0.0477(16) 0.0417(15) 0.0321(14) 0.0012(11) 0.0172(13) 0.0036(13)
 C2 0.0448(15) 0.0311(13) 0.0372(14) -0.0005(11) 0.0216(12) 0.0000(11)
 C7 0.057(2) 0.065(3) 0.146(5) -0.019(3) 0.052(3) -0.011(2)
 C4 0.0448(16) 0.0438(16) 0.0400(15) 0.0002(12) 0.0175(13) -0.0035(13)
 C14 0.062(2) 0.078(3) 0.059(2) 0.0160(19) 0.0215(19) 0.026(2)
 C5 0.0528(18) 0.0450(17) 0.0461(17) -0.0017(13) 0.0190(15) 0.0038(14)
 C1 0.0509(17) 0.0396(15) 0.0329(14) 0.0025(11) 0.0196(13) 0.0031(13)
 C10 0.128(5) 0.054(3) 0.099(4) 0.010(2) 0.046(4) 0.033(3)
 C9 0.080(3) 0.047(2) 0.074(3) 0.0026(18) 0.024(2) 0.0042(19)
 C13 0.0533(18) 0.0383(15) 0.0414(16) 0.0047(12) 0.0210(14) 0.0027(13)
 C16 0.078(3) 0.147(5) 0.040(2) 0.015(2) 0.036(2) 0.021(3)
 C6 0.054(2) 0.061(2) 0.086(3) -0.006(2) 0.034(2) 0.0072(17)
 C12 0.059(3) 0.098(4) 0.124(5) -0.008(3) 0.037(3) 0.024(3)
 C11 0.096(4) 0.097(4) 0.113(4) 0.013(3) 0.045(4) 0.054(4)

_geom_special_details
;
 All esds (except the esd in the dihedral angle between two l.s. planes)
 are estimated using the full covariance matrix.  The cell esds are taken
 into account individually in the estimation of esds in distances, angles
 and torsion angles; correlations between esds in cell parameters are only
 used when they are defined by crystal symmetry.  An approximate (isotropic)
 treatment of cell esds is used for estimating esds involving l.s. planes.
;
loop_
  _geom_bond_atom_site_label_1
  _geom_bond_atom_site_label_2
  _geom_bond_distance
  _geom_bond_site_symmetry_2
  _geom_bond_publ_flag
 Cl1 C4 1.811(3) . ?
 O3 C15 1.309(4) . ?
 O3 C16 1.448(4) . ?
 O1 C14 1.445(5) . ?
 O1 C13 1.329(4) . ?
 O2 C13 1.203(4) . ?
 O4 C15 1.196(4) . ?
 N3 N2 1.311(4) . ?
 N3 C1 1.354(4) . ?
 N2 N1 1.335(4) . ?
 N1 C3 1.471(4) . ?
 N1 C2 1.358(4) . ?
 C3 H3 1.0000 . ?
 C3 C8 1.525(5) . ?
 C3 C4 1.518(4) . ?
 C8 H8A 0.9900 . ?
 C8 H8B 0.9900 . ?
 C8 C7 1.491(7) . ?
 C15 C2 1.477(4) . ?
 C2 C1 1.376(4) . ?
 C7 H7A 0.9900 . ?
 C7 H7B 0.9900 . ?
 C7 C6 1.527(6) . ?
 C4 H4 1.0000 . ?
 C4 C5 1.513(5) . ?
 C14 H14A 0.9800 . ?
 C14 H14B 0.9800 . ?
 C14 H14C 0.9800 . ?
 C5 C9 1.398(5) . ?
 C5 C6 1.383(5) . ?
 C1 C13 1.484(4) . ?
 C10 H10 0.9500 . ?
 C10 C9 1.362(7) . ?
 C10 C11 1.377(9) . ?
 C9 H9 0.9500 . ?
 C16 H16A 0.9800 . ?
 C16 H16B 0.9800 . ?
 C16 H16C 0.9800 . ?
 C6 C12 1.390(6) . ?
 C12 H12 0.9500 . ?
 C12 C11 1.378(9) . ?
 C11 H11 0.9500 . ?

loop_
  _geom_angle_atom_site_label_1
  _geom_angle_atom_site_label_2
  _geom_angle_atom_site_label_3
  _geom_angle
  _geom_angle_site_symmetry_1
  _geom_angle_site_symmetry_3
  _geom_angle_publ_flag
 C15 O3 C16 116.4(3) . . ?
 C13 O1 C14 116.3(3) . . ?
 N2 N3 C1 108.4(3) . . ?
 N3 N2 N1 108.2(2) . . ?
 N2 N1 C3 119.2(2) . . ?
 N2 N1 C2 110.5(3) . . ?
 C2 N1 C3 130.1(3) . . ?
 N1 C3 H3 108.7 . . ?
 N1 C3 C8 111.8(3) . . ?
 N1 C3 C4 110.1(3) . . ?
 C8 C3 H3 108.7 . . ?
 C4 C3 H3 108.7 . . ?
 C4 C3 C8 108.9(3) . . ?
 C3 C8 H8A 110.0 . . ?
 C3 C8 H8B 110.0 . . ?
 H8A C8 H8B 108.4 . . ?
 C7 C8 C3 108.4(4) . . ?
 C7 C8 H8A 110.0 . . ?
 C7 C8 H8B 110.0 . . ?
 O3 C15 C2 110.9(3) . . ?
 O4 C15 O3 125.7(3) . . ?
 O4 C15 C2 123.4(3) . . ?
 N1 C2 C15 122.9(3) . . ?
 N1 C2 C1 104.0(2) . . ?
 C1 C2 C15 133.1(3) . . ?
 C8 C7 H7A 108.9 . . ?
 C8 C7 H7B 108.9 . . ?
 C8 C7 C6 113.4(4) . . ?
 H7A C7 H7B 107.7 . . ?
 C6 C7 H7A 108.9 . . ?
 C6 C7 H7B 108.9 . . ?
 Cl1 C4 H4 107.9 . . ?
 C3 C4 Cl1 108.6(2) . . ?
 C3 C4 H4 107.9 . . ?
 C5 C4 Cl1 111.7(2) . . ?
 C5 C4 C3 112.7(3) . . ?
 C5 C4 H4 107.9 . . ?
 O1 C14 H14A 109.5 . . ?
 O1 C14 H14B 109.5 . . ?
 O1 C14 H14C 109.5 . . ?
 H14A C14 H14B 109.5 . . ?
 H14A C14 H14C 109.5 . . ?
 H14B C14 H14C 109.5 . . ?
 C9 C5 C4 120.8(3) . . ?
 C6 C5 C4 120.4(3) . . ?
 C6 C5 C9 118.7(4) . . ?
 N3 C1 C2 108.8(3) . . ?
 N3 C1 C13 122.4(3) . . ?
 C2 C1 C13 128.7(3) . . ?
 C9 C10 H10 119.7 . . ?
 C9 C10 C11 120.5(5) . . ?
 C11 C10 H10 119.8 . . ?
 C5 C9 H9 119.5 . . ?
 C10 C9 C5 120.9(5) . . ?
 C10 C9 H9 119.5 . . ?
 O1 C13 C1 111.2(3) . . ?
 O2 C13 O1 125.1(3) . . ?
 O2 C13 C1 123.7(3) . . ?
 O3 C16 H16A 109.5 . . ?
 O3 C16 H16B 109.5 . . ?
 O3 C16 H16C 109.5 . . ?
 H16A C16 H16B 109.5 . . ?
 H16A C16 H16C 109.5 . . ?
 H16B C16 H16C 109.5 . . ?
 C5 C6 C7 121.5(3) . . ?
 C5 C6 C12 119.7(5) . . ?
 C12 C6 C7 118.8(4) . . ?
 C6 C12 H12 119.6 . . ?
 C11 C12 C6 120.7(5) . . ?
 C11 C12 H12 119.6 . . ?
 C10 C11 H11 120.3 . . ?
 C12 C11 C10 119.4(5) . . ?
 C12 C11 H11 120.3 . . ?

loop_
  _geom_torsion_atom_site_label_1
  _geom_torsion_atom_site_label_2
  _geom_torsion_atom_site_label_3
  _geom_torsion_atom_site_label_4
  _geom_torsion
  _geom_torsion_site_symmetry_1
  _geom_torsion_site_symmetry_2
  _geom_torsion_site_symmetry_3
  _geom_torsion_site_symmetry_4
  _geom_torsion_publ_flag
 Cl1 C4 C5 C9 41.3(4) . . . . ?
 Cl1 C4 C5 C6 -142.6(3) . . . . ?
 O3 C15 C2 N1 -138.1(3) . . . . ?
 O3 C15 C2 C1 44.7(5) . . . . ?
 O4 C15 C2 N1 42.4(5) . . . . ?
 O4 C15 C2 C1 -134.8(4) . . . . ?
 N3 N2 N1 C3 175.6(3) . . . . ?
 N3 N2 N1 C2 -0.4(4) . . . . ?
 N3 C1 C13 O1 23.5(4) . . . . ?
 N3 C1 C13 O2 -156.4(3) . . . . ?
 N2 N3 C1 C2 0.7(4) . . . . ?
 N2 N3 C1 C13 177.1(3) . . . . ?
 N2 N1 C3 C8 54.4(4) . . . . ?
 N2 N1 C3 C4 -66.8(4) . . . . ?
 N2 N1 C2 C15 -177.1(3) . . . . ?
 N2 N1 C2 C1 0.8(3) . . . . ?
 N1 C3 C8 C7 171.0(3) . . . . ?
 N1 C3 C4 Cl1 -61.2(3) . . . . ?
 N1 C3 C4 C5 174.5(3) . . . . ?
 N1 C2 C1 N3 -0.9(3) . . . . ?
 N1 C2 C1 C13 -177.0(3) . . . . ?
 C3 N1 C2 C15 7.6(5) . . . . ?
 C3 N1 C2 C1 -174.6(3) . . . . ?
 C3 C8 C7 C6 49.4(5) . . . . ?
 C3 C4 C5 C9 163.9(3) . . . . ?
 C3 C4 C5 C6 -19.9(5) . . . . ?
 C8 C3 C4 Cl1 176.0(3) . . . . ?
 C8 C3 C4 C5 51.6(4) . . . . ?
 C8 C7 C6 C5 -18.1(7) . . . . ?
 C8 C7 C6 C12 162.4(5) . . . . ?
 C15 C2 C1 N3 176.6(3) . . . . ?
 C15 C2 C1 C13 0.5(6) . . . . ?
 C2 N1 C3 C8 -130.6(4) . . . . ?
 C2 N1 C3 C4 108.2(3) . . . . ?
 C2 C1 C13 O1 -160.9(3) . . . . ?
 C2 C1 C13 O2 19.2(5) . . . . ?
 C7 C6 C12 C11 -179.4(5) . . . . ?
 C4 C3 C8 C7 -67.1(4) . . . . ?
 C4 C5 C9 C10 178.6(4) . . . . ?
 C4 C5 C6 C7 2.6(6) . . . . ?
 C4 C5 C6 C12 -177.9(4) . . . . ?
 C14 O1 C13 O2 6.3(5) . . . . ?
 C14 O1 C13 C1 -173.7(3) . . . . ?
 C5 C6 C12 C11 1.2(8) . . . . ?
 C1 N3 N2 N1 -0.2(4) . . . . ?
 C9 C5 C6 C7 178.8(4) . . . . ?
 C9 C5 C6 C12 -1.7(6) . . . . ?
 C9 C10 C11 C12 1.9(9) . . . . ?
 C16 O3 C15 O4 6.0(6) . . . . ?
 C16 O3 C15 C2 -173.5(3) . . . . ?
 C6 C5 C9 C10 2.4(7) . . . . ?
 C6 C12 C11 C10 -1.2(10) . . . . ?
 C11 C10 C9 C5 -2.5(8) . . . . ?

_shelx_res_file
;
TITL MGRAV3052 in P2(1)/c
CELL 0.71073 8.7203 23.9449 8.7037 90 112.8228 90
ZERR 4 0.0028 0.0075 0.0028 0 0.0046 0
LATT 1
SYMM -X,0.5+Y,0.5-Z
 
SFAC C H Cl N O
UNIT 64 64 4 12 16
 
L.S. 4 0 0
PLAN  20
TEMP -163
MORE -1
BOND $H
fmap 2 53
acta 52
CONF
SHEL 20 0.77
OMIT 1 1 1
OMIT -3 10 2
OMIT -4 1 1
OMIT -3 1 1
OMIT -5 10 4
OMIT -4 7 1
OMIT -6 4 2
OMIT -5 8 6
OMIT -1 2 6
OMIT -3 3 3
REM <HKL>Z:/CHE-XRAY-16P/C/C037/work/MGRAV3052.hkl</HKL>
 
WGHT    0.063800    2.439600
FVAR       0.15713
CL1   3    0.041536    0.269691    0.988152    11.00000    0.05467    0.06701 =
         0.09808    0.02316    0.03307   -0.00605
O3    5   -0.093584    0.402275    1.196205    11.00000    0.05373    0.10271 =
         0.03629    0.00883    0.02539   -0.00097
O1    5   -0.412891    0.470608    0.706403    11.00000    0.05432    0.06099 =
         0.04436    0.00180    0.01295    0.01277
O2    5   -0.283898    0.493265    0.976955    11.00000    0.06411    0.06016 =
         0.04149   -0.00407    0.02566    0.01158
O4    5    0.173290    0.422426    1.257450    11.00000    0.05249    0.08081 =
         0.03883   -0.00426    0.01017   -0.00760
N3    4   -0.123254    0.427839    0.703201    11.00000    0.06944    0.05318 =
         0.03491    0.00457    0.02157    0.01329
N2    4    0.015170    0.399724    0.737695    11.00000    0.07441    0.05767 =
         0.03643    0.00417    0.03094    0.01479
N1    4    0.082964    0.390974    0.901978    11.00000    0.05261    0.04188 =
         0.03530   -0.00006    0.02325    0.00457
C3    1    0.234077    0.356566    0.972432    11.00000    0.04171    0.04233 =
         0.04338   -0.00404    0.02027    0.00089
AFIX  13
H3    2    0.274367    0.357520    1.096760    11.00000   -1.20000
AFIX   0
C8    1    0.372313    0.378045    0.921713    11.00000    0.07063    0.04253 =
         0.10965   -0.00462    0.05852   -0.00662
AFIX  23
H8A   2    0.341760    0.372126    0.800859    11.00000   -1.20000
H8B   2    0.389132    0.418548    0.944995    11.00000   -1.20000
AFIX   0
C15   1    0.035088    0.413439    1.159263    11.00000    0.04772    0.04166 =
         0.03214    0.00122    0.01718    0.00361
C2    1   -0.012467    0.414104    0.976881    11.00000    0.04475    0.03108 =
         0.03720   -0.00048    0.02160   -0.00001
C7    1    0.528182    0.346996    1.018971    11.00000    0.05681    0.06506 =
         0.14584   -0.01878    0.05248   -0.01076
AFIX  23
H7A   2    0.570413    0.359775    1.136284    11.00000   -1.20000
H7B   2    0.613388    0.356124    0.973879    11.00000   -1.20000
AFIX   0
C4    1    0.195065    0.296494    0.914540    11.00000    0.04476    0.04377 =
         0.03996    0.00015    0.01754   -0.00348
AFIX  13
H4    2    0.144254    0.296543    0.789918    11.00000   -1.20000
AFIX   0
C14   1   -0.551213    0.506384    0.692345    11.00000    0.06175    0.07773 =
         0.05911    0.01603    0.02153    0.02602
AFIX 137
H14A  2   -0.641368    0.501030    0.582948    11.00000   -1.50000
H14B  2   -0.514999    0.545459    0.704513    11.00000   -1.50000
H14C  2   -0.591054    0.496920    0.780043    11.00000   -1.50000
AFIX   0
C5    1    0.348592    0.260005    0.969053    11.00000    0.05278    0.04503 =
         0.04612   -0.00167    0.01897    0.00384
C1    1   -0.144642    0.436999    0.847135    11.00000    0.05089    0.03958 =
         0.03288    0.00253    0.01963    0.00312
C10   1    0.472878    0.168830    1.010465    11.00000    0.12754    0.05403 =
         0.09947    0.00998    0.04577    0.03341
AFIX  43
H10   2    0.461596    0.129377    1.010986    11.00000   -1.20000
AFIX   0
C9    1    0.335023    0.201783    0.964772    11.00000    0.07992    0.04710 =
         0.07436    0.00264    0.02368    0.00420
AFIX  43
H9    2    0.228164    0.184982    0.929502    11.00000   -1.20000
AFIX   0
C13   1   -0.285972    0.470100    0.853551    11.00000    0.05326    0.03827 =
         0.04138    0.00472    0.02101    0.00267
C16   1   -0.068033    0.406316    1.370471    11.00000    0.07848    0.14684 =
         0.03978    0.01489    0.03607    0.02108
AFIX 137
H16A  2   -0.172138    0.397561    1.383448    11.00000   -1.50000
H16B  2   -0.032993    0.444335    1.410369    11.00000   -1.50000
H16C  2    0.018322    0.379786    1.435520    11.00000   -1.50000
AFIX   0
C6    1    0.504714    0.283721    1.014812    11.00000    0.05355    0.06104 =
         0.08570   -0.00554    0.03400    0.00720
C12   1    0.644212    0.249564    1.059514    11.00000    0.05926    0.09807 =
         0.12444   -0.00843    0.03654    0.02389
AFIX  43
H12   2    0.751538    0.265905    1.092903    11.00000   -1.20000
AFIX   0
C11   1    0.628500    0.192267    1.055918    11.00000    0.09637    0.09683 =
         0.11318    0.01292    0.04473    0.05391
AFIX  43
H11   2    0.724113    0.169152    1.084521    11.00000   -1.20000
AFIX   0
HKLF 4
 
REM  MGRAV3052 in P2(1)/c
REM R1 =  0.0780 for    3185 Fo > 4sig(Fo)  and  0.0868 for all    3836 data
REM    219 parameters refined using      0 restraints
 
END  
     
WGHT      0.0546      2.6636 

REM Highest difference peak  0.793,  deepest hole -0.336,  1-sigma level  0.063
Q1    1  -0.0553  0.2675  0.9957  11.00000  0.05    0.79
Q2    1   0.8051  0.2996  1.0800  11.00000  0.05    0.38
Q3    1   0.7744  0.3572  1.0372  11.00000  0.05    0.38
Q4    1   0.1447  0.4383  1.1543  11.00000  0.05    0.36
Q5    1  -0.0681  0.3833  1.1202  11.00000  0.05    0.36
Q6    1  -0.1808  0.4206  0.7574  11.00000  0.05    0.35
Q7    1  -0.4187  0.5335  0.7049  11.00000  0.05    0.33
Q8    1   0.0155  0.4171  1.0591  11.00000  0.05    0.30
Q9    1   0.0940  0.4018  0.8121  11.00000  0.05    0.29
Q10   1   0.6177  0.3794  1.0831  11.00000  0.05    0.29
Q11   1  -0.0651  0.4408  0.9394  11.00000  0.05    0.29
Q12   1   0.0235  0.2852  0.8927  11.00000  0.05    0.28
Q13   1   0.0036  0.3983  1.2714  11.00000  0.05    0.26
Q14   1  -0.2900  0.5355  0.8365  11.00000  0.05    0.26
Q15   1   0.2794  0.2793  0.9272  11.00000  0.05    0.26
Q16   1  -0.0372  0.4193  0.8383  11.00000  0.05    0.25
Q17   1   0.3404  0.2398  0.9346  11.00000  0.05    0.24
Q18   1   0.1025  0.4409  1.2623  11.00000  0.05    0.22
Q19   1   0.0425  0.4012  0.9587  11.00000  0.05    0.22
Q20   1   0.1365  0.3934  1.2352  11.00000  0.05    0.21

REM The information below was added by Olex2.
REM
REM R1 = 0.0780 for 3185 Fo > 4sig(Fo) and 0.0868 for all 19943 data
REM n/a parameters refined using n/a restraints
REM Highest difference peak 0.79, deepest hole -0.34
REM Mean Shift 0.005, Max Shift 0.002.

REM +++ Tabular Listing of Refinement Information +++
REM R1_all = 0.0868
REM R1_gt = 0.0780
REM wR_ref = 0.2117
REM GOOF = 1.152
REM Shift_max = 0.002
REM Shift_mean = 0.005
REM Reflections_all = 19943
REM Reflections_gt = 3185
REM Parameters = n/a
REM Hole = -0.34
REM Peak = 0.79
REM Flack = n/a

;
loop_
  _refln_index_h
  _refln_index_k
  _refln_index_l
  _refln_F_squared_meas
  _refln_F_squared_sigma
 0 0 1 -0.33 0.01
 0 0 1 -0.33 0.01
 0 0 1 -0.35 0.01
 0 0 2 292.47 16.06
 0 0 2 280.93 16.51
 0 0 2 270.36 16.83
 0 0 3 -0.02 0.01
 0 0 -3 0.06 0.03
 0 0 3 0 0.01
 0 0 4 170.26 9.53
 0 0 4 165.39 9.82
 0 0 -4 166.05 9.99
 0 0 -5 0.11 0.05
 0 0 5 0.02 0.02
 0 0 5 0.01 0.01
 0 0 -6 10.89 0.7
 0 0 6 11.57 0.67
 0 0 -7 0.25 0.08
 0 0 7 0.11 0.06
 0 0 -8 0.99 0.13
 0 0 8 0.87 0.11
 0 0 9 -0.02 0.03
 0 0 -9 0 0.04
 0 0 10 0.03 0.03
 0 0 -10 0 0.05
 0 0 -11 -0.01 0.06
 0 0 11 -0.04 0.04
 0 1 1 257.2 14.62
 0 1 1 250.25 14.2
 0 -1 1 234.64 14.89
 0 -1 1 249.75 14.21
 0 1 2 22.41 1.33
 0 1 2 23.86 1.36
 0 -1 2 23.04 1.33
 0 -1 2 22.95 1.39
 0 -1 -2 23.92 1.39
 0 -1 2 22.88 1.36
 0 1 3 45.48 2.36
 0 1 3 43.98 2.43
 0 -1 3 35.56 2.36
 0 -1 3 35.1 2.42
 0 -1 -3 46.47 2.48
 0 1 4 45.09 2.62
 0 1 4 46.03 2.69
 0 -1 4 45.87 2.62
 0 -1 -4 44.92 2.75
 0 -1 4 46.69 2.68
 0 1 5 1.57 0.12
 0 1 5 1.59 0.11
 0 -1 -5 1.6 0.13
 0 1 6 0.12 0.03
 0 1 -6 0.18 0.06
 0 1 6 0.21 0.06
 0 -1 -6 0.21 0.06
 0 -1 6 0.16 0.06
 0 1 -7 11.46 0.71
 0 1 7 10.82 0.67
 0 -1 -7 11.14 0.71
 0 -1 7 11.04 0.67
 0 1 8 1.24 0.13
 0 1 -8 1.22 0.14
 0 -1 -8 1.29 0.14
 0 -1 8 1.23 0.13
 0 1 9 2.05 0.18
 0 1 -9 2.14 0.2
 0 -1 9 1.99 0.18
 0 -1 -9 2.16 0.2
 0 1 -10 0.47 0.13
 0 1 10 0.31 0.11
 0 -1 10 0.44 0.11
 0 -1 -10 0.7 0.13
 0 1 11 0.29 0.12
 0 1 -11 0.24 0.13
 0 -1 11 0.29 0.12
 0 -1 -11 0.27 0.15
 0 2 1 14.63 0.86
 0 2 1 15.18 0.88
 0 -2 -1 14.43 0.9
 0 -2 1 15.05 0.9
 0 -2 1 14.72 0.86
 0 2 2 820.84 51.28
 0 -2 -2 903.47 51.27
 0 -2 2 845.06 53.3
 0 2 3 28.31 1.7
 0 2 3 29.79 1.74
 0 -2 -3 29.96 1.78
 0 -2 3 29.7 1.7
 0 -2 3 30.14 1.78
 0 2 4 18.05 1.05
 0 2 4 16.73 1.03
 0 -2 -4 18.64 1.08
 0 2 5 10.2 0.63
 0 2 5 10.95 0.63
 0 -2 -5 10.11 0.65
 0 -2 5 10.49 0.63
 0 -2 5 10.82 0.62
 0 2 6 1.18 0.1
 0 2 -6 0.97 0.11
 0 2 6 0.99 0.08
 0 2 -7 0.32 0.08
 0 -2 7 0.1 0.06
 0 -2 -7 0.38 0.09
 0 2 -8 0.22 0.1
 0 2 8 0.2 0.07
 0 -2 8 0.12 0.07
 0 -2 -8 0.14 0.09
 0 2 9 0 0.03
 0 2 -9 0.13 0.1
 0 -2 -9 0.02 0.04
 0 -2 9 0.1 0.08
 0 2 -10 0.05 0.05
 0 2 10 0.03 0.04
 0 -2 10 0.06 0.04
 0 -2 -10 0.07 0.05
 0 2 -11 0.48 0.14
 0 2 11 0.27 0.12
 0 -2 11 0.38 0.12
 0 -2 -11 0.55 0.14
 0 3 0 -0.38 0.01
 0 -3 0 -0.34 0.01
 0 3 1 26.58 1.6
 0 3 -1 27.15 1.6
 0 -3 1 28.37 1.56
 0 -3 1 27.79 1.63
 0 -3 -1 25.91 1.63
 0 -3 -1 27.37 1.56
 0 3 2 12.34 0.74
 0 3 2 13.18 0.76
 0 -3 -2 12.52 0.78
 0 -3 2 13.22 0.78
 0 -3 2 12.96 0.74
 0 3 3 9.87 0.57
 0 3 3 9.8 0.56
 0 -3 3 8.05 0.56
 0 -3 -3 10.36 0.58
 0 3 -4 40.89 2.45
 0 3 4 40.4 2.34
 0 3 4 40.89 2.4
 0 -3 4 40.67 2.34
 0 -3 -4 40.9 2.45
 0 3 5 2.51 0.18
 0 3 5 2.62 0.17
 0 -3 -5 2.65 0.19
 0 3 6 20.2 1.16
 0 3 -6 18.52 1.2
 0 3 6 18.66 1.14
 0 -3 -6 19.8 1.2
 0 -3 6 20.15 1.14
 0 3 -7 5.55 0.4
 0 3 7 6.16 0.38
 0 -3 -7 6.38 0.4
 0 -3 7 5.59 0.38
 0 3 -8 0.94 0.12
 0 3 8 0.8 0.1
 0 -3 8 0.85 0.11
 0 -3 -8 0.94 0.12
 0 3 9 0.34 0.09
 0 3 -9 0.4 0.12
 0 -3 9 0.4 0.09
 0 -3 -9 0.43 0.11
 0 3 -10 0.47 0.13
 0 3 10 0.49 0.12
 0 -3 -10 0.54 0.14
 0 -3 10 0.25 0.11
 0 3 11 0.51 0.13
 0 3 -11 0.67 0.15
 0 -3 -11 0.49 0.15
 0 -3 11 0.66 0.13
 0 4 0 6.44 0.39
 0 -4 0 6.38 0.37
 0 4 -1 0.08 0.02
 0 -4 -1 0.08 0.02
 0 -4 1 0.07 0.02
 0 -4 1 0.04 0.02
 0 -4 -1 0.08 0.02
 0 4 2 114.43 6.36
 0 4 2 116.93 6.57
 0 -4 2 110.18 6.36
 0 -4 -2 112.61 6.67
 0 -4 2 104.09 6.67
 0 4 3 0.73 0.06
 0 4 3 0.7 0.06
 0 -4 3 0.66 0.06
 0 -4 3 0.66 0.06
 0 -4 -3 0.76 0.06
 0 4 4 30.19 1.74
 0 4 4 29.27 1.78
 0 -4 -4 31.26 1.82
 0 4 5 0.61 0.05
 0 4 5 0.5 0.07
 0 4 -5 0.58 0.07
 0 -4 -5 0.61 0.07
 0 -4 5 0.56 0.07
 0 4 6 9.5 0.64
 0 4 -6 12.36 0.68
 0 4 6 10.69 0.65
 0 -4 -6 10.73 0.68
 0 4 -7 1.28 0.13
 0 4 7 1.12 0.12
 0 -4 7 1.38 0.13
 0 -4 -7 1.44 0.13
 0 4 8 0.36 0.08
 0 4 -8 0.4 0.1
 0 -4 8 0.39 0.09
 0 -4 -8 0.36 0.1
 0 4 -9 0.01 0.05
 0 4 9 0.03 0.03
 0 -4 9 0.02 0.03
 0 -4 -9 0.05 0.04
 0 4 -10 0.06 0.05
 0 4 10 0.06 0.04
 0 -4 10 0 0.03
 0 -4 -10 0.17 0.12
 0 4 11 0.36 0.13
 0 4 -11 0.51 0.14
 0 -4 11 0.39 0.12
 0 -4 -11 0.3 0.15
 0 5 0 -0.09 0.02
 0 -5 0 -0.1 0.01
 0 -5 0 -0.06 0.02
 0 5 1 1.49 0.12
 0 -5 1 1.95 0.12
 0 -5 1 1.98 0.11
 0 5 -2 1.49 0.09
 0 5 2 1.58 0.1
 0 5 2 1.53 0.1
 0 -5 -2 1.57 0.1
 0 -5 2 1.61 0.11
 0 -5 2 1.56 0.1
 0 -5 -2 1.64 0.1
 0 5 3 38.92 2.27
 0 5 3 39.06 2.34
 0 -5 3 42.1 2.27
 0 -5 -3 38.43 2.38
 0 -5 3 39.76 2.38
 0 5 -4 5.34 0.34
 0 5 4 5.1 0.33
 0 5 4 5.21 0.32
 0 -5 -4 5.46 0.34
 0 -5 4 5.33 0.32
 0 5 5 0.61 0.06
 0 5 5 0.53 0.07
 0 -5 5 0.97 0.08
 0 -5 -5 0.73 0.08
 0 5 -6 0.97 0.11
 0 5 6 1.07 0.1
 0 5 6 1.06 0.09
 0 -5 6 1.01 0.1
 0 -5 -6 1.11 0.11
 0 5 7 2.29 0.16
 0 5 -7 1.54 0.16
 0 -5 -7 2.17 0.17
 0 -5 7 1.62 0.15
 0 5 8 3.68 0.26
 0 5 -8 3.49 0.27
 0 -5 8 3.57 0.26
 0 -5 -8 3.65 0.27
 0 5 -9 1.52 0.18
 0 5 9 1.61 0.16
 0 -5 -9 1.43 0.17
 0 -5 9 1.41 0.15
 0 5 10 0.22 0.11
 0 5 -10 0.22 0.13
 0 -5 10 0.08 0.04
 0 -5 -10 0.08 0.06
 0 5 -11 0.64 0.16
 0 5 11 0.4 0.13
 0 -5 11 0.54 0.12
 0 -5 -11 0.69 0.15
 0 -5 -11 0.73 0.16
 0 6 0 304.01 17.3
 0 -6 0 283.42 17.57
 0 -6 0 296.13 16.79
 0 6 -1 37.29 2.15
 0 6 1 37.26 2.15
 0 -6 -1 35.31 2.18
 0 -6 1 36.42 2.19
 0 -6 -1 36.68 2.09
 0 -6 1 36.29 2.09
 0 6 2 41.97 2.46
 0 6 -2 40.87 2.46
 0 -6 -2 43.07 2.39
 0 -6 2 41.77 2.51
 0 -6 2 42.8 2.39
 0 -6 -2 40.51 2.5
 0 6 3 0.41 0.04
 0 6 3 0.3 0.04
 0 -6 3 0.45 0.05
 0 -6 -3 0.36 0.05
 0 -6 -3 0.33 0.04
 0 -6 3 0.32 0.04
 0 6 4 3.28 0.21
 0 6 4 3.15 0.21
 0 -6 -4 3.49 0.22
 0 6 -5 8.92 0.59
 0 6 5 9.52 0.57
 0 6 5 8.96 0.56
 0 -6 5 9.57 0.56
 0 -6 -5 9.66 0.58
 0 6 -6 0.19 0.07
 0 6 6 0.17 0.04
 0 6 6 0.1 0.06
 0 -6 -6 0.2 0.07
 0 -6 6 0.2 0.06
 0 6 7 1.97 0.16
 0 6 7 1.92 0.14
 0 6 -7 1.84 0.17
 0 -6 -7 1.87 0.17
 0 -6 7 1.94 0.16
 0 6 8 0.8 0.12
 0 6 -8 1.14 0.14
 0 -6 -8 0.95 0.12
 0 -6 8 1 0.12
 0 6 9 0.28 0.1
 0 6 -9 0.29 0.11
 0 -6 -9 0.15 0.11
 0 -6 9 0.26 0.09
 0 6 10 0.1 0.05
 0 6 -10 0.18 0.12
 0 -6 -10 0.06 0.06
 0 -6 10 0.33 0.11
 0 -6 -10 0.41 0.13
 0 6 11 -0.01 0.04
 0 6 -11 0.02 0.05
 0 -6 -11 0.04 0.06
 0 -6 -11 -0.03 0.05
 0 -6 11 0.04 0.04
 0 7 0 -0.02 0
 0 -7 0 -0.01 0.01
 0 -7 0 -0.01 0
 0 7 -1 13.77 0.76
 0 7 1 10.65 0.76
 0 -7 1 13.64 0.77
 0 -7 1 13.28 0.74
 0 7 2 1.69 0.11
 0 7 -2 1.56 0.1
 0 -7 2 1.64 0.11
 0 -7 -2 1.66 0.11
 0 -7 -2 1.57 0.11
 0 -7 2 1.57 0.11
 0 7 3 0.53 0.06
 0 -7 -3 0.59 0.06
 0 -7 -3 0.5 0.05
 0 -7 3 0.73 0.06
 0 -7 3 0.78 0.06
 0 7 -4 25.76 1.59
 0 7 4 25.43 1.51
 0 7 4 26.04 1.55
 0 -7 -4 26.86 1.58
 0 -7 4 26.94 1.52
 0 -7 -4 26.27 1.52
 0 7 5 4.6 0.3
 0 7 5 4.48 0.3
 0 -7 -5 5.01 0.31
 0 7 6 0.57 0.08
 0 7 6 0.88 0.08
 0 7 -6 0.67 0.09
 0 -7 -6 0.65 0.09
 0 -7 6 0.66 0.08
 0 7 7 2.01 0.15
 0 7 -7 2.32 0.18
 0 7 7 1.77 0.16
 0 -7 7 2.34 0.17
 0 -7 -7 1.76 0.16
 0 7 -8 0.08 0.04
 0 7 8 0 0.03
 0 -7 -8 0.2 0.08
 0 -7 8 0.02 0.03
 0 7 9 0.59 0.12
 0 7 -9 0.66 0.13
 0 -7 -9 0.56 0.12
 0 -7 -9 0.66 0.13
 0 -7 9 0.55 0.11
 0 7 -10 0.37 0.13
 0 7 10 0.78 0.14
 0 -7 10 0.46 0.12
 0 -7 -10 0.55 0.15
 0 -7 -10 0.42 0.13
 0 7 -11 0.28 0.13
 0 7 11 0.48 0.13
 0 -7 -11 0.21 0.13
 0 -7 11 0.38 0.12
 0 -7 -11 0.63 0.15
 0 8 0 43.19 2.46
 0 -8 0 40.3 2.5
 0 -8 0 42.09 2.39
 0 8 1 29.25 1.7
 0 8 -1 28.95 1.7
 0 -8 1 28.89 1.65
 0 -8 -1 27.83 1.72
 0 -8 -1 28.64 1.65
 0 -8 1 29.4 1.73
 0 8 2 74.89 4.38
 0 8 -2 72.89 4.37
 0 -8 -2 73.54 4.25
 0 -8 -2 72.94 4.45
 0 -8 2 77.13 4.46
 0 -8 2 75.88 4.25
 0 8 -3 8.49 0.51
 0 8 3 8.62 0.52
 0 -8 -3 8.34 0.53
 0 -8 3 8.49 0.53
 0 -8 -3 9.03 0.51
 0 -8 3 8.92 0.51
 0 8 4 4.77 0.31
 0 8 4 4.91 0.31
 0 -8 -4 5.19 0.32
 0 -8 -4 5.08 0.31
 0 8 5 8.13 0.49
 0 8 5 7.52 0.48
 0 8 -5 7.89 0.5
 0 -8 -5 7.84 0.48
 0 -8 -5 8.06 0.5
 0 -8 5 7.81 0.48
 0 8 6 0.76 0.07
 0 8 -6 0.47 0.08
 0 8 6 0.48 0.08
 0 -8 -6 0.59 0.09
 0 -8 -6 0.71 0.08
 0 -8 6 0.38 0.08
 0 8 7 2.06 0.15
 0 8 7 1.78 0.16
 0 8 -7 1.88 0.17
 0 -8 -7 1.75 0.16
 0 -8 7 2.19 0.16
 0 -8 -7 1.92 0.16
 0 8 -8 0.06 0.04
 0 8 8 0.21 0.08
 0 -8 -8 0.12 0.09
 0 -8 8 0.11 0.08
 0 -8 -8 0.33 0.09
 0 8 -9 0.3 0.12
 0 8 9 0.3 0.1
 0 -8 -9 0.39 0.11
 0 -8 -9 0.39 0.12
 0 -8 9 0.3 0.09
 0 8 -10 0.48 0.14
 0 8 10 0.27 0.11
 0 -8 10 0.45 0.11
 0 -8 -10 0.4 0.13
 0 -8 -10 0.37 0.13
 0 8 -11 0.02 0.06
 0 -8 -11 0.06 0.06
 0 -8 -11 -0.02 0.06
 0 -8 11 0.02 0.04
 0 9 0 0 0.01
 0 -9 0 0 0
 0 -9 0 0 0.01
 0 9 -1 202.37 12.52
 0 9 1 223.26 12.54
 0 -9 -1 210.98 12.72
 0 -9 1 205.55 12.16
 0 -9 1 207.3 12.74
 0 -9 -1 229.41 12.16
 0 9 -2 2.55 0.16
 0 9 2 2.63 0.17
 0 -9 2 2.35 0.16
 0 -9 -2 2.38 0.16
 0 -9 -2 2.53 0.16
 0 -9 2 2.65 0.16
 0 9 -3 55.38 3.26
 0 9 3 52.89 3.27
 0 -9 -3 52.52 3.32
 0 -9 3 59.24 3.18
 0 -9 3 58.5 3.33
 0 -9 -3 54.66 3.18
 0 9 -4 1.68 0.13
 0 9 4 1.74 0.13
 0 -9 4 1.92 0.13
 0 -9 -4 1.79 0.13
 0 -9 -4 1.69 0.13
 0 9 -5 7.08 0.45
 0 9 5 6.67 0.43
 0 -9 5 7.87 0.43
 0 -9 -5 6.55 0.44
 0 -9 -5 6.44 0.43
 0 9 -6 1.93 0.16
 0 9 6 1.92 0.15
 0 9 6 2.02 0.15
 0 -9 6 1.89 0.15
 0 -9 -6 2.18 0.16
 0 -9 -6 2.03 0.16
 0 9 7 0 0.02
 0 9 -7 0.1 0.08
 0 -9 -7 0.14 0.07
 0 -9 7 0.01 0.03
 0 -9 -7 -0.01 0.03
 0 9 8 1.7 0.16
 0 9 -8 1.78 0.18
 0 -9 -8 1.77 0.17
 0 -9 8 1.76 0.16
 0 -9 -8 1.86 0.17
 0 9 9 1.24 0.14
 0 9 -9 0.89 0.15
 0 -9 9 0.95 0.13
 0 -9 -9 1.29 0.15
 0 -9 -9 1.31 0.15
 0 9 -10 0.01 0.05
 0 -9 -10 0.06 0.05
 0 -9 10 0.03 0.04
 0 -9 -10 -0.01 0.04
 0 9 -11 0.73 0.16
 0 -9 -11 0.8 0.15
 0 -9 -11 0.88 0.18
 0 -9 11 0.87 0.14
 0 10 0 81.67 4.71
 0 -10 0 79.86 4.57
 0 -10 0 78.9 4.78
 0 10 1 37.12 2.19
 0 10 -1 37.52 2.18
 0 -10 -1 36.95 2.12
 0 -10 1 36.45 2.22
 0 -10 1 37.25 2.12
 0 10 -2 15.16 0.83
 0 10 2 12.04 0.84
 0 -10 2 15.5 0.85
 0 -10 -2 11.64 0.81
 0 -10 2 15.48 0.81
 0 10 -3 0.89 0.06
 0 10 3 0.99 0.08
 0 -10 3 0.93 0.08
 0 -10 -3 0.95 0.08
 0 -10 -3 0.85 0.07
 0 -10 3 0.96 0.08
 0 10 4 0.1 0.04
 0 10 -4 0.34 0.05
 0 -10 -4 0.12 0.05
 0 -10 4 0.35 0.05
 0 -10 -4 0.13 0.04
 0 10 -5 1.54 0.13
 0 10 5 1.66 0.12
 0 -10 5 1.64 0.13
 0 -10 -5 1.55 0.13
 0 -10 -5 1.65 0.13
 0 10 -6 2.33 0.19
 0 10 6 2.58 0.18
 0 -10 -6 2.48 0.19
 0 -10 -6 2.46 0.18
 0 -10 6 2.37 0.18
 0 10 7 0.59 0.08
 0 10 -7 0.56 0.1
 0 -10 7 0.44 0.09
 0 -10 -7 0.52 0.09
 0 -10 -7 0.48 0.09
 0 10 -8 0.21 0.1
 0 -10 8 -0.01 0.03
 0 -10 -8 0.03 0.03
 0 -10 -8 -0.02 0.03
 0 10 -9 0.34 0.13
 0 -10 -9 0.39 0.11
 0 -10 -9 0.34 0.12
 0 -10 9 0.4 0.11
 0 10 -10 0.21 0.13
 0 -10 10 0.4 0.12
 0 -10 -10 0.33 0.13
 0 -10 -10 0.17 0.12
 0 11 1 78.45 4.94
 0 11 -1 87.52 4.94
 0 -11 1 89.59 4.8
 0 -11 -1 77.4 4.79
 0 -11 1 87.16 5.02
 0 11 -2 14.71 0.89
 0 11 2 15.25 0.9
 0 -11 -2 14.66 0.9
 0 -11 2 15.4 0.87
 0 -11 2 14.89 0.91
 0 -11 -2 15.3 0.87
 0 11 3 17.05 1.09
 0 11 -3 19.13 1.08
 0 -11 3 19.26 1.11
 0 -11 -3 17.03 1.1
 0 -11 -3 17.58 1.06
 0 -11 3 19.67 1.06
 0 11 -4 5.01 0.3
 0 11 4 4.86 0.32
 0 11 -4 4.72 0.32
 0 -11 -4 5.28 0.32
 0 -11 -4 4.91 0.31
 0 -11 4 5.1 0.31
 0 11 5 1.58 0.12
 0 -11 -5 1.48 0.13
 0 -11 -5 1.56 0.12
 0 11 6 1.94 0.15
 0 11 -6 1.88 0.17
 0 -11 -6 2 0.15
 0 -11 6 2.06 0.16
 0 -11 -6 1.97 0.16
 0 11 -7 1.13 0.14
 0 11 7 1.36 0.12
 0 -11 -7 1.56 0.13
 0 -11 -7 1.69 0.15
 0 -11 7 1.02 0.12
 0 11 -8 0.88 0.13
 0 -11 -8 0.88 0.11
 0 -11 8 0.88 0.11
 0 -11 -8 0.95 0.13
 0 11 -9 0.16 0.11
 0 -11 -9 0.1 0.05
 0 -11 -9 0.14 0.11
 0 -11 9 0.24 0.09
 0 11 -10 0.68 0.15
 0 -11 -10 0.37 0.13
 0 -11 10 0.25 0.11
 0 -11 -10 0.46 0.13
 0 12 0 44.01 2.56
 0 -12 0 44.19 2.48
 0 -12 0 41.95 2.59
 0 12 -1 1.69 0.12
 0 12 1 1.92 0.13
 0 -12 1 1.61 0.12
 0 -12 1 1.55 0.11
 0 -12 -1 1.74 0.12
 0 12 2 0.41 0.06
 0 12 -2 0.54 0.05
 0 -12 -2 0.41 0.05
 0 -12 -2 0.47 0.04
 0 -12 2 0.38 0.05
 0 -12 2 0.43 0.04
 0 12 3 0.07 0.04
 0 12 -3 0.11 0.03
 0 -12 -3 0.07 0.04
 0 -12 -3 0.06 0.03
 0 -12 3 0.12 0.04
 0 -12 3 0.09 0.04
 0 12 -4 15.67 1.06
 0 12 4 17.84 1.04
 0 12 -4 16.18 1.02
 0 -12 4 16.27 1.01
 0 -12 -4 19.08 1.02
 0 -12 -4 18.88 1.05
 0 12 -5 1.83 0.15
 0 12 5 1.75 0.14
 0 -12 5 1.71 0.14
 0 -12 -5 1.85 0.14
 0 -12 -5 1.83 0.15
 0 12 -6 3.93 0.24
 0 12 6 2.85 0.22
 0 -12 -6 2.82 0.23
 0 -12 -6 2.85 0.22
 0 -12 6 3.86 0.23
 0 12 7 6.18 0.4
 0 12 -7 5.99 0.42
 0 -12 7 6.15 0.4
 0 -12 -7 6.23 0.4
 0 -12 -7 6.09 0.4
 0 12 -8 0.42 0.11
 0 -12 -8 0.23 0.08
 0 -12 8 0.31 0.1
 0 -12 -8 0.34 0.11
 0 12 -9 0.04 0.05
 0 -12 -9 0.01 0.04
 0 -12 9 0.16 0.09
 0 -12 -9 -0.02 0.04
 0 12 -10 0.21 0.13
 0 -12 -10 0.18 0.13
 0 -12 10 0.02 0.04
 0 -13 0 -0.01 0.01
 0 13 1 79.38 4.82
 0 13 -1 85.28 4.81
 0 -13 1 80.13 4.89
 0 -13 -1 77.92 4.67
 0 -13 1 86.62 4.68
 0 13 2 4.54 0.29
 0 13 -2 4.32 0.28
 0 -13 -2 4.28 0.27
 0 -13 -2 4.51 0.28
 0 -13 2 4.71 0.28
 0 -13 2 4.4 0.28
 0 13 -3 71.38 4.23
 0 13 3 66.68 4.16
 0 13 -3 70.12 4.15
 0 -13 -3 71.62 4.04
 0 -13 -3 70.52 4.22
 0 -13 3 73.31 4.04
 0 13 4 3.01 0.22
 0 13 -4 3.3 0.23
 0 13 -4 3.19 0.2
 0 -13 -4 3.33 0.22
 0 -13 4 3.47 0.22
 0 -13 -4 3.22 0.21
 0 13 5 20.13 1.2
 0 13 -5 18.61 1.22
 0 -13 -5 20.51 1.17
 0 -13 -5 20.72 1.21
 0 -13 5 19.31 1.16
 0 13 6 0.48 0.08
 0 13 -6 0.34 0.09
 0 -13 6 0.42 0.08
 0 -13 -6 0.35 0.07
 0 -13 -6 0.46 0.09
 0 13 -7 4.33 0.31
 0 13 7 3.88 0.29
 0 -13 -7 4.03 0.29
 0 -13 7 4.68 0.3
 0 -13 -7 4.19 0.3
 0 13 -8 0.36 0.11
 0 13 8 0.27 0.08
 0 -13 -8 0.18 0.08
 0 -13 -8 0.33 0.1
 0 -13 8 0.19 0.09
 0 13 -9 0.27 0.12
 0 -13 9 0.17 0.1
 0 -13 -9 0.18 0.11
 0 13 -10 0.68 0.14
 0 -13 10 0.48 0.12
 0 -13 -10 0.68 0.15
 0 14 0 6.7 0.42
 0 -14 0 6.96 0.41
 0 14 -1 6.24 0.38
 0 14 1 6.17 0.39
 0 -14 -1 5.94 0.37
 0 -14 1 6.21 0.37
 0 14 2 6.79 0.47
 0 14 -2 8.22 0.47
 0 -14 2 8.76 0.46
 0 -14 -2 6.93 0.46
 0 14 -3 0.1 0.05
 0 -14 3 0.11 0.05
 0 -14 -3 0.09 0.05
 0 -14 -3 0.07 0.03
 0 14 4 8.84 0.55
 0 14 -4 8.08 0.55
 0 -14 -4 9.46 0.55
 0 -14 -4 9.44 0.54
 0 -14 4 8.42 0.53
 0 14 5 5.78 0.38
 0 14 -5 5.91 0.39
 0 -14 -5 5.82 0.37
 0 -14 5 6.02 0.37
 0 -14 -5 5.85 0.37
 0 14 6 2.29 0.17
 0 14 -6 1.97 0.17
 0 -14 -6 2.23 0.16
 0 -14 6 2.05 0.17
 0 -14 -6 1.91 0.17
 0 14 7 1.49 0.14
 0 14 -7 1.4 0.16
 0 -14 7 1.56 0.14
 0 -14 -7 1.39 0.14
 0 14 -8 0.03 0.05
 0 14 8 0.01 0.02
 0 -14 8 0.03 0.03
 0 -14 -8 -0.01 0.04
 0 14 -9 1.26 0.16
 0 -14 -9 1.15 0.16
 0 -14 9 1.1 0.14
 0 14 -10 0.23 0.14
 0 -14 10 -0.01 0.04
 0 -14 -10 0.06 0.05
 0 -15 0 0.12 0.04
 0 15 -1 9.01 0.59
 0 15 1 10.46 0.6
 0 15 -1 9.26 0.59
 0 -15 -1 10.95 0.58
 0 -15 1 9.53 0.58
 0 15 -2 2.24 0.15
 0 15 -2 2.29 0.15
 0 15 2 2.16 0.16
 0 -15 2 2.32 0.16
 0 -15 -2 2.37 0.16
 0 15 -3 1.59 0.11
 0 15 3 1.48 0.13
 0 15 -3 1.65 0.12
 0 -15 3 1.68 0.12
 0 -15 -3 1.48 0.11
 0 -15 -3 1.59 0.12
 0 15 4 1.15 0.11
 0 15 -4 1.26 0.11
 0 -15 4 1.21 0.11
 0 -15 -4 1.28 0.11
 0 15 -5 2.67 0.19
 0 15 5 2.12 0.18
 0 -15 5 2.6 0.18
 0 -15 -5 2.29 0.18
 0 15 -6 0.19 0.08
 0 15 6 0.18 0.07
 0 -15 -6 0.24 0.08
 0 -15 6 0.21 0.08
 0 15 7 0.23 0.08
 0 15 -7 0.39 0.11
 0 -15 7 0.44 0.09
 0 -15 -7 0.2 0.08
 0 15 -8 0.06 0.05
 0 15 8 0.03 0.02
 0 -15 -8 0.11 0.09
 0 -15 8 0 0.03
 0 15 -9 0.14 0.12
 0 -15 -9 0 0.04
 0 -15 9 0.01 0.03
 0 15 -10 0.41 0.13
 0 -15 -10 0.57 0.13
 0 -15 10 0.24 0.11
 0 16 0 9.93 0.6
 0 -16 0 9.78 0.58
 0 16 1 1.98 0.15
 0 16 -1 2.11 0.15
 0 16 -1 1.92 0.13
 0 -16 -1 2.11 0.14
 0 -16 1 2.11 0.14
 0 16 -2 0.54 0.06
 0 16 2 0.41 0.07
 0 16 -2 0.5 0.05
 0 -16 2 0.54 0.06
 0 -16 -2 0.48 0.06
 0 16 -3 0.04 0.02
 0 16 3 0.02 0.01
 0 16 -3 0.04 0.03
 0 -16 3 0.02 0.02
 0 -16 -3 0.03 0.02
 0 16 4 2.27 0.19
 0 16 -4 2.85 0.19
 0 -16 -4 2.59 0.19
 0 -16 4 2.74 0.19
 0 16 5 0.84 0.1
 0 16 -5 0.85 0.1
 0 -16 -5 0.77 0.1
 0 -16 5 0.98 0.1
 0 16 6 1.34 0.13
 0 16 -6 1.5 0.14
 0 -16 -6 1.16 0.13
 0 -16 6 1.48 0.13
 0 16 7 0.62 0.1
 0 16 -7 0.63 0.11
 0 -16 -7 0.62 0.11
 0 -16 7 0.36 0.1
 0 16 -8 0.6 0.12
 0 16 8 0.55 0.1
 0 -16 8 0.73 0.12
 0 -16 -8 0.53 0.12
 0 16 -9 0.21 0.12
 0 -16 9 0.32 0.11
 0 -16 -9 0.38 0.12
 0 16 -10 0.32 0.13
 0 -16 -10 0.04 0.05
 0 -16 10 0.01 0.04
 0 17 0 0.06 0.05
 0 -17 0 0.05 0.04
 0 17 1 2 0.15
 0 17 -1 1.99 0.14
 0 -17 1 1.92 0.14
 0 -17 -1 2.04 0.14
 0 17 -2 0.12 0.04
 0 17 2 0.12 0.05
 0 17 -2 0.13 0.04
 0 -17 -2 0.14 0.05
 0 -17 2 0.14 0.05
 0 17 3 2.66 0.18
 0 17 -3 2.36 0.16
 0 17 -3 2.06 0.16
 0 -17 3 2.2 0.17
 0 -17 -3 2.63 0.17
 0 17 4 0.25 0.06
 0 17 -4 0.32 0.07
 0 -17 4 0.2 0.06
 0 -17 -4 0.25 0.06
 0 17 -5 0.16 0.07
 0 17 5 0.12 0.07
 0 -17 5 0.18 0.07
 0 -17 -5 0.1 0.06
 0 17 6 2.44 0.18
 0 17 -6 2.01 0.18
 0 -17 6 2.18 0.17
 0 -17 -6 2.22 0.18
 0 17 -7 0.45 0.11
 0 17 7 0.34 0.09
 0 -17 7 0.58 0.1
 0 -17 -7 0.34 0.1
 0 17 8 0.63 0.11
 0 17 -8 0.64 0.13
 0 -17 8 0.57 0.11
 0 -17 -8 0.73 0.12
 0 17 -9 0.32 0.13
 0 -17 9 0.43 0.11
 0 -17 -9 0.25 0.12
 0 18 0 1.85 0.14
 0 -18 0 1.88 0.14
 0 18 1 0.77 0.08
 0 18 -1 0.76 0.08
 0 -18 -1 0.69 0.08
 0 -18 1 0.88 0.08
 0 18 2 3.91 0.26
 0 18 -2 3.41 0.25
 0 -18 -2 3.92 0.25
 0 -18 2 4 0.25
 0 18 -3 3.79 0.24
 0 18 -3 3.68 0.25
 0 18 3 3.65 0.26
 0 -18 3 3.98 0.25
 0 -18 -3 3.52 0.25
 0 18 -4 0 0.02
 0 18 4 0.1 0.06
 0 -18 4 0.02 0.02
 0 -18 -4 0.03 0.02
 0 18 -5 0.03 0.03
 0 18 5 0.01 0.02
 0 -18 -5 -0.01 0.02
 0 -18 5 0.02 0.02
 0 18 -6 0.02 0.03
 0 18 6 0.1 0.08
 0 -18 6 0.04 0.03
 0 -18 -6 0.03 0.03
 0 18 -7 3.44 0.26
 0 18 7 3.4 0.26
 0 -18 -7 3.26 0.25
 0 -18 7 3.36 0.25
 0 18 -8 0.27 0.12
 0 18 8 0.12 0.09
 0 -18 -8 0.1 0.04
 0 -18 8 0.13 0.1
 0 18 -9 0.17 0.12
 0 -18 -9 0 0.04
 0 -18 9 0.05 0.04
 0 19 0 0 0.01
 0 -19 0 0.02 0.02
 0 19 -1 1 0.1
 0 19 1 1.05 0.11
 0 -19 1 1.34 0.1
 0 -19 -1 1.08 0.1
 0 19 -2 1 0.09
 0 19 2 0.96 0.1
 0 -19 2 1.02 0.09
 0 -19 -2 0.97 0.09
 0 19 -3 2.55 0.17
 0 19 3 2.17 0.18
 0 -19 -3 2.29 0.17
 0 -19 3 2.48 0.17
 0 19 -4 1.62 0.13
 0 19 4 1.38 0.14
 0 -19 4 1.64 0.13
 0 -19 -4 1.49 0.13
 0 19 5 0.78 0.11
 0 19 -5 0.85 0.1
 0 -19 -5 0.79 0.1
 0 -19 5 0.78 0.1
 0 19 6 0.59 0.1
 0 19 -6 0.55 0.1
 0 -19 6 0.46 0.09
 0 -19 -6 0.34 0.09
 0 19 7 2.55 0.2
 0 19 -7 2.35 0.2
 0 -19 -7 2.17 0.2
 0 -19 7 2.15 0.19
 0 19 -8 0.07 0.05
 0 19 8 -0.01 0.02
 0 -19 -8 0.01 0.04
 0 -19 8 0.07 0.04
 0 19 -9 0.39 0.13
 0 -19 9 0.34 0.11
 0 -19 -9 0.23 0.12
 0 20 0 0.14 0.06
 0 -20 0 0.15 0.05
 0 20 1 0.48 0.08
 0 20 -1 0.55 0.07
 0 -20 -1 0.57 0.07
 0 -20 1 0.56 0.07
 0 20 -2 0.34 0.07
 0 20 2 0.71 0.09
 0 -20 2 0.48 0.07
 0 -20 -2 0.67 0.08
 0 20 3 0.08 0.06
 0 20 -3 0.1 0.05
 0 -20 -3 0.08 0.06
 0 -20 3 0.12 0.06
 0 20 4 0.52 0.09
 0 -20 -4 0.6 0.09
 0 -20 4 0.53 0.08
 0 20 5 3.3 0.25
 0 -20 5 3.41 0.24
 0 -20 -5 3.09 0.23
 0 20 6 1.07 0.13
 0 20 -6 0.77 0.11
 0 -20 6 0.78 0.11
 0 -20 -6 0.89 0.12
 0 20 7 1.93 0.18
 0 20 -7 1.78 0.17
 0 -20 7 1.7 0.16
 0 -20 -7 1.63 0.17
 0 20 -8 0.03 0.05
 0 20 8 0.05 0.03
 0 -20 8 0.14 0.1
 0 -20 -8 0.07 0.04
 0 20 -9 0.38 0.13
 0 -20 -9 0.53 0.13
 0 -20 9 0.42 0.11
 0 21 0 -0.02 0.01
 0 -21 0 0.02 0.02
 0 21 1 3.25 0.23
 0 21 -1 2.85 0.22
 0 -21 1 3.06 0.21
 0 -21 -1 3.39 0.21
 0 21 2 2.1 0.17
 0 21 -2 2.15 0.16
 0 -21 2 2.33 0.16
 0 -21 -2 2.02 0.16
 0 21 3 3.46 0.24
 0 21 -3 3.12 0.22
 0 -21 -3 3.46 0.22
 0 -21 3 2.82 0.22
 0 21 4 -0.01 0.02
 0 -21 -4 -0.02 0.02
 0 -21 4 0.02 0.02
 0 21 5 5.91 0.39
 0 -21 -5 5.59 0.37
 0 -21 5 5.5 0.37
 0 21 6 0.17 0.1
 0 -21 -6 0.11 0.09
 0 -21 6 0.05 0.03
 0 21 7 0.02 0.02
 0 -21 -7 0.02 0.03
 0 -21 7 0.03 0.03
 0 21 8 0.01 0.02
 0 -21 8 0.02 0.04
 0 -21 -8 0 0.04
 0 -21 9 0.25 0.11
 0 -21 -9 0.05 0.04
 0 22 0 0.01 0.02
 0 -22 0 0.01 0.02
 0 22 1 0.02 0.02
 0 22 -1 0.01 0.01
 0 -22 1 0.03 0.02
 0 -22 -1 0.02 0.02
 0 22 2 2.41 0.19
 0 22 -2 2.33 0.17
 0 -22 -2 2.52 0.17
 0 -22 2 2.14 0.17
 0 22 -3 0.61 0.08
 0 22 3 0.44 0.09
 0 -22 3 0.43 0.08
 0 -22 -3 0.46 0.08
 0 22 4 3.17 0.24
 0 -22 4 2.86 0.22
 0 -22 -4 3.09 0.22
 0 22 5 1.43 0.16
 0 -22 5 1.39 0.14
 0 -22 -5 1.38 0.14
 0 22 6 2.06 0.19
 0 -22 -6 2.12 0.18
 0 -22 6 1.74 0.17
 0 22 7 -0.01 0.02
 0 -22 7 -0.02 0.03
 0 -22 -7 -0.02 0.03
 0 22 8 0.08 0.03
 0 -22 -8 0.23 0.11
 0 -22 8 0.07 0.04
 0 23 0 0.02 0.02
 0 -23 0 0.03 0.02
 0 23 -1 0.36 0.08
 0 23 1 0.63 0.09
 0 -23 -1 0.55 0.08
 0 -23 1 0.46 0.08
 0 23 -2 0.15 0.06
 0 -23 2 0.13 0.07
 0 -23 -2 0.18 0.06
 0 -23 3 0.26 0.07
 0 -23 -3 0.12 0.07
 0 23 4 0.27 0.09
 0 -23 4 0.22 0.07
 0 -23 -4 0.16 0.07
 0 23 5 0.81 0.12
 0 -23 5 0.69 0.11
 0 -23 -5 0.89 0.11
 0 23 6 0.47 0.12
 0 -23 6 0.37 0.1
 0 -23 -6 0.57 0.1
 0 23 7 0.03 0.03
 0 -23 -7 0.02 0.04
 0 -23 7 0.05 0.04
 0 23 8 0.21 0.11
 0 -23 8 0.22 0.1
 0 -23 -8 0.06 0.04
 0 24 0 0.24 0.08
 0 -24 0 0.23 0.07
 0 24 -1 2.92 0.21
 0 24 1 2.83 0.22
 0 -24 1 2.66 0.2
 0 -24 -1 2.93 0.2
 0 24 -2 0.01 0.02
 0 24 2 0 0.02
 0 -24 -2 0.01 0.02
 0 -24 2 0.09 0.06
 0 24 3 0.44 0.1
 0 -24 3 0.57 0.08
 0 -24 -3 0.34 0.08
 0 24 4 0.06 0.03
 0 -24 4 0.1 0.07
 0 -24 -4 0.2 0.07
 0 24 5 0.26 0.1
 0 -24 5 0.37 0.09
 0 -24 -5 0.22 0.09
 0 24 6 0.23 0.11
 0 -24 6 0.17 0.1
 0 24 7 0 0.03
 0 -24 -7 0 0.03
 0 -24 7 0.01 0.04
 0 -24 8 0.21 0.11
 0 -24 -8 0.17 0.11
 0 -25 0 0.11 0.06
 0 25 1 0.25 0.09
 0 25 -1 0.25 0.08
 0 -25 1 0.33 0.08
 0 -25 -1 0.26 0.07
 0 25 2 0.28 0.09
 0 25 -2 0.31 0.08
 0 -25 -2 0.35 0.07
 0 -25 2 0.26 0.07
 0 -25 -3 0.23 0.07
 0 -25 3 0.18 0.07
 0 25 4 0 0.02
 0 -25 -4 -0.01 0.02
 0 -25 4 0 0.02
 0 25 5 0.47 0.12
 0 -25 5 0.48 0.1
 0 -25 -5 0.28 0.09
 0 25 6 0.97 0.14
 0 -25 6 0.93 0.13
 0 -25 -6 0.98 0.13
 0 25 7 0.02 0.03
 0 -25 7 0.16 0.1
 0 -25 -7 0 0.04
 0 26 0 1.52 0.15
 0 -26 0 1.37 0.13
 0 26 -1 1.74 0.15
 0 26 1 1.6 0.15
 0 -26 1 1.37 0.13
 0 -26 -1 1.44 0.13
 0 26 -2 1.01 0.11
 0 26 2 0.86 0.12
 0 -26 2 0.85 0.1
 0 -26 -2 0.66 0.1
 0 26 3 0.69 0.13
 0 -26 3 0.92 0.11
 0 -26 -3 0.98 0.11
 0 26 4 0.51 0.11
 0 -26 4 0.38 0.09
 0 -26 -4 0.35 0.09
 0 26 5 1.3 0.16
 0 -26 5 1.33 0.14
 0 -26 -5 1.21 0.13
 0 26 6 0.4 0.12
 0 -26 -6 0.19 0.1
 0 -26 6 0.05 0.04
 0 26 7 0.01 0.03
 0 -26 -7 0.07 0.04
 0 -26 7 0.03 0.04
 0 27 0 0 0.02
 0 -27 0 0 0.03
 0 27 -1 0.41 0.1
 0 27 1 0.51 0.11
 0 -27 1 0.49 0.09
 0 -27 -1 0.37 0.08
 0 27 2 0.21 0.1
 0 -27 -2 0.1 0.08
 0 -27 2 0.13 0.07
 0 27 3 1.28 0.15
 0 -27 3 0.85 0.12
 0 -27 -3 1.05 0.12
 0 27 4 0.26 0.12
 0 -27 4 0.22 0.08
 0 -27 -4 0.24 0.08
 0 27 5 0.28 0.13
 0 -27 5 0.04 0.04
 0 -27 -5 0.02 0.03
 0 27 6 1.53 0.19
 0 27 7 0.03 0.03
 0 28 0 0.03 0.02
 0 28 -1 1.65 0.16
 0 28 1 1.51 0.16
 0 28 2 1.49 0.16
 0 28 -2 1.1 0.13
 0 28 3 -0.03 0.02
 0 28 4 0.01 0.03
 0 28 5 0.18 0.12
 0 28 6 0.02 0.03
 0 29 0 0.02 0.02
 0 29 1 0.21 0.11
 0 29 -1 0.34 0.11
 0 29 2 0.18 0.11
 0 29 3 0.02 0.03
 0 29 4 0.04 0.03
 0 29 5 0.68 0.15
 0 29 6 -0.03 0.03
 0 30 0 1.49 0.17
 0 30 1 -0.01 0.03
 0 30 -1 -0.01 0.02
 0 30 2 0.19 0.11
 0 30 3 0.28 0.13
 0 30 4 0 0.03
 0 30 5 0.01 0.03
 0 31 0 -0.01 0.02
 0 31 1 0.25 0.13
 0 31 2 0.32 0.12
 0 31 3 0.19 0.13
 0 31 4 0.26 0.14
 0 32 0 0.15 0.12
 0 32 1 0 0.03
 0 32 -1 -0.02 0.02
 0 32 2 0.79 0.15
 0 32 3 0.06 0.04
 0 32 4 0.08 0.04
 0 33 0 0.04 0.03
 0 33 1 0.52 0.15
 0 33 2 0.04 0.03
 0 33 3 0.28 0.15
 0 34 0 1.83 0.2
 0 34 1 0 0.03
 -1 0 11 0.13 0.1
 1 0 -11 0.03 0.06
 -1 0 10 0.11 0.09
 1 0 -10 -0.05 0.05
 -1 0 9 -0.02 0.03
 1 0 -9 0 0.04
 1 0 -8 16.2 1.02
 -1 0 8 16.59 0.98
 1 0 -7 0.02 0.03
 -1 0 7 -0.01 0.02
 -1 0 6 30.93 1.78
 -1 0 6 30.35 1.75
 1 0 -6 29.37 1.83
 -1 0 5 0.03 0.02
 -1 0 5 0 0.02
 1 0 -5 0 0.02
 -1 0 4 36.51 2.12
 -1 0 4 35.63 2.07
 1 0 -4 35.8 2.17
 -1 0 3 0 0.01
 -1 0 3 0.02 0.02
 1 0 -3 0.02 0.02
 -1 0 2 333.5 19.19
 -1 0 2 351.95 19.75
 1 0 -2 323.82 20.12
 1 0 -1 -0.02 0.01
 1 0 -1 -0.03 0.01
 -1 0 0 67.75 4.04
 1 0 0 68.96 3.92
 1 0 1 0.03 0.02
 1 0 1 0 0.01
 1 0 2 1.31 0.09
 1 0 2 1.29 0.08
 1 0 2 1.3 0.09
 1 0 3 0 0.01
 1 0 3 0 0.01
 1 0 3 -0.01 0
 1 0 4 5.14 0.34
 1 0 4 5.5 0.32
 1 0 4 5.34 0.33
 1 0 5 0.06 0.05
 1 0 5 0.01 0.02
 1 0 5 0.01 0.01
 1 0 6 18.74 1.08
 -1 0 -6 17.77 1.12
 1 0 7 0.01 0.02
 -1 0 -7 -0.02 0.03
 -1 0 -8 0.24 0.1
 1 0 8 0.38 0.09
 -1 0 -9 0.33 0.13
 -1 0 -10 0.04 0.06
 1 0 10 0.14 0.11
 -1 0 -11 0.29 0.14
 -1 1 11 0.44 0.12
 1 1 -11 0.24 0.15
 -1 -1 11 0.25 0.11
 1 -1 -11 0.29 0.15
 -1 1 10 0.02 0.03
 1 1 -10 0.07 0.06
 1 -1 -10 0.04 0.05
 -1 -1 10 0.05 0.04
 -1 1 9 0.56 0.1
 1 1 -9 0.53 0.11
 -1 -1 9 0.58 0.1
 1 -1 -9 0.59 0.12
 -1 1 8 1.26 0.13
 1 1 -8 1.6 0.15
 1 -1 -8 1.69 0.15
 -1 -1 8 1.34 0.14
 -1 1 7 0.75 0.1
 1 -1 -7 0.88 0.11
 -1 -1 7 1.25 0.11
 -1 1 6 2.22 0.14
 -1 1 6 2.19 0.16
 1 1 -6 2.23 0.17
 1 -1 -6 2.27 0.17
 -1 -1 6 2.08 0.16
 -1 -1 6 2.07 0.14
 -1 1 5 13.93 0.87
 -1 1 5 14.7 0.88
 1 1 -5 15.35 0.91
 -1 -1 5 15.1 0.87
 -1 -1 5 16.01 0.88
 1 -1 -5 13.8 0.91
 -1 1 4 107.48 6.2
 -1 1 4 110.94 6.37
 1 1 -4 107.51 6.5
 -1 -1 4 111.57 6.38
 -1 -1 4 108.29 6.2
 1 -1 -4 105.84 6.5
 1 1 -3 62.33 3.65
 -1 1 3 62.41 3.58
 -1 1 3 58.35 3.48
 -1 -1 3 60.58 3.48
 1 -1 -3 58.37 3.65
 -1 -1 3 63.33 3.58
 -1 1 2 171.77 9.84
 1 1 -2 170.81 10.03
 -1 1 2 168.87 9.56
 -1 -1 2 168.26 9.83
 1 -1 -2 163.05 10.03
 -1 -1 2 161.11 9.55
 -1 1 1 192.65 10.39
 1 1 -1 160 10.58
 -1 -1 1 160.21 10.08
 1 -1 -1 191.62 10.1
 -1 -1 1 160.78 10.39
 1 -1 -1 194.72 10.59
 1 1 0 68.85 4
 1 1 0 65.65 3.81
 1 1 0 68.96 3.94
 -1 1 0 64.51 3.93
 1 -1 0 67.03 4
 1 -1 0 66.24 3.82
 1 1 1 10.8 0.62
 1 -1 1 10.76 0.66
 1 1 2 5.31 0.32
 1 1 2 5.46 0.33
 1 1 2 5.49 0.32
 1 -1 2 5.35 0.32
 1 -1 2 5.29 0.33
 1 -1 2 5.36 0.32
 1 1 3 0.94 0.07
 1 1 3 0.92 0.08
 1 -1 3 1.23 0.07
 1 1 4 3.36 0.22
 1 1 4 3.38 0.23
 1 1 4 3.24 0.21
 1 -1 4 3.43 0.22
 1 -1 4 3.48 0.23
 1 -1 4 3.36 0.21
 1 1 5 5.45 0.31
 1 1 5 5.15 0.31
 1 1 5 5.08 0.33
 1 -1 5 4.66 0.32
 1 -1 5 4.69 0.31
 1 -1 5 4.75 0.3
 -1 1 -6 0.55 0.09
 1 1 6 0.48 0.08
 1 -1 6 0.43 0.08
 -1 -1 -6 0.48 0.08
 -1 1 -7 0.28 0.08
 1 1 7 0.4 0.08
 1 -1 7 0.27 0.07
 -1 -1 -7 0.38 0.09
 1 1 8 -0.02 0.02
 -1 1 -8 0.26 0.1
 -1 -1 -8 0.04 0.04
 1 -1 8 0 0.03
 1 1 9 2.78 0.22
 -1 1 -9 2.65 0.24
 1 -1 9 2.43 0.21
 -1 -1 -9 2.72 0.24
 1 1 10 0.15 0.1
 -1 1 -10 0.16 0.13
 -1 -1 -10 0.19 0.12
 1 -1 10 0.06 0.04
 1 1 11 0.8 0.14
 -1 1 -11 0.7 0.16
 -1 -1 -11 0.95 0.16
 1 -1 11 0.84 0.13
 -1 2 11 0.52 0.12
 1 2 -11 0.39 0.16
 1 -2 -11 0.55 0.15
 -1 -2 11 0.54 0.12
 1 2 -10 0.33 0.12
 -1 2 10 0.16 0.1
 1 -2 -10 0.09 0.06
 -1 -2 10 0.38 0.1
 -1 2 9 0.54 0.1
 1 2 -9 0.5 0.11
 1 -2 -9 0.57 0.12
 -1 -2 9 0.42 0.09
 1 2 -8 7.49 0.54
 -1 2 8 9.05 0.52
 -1 -2 8 7.46 0.51
 1 -2 -8 9.04 0.54
 -1 2 7 2.43 0.18
 1 2 -7 2.36 0.19
 -1 -2 7 2.48 0.18
 1 -2 -7 2.55 0.19
 1 2 -6 2.86 0.2
 -1 2 6 2.52 0.17
 -1 2 6 2.76 0.19
 1 -2 -6 3.24 0.2
 -1 -2 6 2.19 0.18
 -1 2 5 0.84 0.07
 1 2 -5 0.91 0.09
 -1 2 5 0.83 0.08
 -1 -2 5 0.79 0.08
 1 -2 -5 0.91 0.09
 -1 -2 5 0.9 0.06
 -1 2 4 44.43 2.09
 1 2 -4 32.08 2.19
 -1 -2 4 32.77 2.13
 -1 2 3 1.42 0.1
 -1 2 3 1.46 0.1
 1 2 -3 1.46 0.1
 -1 -2 3 1.42 0.09
 -1 -2 3 1.39 0.1
 1 -2 -3 1.45 0.1
 -1 2 2 202.59 10.93
 -1 2 2 200.61 11.26
 1 2 -2 176.04 11.46
 1 -2 -2 203.55 10.94
 -1 -2 2 173.57 10.93
 -1 -2 2 179.42 11.24
 1 -2 -2 205.14 11.47
 1 2 -1 20.6 1.22
 1 2 -1 20.86 1.24
 -1 2 1 20.7 1.22
 -1 -2 1 19.96 1.18
 1 -2 -1 20.88 1.24
 -1 -2 1 21.09 1.22
 1 2 0 24.48 1.56
 1 2 0 24.92 1.53
 1 2 0 23.53 1.48
 -1 2 0 28.7 1.53
 1 -2 0 28.52 1.56
 1 2 1 67.69 3.91
 1 2 1 65.71 3.79
 -1 2 -1 65.84 3.9
 1 2 1 66.48 3.98
 1 -2 1 68.47 3.79
 1 -2 1 65.12 3.98
 1 2 2 59.62 3.36
 1 2 2 57.92 3.21
 -1 2 -2 53.61 3.3
 1 2 2 56.86 3.3
 1 -2 2 53.79 3.36
 1 -2 2 55.37 3.21
 1 2 3 0.38 0.04
 1 2 3 0.36 0.05
 1 2 3 0.38 0.04
 -1 2 -3 0.34 0.03
 1 -2 3 0.37 0.05
 1 -2 3 0.43 0.05
 -1 2 -4 45.77 2.61
 1 2 4 41.42 2.55
 1 2 4 41.68 2.68
 1 2 4 41.97 2.62
 1 -2 4 48.05 2.56
 1 -2 4 48.41 2.68
 -1 2 -5 13.3 0.79
 1 2 5 13.23 0.79
 1 2 5 14.1 0.8
 1 -2 5 12.64 0.82
 1 -2 5 13.47 0.79
 1 2 6 0.97 0.1
 -1 2 -6 1.11 0.11
 1 -2 6 0.96 0.11
 -1 -2 -6 0.95 0.11
 1 2 7 0 0.02
 -1 2 -7 0 0.03
 1 -2 7 0 0.02
 -1 -2 -7 0 0.03
 1 2 8 3.3 0.23
 -1 2 -8 2.91 0.24
 1 -2 8 3 0.23
 -1 -2 -8 3.11 0.24
 1 2 9 0.02 0.03
 -1 2 -9 0.01 0.05
 -1 -2 -9 0.15 0.11
 1 -2 9 0 0.03
 -1 2 -10 0.87 0.17
 1 2 10 0.75 0.13
 -1 -2 -10 0.87 0.16
 1 -2 10 0.97 0.14
 -1 2 -11 0.26 0.15
 1 2 11 0.03 0.04
 -1 -2 -11 0.17 0.13
 1 -2 11 0.05 0.04
 1 3 -11 0.01 0.06
 -1 3 11 0.3 0.11
 -1 -3 11 0.06 0.04
 1 -3 -11 0.09 0.06
 -1 3 10 0.02 0.04
 1 3 -10 0.1 0.06
 1 -3 -10 0.06 0.05
 -1 -3 10 0.07 0.04
 1 3 -9 0.39 0.11
 -1 3 9 0.45 0.09
 -1 -3 9 0.24 0.09
 1 -3 -9 0.53 0.11
 1 3 -8 1.61 0.16
 -1 3 8 1.64 0.15
 1 -3 -8 1.77 0.16
 -1 -3 8 1.74 0.15
 1 3 -7 -0.01 0.03
 -1 3 7 0.09 0.06
 -1 -3 7 0.01 0.02
 1 -3 -7 0.1 0.07
 1 3 -6 45.04 2.77
 -1 3 6 44.14 2.64
 -1 3 6 48.67 2.71
 1 -3 -6 45.56 2.77
 -1 -3 6 46.13 2.64
 -1 3 5 3.53 0.21
 -1 3 5 3.53 0.22
 -1 -3 5 2.88 0.22
 1 -3 -5 3.56 0.23
 -1 3 4 16.93 0.98
 -1 3 4 17.35 1
 1 3 -4 16.79 1.03
 1 -3 -4 16.31 1.03
 -1 -3 4 17.6 1
 -1 -3 4 16.44 0.98
 -1 3 3 12.71 0.76
 -1 3 3 12.74 0.74
 1 3 -3 12.88 0.78
 1 -3 -3 12.35 0.78
 -1 -3 3 13.1 0.74
 -1 -3 3 12.97 0.75
 -1 3 2 5.52 0.34
 1 3 -2 5.51 0.35
 1 -3 -2 5.79 0.33
 -1 -3 2 5.65 0.33
 1 -3 -2 5.59 0.34
 -1 -3 2 5.41 0.33
 1 3 -1 21.53 1.27
 1 3 -1 21.73 1.3
 -1 -3 1 21.29 1.23
 1 3 0 48 2.84
 -1 3 0 46.73 2.8
 1 3 0 45.83 2.8
 1 -3 0 47.49 2.85
 -1 -3 0 48.08 2.71
 1 -3 0 48.59 2.72
 -1 3 -1 121.01 7.11
 1 3 1 119.68 6.91
 1 3 1 120.78 7.26
 1 3 1 125.16 7.14
 1 -3 1 121.25 6.9
 1 -3 1 119.43 7.26
 1 3 2 1.03 0.07
 -1 3 -2 1.01 0.07
 1 3 2 0.98 0.07
 1 3 2 1.07 0.08
 1 -3 2 1.1 0.08
 1 -3 2 1.13 0.08
 1 3 3 43.86 2.69
 1 3 3 45.18 2.82
 -1 3 -3 47.43 2.75
 1 3 3 46.25 2.76
 1 -3 3 49.98 2.69
 1 -3 3 48.92 2.82
 -1 3 -4 3.62 0.23
 1 3 4 3.89 0.25
 1 3 4 3.93 0.24
 1 3 4 3.92 0.24
 1 -3 4 3.97 0.26
 1 -3 4 3.9 0.25
 1 3 5 1.19 0.08
 1 3 5 1.31 0.1
 1 -3 5 0.82 0.1
 1 -3 5 1.04 0.1
 1 3 6 0.51 0.07
 1 3 6 0.58 0.06
 -1 3 -6 0.52 0.08
 -1 -3 -6 0.47 0.09
 1 -3 6 0.48 0.08
 -1 3 -7 2.13 0.18
 1 3 7 1.94 0.17
 -1 -3 -7 2.14 0.18
 1 -3 7 2.31 0.18
 -1 3 -8 0.14 0.09
 1 3 8 0.2 0.09
 -1 -3 -8 0.36 0.1
 1 -3 8 0.2 0.08
 -1 3 -9 0.3 0.12
 1 3 9 0.28 0.1
 -1 -3 -9 0.42 0.12
 1 -3 9 0.24 0.1
 1 3 10 0.97 0.14
 -1 3 -10 0.93 0.16
 1 -3 10 1.05 0.14
 -1 -3 -10 1.02 0.15
 1 4 -11 0.11 0.06
 -1 4 11 0.15 0.12
 1 -4 -11 0.32 0.13
 1 -4 -11 0.3 0.14
 -1 -4 11 0.14 0.1
 1 4 -10 0.02 0.05
 -1 4 10 0.14 0.1
 1 -4 -10 0.02 0.05
 -1 -4 10 0.01 0.03
 1 4 -9 0.42 0.11
 -1 4 9 0.31 0.09
 1 -4 -9 0.56 0.11
 -1 -4 9 0.29 0.09
 1 4 -8 0.86 0.12
 -1 4 8 1.29 0.12
 -1 -4 8 0.88 0.11
 1 -4 -8 1.47 0.14
 -1 4 7 0.9 0.08
 1 4 -7 0.73 0.1
 -1 4 7 0.86 0.1
 -1 -4 7 0.85 0.09
 1 -4 -7 0.92 0.1
 -1 4 6 3.5 0.22
 -1 4 6 3.1 0.23
 1 -4 -6 3.51 0.24
 -1 4 5 2.02 0.14
 1 4 -5 2.01 0.15
 -1 4 5 2.04 0.14
 -1 -4 5 2.1 0.14
 1 -4 -5 1.93 0.15
 -1 4 4 2.06 0.14
 1 4 -4 1.75 0.15
 -1 4 4 2.44 0.14
 1 4 -3 0.06 0.03
 -1 4 3 0.06 0.02
 -1 4 3 0.05 0.03
 1 -4 -3 0.01 0.01
 -1 -4 3 0.05 0.02
 -1 -4 3 0.03 0.01
 1 -4 -3 0.02 0.01
 1 4 -2 271.58 16.09
 -1 4 2 268.8 15.8
 1 4 -2 270.14 15.78
 -1 -4 2 272.3 16.34
 1 -4 -2 255.67 16.08
 1 -4 -2 275.99 15.36
 1 4 -1 58.91 3.48
 -1 4 1 59.93 3.48
 1 4 -1 59.41 3.54
 -1 -4 1 58.23 3.38
 1 -4 -1 59.98 3.54
 1 4 0 207.4 13
 -1 4 0 236.85 13
 1 4 0 201.29 13.21
 -1 -4 0 199.14 12.59
 1 -4 0 245.71 13.23
 1 -4 0 237.41 12.62
 1 4 1 1.41 0.09
 1 4 1 1.37 0.09
 -1 4 -1 1.36 0.09
 1 4 1 1.36 0.09
 1 -4 1 1.44 0.09
 1 -4 1 1.39 0.09
 1 4 2 76.54 4.37
 -1 4 -2 77.08 4.49
 1 4 2 77.21 4.58
 1 4 2 77.06 4.5
 1 -4 2 76.61 4.37
 1 -4 2 74.87 4.58
 1 4 3 0.05 0.03
 1 4 3 0.07 0.03
 1 -4 3 0.09 0.04
 1 -4 3 0.09 0.04
 1 4 4 2.11 0.14
 1 4 4 1.92 0.14
 1 4 4 2.13 0.13
 1 -4 4 1.88 0.15
 1 -4 4 1.83 0.14
 1 4 5 0.11 0.05
 1 4 5 0.19 0.04
 1 -4 5 0.17 0.05
 -1 -4 -5 0.14 0.05
 1 -4 5 0.14 0.05
 1 4 6 0.26 0.07
 -1 4 -6 0.25 0.07
 1 4 6 0.3 0.05
 -1 -4 -6 0.35 0.08
 1 -4 6 0.2 0.07
 1 4 7 0.36 0.08
 -1 4 -7 0.35 0.09
 1 -4 7 0.46 0.08
 -1 -4 -7 0.21 0.09
 1 4 8 0.01 0.03
 -1 4 -8 0.02 0.04
 -1 -4 -8 0.01 0.04
 1 -4 8 -0.01 0.03
 1 4 9 0 0.03
 -1 4 -9 -0.04 0.04
 1 -4 9 -0.02 0.03
 -1 -4 -9 0.03 0.05
 -1 4 -10 0.6 0.16
 1 4 10 0.23 0.11
 -1 -4 -10 0.27 0.12
 1 -4 10 0.35 0.12
 -1 5 11 -0.03 0.04
 1 5 -11 0.16 0.13
 1 -5 -11 0.03 0.05
 -1 -5 11 -0.02 0.04
 1 -5 -11 0.15 0.12
 1 5 -10 0.2 0.12
 -1 5 10 0 0.04
 1 -5 -10 0.24 0.13
 -1 -5 10 0.05 0.04
 1 -5 -10 0.02 0.05
 -1 5 9 2.51 0.2
 1 5 -9 2.19 0.2
 -1 -5 9 2.31 0.19
 1 -5 -9 2.49 0.21
 1 5 -8 0.66 0.11
 -1 5 8 0.75 0.1
 1 -5 -8 0.66 0.11
 -1 -5 8 0.58 0.09
 1 5 -7 0.01 0.03
 -1 5 7 0.01 0.02
 -1 5 7 0.13 0.04
 1 -5 -7 0.13 0.08
 -1 -5 7 0.04 0.02
 1 5 -6 0.81 0.1
 -1 5 6 0.72 0.07
 -1 5 6 0.63 0.08
 1 -5 -6 0.8 0.09
 -1 -5 6 0.76 0.08
 1 5 -5 2.9 0.22
 -1 5 5 3.67 0.22
 -1 5 5 3.4 0.21
 1 -5 -5 3.55 0.23
 -1 -5 5 2.98 0.21
 1 5 -4 12.96 0.82
 -1 5 4 13.34 0.78
 -1 5 4 13.82 0.8
 1 -5 -4 13.14 0.82
 -1 -5 4 13.48 0.78
 1 -5 -4 13.37 0.78
 1 5 -3 37.22 2.34
 -1 5 3 40.43 2.3
 1 -5 -3 40.23 2.34
 1 -5 -3 41.09 2.24
 -1 -5 3 37.95 2.23
 -1 -5 3 37.14 2.29
 1 5 -2 3.77 0.25
 -1 5 2 3.92 0.24
 1 5 -2 4.08 0.24
 1 -5 -2 4.01 0.25
 -1 -5 2 4.06 0.23
 1 -5 -2 3.85 0.24
 1 5 -1 34.99 1.89
 -1 5 1 27.89 1.89
 1 5 -1 36.67 1.92
 1 -5 -1 28.64 1.84
 -1 -5 1 35.34 1.83
 1 -5 -1 28.4 1.92
 1 5 0 68.37 4.16
 -1 5 0 70.63 4.16
 1 5 0 71.22 4.23
 -1 -5 0 69.87 4.04
 1 -5 0 71.54 4.04
 1 -5 0 73.65 4.23
 1 5 1 6.3 0.36
 1 5 1 6.03 0.36
 -1 5 -1 5.46 0.35
 1 5 1 6.52 0.34
 -1 -5 -1 6.31 0.34
 1 -5 1 5.21 0.34
 1 -5 1 5.27 0.36
 1 5 2 0.44 0.04
 1 5 2 0.63 0.05
 -1 5 -2 0.5 0.04
 1 5 2 0.43 0.04
 1 -5 2 0.49 0.05
 1 -5 2 0.43 0.05
 1 5 3 15.39 0.92
 1 5 3 16.01 0.96
 1 5 3 15.45 0.94
 -1 5 -3 15.74 0.93
 1 -5 3 16.1 0.96
 1 -5 3 16.15 0.92
 1 5 4 2.45 0.16
 1 5 4 2.39 0.17
 1 5 4 2.36 0.16
 1 -5 4 2.55 0.18
 1 -5 4 2.47 0.17
 1 5 5 1.28 0.11
 1 5 5 1.17 0.11
 1 -5 5 1.78 0.12
 -1 -5 -5 1.54 0.12
 1 -5 5 1.67 0.13
 1 5 6 2.47 0.18
 1 5 6 2.61 0.17
 1 -5 6 2.52 0.19
 -1 -5 -6 2.45 0.19
 1 5 7 3.93 0.3
 -1 5 -7 5.05 0.33
 1 -5 7 5.35 0.32
 -1 -5 -7 4.35 0.32
 1 5 8 -0.01 0.03
 -1 5 -8 0.14 0.09
 1 -5 8 0.02 0.03
 -1 -5 -8 -0.01 0.04
 1 5 9 0.26 0.1
 -1 5 -9 0.43 0.12
 1 -5 9 0.26 0.1
 -1 -5 -9 0.23 0.12
 1 5 10 0.1 0.05
 -1 5 -10 0.35 0.13
 -1 -5 -10 0.07 0.05
 1 -5 10 0.05 0.04
 1 6 -11 0.09 0.06
 -1 6 11 0.21 0.11
 1 -6 -11 0.12 0.06
 1 -6 -11 0.06 0.06
 -1 -6 11 0.08 0.05
 1 6 -10 0.02 0.05
 -1 6 10 0.01 0.04
 -1 -6 10 0.02 0.03
 1 -6 -10 -0.02 0.04
 1 -6 -10 -0.01 0.05
 1 6 -9 0.35 0.11
 -1 6 9 0.37 0.1
 1 -6 -9 0.25 0.1
 1 -6 -9 0.21 0.11
 -1 -6 9 0.27 0.09
 1 6 -8 1.18 0.14
 -1 6 8 1.4 0.14
 -1 -6 8 1.19 0.13
 1 -6 -8 1.51 0.14
 1 -6 -8 1.3 0.14
 -1 6 7 0.3 0.05
 -1 6 7 0.23 0.07
 1 6 -7 0.29 0.08
 -1 -6 7 0.32 0.07
 1 -6 -7 0.34 0.08
 1 -6 -7 0.26 0.08
 1 6 -6 0.19 0.07
 -1 6 6 0.05 0.04
 -1 6 6 -0.01 0.02
 1 -6 -6 0.02 0.02
 1 -6 -6 0.01 0.02
 -1 -6 6 0.05 0.02
 -1 6 5 0.01 0.01
 -1 6 5 0.02 0.02
 1 6 -5 0.01 0.02
 -1 -6 5 0 0.01
 1 -6 -5 0.01 0.02
 1 -6 -5 0.06 0.04
 -1 6 4 30.17 1.73
 1 6 -4 27.73 1.76
 1 -6 -4 30.04 1.76
 1 -6 -4 29.39 1.69
 -1 -6 4 28.83 1.68
 -1 6 3 2.72 0.18
 1 6 -3 2.77 0.18
 1 -6 -3 2.76 0.18
 -1 -6 3 2.85 0.17
 1 -6 -3 2.83 0.18
 -1 -6 3 2.69 0.17
 -1 6 2 19.57 1.11
 1 6 -2 18.13 1.1
 1 6 -2 17.24 1.13
 1 -6 -2 19.43 1.08
 1 -6 -2 19.79 1.13
 -1 -6 2 18.39 1.08
 1 6 -1 15.32 0.91
 1 6 -1 15.6 0.93
 -1 6 1 15.3 0.91
 1 -6 -1 15.4 0.93
 -1 -6 1 15.32 0.88
 1 -6 -1 15.56 0.89
 1 6 0 912.12 58.25
 1 6 0 928.62 57.6
 -1 6 0 1000 57.37
 -1 -6 0 957.28 55.45
 1 -6 0 963.84 56.57
 1 -6 0 998.09 58.4
 -1 6 -1 8.43 0.5
 1 6 1 8.25 0.51
 1 6 1 8.55 0.51
 1 -6 1 8.35 0.49
 1 -6 1 8.5 0.52
 -1 -6 -1 8.64 0.49
 1 6 2 1.61 0.11
 1 6 2 1.65 0.11
 1 6 2 1.61 0.11
 -1 6 -2 1.59 0.1
 1 -6 2 1.57 0.11
 1 -6 2 1.59 0.11
 -1 6 -3 3.59 0.22
 1 6 3 3.72 0.24
 1 6 3 3.67 0.24
 1 6 3 3.63 0.23
 1 -6 3 3.99 0.25
 1 -6 3 3.79 0.24
 1 6 4 24.08 1.38
 1 6 4 24.37 1.42
 1 -6 4 20.27 1.44
 -1 -6 -4 26.56 1.44
 1 6 5 3.23 0.22
 1 6 5 3.26 0.21
 1 -6 5 3.22 0.22
 1 -6 5 3.19 0.23
 -1 -6 -5 3.36 0.23
 1 6 6 14.54 0.88
 1 6 6 14.1 0.87
 1 -6 6 15.73 0.88
 -1 -6 -6 14.34 0.91
 1 6 7 6.94 0.45
 -1 6 -7 7 0.47
 1 -6 7 7.02 0.45
 -1 -6 -7 7.41 0.47
 1 6 8 0.02 0.03
 -1 6 -8 0.01 0.04
 -1 -6 -8 0 0.04
 1 -6 8 0.03 0.03
 1 6 9 0.21 0.1
 -1 6 -9 0.23 0.11
 -1 -6 -9 0.1 0.05
 1 -6 9 0.15 0.1
 1 6 10 0.27 0.11
 -1 6 -10 0.51 0.14
 -1 -6 -10 0.34 0.13
 1 -6 10 0.27 0.12
 1 7 -11 0.33 0.15
 1 -7 -11 0.02 0.06
 -1 -7 11 0.15 0.11
 1 -7 -11 0 0.05
 1 7 -10 0.03 0.05
 -1 7 10 -0.01 0.04
 -1 -7 10 0 0.03
 1 -7 -10 0.16 0.13
 1 -7 -10 -0.05 0.04
 -1 7 9 0.05 0.04
 1 7 -9 0.05 0.04
 -1 -7 9 0.15 0.08
 1 -7 -9 0.2 0.1
 1 -7 -9 0.03 0.04
 -1 7 8 1.57 0.15
 1 7 -8 1.38 0.15
 -1 -7 8 1.48 0.14
 1 -7 -8 1.64 0.15
 1 -7 -8 1.68 0.16
 1 7 -7 4 0.32
 -1 7 7 4.79 0.31
 -1 7 7 4.99 0.3
 1 -7 -7 4.77 0.32
 -1 -7 7 4.36 0.3
 1 -7 -7 5.06 0.32
 -1 7 6 2.4 0.18
 1 7 -6 2.44 0.19
 -1 7 6 2.56 0.17
 1 -7 -6 2.46 0.18
 -1 -7 6 2.41 0.18
 1 -7 -6 2.6 0.18
 1 7 -5 1.61 0.15
 -1 7 5 2.25 0.15
 -1 7 5 2.25 0.14
 1 -7 -5 2.14 0.15
 -1 -7 5 1.65 0.14
 1 -7 -5 2.21 0.15
 1 7 -4 31.63 1.94
 -1 7 4 32.99 1.9
 1 -7 -4 31.5 1.93
 -1 -7 4 32.08 1.85
 1 -7 -4 32.39 1.85
 1 7 -3 3.33 0.2
 1 7 -3 3.47 0.21
 -1 7 3 3.2 0.21
 1 -7 -3 3.09 0.21
 1 -7 -3 3.06 0.21
 -1 -7 3 3.42 0.2
 1 7 -2 0 0
 1 7 -2 0.05 0.02
 -1 7 2 0 0.01
 1 -7 -2 0.01 0.01
 1 -7 -2 0.01 0.01
 -1 -7 2 0.01 0.01
 1 7 -1 199.26 11.9
 1 7 -1 193.88 12.08
 -1 7 1 206.6 11.9
 -1 -7 1 190.57 11.52
 1 -7 -1 208.54 12.09
 1 -7 -1 215.09 11.56
 -1 7 0 56.18 3.33
 1 7 0 55.36 3.38
 1 7 0 56.26 3.33
 -1 -7 0 57.04 3.23
 1 -7 0 57.58 3.24
 1 -7 0 57.61 3.39
 1 7 1 9.87 0.65
 1 7 1 9.95 0.65
 -1 7 -1 13.63 0.65
 -1 -7 -1 10.04 0.63
 1 7 2 1.88 0.14
 1 7 2 2.21 0.14
 1 7 2 2.13 0.13
 -1 7 -2 2.09 0.13
 1 -7 2 2.07 0.14
 -1 -7 -2 2.22 0.14
 1 -7 2 2.14 0.14
 1 7 3 41.36 2.58
 -1 7 -3 44.08 2.56
 1 7 3 41.33 2.5
 1 -7 3 44.98 2.63
 1 -7 3 46.7 2.51
 1 7 4 12.17 0.73
 1 7 4 12.62 0.75
 1 -7 4 12.22 0.74
 -1 -7 -4 12.58 0.77
 1 -7 4 12.87 0.77
 1 7 5 0.79 0.09
 1 7 5 0.68 0.07
 1 -7 5 0.91 0.09
 1 -7 5 0.91 0.09
 1 7 6 3.41 0.24
 1 7 6 3.73 0.24
 1 -7 6 3.5 0.24
 -1 -7 -6 3.39 0.25
 1 7 7 2.06 0.17
 -1 -7 -7 2 0.17
 -1 7 -8 0.03 0.04
 1 7 8 0.03 0.03
 1 -7 8 0.03 0.03
 -1 -7 -8 0.17 0.1
 1 7 9 1.19 0.15
 -1 7 -9 1.31 0.16
 -1 -7 -9 1.36 0.16
 1 -7 9 1.43 0.15
 1 7 10 0.56 0.13
 -1 7 -10 0.67 0.15
 -1 -7 -10 0.25 0.13
 1 -7 10 0.66 0.12
 1 8 -11 0.6 0.15
 1 -8 -11 0.46 0.14
 1 -8 -11 0.51 0.16
 -1 -8 11 0.58 0.13
 1 8 -10 0.09 0.06
 1 -8 -10 0.39 0.11
 -1 -8 10 0.13 0.1
 1 -8 -10 0.11 0.06
 -1 8 9 0.02 0.03
 1 8 -9 0.03 0.04
 -1 -8 9 0 0.03
 1 -8 -9 -0.01 0.04
 1 -8 -9 0.03 0.04
 -1 8 8 0.03 0.03
 1 8 -8 0.19 0.09
 1 -8 -8 0.04 0.04
 1 -8 -8 0.12 0.08
 -1 -8 8 0.05 0.03
 1 8 -7 1.41 0.13
 -1 8 7 1.2 0.12
 -1 8 7 1.21 0.11
 -1 -8 7 1.33 0.12
 1 -8 -7 1.31 0.12
 1 -8 -7 1.36 0.13
 1 8 -6 1.43 0.13
 -1 -8 6 1.29 0.12
 1 8 -5 2.71 0.2
 -1 8 5 2.72 0.18
 1 -8 -5 2.74 0.19
 -1 -8 5 2.78 0.18
 1 -8 -5 2.72 0.19
 -1 8 4 2.17 0.15
 1 -8 -4 2.17 0.15
 1 -8 -4 2.1 0.15
 1 8 -3 0.15 0.02
 -1 8 3 0.27 0.04
 1 8 -3 0.18 0.04
 1 -8 -3 0.17 0.03
 1 -8 -3 0.17 0.04
 -1 -8 3 0.22 0.03
 1 8 -2 20.41 1.31
 1 8 -2 20.96 1.29
 -1 8 2 22.47 1.29
 -1 -8 2 20.75 1.25
 1 -8 -2 22.79 1.26
 1 -8 -2 23.38 1.31
 -1 8 1 32.47 1.89
 1 8 -1 31.85 1.92
 1 8 -1 32.21 1.89
 1 -8 -1 32.15 1.84
 1 -8 -1 31.17 1.92
 -1 -8 1 32.54 1.83
 -1 8 0 23.94 1.43
 1 -8 0 24.34 1.39
 1 -8 0 24.35 1.45
 -1 8 -1 9.14 0.54
 1 8 1 9.08 0.54
 1 8 1 8.69 0.54
 -1 -8 -1 8.8 0.52
 1 -8 1 9.17 0.53
 1 -8 1 8.97 0.55
 -1 8 -2 28.37 1.75
 1 8 2 30.68 1.76
 -1 -8 -2 31.97 1.71
 1 -8 2 29.03 1.79
 1 -8 2 28.77 1.71
 -1 8 -3 0.03 0.02
 1 8 3 0.06 0.03
 1 8 3 0.07 0.04
 -1 -8 -3 0.16 0.04
 1 -8 3 0.05 0.03
 1 -8 3 0.13 0.04
 -1 -8 -3 0.01 0.01
 1 8 4 1.34 0.11
 1 8 4 1.34 0.11
 -1 -8 -4 1.43 0.11
 1 8 5 20.94 1.24
 1 8 5 21.67 1.27
 1 -8 5 21.37 1.25
 1 -8 5 21.21 1.3
 -1 -8 -5 21.35 1.3
 1 8 6 1.46 0.14
 1 8 6 1.64 0.13
 1 -8 6 2 0.14
 -1 -8 -6 1.44 0.14
 -1 8 -7 1.23 0.13
 1 8 7 1.17 0.11
 1 8 7 1.24 0.13
 -1 -8 -7 1.25 0.13
 1 -8 7 1.14 0.12
 1 8 8 1.79 0.16
 -1 8 -8 1.44 0.16
 1 -8 8 1.42 0.15
 -1 -8 -8 1.77 0.16
 -1 8 -9 0.13 0.11
 1 8 9 0.15 0.1
 1 -8 9 0.04 0.04
 -1 -8 -9 0.05 0.05
 -1 8 -10 0.24 0.13
 -1 -8 -10 0.04 0.05
 1 -8 10 0.29 0.12
 1 9 -11 1.93 0.22
 -1 -9 11 1.8 0.18
 1 -9 -11 1.62 0.2
 1 -9 -11 1.45 0.2
 1 9 -10 0 0.05
 1 -9 -10 -0.01 0.05
 -1 -9 10 0.02 0.03
 1 -9 -10 0.23 0.13
 1 9 -9 1.24 0.15
 -1 -9 9 1.01 0.13
 1 -9 -9 1.42 0.15
 1 -9 -9 1.12 0.15
 1 9 -8 1.4 0.15
 -1 -9 8 1.36 0.14
 1 -9 -8 1.37 0.14
 1 -9 -8 1.42 0.15
 1 9 -7 0.04 0.03
 -1 9 7 0.01 0.01
 1 -9 -7 0.12 0.07
 -1 -9 7 0.1 0.06
 1 -9 -7 0.03 0.03
 -1 9 6 11.7 0.7
 1 9 -6 11.36 0.72
 1 -9 -6 11.19 0.69
 -1 -9 6 11.33 0.68
 1 -9 -6 11.37 0.71
 1 9 -5 6.13 0.4
 -1 9 5 6.05 0.39
 1 -9 -5 5.96 0.38
 -1 -9 5 6.52 0.38
 1 -9 -5 6.25 0.39
 -1 9 4 13.01 0.75
 1 9 -4 12.35 0.77
 1 -9 -4 12.07 0.73
 -1 -9 4 12.66 0.73
 1 -9 -4 12.04 0.76
 -1 -9 4 12.47 0.73
 -1 9 3 0.44 0.05
 1 9 -3 0.38 0.04
 1 9 -3 0.47 0.05
 1 -9 -3 0.48 0.06
 1 -9 -3 0.43 0.05
 -1 -9 3 0.36 0.05
 -1 9 2 15.18 0.92
 1 9 -2 15.06 0.93
 1 9 -2 15.05 0.91
 1 -9 -2 15.45 0.93
 1 -9 -2 15.92 0.89
 -1 -9 2 15.54 0.89
 1 9 -1 10.5 0.66
 -1 9 1 11.97 0.67
 1 9 -1 10.61 0.67
 1 -9 -1 11.62 0.65
 1 -9 -1 11.31 0.67
 -1 -9 1 10.51 0.64
 1 9 0 9.22 0.57
 -1 9 0 9.45 0.57
 1 -9 0 9.62 0.57
 -1 -9 0 9.38 0.55
 1 -9 0 9.41 0.55
 1 9 1 112.82 6.84
 -1 9 -1 112.91 6.83
 -1 -9 -1 115.62 6.64
 -1 -9 -1 125.84 6.95
 1 -9 1 117.44 6.64
 1 -9 1 114.29 6.96
 1 9 2 1.87 0.13
 -1 9 -2 1.92 0.12
 1 -9 2 1.8 0.13
 -1 -9 -2 1.82 0.13
 -1 -9 -2 2.15 0.13
 1 -9 2 1.97 0.13
 -1 9 -3 0.45 0.03
 1 9 3 0.38 0.05
 -1 -9 -3 0.31 0.05
 1 -9 3 0.38 0.05
 1 -9 3 0.42 0.05
 -1 -9 -3 0.34 0.04
 1 9 4 10.05 0.63
 1 9 4 10.31 0.61
 1 -9 4 10.49 0.65
 1 -9 4 10.42 0.62
 -1 -9 -4 10.7 0.62
 -1 -9 -4 10.16 0.64
 1 9 5 1.2 0.11
 1 9 5 1.37 0.12
 -1 -9 -5 1.51 0.12
 1 -9 5 1.5 0.12
 1 -9 5 1.61 0.13
 -1 -9 -5 1.19 0.12
 -1 9 -6 0.32 0.08
 1 9 6 0.2 0.06
 1 9 6 0.05 0.03
 1 -9 6 0.09 0.06
 -1 -9 -6 0.16 0.07
 1 9 7 1.09 0.1
 -1 9 -7 1.06 0.13
 1 9 7 1.07 0.12
 -1 -9 -7 0.97 0.12
 1 -9 7 0.9 0.11
 -1 9 -8 0 0.04
 1 9 8 0.01 0.03
 -1 -9 -8 0.12 0.09
 -1 -9 -8 0.15 0.09
 1 9 9 0.03 0.04
 -1 9 -9 0.03 0.05
 -1 -9 -9 0.08 0.05
 -1 -9 -9 0.16 0.1
 1 -9 9 0.02 0.04
 1 9 10 0.52 0.13
 -1 9 -10 0.68 0.15
 -1 -9 -10 0.66 0.16
 1 -9 10 0.6 0.13
 -1 -9 -10 0.62 0.14
 1 10 -11 0.3 0.15
 1 -10 -11 0.28 0.14
 -1 -10 11 0.31 0.11
 1 -10 -11 0.22 0.14
 1 10 -10 0.92 0.16
 -1 -10 10 0.97 0.14
 1 -10 -10 1.19 0.16
 1 -10 -10 1.23 0.15
 1 10 -9 0.15 0.1
 1 -10 -9 0.15 0.1
 1 -10 -9 0.07 0.05
 -1 -10 9 0.06 0.03
 1 10 -8 3.95 0.27
 -1 10 8 3.04 0.24
 -1 -10 8 4.06 0.25
 1 -10 -8 3.02 0.25
 1 -10 -8 3.18 0.26
 -1 10 7 2.54 0.18
 1 10 -7 2.23 0.19
 1 -10 -7 2.2 0.19
 -1 -10 7 2.68 0.18
 1 -10 -7 2.46 0.19
 1 10 -6 0.37 0.08
 -1 10 6 0.22 0.06
 1 -10 -6 0.22 0.06
 1 -10 -6 0.28 0.07
 -1 -10 6 0.21 0.06
 -1 10 5 0.54 0.06
 1 10 -5 0.47 0.07
 1 -10 -5 0.39 0.06
 -1 -10 5 0.36 0.06
 1 -10 -5 0.29 0.07
 1 10 -4 2.77 0.15
 -1 10 4 2.2 0.17
 1 -10 -4 2.3 0.16
 1 -10 -4 2.14 0.16
 1 10 -3 8.05 0.49
 -1 10 3 8.22 0.5
 1 10 -3 8.19 0.5
 1 -10 -3 8.02 0.5
 1 -10 -3 8.32 0.49
 -1 -10 3 8.11 0.48
 1 10 -2 24.7 1.34
 1 10 -2 25.25 1.36
 -1 10 2 20.27 1.34
 -1 -10 2 25.63 1.3
 1 -10 -2 20.01 1.36
 1 -10 -2 19.76 1.3
 -1 10 1 4.29 0.28
 1 10 -1 4.42 0.27
 1 10 -1 4.47 0.27
 1 -10 -1 4.36 0.27
 -1 -10 1 4.37 0.26
 1 -10 -1 4.37 0.27
 1 10 0 56.41 3.5
 -1 10 0 60.73 3.5
 -1 -10 0 57.06 3.39
 1 -10 0 61.7 3.55
 1 -10 0 61.3 3.4
 -1 10 -1 8 0.48
 1 10 1 7.73 0.48
 1 -10 1 7.85 0.48
 1 -10 1 8.04 0.47
 -1 -10 -1 7.75 0.46
 -1 10 -2 1.61 0.1
 1 10 2 1.36 0.11
 1 -10 2 1.59 0.11
 1 -10 2 1.55 0.11
 -1 10 -3 0.02 0.02
 1 10 3 0.05 0.04
 -1 -10 -3 0.01 0.01
 -1 -10 -3 0.06 0.03
 1 -10 3 0 0.01
 1 -10 3 0.01 0.01
 1 10 4 1.64 0.12
 -1 -10 -4 1.72 0.13
 -1 -10 -4 1.83 0.12
 1 -10 4 1.17 0.12
 1 10 5 -0.02 0.02
 -1 -10 -5 0.08 0.05
 -1 -10 -5 0.02 0.02
 1 -10 5 0.09 0.05
 1 -10 5 0.07 0.06
 -1 10 -6 3.45 0.27
 1 10 6 3.8 0.26
 1 10 6 3.98 0.26
 1 -10 6 3.71 0.26
 -1 -10 -6 4.13 0.27
 -1 -10 -6 4.25 0.27
 1 10 7 0 0.01
 1 10 7 0.01 0.03
 -1 10 -7 0.02 0.03
 -1 -10 -7 0.04 0.03
 1 -10 7 0.01 0.03
 -1 -10 -7 -0.02 0.03
 -1 10 -8 0.42 0.12
 1 10 8 0.56 0.11
 -1 -10 -8 0.65 0.11
 -1 -10 -8 0.56 0.12
 1 -10 8 0.42 0.11
 1 10 9 0.18 0.11
 -1 10 -9 0.02 0.05
 1 -10 9 0.04 0.04
 -1 -10 -9 0.04 0.05
 -1 -10 -9 0.21 0.11
 -1 10 -10 0.46 0.15
 1 -10 10 0.46 0.13
 -1 -10 -10 0.66 0.15
 -1 -10 -10 0.69 0.14
 1 11 -11 0.75 0.16
 1 -11 -11 0.64 0.17
 -1 -11 11 0.75 0.12
 1 -11 -11 0.51 0.14
 1 11 -10 0.02 0.05
 1 -11 -10 0.08 0.05
 1 -11 -10 0.01 0.05
 -1 -11 10 0.02 0.04
 1 11 -9 0.04 0.05
 1 -11 -9 -0.02 0.04
 1 -11 -9 0.03 0.04
 -1 -11 9 -0.01 0.03
 1 11 -8 4.56 0.33
 -1 11 8 4.32 0.3
 1 -11 -8 4.51 0.32
 -1 -11 8 4.45 0.31
 1 -11 -8 4.91 0.32
 1 11 -7 1.36 0.13
 -1 11 7 1.05 0.11
 1 -11 -7 1.01 0.12
 1 -11 -7 1.13 0.13
 -1 -11 7 1.56 0.12
 1 11 -6 3.73 0.27
 -1 11 6 3.84 0.26
 1 -11 -6 3.74 0.26
 -1 -11 6 4 0.25
 1 -11 -6 3.67 0.26
 -1 11 5 9.27 0.59
 1 11 -5 10.31 0.6
 1 -11 -5 9 0.57
 1 -11 -5 8.82 0.59
 -1 -11 5 10.25 0.57
 -1 11 4 17.22 1.04
 1 11 -4 17.24 1.03
 1 11 -4 17.68 1.06
 -1 -11 4 17.86 1.01
 1 -11 -4 17 1.02
 1 -11 -4 17.31 1.05
 1 11 -3 0.11 0.04
 1 11 -3 0.09 0.03
 -1 11 3 0.21 0.04
 -1 -11 3 0.05 0.03
 1 -11 -3 0.3 0.05
 1 -11 -3 0.14 0.03
 1 11 -2 1.89 0.13
 -1 11 2 2.01 0.14
 1 11 -2 1.91 0.13
 1 -11 -2 1.99 0.13
 1 -11 -2 1.88 0.13
 -1 -11 2 1.85 0.13
 -1 11 1 2.51 0.17
 1 11 -1 2.57 0.15
 1 11 -1 2.4 0.16
 1 -11 -1 2.47 0.16
 -1 -11 1 2.48 0.15
 1 -11 -1 2.42 0.16
 -1 11 0 0 0.01
 1 11 0 0 0.01
 1 -11 0 0.04 0.02
 1 -11 0 0 0.01
 -1 -11 0 0.05 0.02
 -1 11 -1 4.12 0.26
 1 -11 1 4.21 0.26
 1 -11 1 4.18 0.26
 -1 11 -2 1.58 0.11
 1 11 2 1.74 0.12
 1 -11 2 1.6 0.12
 -1 -11 -2 1.45 0.1
 1 -11 2 1.62 0.12
 -1 -11 -2 1.62 0.11
 -1 11 -3 8.88 0.5
 1 11 3 7.86 0.51
 1 -11 3 8.61 0.5
 -1 -11 -3 7.88 0.51
 -1 -11 -3 8 0.5
 1 -11 3 8.72 0.52
 1 11 4 2.2 0.16
 1 -11 4 2.01 0.15
 -1 -11 -4 2.1 0.15
 1 -11 4 2.21 0.16
 -1 -11 -4 2.11 0.15
 1 11 5 8.61 0.57
 1 -11 5 10.25 0.58
 1 -11 5 10.1 0.56
 -1 -11 -5 8.43 0.55
 -1 -11 -5 8.45 0.57
 -1 11 -6 0.3 0.08
 1 11 6 0.35 0.07
 -1 -11 -6 0.4 0.08
 -1 -11 -6 0.35 0.08
 1 -11 6 0.27 0.08
 -1 11 -7 0.86 0.12
 1 11 7 0.96 0.1
 1 11 7 1 0.11
 -1 -11 -7 0.86 0.11
 -1 -11 -7 0.81 0.12
 1 -11 7 0.9 0.12
 1 11 8 0.04 0.03
 -1 11 -8 0.21 0.1
 -1 -11 -8 0.14 0.09
 1 -11 8 0.05 0.03
 -1 -11 -8 0.06 0.04
 -1 11 -9 2.33 0.22
 -1 -11 -9 2.01 0.2
 1 -11 9 2.31 0.2
 -1 -11 -9 2.38 0.22
 -1 11 -10 0.56 0.16
 -1 -11 -10 0.2 0.14
 1 -11 10 0.39 0.12
 1 12 -11 0.02 0.06
 -1 -12 11 -0.05 0.03
 1 -12 -11 -0.08 0.05
 1 12 -10 0.21 0.14
 1 -12 -10 0.16 0.11
 1 -12 -10 0.16 0.06
 -1 -12 10 0.23 0.11
 1 12 -9 0.01 0.04
 -1 -12 9 0.01 0.03
 1 -12 -9 0 0.04
 1 -12 -9 0.04 0.04
 -1 12 8 0.13 0.06
 1 12 -8 0.13 0.09
 -1 -12 8 0.15 0.08
 1 -12 -8 0.06 0.04
 1 -12 -8 0 0.03
 -1 12 7 7.19 0.46
 1 12 -7 6.98 0.48
 1 -12 -7 7.5 0.47
 1 -12 -7 7.29 0.47
 -1 -12 7 7.54 0.46
 1 12 -6 0.77 0.1
 -1 12 6 0.66 0.08
 1 -12 -6 0.51 0.08
 1 -12 -6 0.55 0.08
 -1 -12 6 0.83 0.08
 -1 12 5 2.12 0.16
 1 12 -5 2.23 0.17
 1 -12 -5 1.98 0.16
 1 -12 -5 2.06 0.15
 -1 -12 5 2.17 0.15
 1 12 -4 11.01 0.65
 1 12 -4 11.31 0.67
 -1 12 4 10.29 0.66
 1 -12 -4 10.71 0.67
 -1 -12 4 11.38 0.64
 1 -12 -4 10.45 0.65
 1 12 -3 14.08 0.83
 -1 12 3 14.04 0.85
 1 12 -3 14.13 0.85
 1 -12 -3 13.89 0.85
 -1 -12 3 14.08 0.82
 1 -12 -3 13.76 0.82
 -1 12 2 1.48 0.1
 1 12 -2 1.1 0.09
 1 12 -2 0.98 0.08
 1 -12 -2 1.47 0.1
 -1 -12 2 1.02 0.08
 1 12 -1 26.07 1.57
 -1 12 1 26.47 1.56
 1 12 -1 26.29 1.56
 -1 -12 1 26.65 1.51
 1 -12 -1 26.95 1.52
 1 -12 -1 25.45 1.58
 1 12 0 29.71 1.57
 -1 12 0 24.59 1.56
 -1 -12 0 28.98 1.52
 1 -12 0 24.3 1.52
 1 -12 0 24.54 1.58
 -1 12 -1 0.26 0.04
 1 12 1 0.22 0.04
 -1 -12 -1 0.25 0.04
 1 -12 1 0.22 0.05
 1 -12 1 0.21 0.03
 -1 12 -2 17.96 0.96
 1 12 2 14.56 0.97
 -1 -12 -2 14.2 0.97
 1 -12 2 18.25 0.99
 -1 -12 -2 15.04 0.94
 1 -12 2 17.34 0.95
 1 12 3 4.6 0.3
 -1 12 -3 4.54 0.28
 -1 -12 -3 4.61 0.29
 -1 -12 -3 4.66 0.29
 1 -12 3 4.79 0.3
 1 -12 3 4.56 0.29
 1 12 4 1.85 0.14
 -1 -12 -4 1.88 0.14
 -1 -12 -4 1.93 0.14
 1 12 5 9.25 0.57
 1 -12 5 8.6 0.55
 -1 -12 -5 9.2 0.55
 1 -12 5 8.88 0.57
 -1 -12 -5 9.25 0.57
 -1 12 -6 0.22 0.08
 1 12 6 0.33 0.07
 -1 -12 -6 0.24 0.08
 -1 -12 -6 0.37 0.07
 1 -12 6 0.2 0.08
 1 12 7 1.32 0.12
 -1 12 -7 1.31 0.15
 -1 -12 -7 1.22 0.14
 1 -12 7 1.26 0.14
 -1 -12 -7 1.37 0.13
 -1 12 -8 0.03 0.04
 -1 -12 -8 0.13 0.09
 -1 -12 -8 0.02 0.04
 1 -12 8 0.05 0.04
 -1 12 -9 0.01 0.05
 -1 -12 -9 0.18 0.12
 1 -12 9 0.16 0.1
 -1 12 -10 0.17 0.14
 -1 -12 -10 0.01 0.05
 1 -12 10 0.04 0.04
 1 13 -10 0 0.05
 -1 -13 10 0.02 0.04
 1 -13 -10 0.01 0.05
 1 13 -9 0.81 0.13
 1 -13 -9 0.91 0.14
 1 -13 -9 0.91 0.12
 -1 -13 9 0.64 0.11
 1 13 -8 -0.02 0.04
 -1 13 8 0.01 0.02
 1 -13 -8 -0.01 0.03
 1 -13 -8 -0.01 0.03
 -1 -13 8 -0.04 0.02
 1 13 -7 1.11 0.12
 -1 13 7 0.9 0.1
 1 -13 -7 0.84 0.11
 -1 -13 7 1.03 0.11
 1 -13 -7 0.91 0.1
 -1 13 6 0.08 0.06
 1 13 -6 0.05 0.03
 1 -13 -6 0.19 0.07
 -1 -13 6 0.13 0.06
 1 -13 -6 0.17 0.06
 1 13 -5 3.96 0.31
 -1 13 5 4.89 0.31
 1 -13 -5 5.23 0.31
 1 -13 -5 5.22 0.31
 -1 -13 5 4.19 0.3
 1 13 -4 3.19 0.2
 1 13 -4 3.34 0.22
 -1 13 4 3.26 0.22
 -1 -13 4 3.42 0.21
 1 -13 -4 3.15 0.22
 1 -13 -4 3.15 0.21
 1 13 -3 2.04 0.13
 -1 13 3 1.42 0.13
 1 13 -3 1.94 0.12
 1 -13 -3 1.43 0.11
 -1 -13 3 2 0.12
 1 -13 -3 1.47 0.13
 -1 13 2 3.2 0.22
 1 13 -2 3.27 0.21
 1 13 -2 3.29 0.21
 1 -13 -2 3.29 0.21
 -1 -13 2 3.39 0.2
 1 -13 -2 3.13 0.2
 -1 13 0 22.66 1.35
 1 13 0 22.52 1.35
 1 -13 0 22.75 1.36
 -1 -13 0 22.26 1.3
 1 -13 0 23.08 1.31
 -1 13 -1 0.32 0.04
 1 -13 1 0.33 0.04
 1 -13 1 0.26 0.05
 -1 13 -2 2.97 0.19
 1 13 2 2.79 0.2
 1 -13 2 2.9 0.19
 -1 -13 -2 2.75 0.18
 1 -13 2 2.89 0.19
 -1 -13 -2 3 0.19
 1 13 3 8.33 0.51
 -1 13 -3 7.66 0.49
 1 -13 3 7.76 0.51
 -1 -13 -3 8.8 0.5
 -1 -13 -3 8.87 0.49
 1 -13 3 7.56 0.49
 1 13 4 7.16 0.47
 -1 -13 -4 7.35 0.45
 -1 -13 -4 7.37 0.46
 1 -13 4 7.52 0.46
 1 -13 4 7.48 0.47
 1 13 5 1.62 0.13
 1 -13 5 1.25 0.13
 -1 -13 -5 1.59 0.13
 -1 -13 -5 1.68 0.12
 1 -13 5 1.25 0.13
 -1 13 -6 0 0.03
 1 13 6 0.03 0.02
 -1 -13 -6 0.05 0.03
 -1 -13 -6 0.04 0.03
 1 -13 6 0.1 0.07
 -1 13 -7 7.22 0.45
 1 13 7 6.09 0.43
 1 -13 7 7.31 0.44
 -1 -13 -7 6.42 0.44
 -1 -13 -7 6.27 0.43
 -1 13 -8 0.06 0.05
 -1 -13 -8 0.22 0.1
 1 -13 8 0.04 0.04
 -1 13 -9 0.07 0.06
 -1 -13 -9 0 0.04
 1 -13 9 0 0.03
 -1 13 -10 0.55 0.16
 -1 -13 -10 0.52 0.15
 1 -13 10 0.58 0.13
 1 14 -10 0.15 0.12
 -1 -14 10 -0.02 0.03
 1 -14 -10 0.02 0.05
 1 14 -9 -0.05 0.04
 -1 -14 9 0.03 0.03
 1 -14 -9 0.03 0.04
 -1 14 8 0.01 0.02
 1 14 -8 0.01 0.04
 -1 -14 8 0.01 0.03
 1 -14 -8 0.03 0.03
 -1 14 7 0.97 0.1
 1 14 -7 0.76 0.12
 1 -14 -7 0.76 0.1
 -1 -14 7 0.77 0.1
 1 -14 -7 0.83 0.11
 -1 14 6 1.29 0.12
 1 14 -6 1.17 0.13
 -1 -14 6 1.28 0.11
 1 -14 -6 1.17 0.11
 1 -14 -6 1.27 0.12
 1 14 -5 11.74 0.72
 -1 14 5 11.34 0.71
 -1 -14 5 11.58 0.69
 1 -14 -5 11.84 0.71
 1 -14 -5 11.01 0.69
 1 14 -4 1.86 0.12
 1 14 -4 1.84 0.14
 -1 -14 4 1.76 0.13
 1 14 -3 1.55 0.11
 -1 14 3 1.41 0.12
 1 14 -3 1.45 0.11
 1 -14 -3 1.43 0.1
 -1 -14 3 1.51 0.11
 1 -14 -3 1.54 0.12
 1 14 -2 0.46 0.05
 -1 14 2 0.25 0.05
 1 -14 -2 0.28 0.05
 1 -14 -2 0.25 0.03
 1 14 -1 5.06 0.31
 -1 14 1 5.02 0.32
 1 14 -1 5.18 0.32
 1 -14 -1 5.03 0.31
 1 -14 -1 5.19 0.32
 -1 -14 1 5.15 0.31
 -1 14 0 0.58 0.07
 1 14 0 0.83 0.07
 1 -14 0 0.61 0.05
 1 -14 0 0.66 0.07
 -1 -14 0 0.9 0.06
 -1 14 -1 1.47 0.11
 1 14 1 1.42 0.11
 1 -14 1 1.36 0.1
 1 -14 1 1.44 0.11
 -1 -14 -1 1.43 0.1
 -1 14 -2 1.31 0.1
 1 14 2 1.42 0.11
 -1 -14 -2 1.47 0.1
 1 -14 2 1.26 0.1
 1 -14 2 1.28 0.11
 1 14 3 0.31 0.06
 -1 14 -3 0.24 0.04
 -1 -14 -3 0.25 0.03
 -1 -14 -3 0.21 0.05
 1 -14 3 0.19 0.05
 1 -14 3 0.17 0.05
 1 14 4 0.09 0.06
 1 -14 4 0.02 0.02
 -1 -14 -4 0.07 0.04
 1 -14 4 0.02 0.02
 -1 -14 -4 0.01 0.02
 1 14 5 1.19 0.12
 -1 -14 -5 1.12 0.12
 1 -14 5 1.34 0.12
 1 -14 5 1.16 0.11
 -1 -14 -5 1.28 0.11
 1 14 6 0.09 0.07
 -1 14 -6 0.24 0.09
 1 -14 6 0.09 0.04
 -1 -14 -6 0.2 0.08
 1 14 7 0.32 0.08
 -1 14 -7 0.41 0.1
 -1 -14 -7 0.26 0.09
 1 -14 7 0.38 0.1
 -1 14 -8 0.16 0.11
 1 -14 8 0.19 0.1
 -1 -14 -8 0.28 0.11
 -1 14 -9 0.44 0.14
 -1 -14 -9 0.33 0.12
 1 -14 9 0.29 0.11
 -1 14 -10 0.06 0.07
 1 -14 10 0.05 0.05
 -1 -14 -10 0.04 0.05
 1 15 -10 0.01 0.05
 1 -15 -10 0.03 0.05
 -1 -15 10 -0.02 0.03
 1 15 -9 0.02 0.05
 1 -15 -9 0.03 0.04
 -1 -15 9 0.02 0.03
 -1 15 8 0.15 0.07
 1 15 -8 0.07 0.05
 -1 -15 8 0.16 0.08
 1 -15 -8 0.21 0.09
 -1 15 7 0.66 0.09
 1 15 -7 0.5 0.11
 1 -15 -7 0.62 0.1
 -1 -15 7 0.47 0.09
 1 15 -6 0.05 0.03
 -1 15 6 0.02 0.02
 1 -15 -6 0.02 0.03
 1 -15 -6 0.03 0.03
 -1 -15 6 0.04 0.02
 -1 15 5 1.52 0.13
 1 -15 -5 1.47 0.12
 1 -15 -5 1.62 0.14
 1 15 -4 1.62 0.11
 -1 15 4 1.52 0.13
 1 15 -4 1.72 0.13
 1 -15 -4 1.61 0.11
 -1 -15 4 1.64 0.12
 1 -15 -4 1.44 0.13
 -1 15 3 3.64 0.25
 1 15 -3 3.7 0.24
 1 15 -3 3.56 0.23
 -1 -15 3 3.61 0.23
 1 -15 -3 3.59 0.23
 1 -15 -3 3.57 0.24
 1 15 -2 3.54 0.22
 1 15 -2 3.38 0.21
 -1 15 2 3.35 0.23
 -1 -15 2 3.41 0.21
 1 -15 -2 3.27 0.21
 1 -15 -2 3.35 0.22
 1 15 -1 7.13 0.45
 1 15 -1 6.9 0.44
 -1 15 1 7.76 0.46
 1 -15 -1 7.86 0.45
 -1 -15 1 6.75 0.44
 1 -15 -1 7.92 0.45
 1 15 0 0.09 0.04
 -1 15 0 0.02 0.01
 1 -15 0 0.06 0.02
 1 -15 0 0.08 0.04
 -1 -15 0 0.08 0.03
 -1 15 -1 19.31 1.19
 1 15 1 21.08 1.2
 -1 -15 -1 20.73 1.16
 1 -15 1 19.61 1.17
 1 -15 1 19.48 1.21
 1 15 2 1.07 0.09
 -1 15 -2 0.9 0.08
 1 -15 2 0.84 0.08
 -1 -15 -2 0.9 0.08
 1 -15 2 0.95 0.09
 -1 15 -3 2.62 0.17
 1 15 3 2.66 0.19
 1 -15 3 2.76 0.19
 1 -15 3 2.77 0.19
 -1 -15 -3 2.65 0.18
 1 15 4 0.03 0.02
 1 -15 4 0.17 0.06
 -1 -15 -4 0.19 0.06
 1 -15 4 0.07 0.03
 1 15 5 9.03 0.56
 1 -15 5 8.58 0.56
 -1 -15 -5 8.42 0.53
 1 -15 5 8.99 0.54
 1 15 6 0.36 0.09
 -1 15 -6 0.45 0.1
 1 -15 6 0.46 0.09
 -1 -15 -6 0.41 0.09
 -1 15 -7 0.29 0.1
 1 15 7 0.21 0.08
 -1 -15 -7 0.22 0.09
 1 -15 7 0.29 0.09
 -1 15 -8 0.17 0.12
 -1 15 -9 0.84 0.16
 1 -15 9 0.92 0.13
 -1 -15 -9 0.5 0.14
 1 16 -10 0.01 0.05
 1 -16 -10 -0.02 0.04
 -1 -16 10 0 0.03
 1 16 -9 0.29 0.13
 -1 -16 9 0.36 0.1
 1 -16 -9 0.34 0.12
 -1 16 8 0.13 0.07
 1 16 -8 0.13 0.09
 1 -16 -8 0.05 0.04
 -1 -16 8 0.09 0.04
 -1 16 7 0.09 0.07
 1 16 -7 0.06 0.04
 1 -16 -7 0.04 0.03
 -1 -16 7 0.04 0.03
 1 16 -6 0.15 0.08
 -1 16 6 0.1 0.07
 1 -16 -6 0.2 0.08
 -1 -16 6 0.11 0.06
 1 16 -5 0.16 0.06
 -1 16 5 0.13 0.06
 1 -16 -5 0.14 0.07
 -1 -16 5 0.17 0.06
 -1 16 4 2.6 0.21
 1 16 -4 3.07 0.2
 1 16 -4 3.33 0.21
 1 -16 -4 2.92 0.21
 -1 -16 4 3.28 0.21
 1 16 -3 4.23 0.27
 -1 16 3 3.79 0.27
 1 16 -3 4.24 0.26
 -1 -16 3 4.09 0.26
 1 -16 -3 4.25 0.27
 -1 16 2 5.32 0.31
 1 16 -2 4.18 0.29
 1 16 -2 4.03 0.29
 -1 -16 2 3.99 0.28
 1 -16 -2 5.24 0.3
 1 -16 -2 5.32 0.29
 1 16 -1 4.61 0.29
 -1 16 1 4.26 0.29
 1 -16 -1 4.45 0.28
 1 -16 -1 4.5 0.27
 -1 -16 1 4.37 0.27
 -1 16 0 9.13 0.52
 1 16 0 7.57 0.52
 1 -16 0 9.16 0.51
 -1 -16 0 7.68 0.5
 1 -16 0 8.61 0.51
 1 16 1 0.17 0.05
 -1 16 -1 0.06 0.05
 -1 -16 -1 0.17 0.04
 1 -16 1 0.1 0.03
 1 -16 1 0.18 0.05
 -1 16 -2 0.35 0.05
 1 16 2 0.25 0.06
 1 -16 2 0.3 0.05
 -1 -16 -2 0.23 0.05
 1 -16 2 0.34 0.06
 -1 16 -3 2.26 0.15
 1 16 3 2.12 0.17
 1 -16 3 2.15 0.16
 1 -16 3 2.18 0.16
 -1 -16 -3 2.18 0.16
 1 16 4 0.19 0.07
 -1 -16 -4 0.16 0.06
 1 -16 4 0.08 0.06
 1 -16 4 0.13 0.05
 -1 16 -5 0.16 0.08
 1 16 5 0.02 0.02
 1 -16 5 0.03 0.03
 -1 -16 -5 0.01 0.02
 -1 16 -6 0.71 0.11
 1 16 6 0.5 0.1
 -1 -16 -6 0.44 0.09
 1 -16 6 0.69 0.1
 1 16 7 2.05 0.17
 -1 16 -7 2.06 0.19
 -1 -16 -7 1.87 0.17
 1 -16 7 2.12 0.18
 -1 16 -8 0.02 0.05
 1 16 8 0 0.02
 -1 -16 -8 0.17 0.1
 1 -16 8 0.04 0.04
 -1 16 -9 0.04 0.06
 -1 -16 -9 0.04 0.04
 1 -16 9 0.03 0.04
 1 17 -10 0.05 0.06
 -1 -17 10 0.08 0.04
 1 -17 -10 0.09 0.05
 1 17 -9 0.09 0.05
 1 -17 -9 0 0.04
 -1 -17 9 0.06 0.04
 1 17 -8 0.01 0.04
 -1 17 8 0.02 0.02
 1 -17 -8 0.04 0.04
 -1 -17 8 0.01 0.03
 1 17 -7 0.77 0.12
 -1 17 7 0.95 0.11
 -1 -17 7 0.87 0.11
 1 -17 -7 0.92 0.12
 1 17 -6 0.15 0.08
 -1 17 6 0.17 0.07
 -1 -17 6 0.16 0.07
 1 -17 -6 0.15 0.08
 1 17 -5 0.11 0.06
 -1 -17 5 0.12 0.06
 1 -17 -5 0 0.02
 -1 17 4 0.02 0.02
 1 17 -4 0.05 0.02
 1 -17 -4 0.02 0.02
 -1 -17 4 0.13 0.05
 -1 17 3 3 0.24
 1 17 -3 3.9 0.23
 1 17 -3 3.71 0.23
 1 -17 -3 2.93 0.23
 -1 -17 3 3.88 0.23
 -1 17 2 2.4 0.17
 1 17 -2 2.21 0.16
 -1 -17 2 2.26 0.16
 1 -17 -2 2.41 0.17
 -1 17 1 0.14 0.05
 1 17 -1 0.27 0.05
 1 -17 -1 0.17 0.05
 -1 -17 1 0.23 0.05
 -1 17 0 0.27 0.06
 1 17 0 0.24 0.06
 1 -17 0 0.34 0.04
 1 -17 0 0.41 0.06
 -1 -17 0 0.31 0.05
 -1 17 -1 6.29 0.41
 1 17 1 6.96 0.42
 -1 -17 -1 6.64 0.4
 1 -17 1 6.55 0.41
 1 -17 1 6.69 0.41
 -1 17 -2 0 0.01
 1 17 2 0 0.01
 -1 -17 -2 0.02 0.02
 1 -17 2 0 0.01
 1 -17 2 0 0.02
 1 17 3 2.03 0.15
 -1 17 -3 1.54 0.12
 1 -17 3 1.62 0.14
 -1 -17 -3 1.88 0.13
 1 -17 3 1.53 0.13
 1 17 4 0.27 0.07
 -1 -17 -4 0.27 0.07
 1 -17 4 0.19 0.06
 1 -17 4 0.21 0.07
 -1 17 -5 0.27 0.08
 1 17 5 0.19 0.08
 1 -17 5 0.12 0.08
 -1 -17 -5 0.05 0.03
 -1 17 -6 0.25 0.1
 1 17 6 0.31 0.09
 -1 -17 -6 0.15 0.08
 1 -17 6 0.16 0.09
 -1 17 -7 0.8 0.13
 1 17 7 1.11 0.13
 -1 -17 -7 1.21 0.13
 1 -17 7 0.59 0.11
 1 17 8 0 0.02
 -1 17 -8 0.03 0.05
 1 -17 8 0.02 0.04
 -1 -17 -8 0.16 0.1
 -1 17 -9 0.18 0.12
 1 -17 9 0.26 0.11
 -1 -17 -9 0.04 0.04
 1 18 -10 0.65 0.15
 -1 -18 10 0.46 0.11
 1 -18 -10 0.5 0.14
 1 18 -9 0.23 0.11
 1 -18 -9 0.09 0.05
 -1 -18 9 0.27 0.1
 -1 18 8 0.32 0.09
 1 18 -8 0.16 0.1
 1 -18 -8 0.29 0.11
 -1 -18 8 0.2 0.09
 1 18 -7 0.05 0.04
 -1 18 7 0.26 0.08
 -1 -18 7 0.2 0.08
 1 -18 -7 0.23 0.1
 1 18 -6 1.69 0.15
 -1 18 6 1.69 0.15
 1 -18 -6 1.54 0.15
 -1 -18 6 1.93 0.15
 -1 18 5 0.31 0.08
 1 18 -5 0.4 0.07
 -1 -18 5 0.35 0.07
 1 -18 -5 0.24 0.07
 1 18 -4 0.55 0.07
 -1 18 4 0.4 0.08
 -1 -18 4 0.63 0.07
 1 -18 -4 0.34 0.07
 1 18 -3 0.07 0.05
 -1 18 3 0.12 0.06
 1 -18 -3 0.04 0.02
 -1 -18 3 0.05 0.02
 1 18 -2 1.19 0.1
 -1 18 2 1 0.11
 1 -18 -2 1.09 0.1
 -1 -18 2 1.12 0.09
 -1 18 1 0.86 0.09
 1 18 -1 1.07 0.09
 -1 -18 1 0.93 0.08
 1 -18 -1 0.94 0.09
 -1 18 0 1.21 0.11
 1 18 0 1.2 0.11
 1 -18 0 1.35 0.11
 -1 -18 0 1.23 0.1
 1 18 1 0.01 0.01
 -1 18 -1 0.01 0.01
 -1 -18 -1 0.03 0.02
 1 -18 1 0.07 0.05
 1 -18 1 0.02 0.01
 1 18 2 0.67 0.08
 -1 18 -2 0.43 0.06
 -1 -18 -2 0.66 0.07
 1 -18 2 0.42 0.06
 1 -18 2 0.39 0.07
 1 18 3 0.69 0.09
 -1 18 -3 0.74 0.07
 1 -18 3 0.6 0.07
 -1 -18 -3 0.72 0.08
 1 -18 3 0.71 0.09
 1 -18 4 0.56 0.09
 1 -18 4 0.46 0.07
 1 18 5 4.53 0.31
 -1 18 -5 4.13 0.3
 -1 -18 -5 4.3 0.29
 1 -18 5 4.43 0.3
 1 18 6 4.47 0.3
 -1 18 -6 3.82 0.29
 1 -18 6 3.82 0.28
 -1 -18 -6 3.88 0.28
 -1 18 -7 1.37 0.15
 1 18 7 1.14 0.14
 -1 -18 -7 1.18 0.13
 1 -18 7 1.05 0.14
 -1 18 -8 -0.02 0.05
 1 18 8 0.13 0.09
 -1 -18 -8 -0.01 0.04
 1 -18 8 0.01 0.04
 -1 18 -9 0.17 0.14
 1 -18 9 0.22 0.1
 -1 -18 -9 0.03 0.04
 1 19 -9 0.16 0.12
 -1 19 9 0.2 0.11
 1 -19 -9 0.22 0.12
 -1 -19 9 0.14 0.1
 1 19 -8 0.06 0.05
 -1 19 8 0.12 0.09
 1 -19 -8 0.15 0.11
 -1 -19 8 0.05 0.03
 -1 19 7 0.23 0.09
 1 19 -7 0.03 0.04
 -1 -19 7 0.04 0.03
 1 -19 -7 0.05 0.04
 -1 19 6 1.43 0.14
 1 19 -6 1.21 0.13
 1 -19 -6 1.26 0.14
 -1 -19 6 1.27 0.13
 1 19 -5 0.71 0.09
 -1 -19 5 0.73 0.09
 -1 19 4 1.36 0.13
 -1 -19 4 1.39 0.12
 1 -19 -4 1.26 0.12
 -1 19 3 1.22 0.11
 1 19 -3 0.99 0.09
 -1 -19 3 0.93 0.1
 1 -19 -3 1.36 0.11
 -1 19 2 0.37 0.07
 1 19 -2 0.43 0.07
 1 -19 -2 0.33 0.07
 -1 -19 2 0.33 0.06
 1 19 -1 14.84 0.86
 -1 19 1 13.66 0.86
 1 -19 -1 13.6 0.84
 -1 -19 1 14.65 0.83
 1 19 0 1.47 0.12
 -1 19 0 1.31 0.12
 -1 -19 0 1.29 0.11
 1 -19 0 1.36 0.12
 1 19 1 1.34 0.11
 -1 19 -1 0.87 0.1
 -1 -19 -1 1.29 0.1
 1 -19 1 0.91 0.1
 -1 19 -2 0.68 0.08
 1 19 2 0.66 0.09
 1 -19 2 0.57 0.06
 1 -19 2 0.65 0.08
 -1 -19 -2 0.68 0.07
 -1 19 -3 6.46 0.41
 1 19 3 6.83 0.44
 1 -19 3 6.81 0.42
 1 -19 3 6.62 0.42
 -1 -19 -3 6.81 0.41
 1 19 4 0.02 0.02
 -1 19 -4 0.1 0.07
 -1 -19 -4 0 0.02
 1 -19 4 0.09 0.07
 1 19 5 4.78 0.3
 -1 19 -5 3.46 0.28
 1 -19 5 3.56 0.28
 -1 -19 -5 4.36 0.28
 -1 19 -6 0.02 0.04
 1 19 6 0.02 0.02
 1 -19 6 0.01 0.03
 -1 -19 -6 0.03 0.03
 1 19 7 1.14 0.15
 -1 19 -7 1.56 0.16
 -1 -19 -7 1.31 0.15
 1 -19 7 1.64 0.16
 -1 19 -8 0.05 0.05
 1 19 8 0.02 0.02
 -1 -19 -8 0.01 0.04
 1 -19 8 0.03 0.04
 -1 19 -9 0.52 0.15
 -1 -19 -9 0.45 0.13
 1 -19 9 0.43 0.12
 -1 20 9 0.03 0.03
 1 20 -9 0.03 0.05
 -1 -20 9 0.03 0.04
 1 -20 -9 0.01 0.04
 -1 20 8 0.19 0.1
 1 20 -8 0.31 0.11
 1 -20 -8 0.32 0.11
 -1 -20 8 0.36 0.09
 -1 20 7 1.35 0.15
 1 20 -7 1.28 0.14
 1 -20 -7 1.22 0.14
 -1 -20 7 1.27 0.13
 -1 20 6 1.15 0.13
 -1 -20 6 0.86 0.11
 1 -20 -6 1.38 0.13
 -1 20 5 5.5 0.38
 1 -20 -5 5.48 0.36
 -1 -20 5 5.71 0.36
 -1 20 4 5.62 0.37
 -1 -20 4 5.11 0.35
 1 -20 -4 5.9 0.36
 1 20 -3 2.86 0.2
 -1 20 3 2.89 0.22
 -1 -20 3 2.99 0.2
 1 -20 -3 2.92 0.21
 -1 20 2 7.9 0.51
 1 20 -2 8.05 0.5
 -1 -20 2 8.28 0.49
 1 -20 -2 7.97 0.49
 -1 20 1 0.25 0.08
 1 20 -1 0.38 0.07
 -1 -20 1 0.35 0.06
 1 -20 -1 0.32 0.07
 1 20 0 0.59 0.08
 -1 20 0 0.76 0.09
 -1 -20 0 0.58 0.07
 1 -20 0 0.9 0.09
 1 20 1 12.41 0.76
 -1 20 -1 11.96 0.75
 -1 -20 -1 11.7 0.72
 1 -20 1 12.97 0.74
 1 20 2 1.17 0.12
 -1 -20 -2 1.24 0.1
 1 20 3 1.41 0.13
 1 -20 3 1.16 0.1
 1 -20 3 1.14 0.11
 -1 -20 -3 1.1 0.11
 -1 20 -4 0.3 0.08
 1 20 4 0.29 0.09
 -1 -20 -4 0.23 0.07
 1 -20 4 0.47 0.08
 1 20 5 0.15 0.09
 -1 20 -5 0.01 0.03
 -1 -20 -5 0.11 0.08
 1 -20 5 0.02 0.03
 1 20 6 1.66 0.17
 -1 20 -6 1.63 0.16
 1 -20 6 1.96 0.17
 -1 -20 -6 1.51 0.15
 -1 20 -7 0.25 0.11
 -1 -20 -7 0.22 0.09
 1 -20 7 0.15 0.1
 -1 20 -8 0.07 0.05
 1 20 8 0.17 0.1
 1 -20 8 0.03 0.04
 -1 -20 -8 0.05 0.04
 -1 21 9 0.25 0.11
 -1 -21 9 0.4 0.11
 1 -21 -9 0.36 0.13
 -1 21 8 0.01 0.02
 1 -21 -8 0.05 0.04
 -1 -21 8 0.03 0.03
 -1 21 7 0.51 0.12
 1 -21 -7 0.28 0.11
 -1 -21 7 0.44 0.09
 -1 21 6 4.12 0.29
 1 -21 -6 3.97 0.29
 -1 -21 6 3.83 0.27
 -1 21 5 0.42 0.1
 1 -21 -5 0.49 0.1
 -1 -21 5 0.71 0.09
 -1 21 4 0.5 0.09
 1 -21 -4 0.58 0.09
 -1 -21 4 0.53 0.08
 1 21 -3 1.28 0.11
 -1 21 3 1.15 0.12
 1 -21 -3 1.13 0.11
 -1 -21 3 1.05 0.1
 -1 21 2 0.78 0.11
 1 21 -2 0.95 0.1
 1 -21 -2 0.91 0.1
 -1 -21 2 0.97 0.09
 1 21 -1 0.61 0.08
 -1 21 1 0.33 0.08
 -1 -21 1 0.65 0.07
 1 -21 -1 0.35 0.07
 -1 21 0 0.11 0.07
 1 21 0 0.17 0.07
 -1 -21 0 0.16 0.05
 1 -21 0 0.18 0.06
 -1 21 -1 6.35 0.45
 1 21 1 8.02 0.46
 -1 -21 -1 7.63 0.43
 1 -21 1 6.5 0.44
 1 21 2 0.69 0.1
 -1 21 -2 0.7 0.08
 1 -21 2 0.92 0.1
 -1 -21 -2 0.62 0.08
 1 21 3 0.25 0.08
 -1 -21 -3 0.2 0.06
 1 -21 3 0.48 0.08
 1 21 4 0.34 0.1
 -1 -21 -4 0.43 0.08
 1 -21 4 0.42 0.09
 1 21 5 0.31 0.11
 1 -21 5 0.21 0.09
 -1 -21 -5 0.53 0.09
 1 21 6 0.67 0.12
 1 -21 6 0.71 0.12
 -1 -21 -6 0.66 0.11
 -1 21 -7 0.36 0.11
 1 21 7 0.29 0.1
 1 -21 7 0.32 0.11
 -1 -21 -7 0.42 0.1
 -1 21 -8 0.15 0.12
 1 21 8 0 0.03
 1 -21 8 0.16 0.11
 -1 -21 -8 0.04 0.04
 -1 22 9 0 0.03
 1 -22 -9 0.06 0.05
 -1 -22 9 0.2 0.1
 -1 22 8 -0.01 0.02
 -1 -22 8 0.17 0.09
 1 -22 -8 0 0.04
 -1 22 7 0.2 0.1
 1 -22 -7 0.02 0.04
 -1 -22 7 0 0.03
 -1 22 6 3.13 0.25
 1 -22 -6 3.06 0.24
 -1 -22 6 3.44 0.24
 -1 22 5 -0.01 0.02
 1 -22 -5 0.05 0.03
 -1 -22 5 0 0.02
 -1 22 4 6.64 0.44
 -1 -22 4 6.71 0.42
 1 -22 -4 6.73 0.43
 -1 22 3 0.34 0.09
 1 22 -3 0.37 0.07
 -1 -22 3 0.27 0.06
 1 -22 -3 0.29 0.07
 1 22 -2 7.78 0.52
 -1 22 2 9.05 0.54
 1 -22 -2 8.55 0.52
 -1 -22 2 8.27 0.51
 -1 22 1 4.01 0.28
 1 22 -1 4.08 0.28
 1 -22 -1 4.15 0.27
 -1 -22 1 4.08 0.27
 1 22 0 5.34 0.35
 -1 22 0 5.25 0.34
 -1 -22 0 4.98 0.32
 1 -22 0 5.02 0.33
 1 22 1 1.88 0.15
 -1 22 -1 1.55 0.14
 1 -22 1 1.73 0.15
 -1 -22 -1 1.71 0.13
 -1 22 -2 1.19 0.11
 1 22 2 1.16 0.12
 1 -22 2 1.23 0.12
 -1 -22 -2 0.92 0.1
 1 22 3 0.16 0.08
 1 -22 3 0.15 0.07
 -1 -22 -3 0.25 0.07
 1 22 4 0.83 0.13
 -1 -22 -4 0.84 0.1
 1 -22 4 0.83 0.11
 1 22 5 0.02 0.02
 1 -22 5 0.07 0.03
 -1 -22 -5 0.04 0.03
 1 22 6 0.42 0.11
 1 -22 6 0.29 0.1
 -1 -22 -6 0.48 0.1
 1 22 7 0.3 0.11
 1 -22 7 0.23 0.11
 -1 -22 -7 0.22 0.1
 1 22 8 0.79 0.14
 -1 -22 -8 0.84 0.13
 1 -22 8 0.73 0.13
 -1 23 8 0.32 0.11
 1 -23 -8 0.14 0.11
 -1 23 7 0.21 0.1
 -1 -23 7 0.18 0.09
 1 -23 -7 0.2 0.1
 -1 23 6 0.3 0.11
 1 -23 -6 0 0.03
 -1 -23 6 0.04 0.03
 -1 23 5 2.84 0.23
 1 -23 -5 2.7 0.22
 -1 -23 5 2.81 0.21
 -1 23 4 0.42 0.1
 -1 -23 4 0.4 0.08
 1 -23 -4 0.39 0.09
 -1 23 3 0.52 0.09
 1 23 -3 0.55 0.08
 1 -23 -3 0.36 0.08
 -1 -23 3 0.59 0.08
 1 23 -2 0.2 0.07
 -1 23 2 0.16 0.08
 1 -23 -2 0.16 0.07
 -1 -23 2 0.11 0.06
 1 23 -1 0.26 0.08
 -1 23 1 0.27 0.08
 -1 -23 1 0.22 0.06
 1 -23 -1 0.21 0.07
 -1 23 0 0.29 0.07
 1 23 0 0.22 0.08
 1 -23 0 0.23 0.07
 -1 -23 0 0.26 0.06
 1 23 1 0.36 0.09
 -1 23 -1 0.36 0.07
 1 -23 1 0.16 0.07
 -1 -23 -1 0.34 0.07
 1 23 2 0.17 0.09
 -1 23 -2 0.23 0.06
 -1 -23 -2 0.22 0.06
 1 -23 2 0.27 0.07
 1 23 3 0.06 0.02
 -1 -23 -3 0.13 0.06
 1 -23 3 0.15 0.07
 1 23 4 0.32 0.11
 -1 -23 -4 0.2 0.08
 1 -23 4 0.18 0.08
 1 23 5 0.01 0.02
 1 -23 5 0.03 0.03
 -1 -23 -5 0.13 0.08
 1 23 6 0.79 0.13
 1 -23 6 0.68 0.12
 -1 -23 -6 0.68 0.11
 1 23 7 0.15 0.1
 1 -23 7 0.19 0.11
 -1 -23 -7 0.09 0.04
 1 23 8 0.35 0.12
 1 -23 8 0.25 0.12
 -1 24 8 0 0.02
 1 -24 -8 0.02 0.04
 -1 24 7 0.06 0.03
 1 -24 -7 0.04 0.04
 1 -24 -6 0.17 0.09
 -1 24 5 0.14 0.1
 -1 24 4 0.57 0.11
 1 -24 -4 0.61 0.1
 -1 -24 4 0.48 0.08
 -1 24 3 1.45 0.14
 1 24 -3 1.18 0.12
 1 -24 -3 1.22 0.13
 -1 -24 3 1.21 0.11
 1 24 -2 2.4 0.19
 -1 24 2 3.12 0.21
 -1 -24 2 2.18 0.18
 1 -24 -2 2.67 0.19
 -1 24 1 0.33 0.09
 1 24 -1 0.23 0.08
 1 -24 -1 0.31 0.08
 -1 -24 1 0.26 0.07
 -1 24 0 4.23 0.29
 1 24 0 4.27 0.29
 1 -24 0 4.03 0.28
 -1 -24 0 4.07 0.27
 -1 24 -1 0.3 0.08
 1 24 1 0.18 0.09
 -1 -24 -1 0.25 0.06
 1 -24 1 0.2 0.08
 -1 24 -2 0.28 0.07
 1 24 2 0.35 0.09
 -1 -24 -2 0.29 0.06
 1 -24 2 0.26 0.08
 1 24 3 0.23 0.1
 -1 -24 -3 0.25 0.07
 1 -24 3 0.35 0.08
 1 24 4 0.55 0.12
 1 -24 4 0.53 0.09
 -1 -24 -4 0.38 0.08
 1 24 5 0.03 0.03
 1 -24 5 0.06 0.04
 -1 -24 -5 0.03 0.03
 1 24 6 0.36 0.12
 1 -24 6 0.23 0.1
 1 24 7 0.32 0.12
 1 -24 7 0.28 0.11
 -1 25 8 0 0.02
 1 -25 -8 0 0.04
 -1 25 7 0.21 0.11
 1 -25 -7 0.03 0.04
 1 -25 -6 0.23 0.1
 -1 25 5 0.28 0.1
 1 -25 -5 0.32 0.09
 -1 25 4 0.61 0.11
 1 -25 -4 0.57 0.1
 -1 25 3 0.26 0.1
 1 -25 -3 0.4 0.08
 1 25 -2 3.01 0.23
 -1 25 2 3.3 0.25
 1 -25 -2 3.14 0.23
 1 25 -1 0.11 0.08
 -1 25 1 0.01 0.02
 1 -25 -1 0.01 0.03
 1 25 0 0.17 0.09
 -1 25 0 0.26 0.08
 1 -25 0 0.13 0.07
 -1 25 -1 0.01 0.02
 1 25 1 0.14 0.09
 1 -25 1 0.04 0.03
 -1 25 -2 0.08 0.07
 1 25 2 0.02 0.02
 1 -25 2 0.13 0.07
 1 25 3 0.91 0.13
 1 -25 3 0.54 0.1
 1 25 4 0.68 0.12
 1 -25 4 0.58 0.1
 1 25 5 0.03 0.03
 1 -25 5 0.07 0.04
 1 25 6 0 0.02
 1 -25 6 0.02 0.04
 1 25 7 0 0.03
 1 -25 7 0.01 0.04
 -1 26 7 0.18 0.12
 1 -26 -7 0.21 0.11
 -1 26 6 0.4 0.13
 1 -26 -6 0.15 0.1
 -1 26 5 0.01 0.02
 1 -26 -5 0.01 0.03
 -1 26 4 0.92 0.13
 1 -26 -4 0.65 0.11
 -1 26 3 1.09 0.14
 1 -26 -3 1.23 0.13
 1 26 -2 1.36 0.13
 -1 26 2 1.09 0.13
 1 -26 -2 0.85 0.12
 -1 26 1 0.03 0.02
 1 26 -1 0.03 0.02
 1 -26 -1 0.15 0.08
 1 26 0 0.46 0.1
 -1 26 0 0.47 0.09
 1 -26 0 0.6 0.09
 1 26 1 0.01 0.02
 -1 26 -1 0.01 0.02
 1 -26 1 0.02 0.03
 1 26 2 2.07 0.19
 -1 26 -2 1.79 0.16
 1 -26 2 1.73 0.16
 1 26 3 0.75 0.13
 1 -26 3 0.92 0.11
 1 26 4 0.44 0.12
 1 -26 4 0.36 0.09
 1 26 5 1.3 0.16
 1 -26 5 1.35 0.15
 1 26 6 0.02 0.03
 1 -26 6 0.06 0.04
 1 26 7 -0.01 0.02
 1 -26 7 -0.02 0.03
 -1 27 7 0.02 0.03
 1 -27 -7 0.07 0.04
 -1 27 6 0.51 0.13
 1 -27 -6 0.46 0.11
 -1 27 5 0.01 0.03
 1 -27 -5 0.03 0.03
 -1 27 4 -0.01 0.02
 1 -27 -4 -0.02 0.03
 -1 27 3 0.2 0.11
 1 -27 -3 0.03 0.03
 -1 27 2 0.95 0.13
 1 27 -2 0.9 0.11
 1 -27 -2 0.9 0.11
 -1 27 1 0.03 0.02
 1 27 -1 0.02 0.02
 1 -27 -1 0.02 0.03
 1 27 0 0.81 0.12
 -1 27 0 0.63 0.11
 1 -27 0 0.66 0.1
 -1 27 -1 0.67 0.1
 1 27 1 0.68 0.12
 1 -27 1 0.48 0.09
 1 -27 2 0.17 0.08
 1 27 3 0.01 0.02
 1 -27 3 -0.03 0.03
 1 27 4 0.73 0.13
 1 -27 4 0.8 0.12
 1 27 5 0.29 0.12
 1 -27 5 0.49 0.11
 1 27 6 0.02 0.03
 1 -27 6 -0.01 0.04
 -1 28 6 0.96 0.15
 1 -28 -6 0.99 0.13
 -1 28 5 -0.01 0.03
 1 -28 -5 -0.01 0.03
 -1 28 4 0.04 0.03
 1 -28 -4 0.09 0.04
 -1 28 3 0.53 0.13
 1 -28 -3 0.61 0.11
 -1 28 2 0.46 0.13
 1 28 -2 0.58 0.11
 1 -28 -2 0.67 0.1
 1 28 -1 0.01 0.02
 -1 28 1 0.04 0.03
 1 -28 -1 0 0.03
 -1 28 0 0.4 0.1
 1 28 0 0.7 0.12
 1 -28 0 0.51 0.09
 1 28 1 0.03 0.03
 -1 28 -1 0.03 0.02
 1 -28 1 0 0.03
 1 28 2 0.72 0.14
 1 -28 2 0.69 0.11
 1 28 3 0.17 0.12
 1 -28 3 0.19 0.09
 1 28 4 0.44 0.14
 1 -28 4 0.5 0.11
 1 28 5 -0.01 0.03
 1 -28 5 0.03 0.04
 1 28 6 0.32 0.13
 1 -28 6 0.56 0.12
 1 -29 -6 0.19 0.1
 -1 29 5 1.24 0.17
 1 -29 -5 1.1 0.14
 -1 29 4 0.04 0.03
 1 -29 -4 0.09 0.04
 -1 29 3 0.27 0.12
 1 -29 -3 0.36 0.1
 1 29 -2 0.52 0.11
 -1 29 2 0.5 0.12
 1 -29 -2 0.51 0.1
 -1 29 1 0.01 0.02
 1 29 -1 0.01 0.02
 1 -29 -1 0.03 0.03
 1 29 0 0 0.02
 -1 29 0 -0.02 0.02
 1 -29 0 0.01 0.03
 -1 29 -1 0.14 0.09
 1 -29 1 0.23 0.09
 1 -29 2 0.22 0.09
 1 29 3 0 0.03
 1 -29 3 -0.01 0.03
 1 29 4 0.47 0.13
 1 -29 4 0.4 0.11
 1 29 5 0.19 0.12
 1 -29 5 0.03 0.04
 -1 30 5 0.01 0.03
 1 -30 -5 0.04 0.04
 -1 30 4 0 0.03
 1 -30 -4 0 0.03
 -1 30 3 0 0.03
 1 -30 -3 0.02 0.03
 -1 30 2 0.02 0.03
 1 -30 -2 0.12 0.09
 -1 30 1 0.93 0.14
 1 30 -1 1.08 0.14
 1 -30 -1 0.79 0.12
 -1 30 0 0.16 0.11
 1 -30 0 0.34 0.1
 1 30 1 -0.03 0.02
 -1 30 -1 -0.01 0.02
 1 -30 1 0 0.03
 1 30 2 0 0.03
 1 -30 2 0 0.03
 1 30 3 0.03 0.03
 1 -30 3 0.12 0.09
 1 30 4 0.16 0.12
 1 30 5 0.01 0.03
 -1 31 5 0.24 0.13
 -1 31 4 0 0.03
 -1 31 3 0.79 0.16
 -1 31 2 0.36 0.14
 -1 31 1 0.98 0.14
 1 31 -1 0.54 0.13
 -1 31 0 0.42 0.12
 1 31 0 0.6 0.13
 -1 31 -1 0.14 0.11
 1 31 2 0.01 0.03
 1 31 3 0.01 0.03
 1 31 4 0.2 0.12
 -1 32 4 0.18 0.14
 -1 32 3 0.48 0.15
 -1 32 2 0.32 0.13
 -1 32 1 0.18 0.12
 1 32 0 0.59 0.14
 -1 32 0 0.32 0.13
 1 32 1 0.94 0.16
 1 32 2 1.1 0.16
 1 32 3 -0.02 0.02
 -1 33 3 0.77 0.15
 -1 33 2 0.69 0.15
 -1 33 1 0.39 0.13
 1 33 -1 0.18 0.13
 -1 33 0 1.05 0.16
 1 33 0 1.06 0.17
 1 33 1 0.86 0.16
 1 33 2 0.33 0.13
 1 34 -1 0.01 0.03
 -1 34 1 0 0.03
 -1 34 0 0.02 0.03
 1 34 0 0 0.03
 2 0 -12 1.32 0.19
 2 0 -12 0.87 0.18
 -2 0 12 1.05 0.17
 -2 0 11 0.04 0.04
 2 0 -11 -0.03 0.05
 -2 0 10 2.01 0.19
 2 0 -10 1.81 0.2
 2 0 -9 0 0.04
 -2 0 9 0 0.02
 2 0 -8 9.03 0.6
 -2 0 8 9.45 0.57
 2 0 -7 -0.01 0.03
 -2 0 7 0.02 0.02
 -2 0 6 2.67 0.17
 -2 0 6 2.6 0.18
 2 0 -6 2.53 0.19
 -2 0 5 0.02 0.01
 -2 0 5 0 0.01
 2 0 -5 0.09 0.05
 -2 0 4 123.64 6.88
 2 0 -4 119.62 7.22
 -2 0 4 118.96 7.08
 -2 0 3 -0.01 0.01
 -2 0 3 0.02 0.02
 2 0 -3 -0.01 0.01
 -2 0 2 31.36 1.85
 2 0 -2 30.92 1.88
 2 0 -2 31.87 1.8
 2 0 -1 -0.11 0.02
 -2 0 0 258.4 14.64
 2 0 0 250.38 14.21
 2 0 0 239.12 14.9
 2 0 1 -0.03 0.01
 -2 0 -1 -0.04 0
 2 0 2 0.85 0.07
 2 0 2 0.86 0.07
 2 0 2 0.75 0.06
 -2 0 -2 0.77 0.06
 2 0 3 0.01 0.02
 2 0 3 0 0.01
 2 0 3 0 0.01
 2 0 4 1.69 0.13
 2 0 4 1.76 0.12
 2 0 4 1.72 0.13
 -2 0 -5 0.01 0.01
 2 0 5 0 0.01
 2 0 5 0.01 0.02
 2 0 5 0.03 0.02
 2 0 6 5.23 0.33
 2 0 6 4.95 0.34
 2 0 7 0.02 0.03
 -2 0 -7 -0.03 0.03
 -2 0 -8 2.41 0.21
 2 0 8 2.38 0.2
 2 0 9 0.02 0.04
 -2 0 -9 -0.01 0.05
 2 0 10 0.03 0.04
 -2 0 -10 0 0.06
 -2 1 12 1.11 0.17
 2 1 -12 1.22 0.2
 2 -1 -12 1.22 0.19
 -2 -1 12 1.28 0.17
 2 -1 -12 1.11 0.18
 2 1 -11 0.25 0.13
 -2 1 11 0.01 0.04
 -2 -1 11 0.08 0.04
 2 -1 -11 0.03 0.06
 2 1 -10 0.01 0.05
 -2 -1 10 0.21 0.1
 2 -1 -10 0.18 0.11
 -2 1 9 0.04 0.03
 2 1 -9 0.15 0.1
 -2 -1 9 0.03 0.03
 2 -1 -9 0.18 0.1
 -2 1 8 0.49 0.09
 2 1 -8 0.51 0.1
 2 -1 -8 0.62 0.11
 -2 -1 8 0.51 0.09
 -2 1 7 0.03 0.02
 2 1 -7 0.14 0.07
 2 -1 -7 0.04 0.03
 -2 -1 7 0.06 0.05
 -2 1 6 15.15 0.88
 2 1 -6 14.29 0.91
 -2 1 6 14.92 0.87
 -2 -1 6 15.33 0.88
 -2 -1 6 14.5 0.87
 2 -1 -6 14.2 0.91
 -2 1 5 1.71 0.14
 -2 1 5 1.92 0.13
 2 1 -5 2.43 0.16
 2 -1 -5 1.62 0.15
 -2 -1 5 2.25 0.13
 -2 -1 5 2.43 0.14
 -2 1 4 5.42 0.33
 2 1 -4 5.42 0.35
 -2 1 4 5.37 0.33
 -2 -1 4 5.24 0.33
 2 -1 -4 5.6 0.35
 -2 -1 4 5.46 0.33
 -2 1 3 1.69 0.11
 -2 1 3 1.69 0.11
 2 1 -3 1.58 0.11
 -2 -1 3 1.68 0.11
 -2 -1 3 1.61 0.11
 2 -1 -3 1.51 0.11
 2 -1 -3 1.66 0.11
 2 1 -2 2.12 0.13
 2 1 -2 2.15 0.14
 -2 1 2 2.12 0.13
 2 -1 -2 2.09 0.14
 2 -1 -2 2.14 0.13
 -2 -1 2 2.02 0.13
 -2 1 1 8.96 0.56
 2 -1 -1 9.55 0.57
 2 -1 -1 9.43 0.54
 -2 1 0 19.23 1.19
 2 1 0 20.79 1.21
 2 1 0 20.35 1.15
 2 -1 0 19.9 1.21
 2 -1 0 20.31 1.15
 -2 -1 0 20.17 1.19
 -2 1 -1 14.4 0.86
 2 -1 1 14.14 0.83
 2 -1 1 14.85 0.88
 2 1 2 22.27 1.38
 -2 1 -2 23.11 1.35
 2 1 2 23.09 1.31
 2 1 2 22.78 1.35
 2 -1 2 22.88 1.31
 2 -1 2 22.68 1.38
 2 1 3 13.93 0.85
 2 1 4 0.02 0.02
 2 1 4 0.01 0.01
 2 1 4 0 0.02
 -2 1 -4 0 0.01
 2 -1 4 0.01 0.02
 2 -1 4 -0.01 0.01
 2 1 5 0.75 0.07
 2 1 5 0.7 0.08
 -2 1 -5 0.74 0.06
 2 1 5 0.72 0.08
 2 -1 5 0.69 0.09
 2 -1 5 0.76 0.09
 2 1 6 0.18 0.06
 2 1 6 0.15 0.07
 2 -1 6 0.15 0.06
 2 -1 6 0.14 0.07
 -2 1 -7 0.53 0.1
 2 1 7 0.38 0.09
 -2 -1 -7 0.45 0.1
 2 -1 7 0.37 0.09
 2 1 8 0.24 0.09
 -2 1 -8 0.48 0.12
 2 -1 8 0.37 0.09
 -2 -1 -8 0.27 0.1
 -2 1 -9 0.68 0.14
 2 1 9 0.57 0.12
 2 -1 9 0.48 0.11
 -2 -1 -9 0.75 0.13
 2 1 10 -0.04 0.03
 -2 1 -10 0.02 0.06
 -2 -1 -10 0.03 0.06
 2 -1 10 0.04 0.04
 2 2 -12 1.09 0.2
 -2 2 12 0.82 0.16
 2 -2 -12 0.78 0.18
 -2 -2 12 1.03 0.16
 2 -2 -12 1.11 0.19
 -2 2 11 0.44 0.13
 2 2 -11 0.32 0.13
 2 -2 -11 0.07 0.05
 -2 -2 11 0.17 0.11
 2 -2 -11 0.1 0.07
 2 2 -10 0 0.05
 -2 2 10 0.08 0.04
 -2 -2 10 0 0.03
 2 -2 -10 0.07 0.05
 -2 2 9 0.96 0.11
 2 2 -9 0.88 0.13
 -2 -2 9 0.71 0.1
 2 -2 -9 0.78 0.13
 -2 2 8 5.74 0.39
 2 2 -8 6.31 0.41
 2 -2 -8 5.77 0.41
 -2 -2 8 6.24 0.39
 -2 2 7 0.68 0.09
 2 2 -7 0.75 0.1
 -2 2 7 0.69 0.06
 -2 -2 7 0.59 0.08
 2 -2 -7 0.74 0.1
 -2 2 6 45.98 2.34
 2 2 -6 34.55 2.4
 -2 -2 6 36.99 2.33
 2 -2 -6 46.51 2.4
 -2 -2 6 34.66 2.28
 2 2 -5 5.23 0.34
 -2 2 5 5.34 0.32
 -2 2 5 5.17 0.32
 2 -2 -5 5.15 0.34
 -2 -2 5 5.21 0.32
 -2 -2 5 5.31 0.32
 -2 2 4 74.86 4.71
 2 2 -4 92.94 4.81
 -2 2 4 75.15 4.58
 2 -2 -4 76 4.81
 2 -2 -4 73.83 4.58
 -2 -2 4 88.92 4.71
 -2 2 3 5.28 0.32
 2 2 -3 5.31 0.33
 -2 -2 3 5.13 0.31
 2 -2 -3 5.14 0.31
 2 -2 -3 5.3 0.33
 -2 -2 3 5.02 0.31
 2 2 -2 230.57 12.97
 2 2 -2 223.56 13.59
 -2 2 2 233.31 13.38
 -2 -2 2 235.53 12.97
 -2 -2 2 216.36 13.35
 2 -2 -2 223.83 13.61
 2 -2 -2 228.71 12.99
 -2 2 1 9.64 0.59
 2 2 -1 9.61 0.56
 2 2 -1 9.95 0.6
 -2 -2 1 9.82 0.59
 2 -2 -1 9.92 0.6
 2 -2 -1 10.17 0.57
 2 2 0 15.27 0.87
 2 2 0 14.93 0.92
 2 2 0 15.22 0.9
 -2 2 0 15.47 0.9
 2 -2 0 15.5 0.87
 2 -2 0 14.88 0.92
 2 2 1 8.8 0.52
 -2 2 -1 8.33 0.51
 2 2 1 8.82 0.53
 2 2 1 8.46 0.5
 2 -2 1 8.61 0.53
 2 -2 1 8.76 0.5
 2 2 2 51.73 2.73
 2 2 2 50.74 2.81
 2 2 2 49.34 2.86
 -2 2 -2 44.71 2.8
 2 -2 2 44.99 2.86
 2 -2 2 44.9 2.73
 2 2 3 20.58 1.25
 -2 2 -3 20.42 1.22
 2 2 3 20.65 1.19
 2 2 3 21.39 1.22
 2 -2 3 20.03 1.25
 2 -2 3 20.7 1.2
 2 2 4 2.29 0.16
 -2 2 -4 2.24 0.14
 2 2 4 2.41 0.15
 2 2 4 2.13 0.16
 2 -2 4 2.18 0.16
 2 -2 4 2.23 0.16
 2 2 5 14.65 0.89
 -2 2 -5 14.92 0.9
 2 2 5 14.94 0.93
 2 2 5 16.19 0.9
 2 -2 5 14.61 0.89
 2 -2 5 15.25 0.94
 2 2 6 0.07 0.03
 2 2 6 0.11 0.07
 2 -2 6 0.2 0.07
 2 -2 6 0.1 0.06
 2 2 7 2.88 0.21
 -2 -2 -7 2.66 0.22
 2 -2 7 2.56 0.21
 -2 2 -8 0.99 0.14
 2 2 8 1.22 0.13
 2 -2 8 1.01 0.13
 -2 -2 -8 1.38 0.16
 2 2 9 0.03 0.04
 -2 2 -9 0.16 0.11
 2 -2 9 0.01 0.04
 -2 -2 -9 0.01 0.05
 -2 2 -10 0.31 0.15
 2 2 10 0.19 0.11
 2 -2 10 0.27 0.11
 -2 -2 -10 0.31 0.13
 2 3 -12 2.38 0.25
 -2 3 12 2.41 0.22
 -2 -3 12 2.15 0.22
 2 -3 -12 2.48 0.26
 2 -3 -12 2.29 0.25
 2 3 -11 0.05 0.06
 -2 3 11 0.03 0.04
 2 -3 -11 0.04 0.05
 2 -3 -11 0.17 0.13
 -2 -3 11 0.03 0.04
 -2 3 10 0.43 0.11
 2 3 -10 0.43 0.13
 -2 -3 10 0.4 0.1
 2 -3 -10 0.48 0.14
 2 -3 -10 0.26 0.12
 -2 3 9 0.23 0.09
 2 3 -9 0.34 0.1
 2 -3 -9 0.33 0.1
 -2 -3 9 0.25 0.08
 2 3 -8 1 0.12
 -2 3 8 0.83 0.11
 2 -3 -8 0.93 0.13
 -2 -3 8 0.85 0.11
 2 3 -7 1.95 0.18
 -2 3 7 2.54 0.17
 -2 3 7 2.46 0.16
 2 -3 -7 2.68 0.19
 -2 -3 7 1.81 0.16
 2 3 -6 17.39 1.07
 -2 3 6 17.15 1.02
 -2 3 6 17.66 1.03
 2 -3 -6 16.79 1.06
 -2 -3 6 17.69 1.02
 -2 -3 6 17.16 1.01
 2 3 -5 14.8 0.84
 -2 3 5 12.57 0.81
 -2 3 5 12.7 0.8
 2 -3 -5 12.41 0.83
 -2 -3 5 14.97 0.8
 2 -3 -5 12.54 0.8
 -2 -3 5 15.04 0.8
 2 3 -4 56.9 3.42
 -2 3 4 55.1 3.26
 -2 3 4 57.02 3.35
 2 -3 -4 55.73 3.42
 2 -3 -4 57.56 3.26
 -2 -3 4 58.75 3.34
 -2 -3 4 57.66 3.26
 -2 3 3 4.5 0.31
 2 -3 -3 4.57 0.3
 2 -3 -3 4.78 0.32
 -2 -3 3 6.15 0.3
 2 3 -2 19.72 1.16
 -2 3 2 19.41 1.14
 -2 -3 2 19.29 1.14
 2 -3 -2 19.67 1.11
 2 -3 -2 18.82 1.16
 -2 -3 2 19.07 1.11
 2 3 -1 27.57 1.78
 -2 3 1 32.03 1.78
 2 3 -1 27.37 1.81
 -2 -3 1 27.1 1.77
 2 -3 -1 33.65 1.73
 2 -3 -1 33.12 1.81
 2 3 0 67.85 3.99
 2 3 0 65.17 3.8
 -2 3 0 65.87 3.92
 2 3 0 67.62 3.92
 2 -3 0 67.08 3.99
 2 -3 0 67.06 3.81
 -2 3 -1 100.05 5.46
 2 3 1 84.34 5.56
 2 3 1 85.17 5.3
 2 3 1 88.01 5.46
 2 -3 1 99.55 5.31
 2 -3 1 101.37 5.56
 -2 3 -2 0.12 0.02
 2 3 2 0.16 0.03
 2 3 2 0.17 0.03
 2 3 2 0.26 0.03
 2 -3 2 0.24 0.04
 2 -3 2 0.17 0.03
 2 3 3 2.35 0.17
 2 3 3 2.51 0.18
 -2 3 -3 2.65 0.16
 2 3 3 2.5 0.17
 2 -3 3 2.78 0.17
 2 -3 3 2.71 0.18
 2 3 4 3.75 0.24
 2 3 4 3.81 0.24
 2 3 4 3.7 0.25
 -2 3 -4 3.74 0.23
 2 -3 4 3.95 0.26
 2 -3 4 3.59 0.24
 2 3 5 6.68 0.43
 2 3 5 7.01 0.42
 2 3 5 6.92 0.44
 2 3 6 0.66 0.09
 2 3 6 0.73 0.09
 2 -3 6 0.67 0.09
 2 -3 6 0.63 0.09
 2 3 7 0.4 0.08
 -2 -3 -7 0.47 0.1
 2 -3 7 0.32 0.08
 2 3 8 0.96 0.12
 -2 3 -8 1 0.14
 2 -3 8 0.85 0.12
 -2 -3 -8 1.06 0.14
 -2 3 -9 0.26 0.12
 2 3 9 0.03 0.04
 2 -3 9 0.06 0.04
 -2 -3 -9 0.16 0.11
 -2 3 -10 0.45 0.14
 2 3 10 0.42 0.12
 -2 -3 -10 0.34 0.15
 2 -3 10 0.28 0.12
 2 -4 -12 0.66 0.16
 2 -4 -12 0.3 0.15
 -2 -4 12 0.25 0.13
 2 4 -11 0.28 0.14
 -2 4 11 0.17 0.12
 2 -4 -11 0.26 0.14
 -2 -4 11 0.3 0.11
 2 4 -10 0.14 0.11
 -2 4 10 0.39 0.12
 2 -4 -10 0.44 0.13
 -2 -4 10 0.38 0.09
 2 -4 -10 0.51 0.12
 -2 4 9 -0.03 0.03
 2 4 -9 0.02 0.04
 2 -4 -9 -0.04 0.03
 2 -4 -9 0.02 0.04
 -2 -4 9 0.01 0.03
 -2 4 8 3.47 0.26
 2 4 -8 3.86 0.28
 2 -4 -8 3.59 0.27
 2 -4 -8 3.53 0.26
 -2 -4 8 4.03 0.26
 2 4 -7 1.24 0.12
 -2 4 7 1.03 0.11
 -2 4 7 1.03 0.09
 2 -4 -7 1.04 0.11
 2 -4 -7 1.02 0.12
 -2 -4 7 1.1 0.1
 -2 4 6 11.11 0.71
 2 4 -6 13.01 0.75
 -2 4 6 11.61 0.72
 -2 -4 6 13.27 0.71
 2 -4 -6 11.26 0.74
 2 -4 -6 11.24 0.71
 -2 4 5 4.24 0.26
 2 4 -5 4.12 0.28
 -2 4 5 4.02 0.26
 2 -4 -5 4.15 0.28
 -2 -4 5 4.19 0.26
 -2 -4 5 4.21 0.25
 2 -4 -5 4.17 0.27
 2 4 -4 5.47 0.32
 -2 -4 4 4.6 0.3
 -2 -4 4 4.83 0.3
 -2 4 3 11.72 0.71
 2 4 -3 12.04 0.72
 -2 -4 3 11.53 0.7
 2 -4 -3 11.88 0.69
 2 -4 -3 11.84 0.72
 -2 -4 3 12.21 0.69
 -2 -4 2 1.41 0.09
 2 -4 -2 1.37 0.1
 2 4 -1 8.85 0.53
 2 4 -1 9.11 0.54
 -2 4 1 8.77 0.53
 2 -4 -1 8.59 0.54
 2 -4 -1 9.07 0.52
 2 4 0 27.96 1.89
 -2 4 0 35.05 1.86
 2 4 0 26.95 1.86
 2 -4 0 36.45 1.9
 2 4 1 14.28 0.86
 -2 4 -1 14.06 0.84
 2 4 1 13.91 0.84
 2 4 1 14 0.82
 2 -4 1 14.54 0.82
 2 -4 1 14.29 0.86
 2 4 2 0.6 0.05
 2 4 2 0.57 0.05
 2 4 2 0.69 0.06
 2 4 3 0.7 0.07
 2 4 3 0.78 0.06
 2 4 3 0.63 0.06
 -2 4 -3 0.72 0.05
 2 -4 3 0.71 0.07
 2 -4 3 0.81 0.07
 2 4 4 10.22 0.55
 -2 4 -4 8.31 0.54
 2 4 4 9.83 0.56
 2 4 4 9.83 0.57
 2 -4 4 8.61 0.57
 2 -4 4 8.11 0.55
 2 4 5 22.84 1.37
 2 4 5 23.38 1.43
 2 4 5 24.53 1.4
 2 -4 5 23.54 1.44
 2 -4 5 23.4 1.37
 2 4 6 0.8 0.08
 2 4 6 0.64 0.09
 2 4 7 0.99 0.12
 -2 -4 -7 0.96 0.13
 2 -4 7 1.02 0.11
 -2 4 -8 0.5 0.11
 2 4 8 0.14 0.09
 2 -4 8 0.37 0.1
 -2 -4 -8 0.24 0.11
 -2 4 -9 0.07 0.05
 2 4 9 0.01 0.03
 -2 -4 -9 -0.01 0.04
 2 -4 9 0.01 0.03
 2 4 10 0.29 0.12
 -2 4 -10 0.18 0.14
 2 -4 10 0.04 0.05
 -2 -4 -10 0.25 0.14
 2 5 -11 0.07 0.06
 2 -5 -11 0.26 0.13
 2 -5 -11 0.05 0.06
 -2 -5 11 0.23 0.11
 -2 5 10 0.08 0.04
 2 5 -10 0.14 0.12
 2 -5 -10 0.18 0.11
 -2 -5 10 0.23 0.09
 2 -5 -10 0.17 0.11
 -2 5 9 0.03 0.03
 2 5 -9 0.16 0.1
 -2 -5 9 0 0.03
 2 -5 -9 0.15 0.09
 2 -5 -9 0 0.03
 2 5 -8 1.45 0.15
 -2 5 8 1.2 0.13
 -2 -5 8 1.31 0.13
 2 -5 -8 1.1 0.13
 2 -5 -8 1.39 0.14
 2 5 -7 0.2 0.07
 -2 5 7 0.16 0.07
 -2 5 7 0.22 0.05
 2 -5 -7 0.2 0.07
 2 -5 -7 0.18 0.07
 -2 -5 7 0.14 0.06
 -2 5 6 0.7 0.07
 -2 5 6 0.66 0.08
 2 5 -6 0.66 0.09
 2 -5 -6 0.77 0.09
 2 -5 -6 0.74 0.09
 -2 -5 6 0.82 0.08
 2 5 -5 17.79 1.01
 -2 5 5 14.96 0.98
 -2 -5 5 18.19 0.97
 2 -5 -5 14.83 0.96
 -2 -5 5 18.38 0.96
 2 -5 -5 14.7 1.01
 2 5 -4 42.74 2.68
 -2 5 4 44.05 2.63
 -2 -5 4 45.22 2.62
 -2 -5 4 46.1 2.56
 2 -5 -4 44.66 2.56
 2 -5 -4 44.99 2.68
 -2 5 3 14.61 0.89
 2 5 -3 15.05 0.91
 -2 -5 3 14.64 0.88
 2 -5 -3 15.09 0.91
 -2 -5 3 14.94 0.86
 2 -5 -3 15.19 0.87
 -2 5 2 0.9 0.06
 2 5 -2 0.89 0.06
 2 5 -2 0.76 0.06
 -2 -5 2 0.68 0.05
 2 -5 -2 0.78 0.06
 2 5 -1 48.03 2.67
 -2 5 1 45.1 2.63
 2 5 -1 44.4 2.63
 2 -5 -1 44.08 2.55
 2 -5 -1 41.73 2.67
 2 5 0 11.27 0.69
 2 5 0 11.54 0.66
 -2 5 0 11.36 0.68
 2 5 0 11.7 0.69
 2 -5 0 11.76 0.67
 2 -5 0 11.35 0.7
 -2 5 -1 0.92 0.07
 2 5 1 1.14 0.07
 2 -5 1 0.9 0.07
 2 5 2 0.29 0.04
 2 5 2 0.29 0.04
 -2 5 -2 0.29 0.03
 2 5 2 0.26 0.04
 2 -5 2 0.27 0.04
 2 -5 2 0.28 0.04
 2 5 3 11.73 0.77
 -2 5 -3 14.58 0.77
 2 5 3 11.54 0.75
 2 5 3 11.98 0.79
 2 -5 3 14.74 0.8
 -2 5 -4 0.51 0.04
 2 5 4 0.53 0.06
 2 5 4 0.49 0.06
 2 5 4 0.53 0.06
 2 -5 4 0.53 0.07
 2 -5 4 0.54 0.07
 2 5 5 2.68 0.19
 2 5 5 2.69 0.19
 2 5 5 2.81 0.18
 2 -5 5 2.33 0.19
 2 -5 5 2.57 0.2
 2 5 6 2.35 0.17
 2 5 6 2.38 0.18
 2 -5 6 2.24 0.19
 2 -5 6 2.25 0.18
 -2 -5 -6 2.36 0.19
 2 5 7 0.48 0.09
 2 -5 7 0.42 0.09
 -2 -5 -7 0.47 0.1
 2 -5 7 0.57 0.09
 -2 5 -8 0.03 0.05
 2 5 8 0 0.03
 -2 -5 -8 -0.04 0.04
 2 -5 8 -0.03 0.03
 2 5 9 0.55 0.11
 -2 5 -9 0.47 0.13
 2 -5 9 0.49 0.12
 -2 -5 -9 0.43 0.12
 -2 5 -10 0.02 0.06
 2 5 10 0 0.04
 -2 -5 -10 0.03 0.06
 2 -5 10 0.06 0.05
 2 6 -11 0.28 0.13
 2 -6 -11 0.22 0.15
 -2 -6 11 0.25 0.11
 2 -6 -11 0.58 0.14
 2 6 -10 0.02 0.05
 2 -6 -10 -0.05 0.04
 2 -6 -10 0.01 0.05
 -2 -6 10 0.04 0.03
 -2 6 9 0.15 0.09
 2 6 -9 0.19 0.1
 2 -6 -9 -0.01 0.04
 2 -6 -9 0.02 0.03
 -2 -6 9 0.04 0.03
 -2 6 8 15.02 0.93
 2 6 -8 15.41 0.97
 2 -6 -8 16.09 0.97
 2 -6 -8 15.33 0.93
 -2 -6 8 15.7 0.92
 -2 6 7 1.52 0.14
 -2 6 7 1.64 0.12
 2 6 -7 1.73 0.15
 2 -6 -7 1.52 0.14
 -2 -6 7 1.69 0.14
 2 -6 -7 1.73 0.15
 2 6 -6 0.37 0.07
 -2 6 6 0.11 0.04
 2 -6 -6 0.14 0.06
 -2 -6 6 0.38 0.06
 2 -6 -6 0.09 0.05
 2 6 -5 4.25 0.28
 -2 6 5 4.21 0.26
 2 -6 -5 3.94 0.27
 -2 -6 5 4.16 0.25
 2 -6 -5 4.11 0.27
 -2 -6 5 4.16 0.26
 2 6 -4 32.31 1.96
 -2 6 4 30.84 1.92
 2 -6 -4 31.83 1.87
 -2 -6 4 34.59 1.86
 2 -6 -4 31.85 1.95
 -2 -6 4 33.21 1.91
 -2 6 3 1.37 0.1
 2 6 -3 1.59 0.11
 2 -6 -3 1.45 0.11
 -2 -6 3 1.48 0.1
 -2 -6 3 1.51 0.1
 2 -6 -3 1.51 0.11
 2 6 -2 76.65 4.91
 -2 6 2 84.4 4.83
 2 6 -2 79.23 4.83
 2 -6 -2 87.21 4.92
 -2 -6 2 77.63 4.68
 2 -6 -2 88.24 4.69
 2 6 -1 0.13 0.02
 -2 6 1 0.22 0.03
 2 6 -1 0.06 0.03
 2 -6 -1 0.05 0.02
 2 -6 -1 0.19 0.03
 -2 6 0 117.51 7.53
 2 6 0 137.3 7.67
 2 6 0 140.46 7.56
 -2 -6 0 137.63 7.3
 2 -6 0 118.27 7.3
 2 -6 0 118.29 7.66
 2 6 1 11.86 0.72
 -2 6 -1 11.94 0.71
 2 6 1 11.67 0.69
 2 6 1 11.87 0.71
 2 -6 1 12.26 0.73
 2 -6 1 11.86 0.69
 2 6 2 21.35 1.26
 2 6 2 21.47 1.25
 2 6 2 22.19 1.21
 -2 6 -2 20.78 1.24
 2 -6 2 19.97 1.27
 2 -6 2 19.99 1.21
 2 6 3 9.62 0.59
 2 6 3 9.51 0.56
 2 6 3 9.15 0.58
 -2 6 -3 9.74 0.57
 2 -6 3 9.24 0.57
 2 -6 3 9.71 0.59
 2 6 4 0.64 0.07
 2 6 4 0.56 0.07
 2 6 4 0.66 0.07
 2 6 5 0.23 0.06
 2 6 5 0.12 0.05
 2 6 5 0.16 0.07
 2 -6 5 0.16 0.07
 2 -6 5 0.25 0.07
 2 6 6 9.46 0.59
 2 6 6 8.95 0.58
 2 -6 6 10.08 0.59
 -2 -6 -6 9.53 0.61
 2 -6 6 9.75 0.61
 2 6 7 0.83 0.1
 -2 -6 -7 0.9 0.12
 2 -6 7 0.77 0.11
 2 -6 7 0.9 0.11
 2 6 8 0.87 0.12
 -2 6 -8 0.81 0.14
 -2 -6 -8 0.93 0.12
 2 -6 8 0.88 0.12
 -2 6 -9 0.18 0.12
 2 6 9 0.01 0.04
 2 -6 9 0.03 0.04
 -2 -6 -9 0.05 0.05
 2 6 10 0.16 0.12
 -2 6 -10 -0.04 0.05
 -2 -6 -10 0.06 0.06
 2 -6 10 0.01 0.04
 2 7 -11 0.02 0.06
 -2 -7 11 0 0.03
 2 -7 -11 -0.04 0.05
 2 -7 -11 -0.06 0.05
 2 7 -10 -0.02 0.05
 -2 -7 10 0.03 0.03
 2 -7 -10 -0.02 0.04
 2 -7 -10 0.01 0.04
 2 7 -9 1.38 0.16
 -2 -7 9 1.23 0.14
 2 -7 -9 1.92 0.17
 2 7 -8 4.72 0.34
 -2 -7 8 4.77 0.32
 2 -7 -8 4.97 0.34
 2 -7 -8 4.76 0.33
 2 7 -7 6.93 0.46
 -2 7 7 7 0.43
 2 -7 -7 6.59 0.44
 2 -7 -7 6.82 0.45
 -2 -7 7 7.37 0.43
 -2 7 6 0.91 0.08
 2 7 -6 0.91 0.1
 2 -7 -6 0.82 0.09
 -2 -7 6 0.82 0.08
 2 -7 -6 0.9 0.09
 -2 7 5 46.54 2.7
 2 7 -5 42.7 2.75
 -2 -7 5 45.18 2.68
 -2 -7 5 45.36 2.62
 2 -7 -5 47.58 2.75
 2 -7 -5 47 2.63
 2 7 -4 13.84 0.85
 -2 7 4 13.91 0.83
 2 -7 -4 14.03 0.85
 2 -7 -4 13.8 0.82
 -2 -7 4 13.6 0.82
 -2 -7 4 14.3 0.81
 2 7 -3 10.5 0.63
 -2 7 3 10.47 0.64
 2 7 -3 10.18 0.65
 -2 -7 3 10.93 0.62
 -2 -7 3 10.56 0.63
 2 -7 -3 10.92 0.65
 2 -7 -3 10.82 0.63
 2 7 -2 63.73 3.7
 -2 7 2 61.92 3.7
 2 7 -2 63.21 3.76
 2 -7 -2 62.92 3.76
 2 -7 -2 63.56 3.6
 -2 -7 2 62.01 3.58
 2 7 -1 238.49 14.54
 -2 7 1 247.98 14.32
 2 7 -1 235.48 14.32
 2 -7 -1 253.42 14.58
 2 -7 -1 258.29 13.9
 -2 -7 1 227.39 13.86
 2 7 0 19.94 1.23
 -2 7 0 20.39 1.22
 2 7 0 20.6 1.24
 2 -7 0 21.2 1.25
 -2 -7 0 20.71 1.18
 2 -7 0 21.1 1.19
 2 7 1 69.89 4.24
 -2 7 -1 73.43 4.24
 2 7 1 71.65 4.31
 2 7 1 73.19 4.11
 -2 -7 -1 74.98 4.11
 2 -7 1 69.95 4.12
 2 -7 1 71.93 4.32
 2 7 2 0.55 0.06
 2 7 2 0.56 0.05
 -2 7 -2 0.6 0.05
 2 7 2 0.53 0.05
 2 -7 2 0.59 0.06
 2 -7 2 0.58 0.06
 -2 7 -3 65.85 3.88
 2 7 3 66.15 3.78
 2 7 3 66.39 3.96
 2 7 3 66.5 3.89
 2 -7 3 65.31 3.79
 2 -7 3 66.47 3.97
 2 7 4 6.93 0.43
 -2 7 -4 7.44 0.43
 2 7 4 6.92 0.44
 2 7 4 7.61 0.45
 2 -7 4 7.11 0.46
 2 -7 4 6.96 0.44
 2 7 5 20.4 1.23
 2 7 5 20.03 1.17
 2 7 5 21.05 1.2
 2 -7 5 19.15 1.23
 2 -7 5 19.65 1.18
 2 7 6 0.39 0.08
 2 7 6 0.5 0.07
 2 -7 6 0.48 0.09
 -2 -7 -6 0.51 0.09
 2 -7 6 0.39 0.08
 2 7 7 0.95 0.12
 -2 -7 -7 1.07 0.13
 2 -7 7 1.25 0.13
 2 -7 7 1.33 0.13
 -2 7 -8 0.17 0.11
 2 7 8 0.01 0.03
 -2 -7 -8 0.04 0.04
 2 -7 8 0.03 0.03
 -2 7 -9 0.25 0.12
 2 7 9 0.51 0.12
 2 -7 9 0.21 0.11
 -2 -7 -9 0.61 0.13
 -2 7 -10 0.19 0.13
 2 7 10 0.41 0.12
 2 -7 10 0.18 0.11
 -2 -7 -10 0.22 0.14
 2 8 -11 0.13 0.07
 2 -8 -11 0.16 0.12
 2 -8 -11 0.44 0.13
 -2 -8 11 0.22 0.1
 2 8 -10 0.08 0.05
 2 -8 -10 0.1 0.05
 2 -8 -10 0.06 0.05
 -2 -8 10 0.22 0.09
 2 8 -9 5.03 0.36
 2 -8 -9 5.12 0.35
 -2 -8 9 4.95 0.34
 2 -8 -9 4.96 0.36
 -2 8 8 3.46 0.22
 2 8 -8 2.73 0.25
 2 -8 -8 3.62 0.25
 -2 -8 8 2.65 0.22
 2 -8 -8 3.53 0.25
 2 8 -7 0.18 0.08
 -2 8 7 0.09 0.05
 -2 -8 7 0.13 0.06
 2 -8 -7 0.08 0.07
 2 -8 -7 0.1 0.07
 -2 8 6 0.69 0.07
 2 8 -6 0.74 0.09
 2 -8 -6 0.67 0.08
 -2 -8 6 0.72 0.08
 2 -8 -6 0.69 0.09
 -2 8 5 7.7 0.48
 2 8 -5 7.73 0.5
 -2 -8 5 8.12 0.47
 2 -8 -5 7.39 0.48
 2 -8 -5 8.06 0.49
 -2 -8 5 8.01 0.47
 2 8 -4 1.82 0.14
 -2 8 4 2 0.14
 2 -8 -4 2.09 0.14
 2 -8 -4 2.32 0.14
 -2 -8 4 1.73 0.12
 -2 -8 4 1.72 0.13
 2 8 -3 2.38 0.15
 -2 8 3 2.36 0.16
 2 8 -3 2.51 0.16
 -2 -8 3 2.33 0.15
 2 -8 -3 2.43 0.16
 2 -8 -3 2.52 0.16
 2 8 -2 27.7 1.88
 -2 8 2 34.52 1.89
 2 8 -2 28.55 1.91
 2 -8 -2 36.09 1.92
 -2 -8 2 29.19 1.82
 2 -8 -2 35.66 1.84
 -2 8 1 16.96 1
 2 8 -1 17.05 1.01
 2 8 -1 16.44 1
 2 -8 -1 17.08 0.97
 -2 -8 1 16.27 0.96
 2 -8 -1 16.9 1.01
 -2 8 0 5.76 0.34
 2 8 0 4.66 0.33
 2 -8 0 6.32 0.33
 -2 -8 0 4.59 0.32
 2 -8 0 6.42 0.34
 2 8 1 0.12 0.03
 -2 8 -1 0.18 0.03
 2 8 1 0.09 0.03
 2 -8 1 0.13 0.04
 2 -8 1 0.2 0.04
 -2 -8 -1 0.19 0.03
 2 8 2 3.8 0.26
 2 8 2 3.89 0.27
 2 8 2 3.77 0.27
 2 -8 2 5.33 0.28
 2 -8 2 5.18 0.28
 2 8 3 0.73 0.06
 2 8 3 0.54 0.06
 2 8 3 0.7 0.07
 -2 8 -3 0.5 0.05
 2 -8 3 0.65 0.07
 2 -8 3 0.55 0.07
 2 8 4 0.53 0.07
 2 8 4 0.68 0.07
 2 8 4 0.51 0.06
 2 8 5 5.68 0.37
 2 8 5 6.2 0.38
 2 -8 5 6.03 0.39
 2 -8 5 5.62 0.37
 2 8 6 3.61 0.23
 2 8 6 3.86 0.24
 2 -8 6 2.91 0.25
 -2 -8 -6 3.76 0.25
 2 -8 6 2.85 0.23
 2 8 7 0.02 0.03
 2 -8 7 -0.01 0.03
 -2 -8 -7 0.09 0.07
 2 -8 7 0.04 0.03
 -2 8 -8 0.39 0.12
 2 8 8 0.46 0.11
 -2 -8 -8 0.56 0.11
 2 -8 8 0.61 0.11
 -2 8 -9 0.71 0.14
 2 8 9 0.8 0.13
 -2 -8 -9 0.88 0.14
 2 -8 9 0.57 0.12
 2 8 10 0.31 0.13
 -2 8 -10 0.25 0.13
 2 -8 10 0.07 0.05
 -2 -8 -10 0.24 0.13
 -2 -8 -10 0.08 0.06
 2 9 -11 0.06 0.06
 2 -9 -11 0.04 0.05
 2 -9 -11 0.17 0.13
 -2 -9 11 0.13 0.1
 2 9 -10 0.02 0.05
 2 -9 -10 0.13 0.11
 2 -9 -10 -0.06 0.04
 -2 -9 10 0.01 0.03
 2 9 -9 0.93 0.13
 -2 -9 9 0.6 0.1
 2 -9 -9 0.47 0.11
 2 -9 -9 0.47 0.11
 2 9 -8 3.58 0.28
 -2 9 8 3.6 0.25
 2 -9 -8 3.82 0.27
 -2 -9 8 3.42 0.25
 2 -9 -8 3.79 0.27
 -2 9 7 3.35 0.22
 2 9 -7 2.68 0.23
 -2 -9 7 2.74 0.21
 2 -9 -7 3.4 0.23
 2 -9 -7 3.48 0.23
 -2 9 6 8.08 0.49
 2 9 -6 7.51 0.5
 -2 -9 6 8.02 0.48
 2 -9 -6 7.51 0.49
 2 -9 -6 8.18 0.5
 -2 9 5 4.13 0.31
 2 -9 -5 4.21 0.31
 -2 -9 5 5.7 0.31
 -2 -9 5 5.4 0.29
 -2 9 4 0 0.01
 2 9 -4 0.02 0.02
 2 -9 -4 0.01 0.01
 -2 -9 4 0.05 0.03
 -2 -9 4 0.01 0.01
 2 -9 -4 -0.01 0.01
 2 9 -3 9.81 0.58
 2 9 -3 9.65 0.6
 2 9 -2 0.11 0.03
 2 9 -2 0.08 0.03
 -2 9 2 0.06 0.03
 2 -9 -2 0.11 0.03
 -2 -9 2 0.06 0.02
 2 -9 -2 0.09 0.04
 2 9 -1 0.04 0.03
 2 9 -1 0.09 0.02
 -2 9 1 0.12 0.03
 2 -9 -1 0.17 0.04
 -2 -9 1 0.04 0.02
 2 -9 -1 0.14 0.03
 -2 9 0 25.66 1.53
 2 9 0 26.35 1.55
 2 9 0 25.41 1.54
 2 -9 0 26.36 1.56
 -2 -9 0 25.42 1.48
 2 -9 0 26.19 1.49
 2 9 1 76.12 4.81
 2 9 1 80.13 4.74
 -2 9 -1 81.52 4.73
 2 -9 1 85 4.82
 -2 -9 -1 78.74 4.59
 2 -9 1 81.61 4.6
 2 9 2 1.82 0.12
 2 9 2 1.77 0.13
 -2 9 -2 1.76 0.12
 2 -9 2 1.85 0.13
 2 -9 2 1.91 0.13
 -2 -9 -2 1.83 0.12
 2 9 3 7.24 0.48
 -2 9 -3 7.98 0.46
 2 9 3 7.58 0.48
 2 9 3 7.26 0.46
 2 -9 3 8.5 0.49
 2 -9 3 7.84 0.47
 2 9 4 0.59 0.06
 2 9 4 0.48 0.07
 2 9 4 0.57 0.07
 2 -9 4 0.65 0.08
 2 -9 4 0.63 0.08
 2 9 5 1.11 0.11
 2 9 5 1.2 0.11
 2 -9 5 1.43 0.13
 2 -9 5 1.28 0.12
 -2 -9 -5 1.22 0.11
 2 9 6 2.42 0.18
 2 9 6 2.43 0.18
 -2 -9 -6 2.43 0.19
 2 -9 6 2.34 0.19
 2 -9 6 2.23 0.18
 2 9 7 0.54 0.1
 2 -9 7 0.72 0.1
 2 -9 7 0.75 0.11
 -2 -9 -7 0.69 0.1
 2 9 8 0.03 0.03
 -2 9 -8 -0.02 0.04
 2 -9 8 0.05 0.04
 -2 -9 -8 0.04 0.04
 -2 9 -9 0.06 0.06
 2 9 9 0.06 0.04
 -2 -9 -9 0.15 0.1
 -2 -9 -9 0.21 0.12
 2 -9 9 0.22 0.1
 2 9 10 1.37 0.18
 -2 9 -10 1.18 0.18
 -2 -9 -10 1.81 0.19
 2 -9 10 1.52 0.18
 -2 -9 -10 1.47 0.18
 2 10 -11 0.05 0.06
 2 -10 -11 0.03 0.06
 2 -10 -11 -0.01 0.05
 -2 -10 11 0.06 0.04
 2 10 -10 0 0.05
 2 -10 -10 0.01 0.04
 -2 -10 10 -0.04 0.03
 2 -10 -10 0.05 0.05
 2 10 -9 1.06 0.14
 2 -10 -9 1.12 0.15
 -2 -10 9 0.92 0.12
 2 -10 -9 0.92 0.13
 -2 10 8 1.54 0.13
 2 10 -8 1.69 0.16
 2 -10 -8 1.54 0.16
 -2 -10 8 1.69 0.14
 2 -10 -8 1.67 0.15
 2 10 -7 2 0.17
 -2 10 7 1.99 0.15
 2 -10 -7 1.77 0.16
 -2 -10 7 2.01 0.15
 2 -10 -7 1.93 0.16
 -2 10 6 0.33 0.06
 2 -10 -6 0.23 0.06
 2 -10 -6 0.23 0.06
 2 10 -5 6.56 0.43
 -2 10 5 6.74 0.42
 2 -10 -5 6.39 0.41
 -2 -10 5 6.73 0.4
 2 -10 -5 6.69 0.42
 -2 10 4 0.06 0.04
 2 10 -4 0.04 0.02
 2 10 -4 0.06 0.04
 2 -10 -4 0.05 0.02
 -2 -10 4 0.02 0.01
 2 -10 -4 0.05 0.03
 2 10 -3 9.6 0.58
 -2 10 3 8.91 0.57
 2 10 -3 9.46 0.56
 -2 -10 3 9.37 0.55
 2 -10 -3 9.39 0.57
 2 -10 -3 9.29 0.56
 2 10 -2 76.93 4.48
 -2 10 2 75.25 4.48
 2 10 -2 77.94 4.55
 -2 -10 2 75.22 4.34
 2 -10 -2 76.07 4.35
 2 -10 -2 75.49 4.55
 -2 10 1 1.72 0.13
 2 10 -1 1.86 0.12
 2 10 -1 1.77 0.13
 2 -10 -1 1.83 0.12
 -2 -10 1 1.79 0.11
 2 -10 -1 1.92 0.13
 2 10 0 7.14 0.44
 2 10 0 7.19 0.43
 -2 -10 0 7.01 0.41
 -2 10 -1 5.07 0.32
 2 10 1 4.88 0.31
 2 10 1 5.08 0.32
 -2 -10 -1 5.09 0.31
 2 -10 1 5.62 0.32
 2 -10 1 5.31 0.33
 2 10 2 1.08 0.09
 2 10 2 1.14 0.07
 -2 10 -2 0.84 0.07
 2 -10 2 0.87 0.08
 -2 -10 -2 1.08 0.08
 2 -10 2 0.87 0.08
 2 10 3 4.22 0.27
 2 10 3 4.3 0.28
 2 10 3 4.34 0.27
 -2 10 -3 4.27 0.26
 -2 -10 -3 4.33 0.27
 2 -10 3 4.41 0.28
 2 -10 3 4.26 0.29
 2 10 4 2.28 0.16
 2 10 4 2.48 0.16
 -2 -10 -4 2.61 0.17
 2 -10 4 2.03 0.16
 2 -10 4 1.92 0.17
 2 10 5 0.12 0.06
 2 -10 5 0.21 0.07
 2 -10 5 0.27 0.07
 -2 -10 -5 0.1 0.06
 2 10 6 1.02 0.11
 2 10 6 1.06 0.12
 -2 -10 -6 1.03 0.12
 2 -10 6 1.6 0.14
 2 -10 6 1.62 0.14
 2 10 7 1.6 0.15
 2 -10 7 1.5 0.15
 -2 -10 -7 1.62 0.15
 -2 10 -8 0 0.05
 2 10 8 0.01 0.03
 2 -10 8 0.07 0.04
 -2 -10 -8 0.2 0.1
 -2 -10 -8 -0.02 0.04
 -2 10 -9 0.43 0.13
 2 10 9 0.35 0.12
 2 -10 9 0.53 0.12
 -2 -10 -9 0.42 0.13
 -2 -10 -9 0.36 0.12
 -2 10 -10 0.4 0.14
 2 10 10 0.75 0.13
 2 -10 10 0.21 0.12
 -2 -10 -10 0.66 0.16
 2 11 -11 0.09 0.06
 2 -11 -11 0.05 0.06
 2 -11 -11 0.04 0.06
 -2 -11 11 0.17 0.1
 2 11 -10 0.26 0.12
 2 -11 -10 0.11 0.06
 -2 -11 10 0.12 0.09
 2 -11 -10 0.11 0.05
 2 11 -9 1 0.15
 -2 -11 9 1.03 0.13
 2 -11 -9 1.41 0.16
 2 -11 -9 1.44 0.15
 2 11 -8 0.21 0.09
 -2 11 8 0.31 0.07
 2 -11 -8 0.28 0.08
 2 -11 -8 0.33 0.09
 -2 -11 8 0.35 0.08
 -2 11 7 0.45 0.07
 2 -11 -7 0.49 0.08
 2 -11 -7 0.51 0.09
 -2 11 6 0.26 0.06
 2 11 -6 0.27 0.08
 2 -11 -6 0.29 0.06
 2 -11 -6 0.16 0.06
 -2 -11 6 0.18 0.05
 -2 11 5 6.28 0.41
 2 -11 -5 6.71 0.41
 2 -11 -5 6.79 0.42
 2 11 -4 3.84 0.25
 -2 11 4 3.46 0.24
 2 11 -4 3.69 0.23
 -2 -11 4 3.84 0.23
 2 -11 -4 3.73 0.24
 2 -11 -4 3.75 0.24
 2 11 -3 65.84 4
 2 11 -3 67.98 4.08
 -2 11 3 67.89 4.01
 -2 -11 3 68.43 3.89
 2 -11 -3 68.36 3.9
 2 -11 -3 69.9 4.07
 2 11 -2 12.87 0.77
 -2 11 2 12.57 0.77
 2 11 -2 13.02 0.77
 2 -11 -2 12.67 0.78
 -2 -11 2 12.42 0.74
 2 -11 -2 13.19 0.75
 -2 11 1 11.63 0.68
 2 11 -1 10.99 0.68
 2 11 -1 11.19 0.68
 2 -11 -1 11.75 0.69
 -2 -11 1 10.79 0.65
 2 -11 -1 11.49 0.67
 -2 11 0 14.13 0.83
 2 11 0 13.75 0.83
 2 11 0 13.7 0.83
 2 -11 0 14.01 0.81
 2 -11 0 13.91 0.84
 -2 -11 0 13.61 0.8
 2 11 1 7.95 0.5
 -2 11 -1 7.88 0.49
 2 11 1 8.47 0.49
 2 -11 1 7.85 0.49
 -2 -11 -1 8.43 0.48
 2 -11 1 8.12 0.5
 2 11 2 0.03 0.02
 -2 11 -2 0 0.01
 2 11 2 0.06 0.04
 2 -11 2 0 0.01
 2 -11 2 0.01 0.01
 -2 -11 -2 0.01 0.01
 -2 11 -3 3.16 0.21
 2 11 3 3.58 0.22
 2 11 3 3.44 0.23
 -2 -11 -3 3.56 0.22
 2 -11 3 3.28 0.23
 2 -11 3 3.21 0.22
 2 11 4 0.25 0.06
 2 11 4 0.36 0.06
 -2 -11 -4 0.3 0.05
 2 -11 4 0.33 0.06
 -2 -11 -4 0.32 0.06
 2 -11 4 0.22 0.06
 2 11 5 0.98 0.1
 2 11 5 0.98 0.11
 2 -11 5 1.42 0.12
 -2 -11 -5 0.92 0.1
 -2 -11 -5 1 0.11
 2 -11 5 1.32 0.12
 2 11 6 0.8 0.1
 2 11 6 0.79 0.1
 2 -11 6 0.84 0.11
 2 -11 6 0.84 0.11
 -2 -11 -6 0.77 0.11
 -2 -11 -6 0.87 0.1
 2 11 7 0.17 0.07
 2 11 7 0.15 0.09
 -2 -11 -7 0.17 0.09
 2 -11 7 0.22 0.1
 -2 -11 -7 0.28 0.09
 2 11 8 0.01 0.03
 -2 11 -8 0.08 0.05
 -2 -11 -8 0.01 0.04
 -2 -11 -8 0.04 0.04
 2 -11 8 0.15 0.09
 2 11 9 0.29 0.12
 -2 11 -9 0.32 0.13
 -2 -11 -9 0.35 0.13
 2 -11 9 0.33 0.12
 2 12 -11 -0.02 0.05
 -2 -12 11 -0.01 0.03
 2 -12 -11 -0.02 0.05
 2 12 -10 0.29 0.12
 2 -12 -10 0.33 0.12
 -2 -12 10 0.29 0.1
 2 -12 -10 0.5 0.12
 2 12 -9 0.14 0.1
 2 -12 -9 0.02 0.04
 -2 -12 9 0.04 0.03
 2 -12 -9 0.2 0.09
 2 12 -8 0.15 0.09
 -2 12 8 0.03 0.02
 2 -12 -8 0.01 0.03
 2 -12 -8 0.08 0.04
 -2 -12 8 0.05 0.03
 -2 12 7 1.14 0.11
 2 12 -7 1.25 0.13
 -2 -12 7 1.08 0.11
 2 -12 -7 1.09 0.12
 2 -12 -7 1.2 0.12
 -2 12 6 2.2 0.16
 2 12 -6 1.89 0.17
 2 -12 -6 2.11 0.16
 2 -12 -6 2.13 0.16
 -2 -12 6 1.96 0.15
 -2 12 5 4.14 0.29
 2 12 -5 4.61 0.29
 2 -12 -5 4.36 0.29
 2 -12 -5 4.16 0.29
 -2 -12 5 4.58 0.28
 2 12 -4 0.14 0.05
 2 12 -4 0.1 0.03
 -2 -12 4 0.15 0.04
 2 -12 -4 0.03 0.02
 2 -12 -4 0.06 0.04
 -2 12 3 1.84 0.14
 2 12 -3 1.85 0.13
 2 12 -3 1.79 0.13
 2 -12 -3 1.94 0.14
 -2 -12 3 1.93 0.12
 2 -12 -3 1.88 0.13
 -2 12 2 0.94 0.08
 2 12 -2 1.06 0.08
 2 -12 -2 0.73 0.07
 2 -12 -2 0.79 0.08
 2 12 -1 0.41 0.04
 2 12 -1 0.42 0.05
 -2 12 1 0.41 0.05
 2 -12 -1 0.45 0.06
 2 -12 -1 0.36 0.04
 -2 -12 1 0.37 0.04
 -2 12 0 13.02 0.75
 2 12 0 11.7 0.75
 2 -12 0 12.97 0.73
 -2 -12 0 11.36 0.72
 2 -12 0 13.06 0.76
 2 12 1 0.32 0.03
 2 12 1 0.29 0.05
 -2 12 -1 0.26 0.04
 -2 -12 -1 0.23 0.04
 2 -12 1 0.37 0.05
 2 -12 1 0.31 0.05
 -2 12 -2 1.29 0.11
 2 12 2 1.99 0.11
 2 12 2 1.88 0.13
 2 -12 2 1.44 0.12
 2 -12 2 1.37 0.12
 -2 -12 -2 2.1 0.12
 -2 12 -3 0 0.01
 2 12 3 0.01 0.01
 2 -12 3 0.01 0.02
 -2 -12 -3 0.08 0.04
 2 -12 3 0.02 0.02
 2 12 4 5.73 0.38
 -2 -12 -4 6.19 0.38
 -2 -12 -4 5.73 0.37
 2 12 5 12.03 0.73
 -2 -12 -5 12.1 0.74
 -2 -12 -5 11.58 0.71
 2 -12 5 11.57 0.72
 2 -12 5 12.02 0.75
 2 12 6 5.63 0.35
 2 12 6 5.45 0.35
 -2 -12 -6 5.53 0.35
 -2 -12 -6 5.43 0.35
 2 -12 6 4.83 0.36
 2 -12 6 4.73 0.35
 2 12 7 1.47 0.14
 -2 12 -7 1.45 0.16
 2 12 7 1.29 0.13
 -2 -12 -7 1.32 0.14
 -2 -12 -7 1.49 0.15
 2 -12 7 1.53 0.15
 -2 12 -8 0.47 0.13
 2 -12 8 0.59 0.11
 -2 -12 -8 0.36 0.11
 -2 12 -9 0.51 0.13
 -2 -12 -9 0.38 0.13
 2 -12 9 0.36 0.11
 2 13 -11 0.01 0.06
 -2 -13 11 -0.01 0.03
 2 -13 -11 0 0.05
 2 13 -10 0.17 0.12
 2 -13 -10 -0.01 0.04
 2 -13 -10 -0.01 0.05
 -2 -13 10 0.01 0.03
 2 13 -9 0.02 0.04
 2 -13 -9 0.05 0.04
 -2 -13 9 0.05 0.03
 2 -13 -9 0.15 0.1
 2 13 -8 0.07 0.04
 -2 13 8 0.02 0.02
 2 -13 -8 0.09 0.08
 2 -13 -8 0.03 0.03
 -2 -13 8 0.12 0.07
 2 13 -7 1.07 0.14
 -2 13 7 1.78 0.14
 2 -13 -7 1.61 0.15
 2 -13 -7 1.78 0.14
 2 13 -6 0 0.03
 -2 13 6 0.02 0.01
 2 -13 -6 0.1 0.06
 2 -13 -6 0.08 0.05
 -2 -13 6 0.02 0.02
 -2 13 5 5.13 0.34
 2 13 -5 5.05 0.34
 2 -13 -5 5.38 0.34
 2 -13 -5 5.38 0.33
 -2 -13 5 4.87 0.32
 -2 13 4 4.03 0.28
 2 13 -4 4.32 0.26
 2 13 -4 4.2 0.28
 2 -13 -4 4.38 0.28
 -2 -13 4 4.12 0.26
 2 -13 -4 4.34 0.27
 -2 13 3 0.2 0.05
 2 13 -3 0.15 0.04
 2 13 -3 0.08 0.04
 2 -13 -3 0.15 0.03
 -2 -13 3 0.16 0.03
 2 -13 -3 0.19 0.05
 2 13 -2 0.1 0.03
 -2 13 2 0.07 0.04
 2 13 -2 0.09 0.04
 -2 -13 2 0.05 0.03
 2 -13 -2 0.05 0.04
 2 -13 -2 0.05 0.03
 2 13 -1 89.83 5.34
 2 13 -1 90.93 5.42
 -2 13 1 93.05 5.34
 2 -13 -1 92 5.43
 2 -13 -1 91.4 5.19
 -2 -13 1 87.91 5.18
 2 13 0 11.09 0.69
 -2 13 0 11.49 0.68
 2 -13 0 11.22 0.67
 2 -13 0 11.68 0.69
 -2 -13 0 11.1 0.66
 2 13 1 8.33 0.51
 -2 13 -1 7.85 0.5
 -2 -13 -1 8.6 0.48
 2 -13 1 7.85 0.51
 2 -13 1 8.31 0.5
 2 13 2 0.86 0.09
 -2 13 -2 0.92 0.07
 2 -13 2 0.97 0.08
 2 -13 2 0.93 0.09
 -2 -13 -2 0.92 0.08
 2 13 3 1.21 0.11
 -2 13 -3 1.3 0.09
 2 -13 3 1.22 0.11
 2 -13 3 1.45 0.12
 -2 -13 -3 1.38 0.1
 -2 -13 -3 1.33 0.1
 2 13 4 4.58 0.31
 2 -13 4 4.55 0.3
 -2 -13 -4 4.58 0.29
 -2 -13 -4 4.48 0.29
 2 -13 4 4.63 0.31
 2 13 5 2.15 0.17
 -2 -13 -5 2.45 0.16
 2 -13 5 1.51 0.16
 -2 -13 -5 1.98 0.16
 2 13 6 0.15 0.07
 -2 -13 -6 0.04 0.04
 2 -13 6 0.26 0.09
 2 -13 6 0.16 0.08
 -2 -13 -6 0.13 0.08
 2 13 7 0.46 0.09
 -2 13 -7 0.45 0.12
 -2 -13 -7 0.17 0.1
 2 -13 7 0.37 0.11
 -2 13 -8 0.15 0.12
 -2 -13 -8 -0.01 0.03
 2 -13 8 0.01 0.04
 -2 13 -9 0.29 0.14
 2 -13 9 0.05 0.04
 -2 -13 -9 0.18 0.12
 2 14 -11 0.01 0.06
 2 -14 -11 -0.03 0.05
 -2 -14 11 0.02 0.04
 2 14 -10 0.33 0.13
 -2 -14 10 0.37 0.1
 2 -14 -10 0.31 0.12
 2 14 -9 0.05 0.05
 2 -14 -9 0.13 0.1
 -2 -14 9 0.04 0.03
 2 14 -8 0.21 0.09
 -2 14 8 0.23 0.07
 -2 -14 8 0.24 0.07
 2 -14 -8 0.24 0.09
 2 -14 -8 0.27 0.08
 2 14 -7 1.97 0.17
 -2 14 7 2.06 0.16
 2 -14 -7 1.76 0.16
 2 -14 -7 1.92 0.15
 -2 -14 7 1.82 0.15
 2 14 -6 0.24 0.07
 -2 14 6 0.08 0.06
 2 -14 -6 0.11 0.06
 2 -14 -6 0.16 0.07
 -2 -14 6 0.24 0.06
 2 14 -5 3.21 0.22
 -2 14 5 3.28 0.22
 2 -14 -5 3.05 0.21
 2 -14 -5 3.09 0.22
 -2 -14 5 3.2 0.21
 -2 14 4 1.03 0.1
 2 -14 -4 1.02 0.1
 2 -14 -4 1.04 0.09
 2 14 -3 0.46 0.06
 -2 14 3 0.45 0.07
 2 14 -3 0.6 0.06
 2 -14 -3 0.53 0.07
 2 -14 -3 0.59 0.05
 -2 -14 3 0.55 0.05
 -2 14 2 0.76 0.08
 2 14 -2 0.85 0.07
 2 14 -2 0.86 0.06
 2 -14 -2 0.66 0.08
 -2 -14 2 0.75 0.06
 2 -14 -2 0.62 0.06
 -2 14 1 4.51 0.29
 2 14 -1 4.4 0.27
 2 14 -1 4.69 0.29
 2 -14 -1 4.45 0.29
 -2 -14 1 4.39 0.27
 2 -14 -1 4.67 0.28
 -2 14 0 7.63 0.46
 2 -14 0 7.63 0.47
 2 -14 0 7.34 0.46
 -2 14 -1 4.63 0.29
 2 14 1 4.46 0.3
 2 -14 1 4.58 0.29
 -2 -14 -1 4.46 0.27
 2 -14 1 4.58 0.29
 -2 14 -2 0.88 0.07
 2 14 2 0.63 0.08
 -2 -14 -2 0.61 0.07
 2 -14 2 0.94 0.08
 -2 -14 -2 0.69 0.06
 2 -14 2 0.96 0.09
 2 14 3 0.56 0.08
 -2 14 -3 0.73 0.06
 2 -14 3 0.51 0.08
 2 -14 3 0.64 0.08
 -2 -14 -3 0.58 0.07
 -2 -14 -3 0.63 0.06
 2 14 4 2.67 0.18
 -2 -14 -4 2.48 0.17
 2 -14 4 2.04 0.17
 2 -14 4 2.15 0.18
 2 14 5 3.2 0.24
 -2 -14 -5 3.28 0.23
 2 -14 5 3.17 0.24
 2 -14 5 3.24 0.24
 2 14 6 5.98 0.42
 2 -14 6 7.14 0.43
 2 -14 6 7.33 0.44
 -2 -14 -6 5.79 0.41
 2 14 7 2.12 0.19
 -2 14 -7 2.68 0.22
 -2 -14 -7 2.34 0.2
 2 -14 7 2.62 0.21
 -2 14 -8 0.33 0.12
 -2 -14 -8 0.5 0.12
 2 -14 8 0.5 0.12
 -2 14 -9 0.07 0.06
 2 -14 9 0.18 0.12
 -2 -14 -9 0.06 0.05
 2 15 -10 0.31 0.12
 -2 -15 10 0.3 0.1
 2 -15 -10 0.44 0.13
 2 15 -9 0.25 0.12
 -2 -15 9 0.12 0.08
 2 -15 -9 0.27 0.11
 2 15 -8 -0.03 0.04
 -2 15 8 0 0.01
 -2 -15 8 0 0.02
 2 -15 -8 -0.01 0.03
 -2 15 7 0.36 0.08
 2 15 -7 0.35 0.09
 2 -15 -7 0.32 0.09
 2 -15 -7 0.38 0.07
 -2 -15 7 0.38 0.07
 2 15 -6 0.19 0.08
 2 -15 -6 0.16 0.06
 -2 -15 6 0.31 0.06
 2 -15 -6 0.15 0.07
 -2 15 5 5.76 0.39
 2 15 -5 6.41 0.39
 2 -15 -5 5.62 0.38
 -2 -15 5 6.3 0.37
 2 -15 -5 5.76 0.38
 -2 15 4 0.43 0.07
 2 15 -4 0.51 0.06
 2 15 -4 0.47 0.05
 -2 -15 4 0.5 0.06
 2 -15 -4 0.51 0.06
 2 -15 -4 0.4 0.08
 -2 15 3 28.09 1.65
 2 15 -3 27.45 1.66
 2 15 -3 26.39 1.64
 2 -15 -3 28.4 1.66
 2 -15 -3 28.94 1.61
 -2 -15 3 26.6 1.59
 -2 15 2 4.13 0.28
 2 15 -2 4.34 0.28
 2 15 -2 4.52 0.27
 2 -15 -2 4.25 0.27
 2 -15 -2 4.61 0.28
 -2 -15 2 4.28 0.26
 2 15 -1 1.85 0.14
 -2 15 1 1.78 0.14
 -2 -15 1 1.85 0.12
 2 -15 -1 1.78 0.14
 2 -15 -1 1.75 0.12
 -2 15 0 4.31 0.27
 2 15 0 4.29 0.28
 -2 -15 0 4.07 0.25
 2 -15 0 4.2 0.27
 2 -15 0 4.03 0.27
 2 15 1 65.49 3.79
 -2 15 -1 64.23 3.78
 -2 -15 -1 65.07 3.67
 2 -15 1 63.87 3.68
 2 -15 1 62.44 3.85
 -2 15 -2 1.14 0.09
 2 15 2 1.07 0.1
 2 -15 2 0.99 0.09
 -2 -15 -2 1.12 0.09
 2 -15 2 0.99 0.1
 -2 15 -3 0.07 0.04
 2 15 3 0.16 0.06
 2 -15 3 0.01 0.02
 -2 -15 -3 0.12 0.05
 2 -15 3 0.05 0.02
 2 15 4 1.36 0.13
 -2 -15 -4 1.41 0.12
 2 -15 4 1.49 0.14
 2 -15 4 1.52 0.13
 2 15 5 0.53 0.09
 -2 -15 -5 0.28 0.08
 2 -15 5 0.34 0.08
 2 -15 5 0.31 0.09
 2 15 6 0.32 0.09
 2 -15 6 0.35 0.09
 -2 -15 -6 0.22 0.08
 2 -15 6 0.26 0.08
 2 15 7 0.12 0.08
 -2 15 -7 0.15 0.11
 -2 -15 -7 0.08 0.04
 2 -15 7 0.04 0.04
 -2 15 -8 0.41 0.12
 -2 -15 -8 0.19 0.1
 2 -15 8 0.09 0.05
 -2 15 -9 -0.03 0.05
 2 -15 9 0.09 0.05
 -2 -15 -9 0.27 0.12
 2 16 -10 0.05 0.05
 2 -16 -10 0.18 0.12
 -2 -16 10 0.07 0.04
 -2 16 9 0.38 0.09
 2 16 -9 0.27 0.12
 -2 -16 9 0.31 0.09
 2 -16 -9 0.42 0.12
 -2 16 8 0.01 0.02
 2 16 -8 0.01 0.04
 -2 -16 8 -0.01 0.02
 2 -16 -8 0.02 0.03
 2 16 -7 0.32 0.09
 -2 16 7 0.49 0.08
 -2 -16 7 0.34 0.07
 2 -16 -7 0.32 0.09
 -2 16 6 2.76 0.22
 2 16 -6 3.25 0.22
 2 -16 -6 2.82 0.22
 -2 -16 6 3.03 0.2
 2 16 -5 0.08 0.06
 -2 16 5 0.02 0.02
 2 -16 -5 0 0.02
 -2 -16 5 0.02 0.02
 2 -16 -5 0.09 0.06
 2 16 -4 4.53 0.29
 -2 16 4 4.28 0.3
 2 16 -4 4.37 0.28
 2 -16 -4 4.5 0.28
 2 -16 -4 4.3 0.29
 -2 -16 4 4.37 0.28
 2 16 -3 5.22 0.33
 2 16 -3 5.19 0.33
 -2 16 3 4.93 0.34
 -2 -16 3 5.29 0.32
 2 -16 -3 5.6 0.34
 2 -16 -3 5.18 0.33
 2 16 -2 2.11 0.15
 2 16 -2 1.97 0.13
 -2 -16 2 2.03 0.13
 2 16 -1 1.8 0.13
 -2 16 1 1.64 0.13
 -2 -16 1 1.72 0.12
 2 -16 -1 1.84 0.12
 2 -16 -1 1.72 0.13
 2 16 0 29.78 1.75
 -2 16 0 29.16 1.75
 2 -16 0 29.5 1.77
 -2 -16 0 29.19 1.69
 2 -16 0 29.48 1.7
 2 16 1 4.15 0.28
 -2 16 -1 4.07 0.27
 2 -16 1 4.33 0.28
 2 -16 1 4.09 0.27
 -2 -16 -1 4.13 0.26
 2 16 2 9.67 0.65
 -2 16 -2 10.95 0.63
 2 -16 2 10.94 0.65
 2 -16 2 10.39 0.63
 -2 -16 -2 10.19 0.62
 -2 16 -3 1.45 0.11
 2 16 3 1.38 0.13
 2 -16 3 1.35 0.13
 2 -16 3 1.4 0.12
 -2 -16 -3 1.57 0.12
 2 16 4 9.24 0.59
 2 -16 4 9.44 0.59
 2 -16 4 9.46 0.58
 -2 -16 -4 9.13 0.56
 2 16 5 0.61 0.1
 -2 -16 -5 0.57 0.09
 2 -16 5 0.64 0.09
 2 -16 5 0.66 0.11
 2 16 6 0.16 0.09
 2 -16 6 0.23 0.08
 -2 -16 -6 0.24 0.08
 2 -16 6 0.23 0.09
 -2 16 -7 0.04 0.05
 2 16 7 0 0.02
 2 -16 7 -0.03 0.03
 -2 -16 -7 -0.01 0.03
 -2 16 -8 0.62 0.14
 -2 -16 -8 0.59 0.12
 2 -16 8 1.04 0.15
 -2 16 -9 0.15 0.13
 2 -16 9 0.16 0.12
 -2 -16 -9 0.17 0.12
 2 17 -10 0 0.05
 -2 -17 10 0.04 0.03
 2 -17 -10 0.05 0.05
 -2 17 9 0.12 0.09
 2 17 -9 0.1 0.05
 2 -17 -9 0.39 0.12
 -2 -17 9 0.25 0.09
 2 17 -8 -0.04 0.04
 -2 17 8 0.1 0.08
 -2 -17 8 0 0.03
 2 -17 -8 0 0.03
 -2 17 7 0.15 0.08
 2 17 -7 0.05 0.04
 -2 -17 7 0.04 0.02
 2 -17 -7 0.03 0.03
 -2 17 6 0.18 0.07
 2 17 -6 0.26 0.07
 2 -17 -6 0.25 0.08
 -2 -17 6 0.07 0.06
 -2 17 5 1.45 0.14
 2 17 -5 1.81 0.14
 -2 -17 5 1.69 0.13
 2 -17 -5 1.53 0.14
 2 17 -4 0.13 0.05
 -2 17 4 0.16 0.06
 2 17 -4 0.18 0.04
 -2 -17 4 0.08 0.05
 2 -17 -4 0.04 0.03
 2 17 -3 0.17 0.04
 2 17 -3 0.21 0.05
 2 -17 -3 0.15 0.06
 -2 -17 3 0.16 0.04
 2 17 -2 0.77 0.08
 -2 17 2 0.67 0.09
 2 -17 -2 0.81 0.09
 2 -17 -2 0.87 0.07
 -2 -17 2 0.84 0.07
 2 17 -1 7.29 0.43
 -2 17 1 6.72 0.43
 -2 -17 1 7.54 0.41
 2 -17 -1 6.48 0.42
 2 -17 -1 6.27 0.42
 -2 17 0 0.4 0.07
 2 17 0 0.54 0.08
 -2 -17 0 0.51 0.05
 2 -17 0 0.32 0.05
 2 -17 0 0.55 0.08
 -2 17 -1 6.59 0.42
 2 17 1 6.85 0.43
 2 -17 1 6.99 0.42
 2 -17 1 6.76 0.42
 -2 -17 -1 6.57 0.4
 -2 17 -2 0.19 0.05
 2 17 2 0.34 0.07
 2 -17 2 0.26 0.07
 -2 -17 -2 0.17 0.05
 2 -17 2 0.09 0.05
 2 17 3 0.46 0.08
 2 -17 3 0.17 0.06
 2 -17 3 0.24 0.07
 -2 -17 -3 0.35 0.06
 2 17 4 0.5 0.09
 2 -17 4 0.51 0.09
 -2 -17 -4 0.49 0.08
 2 -17 4 0.43 0.08
 2 17 5 0.89 0.12
 2 -17 5 0.65 0.11
 -2 -17 -5 0.93 0.1
 2 -17 5 0.62 0.1
 2 17 6 0.23 0.09
 -2 -17 -6 0.42 0.09
 2 -17 6 0.47 0.11
 2 -17 6 0.29 0.09
 2 17 7 0.37 0.1
 -2 17 -7 0.44 0.12
 -2 -17 -7 0.39 0.1
 2 -17 7 0.32 0.1
 -2 17 -8 0.04 0.05
 2 -17 8 0.03 0.04
 -2 -17 -8 0.15 0.1
 2 18 -10 -0.01 0.05
 2 -18 -10 -0.04 0.04
 -2 -18 10 -0.04 0.03
 -2 18 9 0.15 0.09
 2 18 -9 0.24 0.11
 -2 -18 9 0.06 0.04
 2 -18 -9 0.11 0.05
 -2 18 8 0.55 0.1
 2 18 -8 0.51 0.11
 -2 -18 8 0.53 0.09
 2 -18 -8 0.77 0.12
 -2 18 7 -0.01 0.02
 2 18 -7 -0.02 0.03
 -2 -18 7 0.02 0.02
 2 -18 -7 0.01 0.03
 -2 18 6 0.82 0.11
 2 18 -6 1.05 0.11
 -2 -18 6 0.91 0.1
 2 -18 -6 0.82 0.11
 -2 18 5 2.44 0.2
 2 18 -5 2.67 0.19
 2 -18 -5 2.53 0.2
 -2 -18 5 2.49 0.18
 -2 18 4 0.3 0.07
 2 18 -4 0.25 0.05
 -2 -18 4 0.17 0.05
 2 -18 -4 0.31 0.07
 2 18 -3 1.96 0.15
 -2 18 3 2.05 0.16
 2 -18 -3 2.18 0.16
 -2 -18 3 2.05 0.14
 -2 18 2 0.42 0.08
 2 18 -2 0.54 0.07
 -2 -18 2 0.56 0.06
 2 -18 -2 0.63 0.08
 2 18 -1 1.74 0.14
 -2 18 1 1.74 0.14
 2 -18 -1 1.7 0.14
 -2 -18 1 1.76 0.12
 -2 18 0 10.34 0.66
 2 18 0 11.27 0.66
 2 -18 0 10.16 0.65
 -2 -18 0 11.6 0.63
 2 -18 0 10.09 0.64
 -2 18 -1 2.37 0.17
 2 18 1 2.34 0.18
 2 -18 1 2.42 0.17
 2 -18 1 2.57 0.18
 -2 -18 -1 2.38 0.16
 2 18 2 5 0.33
 -2 18 -2 4.64 0.32
 2 -18 2 4.83 0.32
 -2 -18 -2 5.27 0.31
 2 -18 2 5.1 0.33
 2 18 3 1.58 0.14
 -2 -18 -3 1.45 0.12
 2 -18 3 1.52 0.13
 2 -18 3 1.57 0.14
 2 18 4 1.59 0.15
 2 -18 4 1.99 0.16
 2 -18 4 1.78 0.15
 -2 -18 -4 1.48 0.14
 2 18 5 0.93 0.13
 2 -18 5 0.86 0.12
 -2 -18 -5 0.93 0.11
 2 -18 5 1.01 0.11
 2 18 6 0 0.02
 -2 18 -6 -0.05 0.04
 -2 -18 -6 0.03 0.03
 2 -18 6 0.05 0.04
 -2 18 -7 0.34 0.12
 2 18 7 0.2 0.1
 2 -18 7 0.06 0.04
 -2 -18 -7 0.2 0.09
 -2 18 -8 0.28 0.13
 2 -18 8 0.18 0.11
 2 19 -10 -0.02 0.05
 2 -19 -10 -0.01 0.04
 -2 19 9 0.02 0.02
 2 19 -9 0.04 0.05
 2 -19 -9 0.01 0.04
 -2 -19 9 -0.03 0.03
 -2 19 8 0.01 0.02
 2 19 -8 0 0.04
 -2 -19 8 -0.02 0.02
 2 -19 -8 0.18 0.1
 2 19 -7 -0.01 0.03
 -2 19 7 0.13 0.08
 -2 -19 7 0.02 0.02
 2 -19 -7 0.07 0.04
 2 19 -6 0.14 0.07
 -2 19 6 0.2 0.08
 2 -19 -6 0.14 0.08
 -2 -19 6 0.09 0.06
 -2 19 5 3.1 0.24
 2 -19 -5 3.26 0.24
 -2 -19 5 3.67 0.23
 2 19 -4 0.46 0.07
 -2 19 4 0.4 0.08
 2 -19 -4 0.51 0.08
 -2 -19 4 0.43 0.07
 -2 19 3 2.61 0.23
 2 19 -3 3.86 0.22
 2 -19 -3 2.69 0.22
 -2 -19 3 3.7 0.21
 2 19 -2 4.39 0.29
 -2 19 2 4.35 0.29
 2 -19 -2 4.22 0.28
 -2 -19 2 4.19 0.27
 2 19 -1 3.5 0.24
 -2 19 1 3.42 0.25
 -2 -19 1 3.69 0.22
 2 -19 -1 3.46 0.24
 2 19 0 1.25 0.12
 -2 19 0 1.2 0.12
 -2 -19 0 1.26 0.1
 2 -19 0 1.3 0.12
 2 19 1 0.01 0.02
 -2 19 -1 -0.01 0.01
 2 -19 1 0 0.02
 -2 -19 -1 0 0.02
 2 -19 1 -0.01 0.02
 2 19 2 0 0.02
 -2 19 -2 0 0.01
 2 -19 2 0.01 0.02
 2 -19 2 0.11 0.07
 -2 -19 -2 0 0.02
 2 19 3 0.21 0.08
 2 -19 3 0.15 0.08
 2 -19 3 0.14 0.06
 -2 -19 -3 0.21 0.06
 2 19 4 2.16 0.19
 2 -19 4 2.09 0.17
 2 -19 4 2.37 0.18
 -2 -19 -4 2.14 0.17
 2 19 5 0.13 0.1
 2 -19 5 0.23 0.09
 2 -19 5 0.26 0.07
 -2 19 -6 0.01 0.04
 2 19 6 0 0.02
 -2 -19 -6 0.01 0.03
 2 -19 6 -0.01 0.03
 2 19 7 0.25 0.1
 -2 19 -7 0.08 0.05
 2 -19 7 0.04 0.04
 -2 -19 -7 0.16 0.09
 -2 19 -8 0.26 0.12
 2 -19 8 0.29 0.11
 -2 -19 -8 0.16 0.1
 2 -20 -9 0.24 0.12
 -2 20 8 0.16 0.09
 -2 -20 8 0.26 0.09
 2 -20 -8 0.23 0.11
 -2 20 7 2.37 0.2
 -2 -20 7 2.32 0.18
 2 -20 -7 2.71 0.21
 -2 20 6 1.44 0.15
 2 -20 -6 1.63 0.15
 -2 20 5 2.26 0.18
 2 -20 -5 2.18 0.18
 -2 -20 5 2.07 0.16
 -2 20 4 2.96 0.21
 -2 -20 4 2.45 0.19
 2 -20 -4 3.05 0.21
 2 20 -3 0.54 0.08
 -2 20 3 0.52 0.09
 2 -20 -3 0.56 0.08
 -2 -20 3 0.38 0.06
 2 20 -2 22.02 1.25
 -2 20 2 19.26 1.26
 -2 -20 2 22.8 1.21
 2 -20 -2 18.98 1.22
 2 20 -1 0.63 0.09
 -2 20 1 0.44 0.08
 -2 -20 1 0.55 0.06
 2 -20 -1 0.49 0.09
 2 20 0 3.04 0.22
 -2 20 0 3.02 0.22
 -2 -20 0 3.1 0.2
 2 -20 0 3.05 0.22
 2 20 1 0.63 0.09
 -2 20 -1 0.63 0.08
 -2 -20 -1 0.59 0.07
 2 -20 1 0.7 0.09
 2 20 2 8.85 0.53
 -2 20 -2 7.92 0.51
 2 -20 2 8.06 0.51
 -2 -20 -2 8.28 0.49
 2 -20 2 7.82 0.51
 2 20 3 1.18 0.13
 2 -20 3 1.45 0.13
 -2 -20 -3 1.21 0.11
 2 -20 3 1.24 0.11
 2 20 4 2.01 0.17
 2 -20 4 1.55 0.14
 -2 -20 -4 1.86 0.15
 2 -20 4 1.76 0.16
 2 20 5 1.5 0.16
 2 -20 5 1.49 0.15
 -2 -20 -5 1.42 0.13
 2 -20 5 1.24 0.13
 2 20 6 0.38 0.11
 -2 20 -6 0.47 0.11
 -2 -20 -6 0.45 0.09
 2 -20 6 0.46 0.12
 -2 20 -7 0.19 0.11
 2 20 7 0.36 0.11
 2 -20 7 0.28 0.11
 -2 20 -8 0.16 0.12
 2 20 8 0.03 0.03
 2 -20 8 0.02 0.04
 2 -21 -9 0.3 0.12
 2 -21 -8 0.24 0.11
 2 -21 -7 0.15 0.1
 -2 21 6 5.06 0.35
 2 -21 -6 5.02 0.35
 -2 21 5 0.77 0.12
 2 -21 -5 0.85 0.11
 -2 21 4 3.69 0.27
 2 -21 -4 3.73 0.26
 2 21 -3 0.51 0.07
 -2 21 3 0.45 0.08
 2 -21 -3 0.51 0.09
 2 21 -2 1.13 0.11
 -2 21 2 1.12 0.12
 2 -21 -2 0.99 0.11
 -2 21 1 0.37 0.08
 2 21 -1 0.37 0.08
 2 -21 -1 0.39 0.08
 2 21 0 0.7 0.09
 -2 21 0 0.48 0.08
 2 -21 0 0.52 0.09
 -2 21 -1 1.04 0.1
 2 21 1 1.09 0.12
 2 -21 1 1.04 0.12
 2 21 2 0.13 0.08
 2 -21 2 0.14 0.08
 2 21 3 0.27 0.09
 -2 -21 -3 0.2 0.06
 2 -21 3 0.28 0.08
 2 21 4 0.22 0.09
 2 -21 4 0.27 0.09
 -2 -21 -4 0.28 0.07
 2 -21 4 0.23 0.07
 2 21 5 0.16 0.1
 2 -21 5 0.08 0.04
 2 21 6 0.42 0.12
 -2 21 -6 0.1 0.05
 2 -21 6 0.13 0.1
 -2 21 -7 0.04 0.05
 2 21 7 0.03 0.03
 2 -21 7 0.15 0.11
 -2 21 -8 -0.02 0.05
 2 21 8 -0.01 0.02
 2 -21 8 0.04 0.04
 -2 22 9 0.27 0.11
 2 -22 -9 0.2 0.12
 -2 22 8 0.03 0.02
 2 -22 -8 0.04 0.04
 -2 22 7 0.66 0.12
 2 -22 -7 0.61 0.12
 -2 22 6 0.23 0.09
 2 -22 -6 0.17 0.09
 -2 22 5 0.7 0.11
 2 -22 -5 0.58 0.11
 -2 22 4 0.12 0.08
 2 -22 -4 0.17 0.08
 2 22 -3 1.11 0.11
 -2 22 3 1.34 0.13
 2 -22 -3 1.27 0.12
 -2 22 2 1.18 0.12
 2 22 -2 0.8 0.1
 2 -22 -2 1.1 0.11
 -2 22 1 0.58 0.09
 2 22 -1 0.52 0.09
 2 -22 -1 0.49 0.09
 2 22 0 5.28 0.34
 -2 22 0 5 0.34
 2 -22 0 5.04 0.34
 2 22 1 -0.01 0.02
 -2 22 -1 0 0.01
 2 -22 1 0 0.03
 2 22 2 0.47 0.1
 -2 22 -2 0.46 0.08
 2 -22 2 0.51 0.09
 2 -22 3 0.23 0.08
 2 22 4 0.01 0.02
 2 -22 4 0.02 0.03
 2 22 5 0.12 0.1
 2 -22 5 -0.01 0.03
 2 22 6 0.87 0.14
 2 -22 6 0.96 0.13
 2 22 7 0.03 0.03
 2 -22 7 -0.07 0.03
 -2 23 9 0.15 0.11
 2 -23 -9 0.07 0.04
 -2 23 8 -0.03 0.02
 2 -23 -8 -0.04 0.04
 -2 23 7 0.31 0.1
 2 -23 -7 0.01 0.04
 -2 23 6 -0.02 0.02
 2 -23 -6 -0.05 0.03
 -2 23 5 0.87 0.12
 2 -23 -5 0.71 0.11
 -2 23 4 0.76 0.11
 2 -23 -4 0.59 0.1
 2 23 -3 0.38 0.08
 -2 23 3 0.28 0.09
 2 -23 -3 0.22 0.08
 2 23 -2 5.22 0.35
 -2 23 2 5.21 0.36
 2 -23 -2 5.36 0.35
 2 23 -1 0.33 0.08
 -2 23 1 0.7 0.09
 2 -23 -1 0.52 0.09
 2 23 0 0.33 0.09
 -2 23 0 0.43 0.08
 2 -23 0 0.47 0.09
 -2 23 -1 0.2 0.07
 2 23 1 0.22 0.09
 2 -23 1 0.22 0.08
 -2 23 -2 0.52 0.08
 2 23 2 0.33 0.1
 2 -23 2 0.55 0.1
 2 23 3 1.49 0.15
 2 -23 3 1.19 0.14
 2 23 4 1.19 0.14
 2 -23 4 1.03 0.13
 2 23 5 0.01 0.02
 2 -23 5 0.04 0.04
 2 23 6 0.23 0.12
 2 -23 6 0.57 0.12
 2 23 7 0.16 0.12
 2 -23 7 0.39 0.12
 -2 24 8 0.05 0.03
 2 -24 -8 0.04 0.04
 -2 24 7 0 0.02
 2 -24 -7 0 0.04
 -2 24 6 0.95 0.13
 2 -24 -6 1 0.13
 -2 24 5 0.3 0.09
 2 -24 -5 0.15 0.09
 -2 24 4 -0.01 0.02
 2 -24 -4 0.01 0.03
 -2 24 3 0.2 0.09
 2 24 -3 0.2 0.07
 -2 24 2 0.12 0.09
 2 -24 -2 0.12 0.07
 -2 24 1 0.26 0.08
 2 24 -1 0.12 0.08
 2 -24 -1 0.34 0.08
 2 24 0 0.47 0.1
 -2 24 0 0.5 0.09
 2 -24 0 0.46 0.09
 -2 24 -1 0.01 0.02
 2 24 1 0 0.02
 2 -24 1 0.01 0.03
 -2 24 -2 0.17 0.08
 2 24 2 0.04 0.02
 2 -24 2 0.04 0.03
 2 -24 3 0.18 0.08
 2 24 4 1.42 0.16
 2 -24 4 1.07 0.13
 2 24 5 0.08 0.03
 2 -24 5 0.22 0.1
 2 24 6 0.25 0.11
 2 -24 6 0.36 0.12
 2 24 7 0.24 0.12
 2 -24 7 0.17 0.11
 -2 25 8 -0.01 0.03
 2 -25 -8 -0.01 0.04
 -2 25 7 0.02 0.02
 2 -25 -7 -0.01 0.04
 -2 25 6 0.03 0.02
 2 -25 -6 -0.03 0.03
 -2 25 5 0.52 0.12
 2 -25 -5 0.31 0.09
 -2 25 4 0.89 0.13
 2 -25 -4 0.82 0.11
 2 25 -3 0.12 0.07
 -2 25 3 0.28 0.1
 2 -25 -3 0.17 0.08
 2 25 -2 0.67 0.1
 -2 25 2 0.78 0.12
 2 -25 -2 0.57 0.1
 2 25 -1 0.57 0.1
 -2 25 1 0.61 0.1
 2 -25 -1 0.48 0.09
 2 25 0 0.74 0.12
 -2 25 0 0.86 0.11
 2 -25 0 0.8 0.11
 2 25 1 0 0.02
 -2 25 -1 0 0.02
 2 -25 1 0.02 0.03
 2 25 2 0.35 0.1
 2 -25 2 0.45 0.1
 2 25 3 0.18 0.1
 2 -25 3 0.08 0.04
 2 25 4 0 0.02
 2 -25 4 0.03 0.03
 2 -25 5 0.18 0.1
 2 25 6 -0.01 0.03
 2 -25 6 -0.02 0.04
 -2 26 7 0.79 0.14
 2 -26 -7 0.75 0.13
 -2 26 6 0.33 0.12
 2 -26 -6 0.4 0.11
 -2 26 5 0.29 0.11
 2 -26 -5 0.34 0.1
 -2 26 4 0.16 0.09
 2 -26 -4 0.14 0.09
 2 26 -3 0.1 0.07
 -2 26 3 0.02 0.02
 2 -26 -3 0.19 0.08
 2 26 -2 0.32 0.09
 -2 26 2 0.2 0.09
 2 -26 -2 0.2 0.08
 2 26 -1 0.16 0.09
 -2 26 1 0.18 0.09
 2 -26 -1 0.34 0.09
 -2 26 0 0.19 0.08
 2 26 0 0.18 0.1
 2 -26 0 0.06 0.03
 -2 26 -1 0.09 0.07
 2 26 1 0.03 0.02
 2 -26 1 0.03 0.03
 2 26 2 1.37 0.16
 2 -26 2 1.36 0.15
 2 26 3 0.4 0.11
 2 -26 3 0.22 0.1
 2 -26 4 0.21 0.1
 2 26 5 -0.05 0.02
 2 -26 5 0.04 0.04
 2 26 6 0.02 0.03
 2 -26 6 0.02 0.04
 2 -27 -7 0.17 0.11
 -2 27 6 1.44 0.17
 2 -27 -6 1.32 0.16
 -2 27 5 0.03 0.03
 2 -27 -5 -0.01 0.03
 -2 27 4 0.28 0.11
 -2 27 3 0.02 0.02
 2 -27 -3 0.02 0.03
 2 27 -2 0.24 0.09
 -2 27 2 0.25 0.1
 2 -27 -2 0.25 0.09
 2 27 -1 0.18 0.1
 -2 27 1 0.22 0.09
 2 -27 -1 0.23 0.09
 -2 27 0 0.02 0.02
 2 27 0 0.01 0.02
 2 -27 0 0 0.03
 2 27 1 -0.02 0.02
 -2 27 -1 0.01 0.02
 2 -27 1 0.03 0.03
 2 27 2 0.28 0.11
 2 -27 2 0.28 0.1
 2 27 3 0.32 0.11
 2 -27 3 0.19 0.1
 2 27 4 -0.01 0.02
 2 -27 4 0.04 0.04
 2 27 5 0.52 0.13
 2 -27 5 0.39 0.12
 2 27 6 0 0.03
 2 -27 6 -0.04 0.04
 -2 28 7 0.01 0.03
 2 -28 -7 0.01 0.04
 -2 28 6 0.97 0.15
 2 -28 -6 1.04 0.14
 -2 28 5 0.02 0.03
 2 -28 -5 0.01 0.03
 -2 28 4 0.43 0.12
 2 -28 -4 0.67 0.12
 -2 28 3 0.01 0.02
 2 -28 -3 -0.02 0.03
 -2 28 2 3.24 0.25
 2 28 -2 2.97 0.23
 2 -28 -2 2.76 0.23
 -2 28 1 0 0.02
 2 28 -1 0.03 0.02
 2 -28 -1 0.03 0.03
 2 28 0 1.11 0.14
 -2 28 0 0.92 0.13
 2 -28 0 0.88 0.13
 2 28 1 0.03 0.03
 -2 28 -1 -0.01 0.02
 2 -28 1 0.03 0.03
 2 28 2 0.03 0.03
 2 -28 2 -0.02 0.03
 2 28 3 0.18 0.12
 2 -28 3 0.34 0.11
 2 -28 4 0.38 0.11
 2 28 5 0.66 0.14
 2 -28 5 0.42 0.12
 -2 29 6 0.05 0.03
 2 -29 -6 0.03 0.04
 -2 29 5 0.69 0.15
 2 -29 -5 0.98 0.14
 -2 29 4 0.47 0.14
 2 -29 -4 0.36 0.11
 -2 29 3 1.25 0.17
 2 -29 -3 1.14 0.14
 2 29 -2 0.56 0.11
 -2 29 2 0.49 0.13
 2 -29 -2 0.56 0.11
 -2 29 1 3.89 0.29
 2 29 -1 4.08 0.29
 2 -29 -1 3.18 0.27
 2 29 0 0.29 0.12
 -2 29 0 0.2 0.1
 2 -29 0 0.1 0.04
 2 29 1 1.72 0.18
 -2 29 -1 1.23 0.15
 2 -29 1 1.38 0.15
 2 29 2 -0.03 0.02
 2 -29 2 -0.02 0.03
 2 29 3 0.01 0.03
 2 -29 3 0.08 0.04
 2 29 4 0.02 0.03
 2 -29 4 0.06 0.04
 2 29 5 0.21 0.12
 2 -29 5 0.37 0.12
 -2 30 5 0.54 0.14
 2 -30 -5 0.64 0.12
 -2 30 4 0.24 0.12
 2 -30 -4 0.09 0.04
 -2 30 3 0.26 0.12
 2 -30 -3 0.24 0.1
 -2 30 2 0.59 0.13
 2 30 -2 0.5 0.12
 2 -30 -2 0.32 0.11
 2 30 -1 0.36 0.12
 -2 30 1 0.55 0.13
 2 -30 -1 0.45 0.11
 2 30 0 0.39 0.13
 -2 30 0 0.19 0.11
 2 -30 0 0.18 0.1
 2 30 1 0.04 0.03
 2 -30 1 0.05 0.04
 2 30 2 -0.01 0.03
 2 -30 2 -0.02 0.03
 2 30 3 0.02 0.03
 2 -30 3 0.03 0.04
 2 30 4 0.36 0.14
 2 -30 4 0.22 0.11
 -2 31 5 0.01 0.03
 2 -31 -5 0.04 0.04
 -2 31 4 0.33 0.13
 2 -31 -4 0.25 0.11
 -2 31 3 1.34 0.17
 2 -31 -3 1.24 0.16
 -2 31 2 0.51 0.12
 2 31 -2 0.18 0.11
 2 -31 -2 0.21 0.1
 2 -31 -1 0.18 0.1
 -2 31 0 -0.01 0.02
 2 31 0 0.02 0.03
 2 -31 0 0.04 0.04
 2 31 1 -0.03 0.03
 2 -31 1 -0.04 0.03
 2 31 2 0.01 0.03
 2 -31 2 0.01 0.04
 2 31 3 0.02 0.03
 2 -31 3 0.07 0.04
 -2 32 4 0.18 0.12
 2 -32 -4 0.18 0.11
 -2 32 3 0.36 0.14
 2 -32 -3 0.19 0.11
 -2 32 2 0.79 0.15
 2 -32 -2 0.74 0.13
 2 32 -1 0.51 0.13
 -2 32 1 0.69 0.14
 2 -32 -1 0.53 0.12
 2 32 0 -0.02 0.03
 -2 32 0 0.01 0.02
 2 -32 0 0.05 0.04
 2 32 1 0.02 0.03
 2 -32 1 0.15 0.11
 2 32 2 0.28 0.14
 2 -32 2 0.27 0.12
 -2 33 3 0.89 0.16
 2 -33 -3 0.64 0.14
 -2 33 2 0.24 0.13
 2 -33 -2 0.06 0.04
 -2 33 1 0.03 0.03
 2 33 -1 -0.02 0.03
 2 -33 -1 -0.03 0.04
 2 33 0 0.03 0.03
 2 -33 0 0.04 0.04
 2 33 1 0.16 0.13
 2 -33 1 0.22 0.11
 3 0 -12 1.43 0.19
 -3 0 12 0.9 0.17
 3 0 -12 1.11 0.19
 -3 0 11 -0.02 0.04
 3 0 -11 -0.02 0.04
 3 0 -11 0.16 0.13
 3 0 -10 0.87 0.15
 3 0 -10 0.61 0.12
 -3 0 10 0.74 0.13
 -3 0 9 0.01 0.03
 3 0 -9 0 0.04
 3 0 -8 8.28 0.55
 -3 0 8 8.33 0.52
 -3 0 7 0.11 0.06
 -3 0 7 0.01 0.01
 3 0 -7 -0.04 0.03
 -3 0 6 9.93 0.59
 -3 0 6 9.98 0.59
 3 0 -6 9.66 0.62
 3 0 -5 0.08 0.05
 3 0 -5 0.05 0.04
 -3 0 5 0 0.01
 -3 0 4 9.5 0.56
 3 0 -4 9.32 0.55
 3 0 -4 9.17 0.58
 -3 0 3 0 0.01
 3 0 -3 -0.01 0.01
 3 0 -3 0.05 0.03
 3 0 -2 43.03 2.55
 3 0 -2 42.5 2.43
 -3 0 2 42.12 2.51
 3 0 -1 0.09 0.03
 3 0 0 53.34 3.03
 3 0 0 53.9 3.18
 -3 0 0 52.01 3.12
 3 0 1 0.03 0.03
 3 0 1 0.05 0.03
 -3 0 -1 0.14 0.03
 3 0 2 159.9 9.1
 3 0 2 158.29 9.54
 -3 0 -2 160.9 9.37
 -3 0 -3 0.01 0.01
 3 0 3 -0.01 0.02
 3 0 3 -0.01 0.01
 3 0 4 0.71 0.08
 -3 0 -4 0.74 0.07
 3 0 4 0.73 0.08
 3 0 5 0.01 0.03
 3 0 5 0.02 0.02
 -3 0 -5 0 0.01
 3 0 6 9.96 0.61
 3 0 6 9.98 0.64
 3 0 7 0.02 0.03
 3 0 7 -0.03 0.03
 -3 0 -8 0.16 0.11
 3 0 8 0.25 0.1
 -3 0 -9 0.04 0.06
 3 0 9 0.02 0.04
 3 1 -12 1.93 0.23
 3 1 -12 2.18 0.24
 -3 1 12 1.93 0.21
 -3 -1 12 2.28 0.22
 3 -1 -12 2.06 0.23
 3 -1 -12 1.8 0.22
 3 1 -11 0.01 0.04
 -3 1 11 0 0.04
 3 1 -11 0 0.06
 3 -1 -11 0.05 0.05
 3 -1 -11 -0.06 0.05
 -3 -1 11 0.03 0.04
 3 1 -10 0.74 0.15
 -3 1 10 0.61 0.12
 -3 -1 10 0.5 0.12
 3 -1 -10 0.6 0.12
 3 -1 -10 0.66 0.14
 -3 1 9 0.36 0.1
 3 1 -9 0.19 0.1
 3 -1 -9 0.32 0.09
 3 -1 -9 0.43 0.11
 -3 -1 9 0.4 0.09
 -3 1 8 8.61 0.53
 3 1 -8 8.47 0.56
 -3 -1 8 8.44 0.52
 3 -1 -8 8.55 0.53
 3 -1 -8 8.37 0.56
 3 1 -7 2.35 0.2
 -3 1 7 2.73 0.18
 -3 1 7 2.55 0.17
 3 -1 -7 2.66 0.2
 -3 -1 7 2.26 0.18
 3 -1 -7 2.65 0.19
 3 1 -6 9.5 0.6
 -3 1 6 9.67 0.57
 -3 1 6 9.7 0.58
 -3 -1 6 9.71 0.57
 -3 -1 6 9.72 0.57
 3 -1 -6 9.4 0.58
 3 -1 -6 9.11 0.6
 -3 1 5 12.89 0.72
 -3 1 5 13.91 0.71
 3 1 -5 10.74 0.74
 -3 -1 5 10.79 0.72
 -3 -1 5 10.78 0.7
 3 -1 -5 13.24 0.75
 3 1 -4 16.72 0.96
 3 1 -4 16.75 1.01
 -3 1 4 16.47 0.99
 3 -1 -4 16.46 1.01
 -3 -1 4 16.73 0.96
 3 -1 -4 16.73 0.96
 -3 -1 4 16.24 0.98
 -3 1 3 15.24 0.88
 3 1 -3 14.19 0.85
 3 1 -3 14.37 0.9
 -3 -1 3 14.18 0.88
 3 -1 -3 15.38 0.86
 3 -1 -3 15.34 0.9
 3 1 -2 19.85 1.19
 -3 1 2 19.4 1.16
 3 1 -2 19.85 1.13
 -3 -1 2 19.24 1.16
 3 -1 -2 19.75 1.13
 3 -1 -2 19.75 1.19
 3 1 -1 2.57 0.17
 3 1 -1 2.86 0.18
 3 -1 -1 2.97 0.18
 3 -1 -1 2.79 0.17
 3 1 0 0.37 0.04
 3 1 0 0.47 0.05
 -3 1 0 0.34 0.04
 -3 -1 0 0.32 0.04
 3 -1 0 0.39 0.05
 3 -1 0 0.36 0.04
 3 1 1 33.05 2.15
 3 1 1 35.8 2.05
 -3 1 -1 36.89 2.11
 -3 -1 -1 34.89 2.11
 3 -1 1 37.59 2.16
 3 -1 1 36.88 2.05
 3 1 2 10.7 0.64
 3 1 2 10.97 0.63
 3 1 2 10.39 0.66
 -3 1 -2 10.5 0.64
 3 -1 2 10.89 0.63
 3 -1 2 10.58 0.66
 -3 -1 -2 10.78 0.64
 -3 1 -3 7.97 0.45
 3 1 3 7.03 0.44
 3 1 3 6.7 0.47
 3 1 3 7.05 0.45
 -3 -1 -3 7.22 0.45
 3 -1 3 8.08 0.45
 3 -1 3 7.86 0.47
 3 1 4 0.39 0.06
 3 1 4 0.48 0.07
 -3 1 -4 0.49 0.05
 3 1 4 0.43 0.06
 3 -1 4 0.51 0.07
 3 -1 4 0.62 0.08
 -3 -1 -4 0.55 0.06
 3 1 5 1.8 0.14
 3 1 5 1.85 0.15
 -3 1 -5 1.69 0.13
 3 -1 5 1.59 0.14
 -3 -1 -5 1.89 0.13
 3 -1 5 1.58 0.15
 3 1 6 0.83 0.11
 3 1 6 0.91 0.11
 3 -1 6 0.86 0.11
 3 -1 6 0.93 0.11
 3 1 7 0.19 0.09
 3 1 7 0.4 0.09
 3 -1 7 0.13 0.09
 3 -1 7 0.17 0.08
 -3 1 -8 -0.02 0.05
 3 1 8 0.06 0.04
 3 -1 8 0.04 0.04
 -3 -1 -8 0.08 0.05
 -3 1 -9 0.05 0.06
 3 1 9 0.04 0.04
 -3 -1 -9 0.06 0.06
 3 -1 9 0.02 0.04
 3 2 -12 0.96 0.19
 3 -2 -12 1.23 0.19
 -3 2 11 -0.01 0.04
 3 2 -11 0.04 0.06
 -3 -2 11 0.02 0.04
 3 -2 -11 -0.04 0.04
 3 -2 -11 -0.01 0.05
 3 2 -10 -0.01 0.05
 3 -2 -10 0.27 0.11
 3 -2 -10 0.2 0.11
 -3 -2 10 0.18 0.1
 -3 2 9 2.52 0.21
 3 2 -9 2.64 0.23
 -3 -2 9 2.62 0.2
 3 -2 -9 2.63 0.22
 3 -2 -9 2.73 0.22
 3 2 -8 2.05 0.19
 -3 2 8 2.5 0.19
 -3 -2 8 2.05 0.17
 3 -2 -8 2.53 0.2
 3 -2 -8 2.41 0.19
 -3 2 7 1.37 0.11
 3 2 -7 1.46 0.14
 -3 2 7 1.47 0.13
 -3 -2 7 1.44 0.12
 3 -2 -7 1.38 0.13
 3 -2 -7 1.41 0.13
 -3 2 6 4.54 0.27
 -3 2 6 4.26 0.26
 3 2 -6 3.54 0.28
 -3 -2 6 3.66 0.25
 -3 -2 6 3.84 0.26
 3 -2 -6 4.3 0.28
 3 -2 -6 4.62 0.27
 3 2 -5 2.5 0.18
 -3 2 5 2.5 0.17
 -3 -2 5 2.63 0.17
 3 -2 -5 2.41 0.17
 3 -2 -5 2.57 0.18
 -3 -2 5 2.54 0.16
 3 2 -4 1.03 0.08
 3 2 -4 1.02 0.09
 -3 2 4 1.18 0.08
 -3 -2 4 0.86 0.08
 3 -2 -4 1.22 0.09
 -3 -2 4 1.04 0.08
 3 -2 -4 1.26 0.09
 -3 2 3 45.02 2.66
 3 2 -3 44.4 2.71
 3 2 -3 46.1 2.58
 3 -2 -3 45.35 2.71
 -3 -2 3 44.03 2.65
 3 -2 -3 45.66 2.58
 -3 2 2 3.17 0.2
 3 -2 -2 3.11 0.19
 3 -2 -2 3.1 0.2
 -3 2 1 26.52 1.56
 3 2 -1 26.5 1.59
 3 2 -1 25.73 1.51
 -3 -2 1 26.62 1.56
 3 -2 -1 26.27 1.59
 3 -2 -1 26.83 1.51
 3 2 0 25.42 1.61
 3 2 0 25.82 1.69
 -3 2 0 30.26 1.66
 3 -2 0 30.51 1.61
 3 -2 0 31.04 1.7
 -3 -2 0 25.83 1.66
 -3 2 -1 1.5 0.11
 3 2 1 1.59 0.11
 3 2 1 1.68 0.11
 3 2 1 1.7 0.12
 3 -2 1 1.49 0.11
 -3 -2 -1 1.55 0.11
 3 -2 1 1.53 0.12
 3 2 2 1.38 0.1
 3 2 2 1.42 0.11
 3 2 2 1.47 0.11
 3 2 3 0.06 0.04
 3 2 3 0.02 0.01
 3 2 3 0 0.01
 -3 2 -3 0.01 0.01
 3 -2 3 0 0.01
 3 -2 3 0.07 0.04
 3 2 4 9.92 0.62
 3 2 4 9.52 0.64
 -3 2 -4 10.66 0.61
 3 2 4 9.38 0.61
 3 -2 4 10.93 0.64
 3 -2 4 10.65 0.61
 3 2 5 13.9 0.82
 3 2 5 12.69 0.85
 3 2 5 14.36 0.82
 3 -2 5 13.45 0.85
 -3 -2 -5 14.17 0.82
 3 -2 5 13.36 0.82
 3 2 6 0.49 0.09
 3 2 6 0.6 0.09
 3 -2 6 0.18 0.08
 3 -2 6 0.24 0.08
 3 2 7 0.35 0.1
 3 2 7 0.34 0.09
 3 -2 7 0.41 0.09
 3 -2 7 0.46 0.09
 3 2 8 0.39 0.11
 -3 2 -8 0.27 0.13
 -3 -2 -8 0.31 0.12
 3 -2 8 0.34 0.11
 3 2 9 0.16 0.11
 -3 2 -9 0.08 0.06
 3 -2 9 0.08 0.05
 -3 -2 -9 0.28 0.14
 3 3 -12 4.88 0.39
 3 -3 -12 4.61 0.38
 -3 -3 12 5.01 0.36
 3 -3 -12 5.06 0.39
 3 3 -11 0.16 0.13
 -3 -3 11 0 0.04
 3 -3 -11 0.19 0.14
 3 -3 -11 0.03 0.05
 3 3 -10 1.7 0.19
 -3 3 10 1.72 0.17
 3 -3 -10 1.4 0.17
 -3 -3 10 1.66 0.16
 3 -3 -10 1.75 0.18
 -3 3 9 1.74 0.17
 3 3 -9 2.1 0.18
 3 -3 -9 1.55 0.17
 3 -3 -9 1.91 0.18
 -3 -3 9 1.82 0.16
 -3 3 8 1.42 0.13
 3 3 -8 1.39 0.15
 3 -3 -8 1.39 0.14
 3 -3 -8 1.39 0.14
 -3 -3 8 1.53 0.13
 -3 3 7 6.26 0.39
 -3 3 7 6.36 0.39
 3 -3 -7 6.17 0.41
 3 -3 -7 6.27 0.4
 3 3 -6 16.97 1.05
 -3 3 6 16.92 1.02
 -3 -3 6 17.2 1
 -3 -3 6 17.57 1.01
 3 -3 -6 17 1
 3 -3 -6 16.71 1.05
 3 3 -5 0.26 0.05
 -3 3 5 0.21 0.04
 -3 -3 5 0.21 0.04
 3 -3 -5 0.26 0.06
 -3 -3 5 0.23 0.03
 3 -3 -5 0.24 0.05
 3 3 -4 14.76 0.9
 -3 3 4 14.84 0.88
 -3 -3 4 14.9 0.88
 3 -3 -4 14.47 0.9
 3 -3 -4 14.5 0.86
 -3 -3 4 15 0.85
 3 3 -3 8.69 0.5
 3 3 -3 9.45 0.54
 -3 -3 3 7.88 0.52
 3 3 -2 5.92 0.37
 3 3 -2 5.88 0.34
 -3 3 2 5.76 0.36
 3 -3 -2 6.11 0.37
 -3 -3 2 5.89 0.36
 3 -3 -2 5.87 0.35
 3 3 -1 46.3 2.94
 3 3 -1 45.02 2.79
 -3 3 1 52.31 2.89
 3 -3 -1 52.12 2.81
 3 -3 -1 51.6 2.94
 -3 -3 1 47.22 2.89
 3 3 0 53.28 3.26
 3 3 0 55.41 3.1
 -3 3 0 54.06 3.2
 3 3 0 55.12 3.21
 -3 -3 0 54.85 3.2
 3 -3 0 53.94 3.11
 3 -3 0 54.31 3.26
 -3 3 -1 4.22 0.26
 3 -3 1 4.21 0.26
 3 -3 1 4.35 0.28
 -3 3 -2 1 0.08
 3 3 2 1.02 0.09
 3 3 2 1.03 0.08
 3 3 2 1.03 0.08
 3 -3 2 1.12 0.09
 3 -3 2 1.08 0.09
 -3 3 -3 3.39 0.23
 3 3 3 4.35 0.24
 3 3 3 4.43 0.25
 3 -3 3 3.24 0.23
 3 -3 3 3.15 0.24
 3 3 4 14.17 0.83
 -3 3 -4 14.02 0.83
 3 3 4 13.79 0.86
 3 3 4 13.97 0.82
 3 -3 4 13.39 0.82
 3 -3 4 13.79 0.86
 3 3 5 3.4 0.23
 3 3 5 3.14 0.22
 3 3 5 3.42 0.24
 3 3 6 1.56 0.14
 3 3 6 1.34 0.14
 3 -3 6 1.49 0.14
 3 -3 6 1.52 0.15
 3 -3 7 0.15 0.08
 3 -3 7 0.17 0.09
 3 3 8 0.83 0.13
 -3 3 -8 0.72 0.14
 3 -3 8 0.88 0.13
 -3 -3 -8 0.81 0.14
 3 3 9 0.48 0.13
 -3 3 -9 0.56 0.15
 3 -3 9 0.27 0.12
 -3 -3 -9 0.55 0.13
 3 4 -12 0.82 0.17
 3 -4 -12 0.86 0.17
 3 -4 -12 1.04 0.19
 3 4 -11 -0.02 0.05
 3 -4 -11 0 0.05
 -3 -4 11 0 0.03
 3 -4 -11 0.02 0.05
 3 4 -10 2.12 0.22
 3 -4 -10 2.63 0.22
 -3 -4 10 2.13 0.19
 3 -4 -10 2.4 0.22
 3 4 -9 1.48 0.16
 3 -4 -9 1.31 0.14
 -3 -4 9 1.26 0.13
 3 -4 -9 1.36 0.16
 3 4 -8 5.76 0.4
 -3 -4 8 5.97 0.37
 3 -4 -8 5.83 0.4
 3 -4 -8 5.91 0.39
 3 4 -7 3.14 0.24
 -3 4 7 3.25 0.21
 -3 -4 7 3.13 0.22
 3 -4 -7 3.14 0.23
 3 -4 -7 3.28 0.23
 3 4 -6 1.93 0.15
 -3 4 6 1.43 0.12
 -3 -4 6 1.91 0.13
 3 -4 -6 1.5 0.14
 -3 -4 6 1.83 0.11
 3 -4 -6 1.57 0.13
 3 4 -5 13.5 0.85
 -3 4 5 13.67 0.83
 3 -4 -5 14.21 0.82
 -3 -4 5 13.92 0.82
 3 -4 -5 14.01 0.86
 -3 -4 5 13.94 0.81
 3 4 -4 13.47 0.8
 -3 4 4 12.41 0.78
 3 -4 -4 12.32 0.79
 -3 -4 4 13.48 0.75
 3 -4 -4 12.33 0.76
 -3 -4 4 13.63 0.77
 -3 4 3 37.15 2.21
 3 4 -3 37.91 2.14
 3 4 -3 36.66 2.25
 -3 -4 3 38.51 2.14
 -3 -4 3 36.16 2.21
 3 -4 -3 37.94 2.15
 3 -4 -3 37.99 2.25
 -3 4 2 99.66 5.53
 3 4 -2 89.44 5.36
 3 4 -2 85.81 5.62
 3 -4 -2 103.75 5.63
 -3 -4 2 85.94 5.52
 3 -4 -2 100.19 5.37
 -3 4 1 25.66 1.53
 3 4 -1 25.47 1.55
 3 4 -1 26.32 1.53
 3 -4 -1 25.33 1.48
 3 -4 -1 26.23 1.56
 -3 -4 1 26.02 1.53
 3 4 0 50.25 2.81
 -3 4 0 44.28 2.8
 3 4 0 52.11 2.71
 3 4 0 51.45 2.85
 3 -4 0 43.63 2.85
 3 -4 0 43.62 2.72
 3 4 1 0.18 0.04
 3 4 1 0.31 0.04
 -3 4 -1 0.21 0.04
 3 4 1 0.25 0.03
 3 -4 1 0.23 0.04
 3 -4 1 0.24 0.04
 -3 4 -2 33.84 1.92
 3 4 2 31.59 1.86
 3 4 2 31.34 1.92
 3 4 2 30.61 1.95
 3 -4 2 33.02 1.87
 3 -4 2 34.34 1.96
 -3 4 -3 0.5 0.05
 3 4 3 0.56 0.06
 3 4 3 0.56 0.06
 3 4 3 0.58 0.06
 3 -4 3 0.58 0.07
 3 -4 3 0.57 0.07
 3 4 4 10.86 0.61
 3 4 4 11.65 0.6
 -3 4 -4 9.05 0.6
 3 4 4 10.69 0.63
 3 -4 4 8.82 0.6
 3 -4 4 8.97 0.63
 3 4 5 6.75 0.44
 3 4 5 6.88 0.42
 3 4 5 6.93 0.42
 3 -4 5 6.57 0.42
 3 -4 5 6.43 0.44
 3 4 6 2.55 0.19
 3 4 6 2.37 0.19
 3 -4 6 2.35 0.2
 3 -4 6 2.34 0.19
 3 4 7 0.3 0.09
 3 -4 7 0.48 0.1
 3 -4 7 0.39 0.1
 -3 4 -8 2.44 0.22
 3 4 8 2.23 0.2
 3 -4 8 2.35 0.21
 -3 -4 -8 2.13 0.21
 3 4 9 -0.01 0.04
 -3 4 -9 0.19 0.13
 -3 -4 -9 0.02 0.05
 3 -4 9 0.01 0.04
 3 5 -12 1.21 0.19
 -3 -5 12 1.26 0.17
 3 -5 -12 1.08 0.2
 3 -5 -12 0.92 0.18
 3 5 -11 0.01 0.06
 3 -5 -11 0.03 0.05
 -3 -5 11 -0.01 0.03
 3 -5 -11 0.25 0.13
 3 5 -10 0.29 0.12
 3 -5 -10 0.29 0.12
 3 -5 -10 0.24 0.11
 3 5 -9 1.6 0.16
 3 -5 -9 1.16 0.14
 -3 -5 9 1.45 0.13
 3 -5 -9 1.25 0.15
 3 5 -8 3.56 0.28
 -3 -5 8 3.84 0.25
 3 -5 -8 3.67 0.27
 3 -5 -8 3.71 0.27
 3 5 -7 2.04 0.17
 -3 5 7 1.78 0.14
 3 -5 -7 1.88 0.15
 -3 -5 7 2.09 0.15
 3 -5 -7 1.78 0.16
 3 5 -6 17.17 1.07
 -3 5 6 17.26 1.04
 3 -5 -6 17.71 1.07
 3 -5 -6 17.17 1.02
 -3 -5 6 16.95 1.01
 -3 -5 6 17.62 1.02
 3 5 -5 7.94 0.49
 -3 -5 5 7.42 0.46
 -3 -5 5 7.78 0.46
 3 5 -4 15.39 0.93
 -3 5 4 15.04 0.91
 3 -5 -4 14.81 0.89
 -3 -5 4 15.49 0.91
 -3 -5 4 15.23 0.88
 3 -5 -4 15.49 0.93
 -3 5 3 1.37 0.1
 3 5 -3 1.35 0.1
 -3 -5 3 1.37 0.1
 -3 -5 3 1.35 0.09
 3 -5 -3 1.51 0.1
 3 -5 -3 1.54 0.11
 -3 5 2 54.98 3.26
 3 5 -2 54.65 3.31
 3 5 -2 54.24 3.15
 3 -5 -2 57.62 3.32
 -3 -5 2 54.73 3.26
 3 -5 -2 55.92 3.17
 3 5 -1 4.29 0.32
 3 5 -1 5.59 0.32
 -3 5 1 4.8 0.32
 3 -5 -1 5.56 0.31
 3 -5 -1 5.58 0.33
 3 5 0 2.66 0.17
 3 5 0 2.56 0.18
 -3 5 0 2.7 0.17
 3 5 0 2.59 0.16
 3 -5 0 2.77 0.18
 3 -5 0 2.72 0.17
 -3 5 -1 30.4 2.03
 3 5 1 40.09 1.98
 3 5 1 39.53 2.08
 3 5 1 38.73 2.04
 3 -5 1 29.49 2.08
 3 -5 1 28.96 1.98
 3 5 2 35.98 2.04
 3 5 2 35.65 2.1
 3 5 2 34.78 2.14
 -3 5 -2 35.92 2.1
 3 -5 2 35.67 2.14
 3 -5 2 35.17 2.04
 -3 5 -3 0.28 0.04
 3 -5 3 0.35 0.06
 3 -5 3 0.2 0.05
 3 5 4 0.12 0.05
 3 5 4 0.08 0.05
 3 -5 4 0.12 0.05
 3 -5 4 0.07 0.06
 3 5 5 0.39 0.07
 3 5 5 0.43 0.08
 3 5 5 0.33 0.08
 3 -5 5 0.44 0.08
 3 -5 5 0.4 0.08
 3 5 6 0 0.03
 3 5 6 0.11 0.07
 3 -5 6 0.1 0.07
 3 -5 6 0.14 0.08
 3 5 7 3.04 0.24
 3 -5 7 3.5 0.26
 3 -5 7 3.44 0.25
 -3 -5 -7 3.16 0.26
 -3 5 -8 0.31 0.12
 3 5 8 0 0.04
 3 -5 8 0.02 0.04
 -3 -5 -8 0.05 0.05
 3 5 9 0.8 0.14
 -3 5 -9 1.05 0.16
 -3 -5 -9 1.15 0.17
 3 -5 9 0.89 0.14
 3 6 -12 0.63 0.17
 3 -6 -12 0.43 0.17
 -3 -6 12 0.65 0.14
 3 -6 -12 0.82 0.17
 3 6 -11 -0.03 0.06
 3 -6 -11 -0.06 0.05
 -3 -6 11 -0.01 0.03
 3 -6 -11 -0.02 0.05
 3 6 -10 0.3 0.12
 -3 -6 10 0.26 0.09
 3 -6 -10 0.3 0.12
 3 -6 -10 0.37 0.13
 3 6 -9 0.93 0.13
 -3 -6 9 0.93 0.11
 3 -6 -9 0.88 0.13
 3 -6 -9 0.8 0.13
 3 6 -8 4.65 0.3
 -3 6 8 3.75 0.26
 3 -6 -8 3.41 0.28
 3 -6 -8 3.55 0.29
 -3 -6 8 4.88 0.28
 -3 6 7 1.24 0.1
 3 6 -7 1.18 0.13
 3 -6 -7 1.15 0.12
 3 -6 -7 1.24 0.12
 -3 -6 7 1.24 0.11
 -3 6 6 1.96 0.15
 3 6 -6 2.54 0.17
 3 -6 -6 2.32 0.17
 -3 -6 6 2.29 0.15
 -3 -6 6 1.98 0.14
 3 6 -5 43.63 2.65
 -3 6 5 43.89 2.6
 -3 -6 5 44.5 2.52
 3 -6 -5 41.96 2.53
 -3 -6 5 45.97 2.59
 3 -6 -5 44.16 2.65
 -3 6 4 8.51 0.58
 3 6 -4 10.56 0.6
 -3 -6 4 10.78 0.56
 -3 -6 4 10.21 0.57
 3 -6 -4 8.57 0.57
 3 -6 -4 8.72 0.59
 3 6 -3 1.4 0.1
 -3 6 3 1.32 0.1
 3 -6 -3 1.35 0.1
 -3 -6 3 1.37 0.09
 3 -6 -3 1.3 0.1
 -3 -6 3 1.37 0.1
 3 6 -2 89.37 4.88
 3 6 -2 87.42 4.96
 -3 6 2 78.91 4.88
 3 -6 -2 77.38 4.74
 -3 -6 2 87 4.88
 3 -6 -2 77.85 4.96
 -3 6 1 8.46 0.5
 3 6 -1 8.39 0.51
 3 6 -1 8.31 0.51
 3 -6 -1 8.15 0.51
 3 -6 -1 8.26 0.49
 3 6 0 37.95 2.18
 3 6 0 38.47 2.07
 -3 6 0 36.05 2.15
 3 -6 0 34.93 2.19
 3 -6 0 34.36 2.09
 3 6 1 29.27 1.78
 -3 6 -1 30.22 1.75
 3 6 1 28.97 1.69
 3 6 1 29.49 1.75
 3 -6 1 29.34 1.7
 3 -6 1 30.26 1.79
 3 6 2 56.76 2.88
 -3 6 -2 47.04 2.96
 3 6 2 53.62 3.02
 3 6 2 53.7 2.97
 3 -6 2 45.08 3.02
 3 -6 2 45.47 2.88
 3 6 3 0.4 0.05
 3 6 3 0.36 0.05
 3 6 3 0.38 0.06
 -3 6 -3 0.45 0.04
 3 -6 3 0.38 0.06
 3 -6 3 0.41 0.06
 3 6 4 2.58 0.17
 -3 6 -4 2.12 0.15
 3 6 4 2.63 0.17
 3 6 4 2.62 0.17
 3 -6 4 2.12 0.17
 3 -6 4 2.17 0.18
 3 6 5 10.67 0.65
 3 6 5 10.96 0.64
 3 6 5 10.28 0.63
 3 -6 5 10.24 0.66
 3 -6 5 9.65 0.63
 3 6 6 5.31 0.34
 3 6 6 5.32 0.33
 3 6 6 5.36 0.33
 3 -6 6 4.57 0.34
 3 -6 6 4.13 0.33
 3 6 7 0.16 0.09
 -3 -6 -7 0.21 0.09
 3 -6 7 0.17 0.08
 3 -6 7 0.14 0.08
 -3 6 -8 0.22 0.12
 3 6 8 0.4 0.1
 3 -6 8 0.47 0.11
 -3 -6 -8 0.23 0.11
 -3 6 -9 0.01 0.05
 3 6 9 -0.05 0.04
 -3 -6 -9 0.24 0.13
 3 -6 9 0.06 0.04
 3 7 -12 1.59 0.21
 3 -7 -12 1.36 0.2
 -3 -7 12 1.55 0.18
 3 -7 -12 1.59 0.2
 3 7 -11 0.09 0.06
 3 -7 -11 0.08 0.06
 -3 -7 11 0.07 0.04
 3 -7 -11 0.08 0.05
 3 7 -10 0.3 0.12
 -3 -7 10 0.33 0.09
 3 -7 -10 0.3 0.12
 3 -7 -10 0.34 0.12
 3 7 -9 -0.02 0.04
 -3 -7 9 0.01 0.03
 3 -7 -9 0.03 0.04
 3 -7 -9 0.14 0.09
 3 7 -8 0.1 0.04
 -3 7 8 0.1 0.05
 -3 -7 8 0.18 0.07
 3 -7 -8 0.07 0.04
 3 -7 -8 0.04 0.03
 -3 7 7 1.22 0.1
 3 7 -7 0.9 0.11
 3 -7 -7 1.35 0.12
 3 -7 -7 1.29 0.12
 -3 -7 7 0.82 0.1
 3 7 -6 0.43 0.07
 -3 7 6 0.3 0.05
 3 -7 -6 0.31 0.06
 3 -7 -6 0.37 0.07
 -3 -7 6 0.45 0.06
 -3 7 5 4.39 0.29
 3 7 -5 4.63 0.31
 -3 -7 5 4.78 0.28
 -3 -7 5 4.96 0.29
 3 -7 -5 4.73 0.31
 3 -7 -5 4.28 0.29
 -3 7 4 12.58 0.77
 3 7 -4 12.44 0.78
 -3 -7 4 12.74 0.76
 -3 -7 4 12.79 0.74
 3 -7 -4 12.79 0.78
 3 -7 -4 12.99 0.75
 3 7 -3 13.41 0.93
 -3 7 3 16.88 0.92
 -3 -7 3 13.61 0.91
 3 -7 -3 17.76 0.9
 3 7 -2 17.56 1.07
 -3 7 2 17.38 1.06
 3 7 -2 18.37 1.06
 3 -7 -2 17.7 1.03
 3 -7 -2 17.81 1.08
 -3 7 1 7.58 0.47
 3 7 -1 6.88 0.47
 3 -7 -1 8.27 0.46
 3 -7 -1 8.06 0.48
 3 7 0 30.83 1.85
 3 7 0 30.93 1.87
 -3 7 0 31.22 1.84
 3 -7 0 30.76 1.79
 3 -7 0 32.03 1.88
 -3 -7 0 31.34 1.78
 3 7 1 10.86 0.59
 3 7 1 10.23 0.58
 -3 7 -1 8.83 0.58
 3 7 1 10.52 0.56
 3 -7 1 8.45 0.56
 3 -7 1 8.42 0.59
 -3 7 -2 1.05 0.09
 3 7 2 1.22 0.09
 3 7 2 1.11 0.1
 3 7 2 1.12 0.09
 3 -7 2 1.22 0.1
 3 -7 2 1.31 0.1
 -3 7 -3 0.54 0.05
 3 -7 3 0.67 0.08
 3 -7 3 0.58 0.07
 3 7 4 0.08 0.05
 3 7 4 0.02 0.02
 3 7 4 0.1 0.05
 3 -7 4 0.12 0.06
 3 -7 4 0.1 0.06
 3 7 5 5.98 0.37
 3 7 5 5.91 0.38
 3 7 5 5.8 0.39
 3 7 6 1.86 0.16
 3 7 6 1.92 0.15
 3 7 6 1.8 0.15
 3 -7 6 1.84 0.17
 3 -7 6 1.81 0.16
 3 7 7 0.22 0.09
 3 -7 7 0.19 0.09
 -3 -7 -7 0.28 0.1
 3 7 8 0.01 0.04
 -3 7 -8 0.2 0.11
 -3 -7 -8 0.22 0.1
 3 -7 8 0.15 0.09
 3 7 9 0.29 0.11
 -3 7 -9 0.33 0.14
 3 -7 9 0.2 0.12
 -3 -7 -9 0.32 0.13
 3 8 -11 0.19 0.15
 -3 -8 11 0.31 0.1
 3 -8 -11 0.25 0.13
 3 -8 -11 0.28 0.14
 3 8 -10 0.08 0.06
 3 -8 -10 0.19 0.12
 3 -8 -10 -0.02 0.04
 -3 -8 10 0.14 0.08
 3 8 -9 2.08 0.2
 -3 -8 9 2.16 0.18
 3 -8 -9 2.41 0.2
 3 -8 -9 2.33 0.2
 -3 8 8 0.1 0.05
 3 8 -8 0.16 0.09
 3 -8 -8 0.02 0.03
 3 -8 -8 0.04 0.04
 -3 -8 8 0.32 0.07
 -3 8 7 3.17 0.22
 3 8 -7 3.2 0.24
 3 -8 -7 3.3 0.23
 -3 -8 7 3.25 0.22
 3 -8 -7 3.17 0.24
 3 8 -6 0.17 0.07
 3 -8 -6 0 0.02
 3 -8 -6 0.08 0.05
 -3 -8 6 0.23 0.05
 -3 8 5 7.71 0.49
 3 8 -5 7.8 0.5
 -3 -8 5 8.06 0.48
 -3 -8 5 8.26 0.47
 3 -8 -5 7.99 0.5
 3 -8 -5 7.76 0.48
 -3 8 4 1.72 0.13
 3 8 -4 2.18 0.14
 3 -8 -4 1.92 0.14
 3 -8 -4 2.08 0.14
 -3 -8 4 1.74 0.13
 -3 -8 4 2.01 0.13
 3 8 -3 12.77 0.75
 -3 8 3 12.64 0.76
 3 8 -3 12.49 0.77
 -3 -8 3 12.38 0.75
 -3 -8 3 12.32 0.72
 3 -8 -3 12.89 0.77
 3 -8 -3 12.49 0.74
 3 8 -2 5.8 0.36
 3 8 -2 5.9 0.36
 3 8 -1 31.04 1.89
 3 8 -1 31.19 1.86
 -3 8 1 31.47 1.86
 3 -8 -1 31.5 1.81
 3 -8 -1 32 1.89
 3 8 0 112.02 6.28
 3 8 0 112.66 6.18
 -3 8 0 97.25 6.18
 -3 -8 0 112.65 5.99
 3 -8 0 96.48 6
 3 -8 0 99.94 6.29
 3 8 1 15.66 0.96
 3 8 1 15.79 0.95
 -3 8 -1 15.92 0.94
 3 8 1 15.82 0.91
 3 -8 1 16.08 0.97
 3 -8 1 15.83 0.93
 3 8 2 13.36 0.69
 3 8 2 13.51 0.7
 -3 8 -2 10.01 0.68
 3 -8 2 10.05 0.7
 3 -8 2 9.83 0.67
 3 8 3 20.9 1.24
 3 8 3 22.05 1.3
 3 8 3 21.08 1.28
 -3 8 -3 21.94 1.27
 3 -8 3 21.29 1.25
 3 -8 3 21.32 1.31
 3 8 4 12.25 0.71
 3 8 4 12.34 0.72
 3 8 4 12.53 0.69
 3 -8 4 10.47 0.73
 3 -8 4 10.34 0.69
 3 8 5 8.76 0.55
 3 8 5 8.6 0.53
 3 8 5 8.73 0.54
 3 -8 5 8.58 0.54
 3 -8 5 8.71 0.56
 3 8 6 0.39 0.08
 3 8 6 0.37 0.07
 3 -8 6 0.34 0.09
 3 -8 6 0.3 0.08
 3 8 7 1.48 0.14
 -3 -8 -7 1.4 0.15
 3 -8 7 1.35 0.15
 3 -8 7 1.26 0.15
 3 8 8 0.43 0.1
 -3 8 -8 0.42 0.12
 -3 -8 -8 0.55 0.12
 3 -8 8 0.55 0.12
 3 8 9 0.67 0.13
 -3 8 -9 0.28 0.14
 3 -8 9 0.43 0.12
 -3 -8 -9 0.53 0.14
 3 9 -11 0.67 0.16
 3 -9 -11 0.45 0.14
 3 -9 -11 0.53 0.15
 -3 -9 11 0.44 0.11
 3 9 -10 0.04 0.05
 -3 -9 10 0 0.03
 3 -9 -10 0.02 0.05
 3 -9 -10 0.03 0.04
 3 9 -9 0.04 0.04
 -3 -9 9 0.11 0.07
 3 -9 -9 0.09 0.04
 3 -9 -9 0.17 0.09
 3 9 -8 0.39 0.1
 -3 9 8 0.53 0.08
 3 -9 -8 0.52 0.1
 -3 -9 8 0.48 0.08
 3 -9 -8 0.47 0.09
 3 9 -7 1.09 0.13
 -3 9 7 1.17 0.11
 3 -9 -7 1.19 0.12
 3 -9 -7 1.03 0.11
 -3 -9 7 1.1 0.1
 3 9 -6 0.03 0.03
 -3 9 6 0.01 0.01
 -3 -9 6 0.07 0.04
 3 -9 -6 0.07 0.05
 3 -9 -6 0.06 0.05
 -3 9 5 0.1 0.05
 3 9 -5 0.31 0.06
 -3 -9 5 0.29 0.04
 -3 -9 5 0.23 0.03
 3 9 -4 0.02 0.02
 -3 9 4 0.01 0.01
 -3 -9 4 0.04 0.03
 3 -9 -4 0.07 0.04
 -3 -9 4 0.03 0.01
 3 -9 -4 0.2 0.04
 3 9 -3 1.54 0.11
 3 9 -3 1.46 0.1
 -3 -9 3 1.35 0.09
 3 9 -2 23.51 1.43
 -3 9 2 23.63 1.41
 3 9 -2 24.74 1.41
 -3 -9 2 23.19 1.36
 3 -9 -2 23.42 1.38
 3 -9 -2 24.16 1.44
 -3 9 1 4.5 0.29
 3 -9 -1 4.76 0.3
 3 -9 -1 4.63 0.29
 3 9 0 6.37 0.4
 3 9 0 6.48 0.4
 -3 9 0 6.84 0.4
 3 -9 0 6.53 0.39
 -3 -9 0 6.24 0.37
 3 -9 0 6.41 0.41
 3 9 1 61.75 3.88
 -3 9 -1 69.34 3.87
 3 9 1 64.97 3.94
 3 -9 1 66.48 3.95
 3 -9 1 67.01 3.77
 -3 -9 -1 65.5 3.76
 3 9 2 0.22 0.05
 3 9 2 0.12 0.04
 3 9 2 0.2 0.04
 -3 9 -2 0.21 0.04
 3 -9 2 0.15 0.05
 3 -9 2 0.19 0.05
 3 9 3 4.63 0.27
 3 9 3 4.34 0.28
 3 9 3 4.62 0.26
 -3 9 -3 3.9 0.26
 3 -9 3 3.93 0.27
 3 -9 3 3.73 0.28
 3 9 4 0.2 0.06
 3 9 4 0.21 0.05
 3 9 4 0.15 0.06
 3 -9 4 0.29 0.07
 3 -9 4 0.22 0.06
 3 9 5 1.7 0.15
 3 9 5 1.79 0.15
 3 9 5 1.85 0.15
 3 -9 5 2.03 0.16
 3 -9 5 2.02 0.16
 3 9 6 0.61 0.09
 3 9 6 0.51 0.08
 3 -9 6 0.6 0.1
 3 -9 6 0.51 0.09
 -3 -9 -6 0.5 0.09
 3 9 7 2.53 0.2
 -3 -9 -7 2.58 0.2
 3 -9 7 2.31 0.21
 3 -9 7 2.16 0.2
 -3 9 -8 0.02 0.05
 3 9 8 0 0.03
 3 -9 8 -0.01 0.03
 -3 -9 -8 0.02 0.05
 -3 9 -9 0.27 0.13
 3 9 9 0.33 0.12
 3 -9 9 0.36 0.11
 -3 -9 -9 0.39 0.13
 3 10 -11 0.06 0.06
 -3 -10 11 0 0.03
 3 -10 -11 0.02 0.06
 3 -10 -11 0.02 0.05
 3 10 -10 0.8 0.15
 3 -10 -10 1.04 0.15
 -3 -10 10 0.9 0.12
 3 -10 -10 0.78 0.13
 3 10 -9 0.31 0.12
 -3 -10 9 0.46 0.09
 3 -10 -9 0.44 0.1
 3 -10 -9 0.31 0.1
 3 10 -8 1.32 0.15
 -3 10 8 1.85 0.14
 3 -10 -8 1.67 0.15
 -3 -10 8 1.34 0.13
 3 -10 -8 1.77 0.15
 3 10 -7 5.38 0.37
 -3 10 7 5.68 0.36
 3 -10 -7 5.48 0.37
 -3 -10 7 5.63 0.35
 3 -10 -7 5.25 0.36
 3 10 -6 0.12 0.06
 -3 10 6 0.2 0.06
 -3 -10 6 0.13 0.05
 3 -10 -6 0.14 0.05
 3 -10 -6 0.09 0.06
 3 10 -5 0.08 0.05
 -3 10 5 0 0.01
 3 -10 -5 -0.01 0.02
 3 -10 -5 0.02 0.02
 -3 -10 5 0 0.01
 -3 -10 5 0.01 0.01
 3 10 -4 0.45 0.06
 -3 10 4 0.55 0.06
 3 -10 -4 0.48 0.07
 3 -10 -4 0.5 0.06
 -3 -10 4 0.51 0.05
 -3 -10 4 0.42 0.05
 -3 10 3 15.87 1
 3 10 -3 17 0.99
 3 10 -3 16.68 1.01
 3 -10 -3 16.94 1.01
 -3 -10 3 16.31 0.95
 3 -10 -3 16.87 0.97
 3 10 -2 4.3 0.25
 -3 10 2 3.6 0.25
 3 10 -2 3.65 0.25
 3 -10 -2 4.22 0.25
 3 -10 -2 4.15 0.26
 3 10 -1 64.4 3.87
 3 10 -1 66.44 3.82
 -3 10 1 64.2 3.82
 3 -10 -1 65.21 3.88
 3 -10 -1 63.73 3.71
 -3 10 0 10.75 0.67
 3 -10 0 11.33 0.66
 3 -10 0 11.21 0.68
 -3 10 -1 4.47 0.28
 3 10 1 4.37 0.28
 3 10 1 4.46 0.29
 3 -10 1 4.3 0.28
 3 -10 1 4.73 0.29
 -3 -10 -1 4.51 0.27
 3 10 2 0.53 0.07
 3 10 2 0.51 0.05
 3 10 2 0.56 0.06
 3 -10 2 0.54 0.07
 3 -10 2 0.66 0.07
 -3 -10 -2 0.6 0.06
 3 10 3 0.36 0.05
 3 10 3 0.29 0.05
 -3 10 -3 0.32 0.04
 3 10 3 0.35 0.06
 3 -10 3 0.19 0.06
 3 -10 3 0.34 0.06
 3 10 4 1.82 0.14
 3 10 4 1.77 0.15
 3 10 4 1.66 0.14
 3 -10 4 2.01 0.15
 3 -10 4 1.87 0.15
 3 10 5 4.52 0.31
 3 10 5 4.54 0.3
 3 10 5 4.59 0.31
 3 -10 5 4.75 0.31
 3 -10 5 4.74 0.32
 3 10 6 0.61 0.09
 3 10 6 0.63 0.1
 3 -10 6 0.88 0.11
 -3 -10 -6 0.65 0.1
 3 -10 6 0.97 0.12
 3 10 7 0.57 0.1
 3 -10 7 0.59 0.11
 3 -10 7 0.55 0.11
 -3 -10 -7 0.63 0.11
 3 10 8 0.03 0.04
 -3 10 -8 0.03 0.05
 3 -10 8 0.09 0.04
 -3 -10 -8 0.07 0.05
 3 10 9 0.01 0.04
 -3 10 -9 0.1 0.06
 -3 -10 -9 0.16 0.12
 3 -10 9 0.27 0.11
 3 11 -11 0.44 0.15
 -3 -11 11 0.51 0.11
 3 -11 -11 0.35 0.13
 3 -11 -11 0.51 0.14
 3 11 -10 0 0.05
 3 -11 -10 0.15 0.12
 -3 -11 10 0.21 0.09
 3 -11 -10 0.24 0.12
 3 11 -9 0.1 0.05
 3 -11 -9 0.15 0.09
 -3 -11 9 0.12 0.07
 3 -11 -9 0.25 0.1
 -3 11 8 3.49 0.23
 3 11 -8 3.34 0.25
 3 -11 -8 3.19 0.24
 -3 -11 8 3.05 0.23
 3 -11 -8 3.24 0.24
 3 11 -7 0.46 0.09
 -3 11 7 0.33 0.07
 -3 -11 7 0.34 0.06
 3 -11 -7 0.33 0.08
 3 -11 -7 0.41 0.08
 -3 11 6 4.11 0.28
 3 11 -6 4.41 0.29
 3 -11 -6 4.04 0.28
 3 -11 -6 4.17 0.28
 -3 -11 6 4.27 0.27
 3 11 -5 0.49 0.07
 3 -11 -5 0.76 0.08
 -3 -11 5 0.36 0.05
 -3 -11 5 0.38 0.05
 -3 11 4 2.76 0.2
 3 11 -4 2.8 0.19
 3 11 -4 2.81 0.18
 -3 -11 4 2.87 0.18
 3 -11 -4 2.86 0.19
 3 -11 -4 2.79 0.2
 -3 -11 4 2.84 0.18
 3 11 -3 0.59 0.06
 3 11 -3 0.64 0.06
 -3 11 3 0.57 0.06
 -3 -11 3 0.52 0.05
 3 -11 -3 0.51 0.07
 3 -11 -3 0.62 0.06
 -3 11 2 4.87 0.31
 3 11 -2 5 0.31
 3 11 -2 5.01 0.31
 3 -11 -2 4.94 0.31
 3 -11 -2 5 0.31
 -3 -11 2 4.88 0.29
 -3 11 1 10.78 0.65
 3 -11 -1 10.67 0.64
 3 -11 -1 10.66 0.66
 -3 11 0 2.3 0.16
 3 11 0 2.42 0.17
 3 11 0 2.3 0.15
 3 -11 0 2.4 0.16
 3 -11 0 2.32 0.16
 -3 -11 0 2.32 0.14
 -3 11 -1 6.8 0.43
 3 11 1 7.26 0.45
 3 11 1 7.43 0.44
 -3 -11 -1 7.28 0.42
 3 -11 1 6.91 0.45
 3 -11 1 6.82 0.43
 -3 11 -2 0.59 0.06
 3 11 2 0.55 0.07
 3 11 2 0.55 0.06
 3 -11 2 0.45 0.07
 -3 -11 -2 0.62 0.06
 3 -11 2 0.57 0.07
 -3 11 -3 3.11 0.19
 3 11 3 2.95 0.2
 3 11 3 2.87 0.21
 3 11 3 3.04 0.2
 3 -11 3 2.93 0.21
 -3 -11 -3 2.86 0.2
 3 -11 3 3.09 0.21
 3 11 4 0.14 0.05
 3 11 4 0.27 0.06
 3 -11 4 0.18 0.07
 -3 -11 -4 0.08 0.03
 3 -11 4 0.23 0.07
 3 11 5 0.87 0.1
 3 11 5 0.77 0.1
 3 -11 5 1.11 0.12
 3 -11 5 1.19 0.12
 3 11 6 0.65 0.09
 3 11 6 0.48 0.09
 3 -11 6 0.46 0.1
 3 -11 6 0.64 0.1
 -3 -11 -6 0.46 0.09
 3 11 7 0.27 0.09
 3 -11 7 0.22 0.09
 -3 -11 -7 0.26 0.09
 -3 -11 -7 0.13 0.09
 3 -11 7 0.06 0.04
 -3 11 -8 -0.01 0.05
 3 11 8 0.03 0.04
 3 -11 8 0.05 0.04
 -3 -11 -8 0.08 0.04
 -3 11 -9 0.05 0.06
 3 11 9 0.06 0.05
 -3 -11 -9 0.19 0.12
 3 -11 9 0.01 0.04
 3 12 -11 0.08 0.06
 -3 -12 11 0.04 0.04
 3 -12 -11 0.18 0.12
 3 -12 -11 0.19 0.12
 3 12 -10 -0.06 0.04
 3 -12 -10 0.14 0.11
 -3 -12 10 0.12 0.09
 3 -12 -10 0.03 0.04
 3 12 -9 0.02 0.04
 3 -12 -9 0.04 0.04
 3 -12 -9 0.06 0.04
 -3 -12 9 0.01 0.03
 3 12 -8 0.3 0.1
 -3 12 8 0.33 0.08
 -3 -12 8 0.34 0.08
 3 -12 -8 0.4 0.09
 3 -12 -8 0.56 0.1
 -3 12 7 0.02 0.01
 3 12 -7 0.03 0.03
 3 -12 -7 0 0.02
 -3 -12 7 0.03 0.02
 3 -12 -7 0.03 0.03
 3 12 -6 1.04 0.11
 -3 12 6 0.87 0.09
 3 -12 -6 0.94 0.1
 -3 -12 6 0.9 0.09
 3 -12 -6 1.09 0.1
 -3 12 5 10.66 0.67
 3 12 -5 11.43 0.68
 3 -12 -5 10.8 0.66
 -3 -12 5 10.87 0.65
 3 -12 -5 10.83 0.68
 -3 -12 5 10.98 0.64
 3 12 -4 4.17 0.29
 -3 12 4 4.97 0.31
 3 12 -4 4.42 0.3
 3 -12 -4 5.44 0.31
 -3 -12 4 4.18 0.28
 3 -12 -4 5.28 0.31
 -3 12 3 11.1 0.68
 3 12 -3 11.13 0.68
 3 12 -3 11.47 0.68
 3 -12 -3 11.09 0.67
 3 -12 -3 11.25 0.69
 -3 -12 3 10.97 0.65
 3 12 -2 26.25 1.57
 3 12 -2 25.81 1.59
 -3 12 2 26.34 1.57
 3 -12 -2 27.78 1.53
 -3 -12 2 26.07 1.51
 3 -12 -2 26.56 1.6
 3 12 -1 18.69 1.1
 3 12 -1 18.31 1.1
 -3 12 1 18.08 1.09
 3 -12 -1 17.92 1.11
 -3 -12 1 17.83 1.04
 3 -12 -1 18.79 1.07
 -3 12 0 0.29 0.05
 3 12 0 0.29 0.03
 3 12 0 0.37 0.06
 -3 -12 0 0.3 0.03
 3 -12 0 0.27 0.06
 3 -12 0 0.36 0.05
 -3 12 -1 0.47 0.06
 3 12 1 0.49 0.05
 3 12 1 0.48 0.07
 3 -12 1 0.42 0.06
 -3 -12 -1 0.5 0.05
 3 -12 1 0.52 0.06
 3 12 2 2.16 0.17
 3 12 2 2.34 0.16
 -3 12 -2 2.57 0.16
 3 -12 2 2.47 0.17
 3 -12 2 2.42 0.17
 -3 -12 -2 2.3 0.16
 3 12 3 0 0.01
 -3 12 -3 0 0.01
 3 12 3 0 0.02
 -3 -12 -3 0.01 0.02
 3 -12 3 0.01 0.02
 3 -12 3 0 0.02
 3 12 4 1.68 0.13
 3 12 4 1.6 0.14
 3 12 4 1.78 0.12
 3 -12 4 1.1 0.13
 -3 -12 -4 1.61 0.13
 3 12 5 0.13 0.07
 3 -12 5 0.16 0.08
 3 -12 5 0.02 0.03
 -3 -12 -5 0.16 0.07
 3 12 6 1.55 0.14
 3 12 6 1.52 0.14
 3 -12 6 1.61 0.16
 -3 -12 -6 1.58 0.14
 3 -12 6 1.61 0.16
 -3 -12 -6 1.37 0.14
 3 12 7 0.03 0.03
 3 -12 7 0.02 0.04
 -3 -12 -7 -0.04 0.03
 3 -12 7 0.05 0.04
 3 12 8 -0.01 0.03
 -3 12 -8 -0.03 0.06
 -3 -12 -8 0.03 0.04
 3 -12 8 0 0.04
 -3 12 -9 0.01 0.06
 -3 -12 -9 0 0.04
 3 -12 9 -0.02 0.04
 3 13 -11 0.01 0.06
 3 -13 -11 -0.01 0.05
 -3 -13 11 0.01 0.04
 3 13 -10 0.03 0.05
 -3 -13 10 0.03 0.03
 3 -13 -10 0.03 0.04
 3 -13 -10 0.05 0.04
 3 13 -9 0.17 0.1
 -3 13 9 0.25 0.07
 3 -13 -9 0.31 0.11
 -3 -13 9 0.16 0.07
 3 -13 -9 0.3 0.09
 -3 13 8 3.93 0.27
 3 13 -8 4.08 0.3
 3 -13 -8 3.83 0.28
 3 -13 -8 3.75 0.28
 -3 -13 8 3.99 0.27
 -3 13 7 0.61 0.09
 3 13 -7 0.76 0.11
 3 -13 -7 0.69 0.09
 -3 -13 7 0.85 0.09
 3 -13 -7 0.45 0.09
 -3 13 6 0 0.01
 3 13 -6 0.11 0.07
 3 -13 -6 0.01 0.03
 -3 -13 6 0.01 0.02
 3 -13 -6 0.01 0.02
 -3 13 5 2.23 0.17
 3 13 -5 2.21 0.17
 -3 -13 5 2.22 0.15
 3 -13 -5 2.25 0.17
 3 -13 -5 2.43 0.17
 -3 -13 5 2.1 0.15
 3 13 -4 0.6 0.06
 3 13 -4 0.63 0.07
 -3 13 4 0.6 0.08
 -3 -13 4 0.6 0.06
 3 -13 -4 0.64 0.08
 3 -13 -4 0.67 0.07
 3 13 -3 16.96 0.98
 3 13 -3 17.42 0.97
 -3 13 3 14.66 0.97
 3 -13 -3 15.08 0.95
 3 -13 -3 14.79 0.98
 -3 -13 3 17.41 0.93
 3 13 -2 9.46 0.58
 -3 13 2 9.38 0.58
 3 13 -2 9.69 0.58
 -3 -13 2 9.54 0.55
 3 -13 -2 9.46 0.59
 3 -13 -2 9.38 0.57
 -3 13 1 29.75 1.57
 3 13 -1 23.39 1.57
 3 13 -1 23.53 1.56
 -3 -13 1 23.09 1.5
 3 -13 -1 29.43 1.59
 3 -13 -1 28.92 1.53
 3 13 0 1.46 0.12
 3 13 0 1.4 0.09
 -3 13 0 1.54 0.11
 3 -13 0 1.46 0.11
 3 -13 0 1.39 0.12
 -3 -13 0 1.35 0.09
 -3 13 -1 14.13 0.86
 3 13 1 14.01 0.87
 3 13 1 14.5 0.87
 3 -13 1 14.57 0.88
 3 -13 1 14.47 0.85
 -3 -13 -1 14.5 0.83
 3 13 2 0.85 0.09
 3 13 2 1.06 0.08
 -3 13 -2 0.91 0.08
 -3 -13 -2 1.12 0.08
 3 -13 2 0.9 0.1
 3 -13 2 0.91 0.09
 3 13 3 1.53 0.13
 3 13 3 1.5 0.11
 -3 13 -3 1.4 0.11
 3 -13 3 1.45 0.13
 -3 -13 -3 1.47 0.11
 3 -13 3 1.5 0.13
 3 13 4 1.54 0.14
 -3 -13 -4 1.48 0.12
 3 -13 4 1.63 0.14
 3 -13 4 1.4 0.14
 3 13 5 7.78 0.49
 -3 -13 -5 7.63 0.47
 3 -13 5 7.6 0.49
 3 -13 5 7.39 0.5
 3 13 6 -0.02 0.02
 -3 -13 -6 0 0.03
 3 -13 6 0.01 0.03
 3 -13 6 0.13 0.08
 3 -13 7 0.01 0.03
 3 -13 7 0 0.03
 -3 -13 -7 0.02 0.04
 -3 13 -8 0 0.06
 3 -13 8 0.05 0.04
 -3 -13 -8 0.02 0.04
 -3 13 -9 0.05 0.06
 -3 -13 -9 0.09 0.05
 3 -13 9 0.04 0.04
 3 14 -11 0.11 0.06
 3 -14 -11 0.01 0.05
 -3 -14 11 0.06 0.04
 3 14 -10 0.03 0.05
 -3 -14 10 0.28 0.09
 3 -14 -10 0.05 0.05
 -3 14 9 1.26 0.13
 3 14 -9 1.37 0.17
 -3 -14 9 1.43 0.13
 3 -14 -9 1.5 0.15
 3 -14 -9 1.42 0.16
 3 14 -8 0.67 0.11
 -3 14 8 0.37 0.08
 -3 -14 8 0.58 0.08
 3 -14 -8 0.3 0.09
 3 -14 -8 0.27 0.08
 -3 14 7 5.31 0.35
 3 14 -7 5.49 0.37
 3 -14 -7 5.18 0.35
 3 -14 -7 5.36 0.36
 -3 -14 7 5.09 0.33
 -3 14 6 2.47 0.18
 3 14 -6 2.11 0.18
 3 -14 -6 2.66 0.18
 3 -14 -6 2.42 0.18
 -3 -14 6 1.95 0.16
 3 14 -5 14.7 0.86
 -3 14 5 13.67 0.85
 -3 -14 5 13.87 0.81
 3 -14 -5 13.66 0.86
 3 -14 -5 13.85 0.83
 -3 14 4 0.55 0.08
 3 -14 -4 0.63 0.07
 3 -14 -4 0.44 0.07
 -3 14 3 0.73 0.08
 3 14 -3 0.66 0.07
 3 14 -3 0.68 0.07
 3 -14 -3 0.76 0.07
 -3 -14 3 0.62 0.05
 3 -14 -3 0.73 0.08
 -3 14 2 38.16 2.09
 3 14 -2 32.79 2.11
 3 14 -2 33.04 2.09
 3 -14 -2 37.85 2.12
 -3 -14 2 32.25 2.01
 3 -14 -2 37.6 2.04
 3 14 -1 20.91 1.25
 -3 14 1 21.29 1.25
 3 14 -1 20.85 1.25
 3 -14 -1 20.98 1.26
 -3 -14 1 20.75 1.19
 3 -14 -1 20.14 1.22
 -3 14 0 20.29 1.21
 3 14 0 20.49 1.22
 3 -14 0 19.84 1.23
 -3 -14 0 20.29 1.16
 3 -14 0 20.36 1.19
 3 14 1 0.09 0.05
 -3 14 -1 0.07 0.05
 -3 -14 -1 0.1 0.03
 3 -14 1 0.03 0.02
 3 -14 1 0.1 0.06
 -3 14 -2 1.09 0.1
 3 14 2 1.41 0.12
 -3 -14 -2 1.5 0.1
 3 -14 2 1.1 0.11
 3 -14 2 0.9 0.11
 -3 14 -3 0.17 0.04
 3 14 3 0.11 0.06
 -3 -14 -3 0.14 0.05
 3 -14 3 0.25 0.07
 3 -14 3 0.12 0.07
 3 14 4 0.03 0.02
 3 -14 4 0.33 0.08
 3 -14 4 0.34 0.09
 -3 -14 -4 0.11 0.06
 3 14 5 1.13 0.13
 3 -14 5 1.19 0.14
 -3 -14 -5 1.17 0.12
 3 -14 5 1.3 0.13
 3 14 6 0.03 0.02
 3 -14 6 0.02 0.04
 -3 -14 -6 0.01 0.03
 3 -14 6 0.04 0.03
 3 14 7 0 0.02
 3 -14 7 0.01 0.04
 -3 -14 -7 0.01 0.03
 3 -14 7 0.04 0.04
 -3 14 -8 0.03 0.06
 -3 -14 -8 -0.04 0.03
 3 -14 8 -0.03 0.04
 3 15 -11 -0.04 0.05
 -3 -15 11 -0.02 0.03
 3 -15 -11 0.01 0.05
 3 15 -10 0.08 0.06
 3 -15 -10 0.15 0.11
 -3 -15 10 0.12 0.08
 3 15 -9 0.68 0.13
 -3 15 9 0.75 0.1
 -3 -15 9 0.59 0.1
 3 -15 -9 0.69 0.12
 3 15 -8 0.62 0.11
 -3 15 8 0.6 0.09
 3 -15 -8 0.56 0.09
 -3 -15 8 0.56 0.09
 3 -15 -8 0.58 0.11
 -3 15 7 3.82 0.27
 3 15 -7 4.01 0.28
 3 -15 -7 3.68 0.27
 3 -15 -7 3.44 0.26
 -3 -15 7 4 0.25
 -3 15 6 2.26 0.18
 3 15 -6 2.38 0.18
 -3 -15 6 2.34 0.16
 3 -15 -6 2.31 0.18
 3 -15 -6 2.28 0.17
 -3 15 5 0.71 0.09
 3 -15 -5 0.75 0.08
 3 -15 -5 0.83 0.1
 3 15 -4 0.46 0.06
 -3 15 4 0.37 0.07
 3 15 -4 0.45 0.06
 3 -15 -4 0.43 0.08
 -3 -15 4 0.39 0.05
 3 -15 -4 0.45 0.06
 3 15 -3 1.14 0.09
 3 15 -3 1.16 0.1
 -3 15 3 1.57 0.11
 -3 -15 3 1.04 0.08
 3 15 -2 0.15 0.05
 3 15 -2 0.11 0.03
 -3 -15 2 0.06 0.03
 3 -15 -2 0.11 0.05
 3 -15 -2 0.07 0.04
 -3 15 1 9.68 0.62
 3 15 -1 10.48 0.62
 3 -15 -1 9.78 0.6
 -3 -15 1 10.35 0.58
 3 -15 -1 9.77 0.62
 3 15 0 1.67 0.14
 -3 15 0 1.92 0.14
 3 -15 0 1.83 0.13
 3 -15 0 1.89 0.15
 -3 -15 0 1.74 0.12
 3 15 1 30.17 1.87
 -3 15 -1 31.34 1.86
 3 -15 1 32.27 1.9
 3 -15 1 32.53 1.83
 -3 -15 -1 30.8 1.8
 3 15 2 0.22 0.06
 -3 15 -2 0.12 0.05
 3 -15 2 0.22 0.06
 -3 -15 -2 0.23 0.05
 3 15 3 8.53 0.54
 -3 -15 -3 8.39 0.51
 3 -15 3 8.79 0.55
 3 -15 3 8.57 0.53
 3 15 4 0.31 0.08
 3 -15 4 0.19 0.08
 -3 -15 -4 0.3 0.07
 3 -15 4 0.3 0.08
 3 -15 5 0.24 0.08
 3 -15 5 0.16 0.09
 3 15 6 0.26 0.09
 -3 -15 -6 0.23 0.08
 3 -15 6 0.29 0.1
 3 -15 6 0.25 0.09
 3 15 7 0.76 0.11
 3 -15 7 0.68 0.12
 -3 -15 -7 0.69 0.12
 3 -15 7 0.83 0.13
 -3 15 -8 -0.04 0.05
 3 -15 8 -0.01 0.04
 -3 -15 -8 0.04 0.04
 3 16 -10 0.16 0.12
 3 -16 -10 0.03 0.05
 -3 16 9 0.02 0.02
 3 16 -9 0.04 0.05
 3 -16 -9 0 0.04
 -3 -16 9 0 0.03
 3 16 -8 1.34 0.15
 -3 16 8 1.14 0.13
 -3 -16 8 1.24 0.12
 3 -16 -8 1.41 0.15
 -3 16 7 0.93 0.11
 3 16 -7 0.98 0.12
 3 -16 -7 0.93 0.12
 -3 -16 7 0.87 0.1
 -3 16 6 1.98 0.16
 3 16 -6 2.13 0.16
 -3 -16 6 1.93 0.14
 3 -16 -6 1.89 0.16
 3 -16 -6 1.84 0.15
 -3 16 5 0.2 0.07
 3 16 -5 0.3 0.06
 3 -16 -5 0.23 0.08
 3 -16 -5 0.28 0.06
 -3 -16 5 0.31 0.05
 3 16 -4 4.05 0.28
 3 16 -4 3.6 0.27
 -3 16 4 4.6 0.29
 -3 -16 4 3.94 0.26
 3 -16 -4 4.72 0.28
 3 -16 -4 4.75 0.29
 3 16 -3 18.02 1.08
 3 16 -3 18.13 1.07
 -3 16 3 17.24 1.07
 3 -16 -3 17.3 1.08
 3 -16 -3 17.28 1.05
 -3 -16 3 18.49 1.03
 -3 16 2 8.73 0.54
 3 -16 -2 8.81 0.53
 3 -16 -2 8.19 0.52
 -3 16 1 13.8 0.85
 3 16 -1 13.99 0.85
 3 -16 -1 13.9 0.85
 3 -16 -1 14.01 0.83
 -3 -16 1 13.89 0.8
 3 16 0 1.52 0.14
 -3 16 0 2.04 0.14
 3 -16 0 1.85 0.14
 3 -16 0 1.92 0.15
 -3 -16 0 1.62 0.11
 -3 16 -1 3.23 0.21
 3 16 1 3.09 0.22
 3 -16 1 2.99 0.22
 3 -16 1 3.22 0.22
 -3 -16 -1 3.12 0.2
 -3 16 -2 3.32 0.21
 3 16 2 3.03 0.23
 -3 -16 -2 3.34 0.21
 3 -16 2 3 0.23
 3 -16 2 3.25 0.23
 3 16 3 0.61 0.09
 3 -16 3 0.52 0.1
 -3 -16 -3 0.36 0.07
 3 -16 3 0.65 0.09
 3 16 4 4.25 0.3
 -3 -16 -4 4.3 0.28
 3 -16 4 4.28 0.3
 3 -16 4 4.13 0.29
 3 16 5 0.58 0.1
 3 -16 5 0.47 0.1
 3 -16 5 0.58 0.1
 -3 -16 -5 0.49 0.09
 3 16 6 0.38 0.09
 3 -16 6 0.37 0.11
 -3 -16 -6 0.39 0.09
 3 -16 6 0.42 0.11
 3 16 7 0.01 0.02
 3 -16 7 0.02 0.04
 -3 -16 -7 0.02 0.03
 3 -16 7 0.05 0.04
 -3 16 -8 -0.01 0.05
 3 -16 8 -0.03 0.04
 -3 -16 -8 0.15 0.1
 3 17 -10 0.03 0.05
 3 -17 -10 -0.02 0.04
 3 17 -9 0.78 0.14
 -3 17 9 0.64 0.1
 3 -17 -9 0.91 0.13
 -3 17 8 0.04 0.02
 3 17 -8 0.01 0.04
 3 -17 -8 0.07 0.04
 3 17 -7 3.49 0.26
 -3 17 7 3.66 0.26
 -3 -17 7 3.3 0.24
 3 -17 -7 3.68 0.26
 3 17 -6 0.9 0.1
 -3 17 6 0.81 0.11
 3 -17 -6 0.88 0.11
 -3 -17 6 0.85 0.09
 3 17 -5 1.66 0.12
 -3 17 5 1.09 0.13
 -3 -17 5 1.47 0.11
 3 -17 -5 1.07 0.13
 3 17 -4 0.48 0.06
 -3 17 4 0.37 0.07
 3 17 -4 0.34 0.06
 3 -17 -4 0.37 0.08
 3 -17 -4 0.38 0.05
 3 17 -3 6.25 0.36
 -3 17 3 5.31 0.37
 3 -17 -3 5.5 0.36
 3 -17 -3 5.39 0.36
 -3 17 2 1.29 0.12
 3 17 -2 1.46 0.12
 3 -17 -2 1.24 0.1
 3 -17 -2 1.46 0.12
 3 17 -1 7.99 0.45
 -3 17 1 6.74 0.45
 3 -17 -1 6.64 0.44
 3 -17 -1 7.02 0.44
 -3 17 0 4.09 0.27
 3 17 0 3.93 0.28
 3 -17 0 4.1 0.27
 3 -17 0 4.16 0.28
 3 17 1 16.51 0.99
 -3 17 -1 16.42 0.98
 3 -17 1 15.93 0.99
 3 -17 1 16.06 0.96
 -3 17 -2 0.09 0.05
 3 17 2 -0.01 0.01
 -3 -17 -2 0.01 0.02
 3 -17 2 -0.01 0.02
 3 -17 2 0.01 0.02
 3 17 3 14.36 0.88
 -3 -17 -3 15.19 0.84
 3 -17 3 13.86 0.86
 3 -17 3 13.43 0.88
 3 17 4 0.14 0.08
 3 -17 4 0.24 0.07
 3 -17 4 0.24 0.08
 -3 -17 -4 0.24 0.07
 3 17 5 1.8 0.17
 3 -17 5 1.81 0.17
 3 -17 5 2.09 0.18
 -3 -17 -5 1.61 0.15
 3 17 6 0.02 0.02
 3 -17 6 0.05 0.04
 -3 -17 -6 0.04 0.03
 3 -17 6 0 0.03
 3 17 7 -0.01 0.02
 3 -17 7 0.01 0.04
 -3 17 -8 0.06 0.06
 3 -17 8 -0.05 0.04
 3 18 -10 0.27 0.13
 3 -18 -10 0.34 0.13
 -3 18 9 0.34 0.09
 3 18 -9 0.27 0.12
 3 -18 -9 0.25 0.12
 -3 18 8 0 0.02
 3 18 -8 0.01 0.04
 3 -18 -8 0.03 0.04
 -3 18 7 -0.01 0.02
 3 18 -7 -0.01 0.03
 3 -18 -7 0.02 0.03
 -3 18 6 1.3 0.14
 3 -18 -6 1.6 0.15
 -3 18 5 10.42 0.66
 3 -18 -5 10.53 0.64
 -3 18 4 1.08 0.12
 3 -18 -4 1.19 0.12
 3 18 -3 15.05 0.91
 -3 18 3 14.79 0.92
 3 -18 -3 15.5 0.9
 -3 18 2 2.22 0.18
 3 -18 -2 2.36 0.16
 3 -18 -2 2.4 0.18
 3 18 -1 11.88 0.72
 -3 18 1 11.58 0.71
 3 -18 -1 11.39 0.71
 3 -18 -1 11.48 0.7
 -3 18 0 2.1 0.16
 3 -18 0 1.95 0.17
 3 -18 0 2.13 0.15
 -3 18 -1 6.54 0.41
 3 18 1 6.56 0.42
 3 -18 1 6.31 0.41
 3 -18 1 6.42 0.41
 -3 18 -2 0.59 0.08
 3 -18 2 0.75 0.1
 3 -18 2 0.7 0.08
 3 18 3 0.17 0.07
 3 -18 3 0.11 0.07
 3 -18 3 0.21 0.08
 3 18 4 3.65 0.27
 3 -18 4 3.88 0.27
 3 -18 4 3.83 0.27
 3 18 5 0.16 0.1
 3 -18 5 0.04 0.03
 3 -18 5 0.24 0.1
 3 18 6 1.2 0.15
 3 -18 6 1.42 0.16
 3 -18 6 1.18 0.15
 -3 18 -7 0.24 0.13
 3 18 7 0.21 0.1
 3 -18 7 0.07 0.05
 -3 18 -8 0.01 0.06
 3 -18 8 0.03 0.04
 3 19 -10 0.01 0.05
 3 -19 -10 0.19 0.12
 3 19 -9 0.26 0.12
 -3 19 9 0.31 0.1
 3 -19 -9 0.32 0.11
 3 19 -8 0.04 0.04
 -3 19 8 0.04 0.02
 3 -19 -8 0.17 0.09
 -3 19 7 0.44 0.1
 3 -19 -7 0.41 0.1
 -3 19 6 0.23 0.09
 3 -19 -6 0.2 0.09
 -3 19 5 2.03 0.17
 3 -19 -5 2.11 0.18
 3 19 -4 4.91 0.32
 -3 19 4 4.86 0.33
 3 -19 -4 4.85 0.33
 3 19 -3 0.74 0.09
 3 -19 -3 0.87 0.11
 3 19 -2 13.62 0.81
 -3 19 2 12.95 0.81
 3 -19 -2 12.95 0.79
 3 19 -1 29.3 1.56
 -3 19 1 25.07 1.56
 3 -19 -1 24.76 1.57
 3 -19 -1 24.92 1.52
 -3 19 0 6.03 0.38
 3 19 0 5.72 0.39
 3 -19 0 5.87 0.38
 3 -19 0 6.15 0.38
 3 19 1 4.84 0.3
 -3 19 -1 3.94 0.28
 3 -19 1 3.87 0.28
 3 -19 1 4.12 0.28
 -3 19 -2 3.77 0.24
 3 19 2 3.35 0.26
 3 -19 2 3.59 0.26
 3 -19 2 3.62 0.25
 3 19 3 1.36 0.13
 3 -19 3 1.1 0.13
 3 -19 3 1.15 0.12
 3 -19 4 0.15 0.07
 3 -19 4 0.24 0.09
 3 19 5 0.75 0.12
 3 -19 5 0.65 0.12
 3 -19 5 0.6 0.1
 3 19 6 -0.01 0.02
 3 -19 6 -0.02 0.03
 3 -19 6 0.02 0.04
 3 19 7 0.01 0.02
 -3 19 -7 0.01 0.05
 3 -19 7 0.01 0.04
 3 -20 -10 0 0.04
 -3 20 9 0 0.02
 3 -20 -9 0 0.04
 -3 20 8 0 0.02
 3 -20 -8 0.04 0.04
 -3 20 7 1.61 0.16
 3 -20 -7 1.62 0.16
 -3 20 6 0.57 0.1
 3 -20 -6 0.4 0.1
 -3 20 5 1.53 0.14
 3 -20 -5 1.23 0.14
 3 20 -4 0.29 0.07
 -3 20 4 0.14 0.08
 3 -20 -4 0.25 0.08
 3 20 -3 0.41 0.07
 -3 20 3 0.41 0.08
 3 -20 -3 0.35 0.08
 -3 20 2 0.38 0.08
 3 20 -2 0.3 0.07
 3 -20 -2 0.61 0.09
 -3 20 1 1.61 0.14
 3 20 -1 1.66 0.15
 3 -20 -1 1.62 0.15
 3 20 0 0.17 0.07
 -3 20 0 0.17 0.07
 3 -20 0 0.1 0.07
 3 20 1 0.09 0.07
 -3 20 -1 0.09 0.06
 3 -20 1 0.15 0.05
 3 -20 1 0.04 0.03
 -3 20 -2 3.07 0.22
 3 20 2 2.99 0.23
 3 -20 2 3.21 0.22
 3 -20 2 3.04 0.23
 3 20 3 0.46 0.1
 3 -20 3 0.63 0.09
 3 -20 3 0.7 0.11
 3 20 4 1.57 0.16
 3 -20 4 1.78 0.16
 3 -20 4 1.53 0.15
 3 20 5 0.01 0.02
 3 -20 5 0.22 0.1
 3 -20 5 0.03 0.03
 3 20 6 0.31 0.11
 3 -20 6 0.43 0.12
 3 -20 6 0.28 0.1
 3 20 7 -0.03 0.02
 -3 20 -7 0.01 0.05
 3 -20 7 0 0.04
 -3 21 9 0.05 0.03
 3 -21 -9 0.02 0.04
 3 -21 -8 0.15 0.1
 3 -21 -7 0.19 0.1
 -3 21 6 1.23 0.14
 3 -21 -6 1.25 0.15
 -3 21 5 0 0.02
 3 -21 -5 -0.01 0.03
 3 21 -4 0.08 0.06
 -3 21 4 0.12 0.08
 3 -21 -4 0.01 0.03
 -3 21 3 3.92 0.28
 3 21 -3 4.17 0.27
 3 -21 -3 3.73 0.27
 -3 21 2 2.99 0.22
 3 21 -2 2.91 0.22
 3 -21 -2 2.94 0.22
 3 21 -1 0.16 0.07
 -3 21 1 0.26 0.07
 3 -21 -1 0.35 0.08
 -3 21 0 0.86 0.1
 3 21 0 1.15 0.11
 3 -21 0 0.88 0.11
 3 21 1 2.54 0.19
 -3 21 -1 2.21 0.17
 3 -21 1 2.09 0.18
 -3 21 -2 0.42 0.07
 3 21 2 0.4 0.09
 3 -21 2 0.45 0.09
 3 -21 2 0.3 0.07
 3 21 3 0.11 0.09
 3 -21 3 0.09 0.06
 3 -21 3 0.01 0.03
 3 21 4 0.12 0.09
 3 -21 4 0 0.03
 3 -21 4 -0.01 0.03
 3 21 5 0.38 0.11
 3 -21 5 0.31 0.11
 3 -21 5 0.35 0.09
 3 21 6 0.37 0.12
 3 -21 6 0.39 0.13
 3 -21 6 0.38 0.1
 3 21 7 0.38 0.12
 -3 21 -7 0.36 0.14
 3 -21 7 0.43 0.13
 -3 22 9 -0.01 0.02
 3 -22 -9 0.03 0.04
 -3 22 8 0.06 0.03
 3 -22 -8 0.16 0.11
 3 -22 -7 0.21 0.11
 -3 22 6 0.82 0.13
 3 -22 -6 1.14 0.14
 -3 22 5 0.05 0.02
 3 -22 -5 0.04 0.03
 -3 22 4 0.27 0.09
 3 22 -4 0.13 0.06
 3 -22 -4 0.4 0.09
 3 22 -3 1.32 0.13
 -3 22 3 1.26 0.14
 3 -22 -3 1.23 0.13
 -3 22 2 2.88 0.21
 3 22 -2 2.67 0.21
 3 -22 -2 2.78 0.21
 -3 22 1 0.16 0.07
 3 22 -1 0.22 0.08
 3 -22 -1 0.17 0.07
 -3 22 0 3.24 0.23
 3 22 0 3.12 0.24
 3 -22 0 3.3 0.24
 -3 22 -1 0.02 0.02
 3 22 1 0.01 0.02
 3 -22 1 -0.01 0.03
 3 22 2 0.54 0.1
 3 22 3 1.39 0.16
 3 -22 3 1.76 0.16
 3 22 4 0.62 0.12
 3 -22 4 0.8 0.11
 3 -22 4 0.8 0.12
 3 22 5 0.56 0.12
 3 -22 5 0.38 0.1
 3 -22 5 0.53 0.11
 3 22 6 0.03 0.03
 3 -22 6 0.01 0.04
 3 22 7 0.02 0.03
 3 -22 7 0.02 0.05
 -3 23 9 0 0.02
 3 -23 -9 0.01 0.04
 -3 23 8 0.02 0.02
 3 -23 -8 0.09 0.05
 -3 23 7 0.07 0.03
 3 -23 -7 0.16 0.11
 3 -23 -6 0.16 0.09
 -3 23 5 0.02 0.02
 3 -23 -5 0.03 0.03
 -3 23 4 2.68 0.22
 3 -23 -4 2.74 0.21
 3 23 -3 0.38 0.08
 -3 23 3 0.49 0.1
 3 -23 -3 0.53 0.09
 3 23 -2 0.15 0.08
 -3 23 2 0.02 0.02
 3 -23 -2 0.05 0.03
 3 23 -1 1.22 0.13
 -3 23 1 1.33 0.13
 3 -23 -1 1.11 0.13
 -3 23 0 0.15 0.07
 3 -23 0 0.11 0.08
 -3 23 -1 1.42 0.13
 3 23 1 1.32 0.14
 3 -23 1 1.55 0.15
 3 23 2 0.17 0.09
 3 -23 2 0.25 0.09
 3 23 3 1.45 0.15
 3 -23 3 1.21 0.15
 3 23 4 0.14 0.1
 3 -23 4 0 0.04
 3 -23 5 0.18 0.11
 3 23 6 0.01 0.03
 3 -23 6 0.01 0.04
 -3 24 8 0.73 0.13
 3 -24 -8 0.38 0.12
 -3 24 7 0.15 0.1
 3 -24 -7 0.32 0.11
 -3 24 6 0.18 0.11
 3 -24 -6 0.17 0.1
 -3 24 5 0.2 0.09
 -3 24 4 1.57 0.16
 3 -24 -4 1.73 0.16
 3 24 -3 0.03 0.02
 -3 24 3 0.03 0.02
 3 -24 -3 0.05 0.03
 3 24 -2 0.59 0.1
 -3 24 2 0.58 0.1
 3 -24 -2 0.45 0.09
 -3 24 1 0.41 0.09
 3 24 -1 0.4 0.09
 3 -24 -1 0.42 0.09
 -3 24 0 0.02 0.02
 3 24 0 0.02 0.02
 3 -24 0 0 0.03
 3 24 1 0.28 0.1
 -3 24 -1 0.27 0.08
 3 -24 1 0.18 0.09
 3 24 2 0.17 0.09
 3 -24 2 0.23 0.1
 3 24 3 0.8 0.13
 3 -24 3 0.65 0.12
 3 24 4 0.24 0.11
 3 -24 4 0.07 0.04
 3 24 5 0.01 0.03
 3 -24 5 0.05 0.04
 3 24 6 0.26 0.13
 3 -24 6 0.33 0.13
 -3 25 8 0.01 0.03
 3 -25 -8 0.02 0.04
 -3 25 7 0.22 0.11
 3 -25 -7 0.09 0.04
 -3 25 6 0.22 0.11
 3 -25 -6 0.04 0.04
 -3 25 5 0.16 0.1
 3 -25 -5 0.02 0.04
 -3 25 4 0.87 0.13
 3 -25 -4 0.86 0.12
 3 25 -3 0.77 0.1
 -3 25 3 0.71 0.11
 3 -25 -3 0.65 0.11
 3 25 -2 1.48 0.14
 -3 25 2 1.25 0.14
 3 -25 -2 1.35 0.15
 3 25 -1 0.62 0.11
 -3 25 1 0.36 0.1
 3 -25 -1 0.46 0.1
 -3 25 0 0 0.02
 3 25 0 0.01 0.02
 3 -25 0 -0.03 0.03
 3 25 1 0.73 0.12
 -3 25 -1 0.71 0.1
 3 -25 1 0.61 0.11
 3 25 2 0.01 0.02
 3 -25 2 0.02 0.03
 3 25 3 0.03 0.03
 3 -25 3 0.03 0.04
 3 25 4 0 0.02
 3 -25 4 0.06 0.04
 3 25 5 1.16 0.16
 3 -25 5 1.12 0.16
 3 25 6 0.02 0.03
 3 -25 6 0.01 0.05
 3 -26 -8 0.14 0.1
 -3 26 7 0.88 0.14
 3 -26 -7 0.82 0.14
 -3 26 6 0.43 0.13
 3 -26 -6 0.5 0.12
 -3 26 5 0.82 0.14
 3 -26 -5 0.85 0.13
 -3 26 4 0.28 0.11
 3 -26 -4 0.41 0.11
 3 26 -3 0.79 0.11
 -3 26 3 0.62 0.12
 3 -26 -3 0.61 0.11
 3 26 -2 0.78 0.11
 -3 26 2 0.61 0.12
 3 -26 -2 0.66 0.11
 3 26 -1 -0.01 0.02
 -3 26 1 -0.04 0.02
 3 -26 -1 0.02 0.03
 -3 26 0 0.75 0.11
 3 26 0 0.81 0.12
 3 -26 0 0.78 0.12
 -3 26 -1 0.01 0.02
 3 26 1 0.01 0.02
 3 -26 1 0 0.03
 3 26 2 2.85 0.24
 3 -26 2 2.74 0.23
 3 26 3 -0.01 0.02
 3 -26 3 0.06 0.04
 3 -26 4 0.27 0.11
 3 26 5 -0.01 0.03
 3 -26 5 0.04 0.04
 -3 27 7 0 0.03
 3 -27 -7 0.04 0.04
 -3 27 6 1.42 0.17
 3 -27 -6 1.43 0.16
 -3 27 5 0.27 0.12
 3 -27 -5 0.22 0.1
 -3 27 4 2.56 0.22
 3 -27 -4 2.07 0.2
 3 27 -3 1.39 0.14
 -3 27 3 1.36 0.16
 3 -27 -3 1.06 0.15
 3 27 -2 1.34 0.15
 -3 27 2 1.3 0.16
 3 -27 -2 1.32 0.15
 -3 27 1 0.18 0.1
 3 -27 -1 0.19 0.1
 -3 27 0 1.33 0.15
 3 27 0 1.64 0.17
 3 -27 0 1.59 0.16
 3 27 1 -0.01 0.02
 -3 27 -1 0.14 0.09
 3 -27 1 0.06 0.04
 3 -27 2 0.21 0.11
 3 27 3 -0.01 0.03
 3 -27 3 0.02 0.04
 3 27 4 0.17 0.12
 3 -27 4 0.04 0.04
 3 27 5 0.3 0.13
 3 -27 5 0.4 0.12
 -3 28 7 0.01 0.03
 3 -28 -7 -0.02 0.04
 -3 28 6 0.18 0.11
 3 -28 -6 0.01 0.04
 -3 28 5 0.22 0.11
 3 -28 -5 0.03 0.04
 -3 28 4 0.24 0.12
 3 -28 -4 0.27 0.11
 3 28 -3 0.52 0.12
 -3 28 3 0.64 0.13
 3 -28 -3 0.68 0.12
 -3 28 2 2.23 0.2
 3 28 -2 2.19 0.2
 3 -28 -2 1.99 0.2
 3 28 -1 0.52 0.12
 -3 28 1 0.5 0.12
 3 -28 -1 0.32 0.11
 3 28 0 2.84 0.23
 -3 28 0 2.33 0.21
 3 -28 0 2.26 0.21
 3 28 1 0.29 0.11
 3 -28 1 0.15 0.1
 3 28 2 0.05 0.03
 3 -28 2 0.09 0.04
 3 28 3 0.03 0.03
 3 -28 3 0.05 0.04
 3 28 4 0.82 0.15
 3 -28 4 0.89 0.14
 -3 29 6 0.53 0.14
 3 -29 -6 0.63 0.13
 -3 29 5 0.33 0.13
 -3 29 4 1.17 0.15
 3 -29 -4 0.87 0.14
 -3 29 3 0.22 0.12
 3 -29 -3 0.05 0.04
 3 29 -2 0.17 0.11
 -3 29 2 0.46 0.13
 3 -29 -2 0.24 0.11
 -3 29 1 0.41 0.12
 3 29 -1 0.38 0.12
 3 -29 -1 0.59 0.12
 -3 29 0 0.22 0.1
 3 29 0 0.21 0.12
 3 -29 0 0.08 0.04
 3 29 1 0.17 0.11
 3 -29 1 0.37 0.11
 3 29 2 0.4 0.12
 3 -29 2 0.22 0.11
 3 29 3 0 0.03
 3 -29 3 0.03 0.04
 3 -29 4 0.26 0.11
 -3 30 5 0.21 0.13
 3 -30 -5 0.27 0.11
 -3 30 4 1.08 0.16
 3 -30 -4 0.88 0.14
 -3 30 3 0.22 0.12
 3 -30 -3 0.3 0.12
 3 30 -2 -0.02 0.02
 -3 30 2 0.01 0.03
 3 -30 -2 0.02 0.04
 -3 30 1 0.22 0.1
 3 -30 -1 0.13 0.1
 -3 30 0 0.01 0.02
 3 30 0 0 0.03
 3 -30 0 0 0.04
 3 30 1 -0.01 0.03
 3 -30 1 0.06 0.04
 3 30 2 0.05 0.03
 3 -30 2 0.18 0.11
 3 30 3 0.02 0.03
 3 -30 3 0.07 0.04
 -3 31 5 0.01 0.03
 3 -31 -5 0.02 0.04
 3 -31 -4 0.17 0.11
 -3 31 3 -0.04 0.02
 3 -31 -3 0.04 0.04
 -3 31 2 0.27 0.12
 3 31 -2 0.19 0.12
 3 -31 -2 0.27 0.11
 -3 31 1 0 0.02
 3 31 -1 0.02 0.03
 3 -31 -1 0.01 0.03
 -3 31 0 0.02 0.02
 3 31 0 0.01 0.03
 3 -31 0 0.04 0.04
 3 31 1 0 0.03
 3 -31 1 -0.01 0.03
 3 31 2 0.2 0.13
 3 -31 2 0.27 0.11
 -3 32 4 0.01 0.03
 3 -32 -4 0 0.04
 -3 32 3 0.01 0.03
 3 -32 -3 -0.01 0.04
 3 32 -2 0.09 0.03
 -3 32 2 0.27 0.12
 3 -32 -2 0.18 0.11
 3 32 -1 0.04 0.03
 -3 32 1 0.04 0.03
 3 -32 -1 0.05 0.04
 -3 32 0 0.01 0.03
 3 32 0 -0.04 0.02
 3 -32 0 0.03 0.04
 3 32 1 0 0.03
 3 -32 1 0.01 0.04
 -3 33 2 -0.01 0.03
 3 -33 -2 0.05 0.04
 3 -33 -1 0.2 0.11
 3 33 0 -0.04 0.03
 3 -33 0 0.03 0.04
 4 0 -12 -0.06 0.06
 4 0 -12 -0.05 0.05
 4 0 -11 0.02 0.05
 4 0 -11 -0.04 0.04
 4 0 -10 0.04 0.05
 4 0 -10 0.05 0.04
 -4 0 10 0.01 0.03
 4 0 -9 0.17 0.1
 -4 0 8 14.13 0.84
 4 0 -8 13.89 0.88
 4 0 -8 14.03 0.84
 4 0 -6 5.65 0.37
 -4 0 6 5.69 0.35
 4 0 -6 5.49 0.35
 4 0 -5 0.12 0.05
 4 0 -5 0.11 0.04
 4 0 -4 26.58 1.65
 -4 0 4 27.35 1.61
 4 0 -4 27.59 1.56
 4 0 -3 0.11 0.04
 4 0 -2 119.45 7.01
 4 0 -2 117.07 6.68
 -4 0 2 115.1 6.88
 4 0 -1 0.03 0.04
 4 0 0 0.69 0.06
 4 0 0 0.45 0.05
 -4 0 0 0.45 0.05
 -4 0 -1 -0.02 0.01
 4 0 1 0.07 0.04
 4 0 1 0 0.01
 -4 0 -2 26.52 1.54
 4 0 2 25.2 1.57
 4 0 2 25.98 1.5
 4 0 3 0.01 0.02
 4 0 3 0.01 0.02
 -4 0 -3 0 0.01
 4 0 4 7.51 0.48
 4 0 4 7.55 0.46
 -4 0 -4 7.34 0.46
 4 0 5 0 0.02
 4 0 5 0.11 0.08
 4 0 6 2.16 0.19
 4 0 6 2.38 0.19
 4 0 7 -0.01 0.03
 4 0 7 -0.01 0.03
 4 0 8 0.83 0.14
 4 0 9 -0.02 0.04
 -4 0 -9 -0.05 0.06
 4 1 -12 0.75 0.17
 4 1 -12 0.94 0.18
 4 -1 -12 0.96 0.18
 4 -1 -12 0.84 0.16
 4 1 -11 0.09 0.06
 4 1 -11 0.07 0.05
 4 -1 -11 0.07 0.06
 -4 -1 11 0.17 0.1
 4 -1 -11 0.2 0.12
 4 1 -10 0 0.04
 4 1 -10 0.01 0.04
 4 -1 -10 0.04 0.05
 -4 -1 10 0 0.03
 4 -1 -10 0.15 0.1
 4 1 -9 0.95 0.12
 4 1 -9 0.85 0.13
 -4 -1 9 0.79 0.11
 4 -1 -9 1.45 0.15
 4 1 -8 0.7 0.11
 4 1 -8 0.64 0.1
 4 -1 -8 0.53 0.1
 -4 -1 8 0.56 0.09
 4 -1 -8 0.64 0.11
 -4 1 7 21.41 1.18
 4 1 -7 18.16 1.15
 4 1 -7 17.9 1.21
 4 -1 -7 22.57 1.22
 -4 -1 7 17.99 1.15
 4 -1 -7 21.72 1.16
 -4 -1 7 18.52 1.17
 4 1 -6 16.81 1.03
 -4 1 6 16.41 0.99
 4 1 -6 16.98 0.98
 4 -1 -6 16.58 0.98
 -4 -1 6 16.69 0.99
 4 -1 -6 16.3 1.03
 -4 1 5 10.91 0.56
 4 1 -5 8.42 0.55
 4 1 -5 8 0.58
 -4 -1 5 8.23 0.56
 4 -1 -5 10.91 0.59
 -4 1 4 8.66 0.53
 4 1 -4 8.7 0.51
 4 1 -4 8.48 0.54
 4 -1 -4 8.75 0.51
 -4 -1 4 8.73 0.52
 4 -1 -4 8.51 0.54
 -4 1 3 61.28 3.54
 4 1 -3 57.17 3.61
 4 1 -3 57.78 3.44
 -4 -1 3 56.38 3.54
 4 -1 -3 64.68 3.44
 4 -1 -3 64 3.61
 -4 1 2 32.54 1.87
 4 1 -2 30.5 1.9
 4 1 -2 31.46 1.81
 -4 -1 2 31.94 1.87
 4 -1 -2 31.82 1.91
 4 -1 -2 31.41 1.81
 4 1 -1 3.03 0.19
 4 1 -1 3.64 0.22
 4 -1 -1 3.36 0.22
 4 -1 -1 3.04 0.2
 -4 1 0 13.3 0.82
 4 1 0 13.68 0.84
 4 1 0 13.79 0.79
 4 -1 0 13.46 0.79
 -4 -1 0 13.76 0.82
 4 -1 0 14 0.84
 -4 1 -1 47.33 2.65
 4 1 1 42.52 2.57
 4 1 1 38.71 2.7
 4 -1 1 50.47 2.57
 4 -1 1 48.66 2.7
 -4 -1 -1 41.58 2.65
 4 1 2 12.47 0.77
 -4 1 -2 12.42 0.75
 4 1 2 12.41 0.73
 4 -1 2 12.61 0.73
 4 -1 2 12.22 0.77
 -4 -1 -2 12.52 0.75
 -4 1 -3 0.99 0.09
 4 1 3 1.16 0.1
 4 1 3 1.44 0.1
 -4 -1 -3 1.16 0.09
 4 -1 3 1.07 0.1
 4 -1 3 1.1 0.1
 -4 1 -4 1.6 0.13
 4 1 4 1.64 0.14
 4 1 4 1.72 0.14
 4 -1 4 1.62 0.14
 -4 -1 -4 1.76 0.13
 4 -1 4 1.91 0.14
 4 1 5 3.54 0.24
 4 1 5 3.26 0.25
 4 -1 5 3.14 0.25
 4 -1 5 3.52 0.24
 -4 -1 -5 3.48 0.23
 4 1 6 0.19 0.08
 4 1 6 0.23 0.08
 4 -1 6 0.12 0.08
 4 -1 6 0.23 0.09
 4 1 7 0.6 0.11
 4 1 7 0.69 0.12
 4 -1 7 0.57 0.11
 4 -1 7 0.39 0.11
 4 1 8 0.01 0.04
 4 -1 8 0.04 0.04
 4 -1 8 0.01 0.04
 -4 1 -9 0.08 0.06
 4 1 9 -0.01 0.04
 4 -1 9 0 0.04
 -4 -1 -9 0.25 0.13
 4 2 -12 0.7 0.16
 4 2 -12 0.67 0.17
 4 -2 -12 0.45 0.16
 4 -2 -12 0.58 0.17
 -4 -2 12 0.71 0.14
 4 2 -11 0.06 0.05
 4 2 -11 0.35 0.13
 4 -2 -11 0.21 0.12
 -4 -2 11 0.14 0.11
 4 -2 -11 0.1 0.07
 4 2 -10 0.48 0.11
 4 2 -10 0.37 0.12
 -4 -2 10 0.27 0.09
 4 -2 -10 0.21 0.1
 4 -2 -10 0.23 0.12
 4 2 -9 3.62 0.26
 4 2 -9 3.47 0.28
 4 -2 -9 3.87 0.29
 -4 -2 9 3.71 0.26
 4 -2 -9 3.37 0.26
 4 2 -8 4.28 0.29
 4 2 -8 4.1 0.31
 4 -2 -8 4.26 0.31
 4 -2 -8 4.22 0.29
 -4 -2 8 4.33 0.28
 -4 2 7 4.82 0.3
 4 2 -7 4.72 0.33
 4 2 -7 4.64 0.31
 4 -2 -7 4.63 0.31
 4 -2 -7 4.79 0.33
 -4 -2 7 4.94 0.3
 -4 -2 7 5 0.31
 -4 2 6 3.68 0.22
 4 2 -6 3.11 0.24
 4 2 -6 2.97 0.22
 -4 -2 6 2.98 0.21
 -4 -2 6 3.05 0.21
 4 -2 -6 3.72 0.23
 4 -2 -6 3.79 0.24
 4 2 -5 0.07 0.05
 -4 2 5 0.16 0.04
 4 2 -5 0.06 0.04
 4 -2 -5 0.09 0.04
 4 -2 -5 0.12 0.05
 4 2 -4 0.84 0.08
 -4 2 4 0.54 0.06
 4 2 -4 0.62 0.06
 4 -2 -4 0.75 0.07
 4 -2 -4 0.8 0.08
 -4 -2 4 0.49 0.06
 -4 2 3 13.84 0.86
 4 2 -3 14.11 0.88
 4 2 -3 14.69 0.83
 -4 -2 3 14.35 0.86
 4 -2 -3 14.51 0.83
 4 -2 -3 14.54 0.88
 -4 2 2 21 1.2
 4 2 -2 19.65 1.23
 4 2 -2 19.33 1.16
 4 -2 -2 20.94 1.23
 4 -2 -2 21.42 1.17
 -4 -2 2 19.11 1.2
 4 2 -1 4.59 0.29
 -4 2 1 4.45 0.28
 4 2 -1 4.56 0.27
 -4 -2 1 4.43 0.28
 4 -2 -1 4.53 0.27
 4 2 0 4.55 0.27
 4 2 0 4.52 0.29
 -4 2 0 4.49 0.28
 4 -2 0 4.43 0.27
 4 -2 0 4.6 0.29
 -4 -2 0 4.43 0.28
 4 2 1 6.08 0.34
 -4 2 -1 5.59 0.36
 4 2 1 5.68 0.37
 -4 -2 -1 5.6 0.36
 4 -2 1 5.82 0.35
 4 2 3 1.97 0.15
 4 2 3 2.11 0.15
 -4 2 -3 1.92 0.14
 4 -2 3 2 0.15
 -4 -2 -3 2.07 0.14
 4 -2 3 1.94 0.15
 -4 2 -4 1.6 0.12
 4 2 4 1.76 0.13
 4 2 4 1.52 0.14
 4 -2 4 1.49 0.14
 -4 -2 -4 1.63 0.12
 4 -2 4 1.59 0.13
 4 2 5 3.59 0.27
 4 2 5 3.95 0.26
 4 -2 5 3.68 0.27
 -4 -2 -5 3.88 0.25
 4 -2 5 3.78 0.26
 4 2 6 0.99 0.12
 4 2 6 0.7 0.12
 4 -2 6 0.89 0.12
 4 -2 6 1.02 0.11
 4 2 7 0.34 0.1
 4 2 7 0.47 0.11
 4 -2 7 0.33 0.11
 4 -2 7 0.44 0.11
 4 2 8 0.25 0.11
 4 -2 8 0.24 0.1
 -4 -2 -8 0.24 0.12
 4 -2 8 0.34 0.11
 -4 2 -9 0.29 0.14
 4 2 9 0.1 0.05
 -4 -2 -9 0.25 0.14
 4 -2 9 0.43 0.11
 4 3 -12 4.39 0.37
 4 3 -12 4.77 0.39
 4 -3 -12 5.5 0.41
 -4 -3 12 5.16 0.36
 4 -3 -12 5.03 0.38
 4 3 -11 0 0.04
 4 3 -11 0.19 0.13
 4 -3 -11 0.16 0.12
 4 -3 -11 0.12 0.06
 -4 -3 11 0.14 0.1
 4 3 -10 0.77 0.14
 4 3 -10 0.75 0.12
 -4 -3 10 0.86 0.12
 4 -3 -10 0.8 0.15
 4 -3 -10 0.63 0.12
 4 3 -9 0.9 0.13
 4 -3 -9 1.18 0.13
 -4 -3 9 0.81 0.11
 4 -3 -9 1.21 0.14
 4 3 -8 1.31 0.14
 -4 -3 8 1.34 0.12
 4 -3 -8 1.18 0.13
 4 -3 -8 1.47 0.14
 4 3 -7 0.48 0.09
 -4 3 7 0.57 0.07
 -4 -3 7 0.5 0.07
 4 -3 -7 0.63 0.09
 4 -3 -7 0.63 0.09
 4 3 -6 0.73 0.07
 4 3 -6 0.56 0.08
 -4 3 6 0.63 0.07
 4 -3 -6 0.63 0.08
 -4 -3 6 0.52 0.06
 4 -3 -6 0.59 0.08
 -4 -3 6 0.66 0.07
 4 3 -5 2.36 0.18
 4 3 -5 2.56 0.17
 -4 -3 5 2.62 0.17
 -4 3 4 89.09 5.27
 4 3 -4 91.86 5.12
 4 3 -4 88.08 5.37
 -4 -3 4 90.72 5.27
 4 -3 -4 89.11 5.37
 4 -3 -4 89.28 5.12
 4 3 -3 17.25 1.06
 4 3 -3 17.9 1
 -4 -3 3 17.25 1.04
 4 3 -2 30.14 1.81
 4 3 -2 29.82 1.72
 -4 3 2 30.19 1.78
 -4 -3 2 29.69 1.78
 4 -3 -2 30.26 1.73
 4 -3 -2 30.54 1.82
 4 3 -1 2.01 0.13
 4 3 -1 2.19 0.15
 4 -3 -1 2.56 0.15
 4 3 0 22.55 1.23
 -4 3 0 21.3 1.27
 4 3 0 20.75 1.3
 -4 -3 0 21.41 1.28
 4 -3 0 21.23 1.24
 4 -3 0 21.36 1.3
 4 3 1 2.26 0.17
 4 3 1 2.25 0.17
 -4 3 -1 2.84 0.17
 4 3 1 2.25 0.16
 -4 -3 -1 2.34 0.17
 4 -3 1 3.11 0.18
 4 3 2 1.91 0.14
 4 3 2 1.88 0.13
 4 3 2 1.9 0.14
 -4 3 -2 1.87 0.13
 -4 -3 -2 2.06 0.14
 4 -3 2 1.84 0.14
 4 -3 2 1.91 0.15
 4 3 3 2.99 0.22
 -4 3 -3 4.04 0.22
 4 3 3 2.82 0.23
 4 3 3 3.02 0.22
 4 -3 3 3.75 0.24
 -4 -3 -3 3.18 0.22
 4 -3 3 4.14 0.23
 4 3 4 5.69 0.35
 4 3 4 5.38 0.36
 4 3 4 5.67 0.35
 -4 3 -4 5.42 0.34
 4 -3 4 5.3 0.35
 -4 -3 -4 5.63 0.35
 4 -3 4 5.3 0.37
 4 3 5 2.2 0.17
 4 3 5 2.41 0.17
 4 -3 5 1.86 0.16
 4 -3 5 1.65 0.17
 -4 -3 -5 2.06 0.15
 4 3 6 4.96 0.34
 4 3 6 4.91 0.33
 4 -3 6 4.99 0.33
 4 -3 6 4.67 0.34
 4 3 7 0.23 0.1
 4 3 7 0.33 0.1
 4 -3 7 0.38 0.1
 4 -3 7 0.39 0.1
 4 3 8 0.64 0.12
 -4 -3 -8 0.56 0.13
 4 -3 8 0.54 0.13
 4 -3 8 0.62 0.12
 4 3 9 0.05 0.04
 -4 3 -9 0.2 0.15
 4 -3 9 0.04 0.04
 -4 -3 -9 0.03 0.06
 4 4 -12 0.45 0.16
 4 4 -12 0.57 0.15
 4 -4 -12 0.67 0.17
 -4 -4 12 0.41 0.13
 4 -4 -12 1.01 0.18
 4 4 -11 0.01 0.06
 4 4 -11 0 0.04
 4 -4 -11 0.08 0.06
 4 -4 -11 0.03 0.04
 -4 -4 11 -0.01 0.03
 4 4 -10 0.42 0.13
 -4 -4 10 0.44 0.1
 4 -4 -10 0.4 0.13
 4 -4 -10 0.42 0.11
 4 4 -9 0.23 0.1
 4 -4 -9 0.24 0.11
 -4 -4 9 0.28 0.08
 4 -4 -9 0.26 0.1
 4 4 -8 3.48 0.29
 -4 4 8 4.49 0.27
 4 -4 -8 4.64 0.3
 -4 -4 8 3.68 0.27
 4 -4 -8 4.34 0.29
 4 4 -7 0.53 0.09
 -4 4 7 0.5 0.06
 4 -4 -7 0.58 0.09
 4 -4 -7 0.43 0.08
 -4 -4 7 0.56 0.07
 4 4 -6 0.14 0.07
 -4 4 6 0.33 0.05
 4 -4 -6 0.38 0.07
 4 -4 -6 0.41 0.07
 4 4 -5 3.78 0.24
 4 4 -5 3.83 0.26
 -4 4 5 3.99 0.25
 -4 -4 5 4.07 0.25
 -4 -4 5 3.88 0.24
 4 -4 -5 3.8 0.25
 4 -4 -5 3.94 0.27
 4 4 -4 11.81 0.83
 -4 4 4 15.69 0.81
 4 4 -4 12.29 0.78
 -4 -4 4 11.62 0.8
 4 -4 -4 16.25 0.79
 -4 4 3 9.33 0.58
 4 4 -3 9.74 0.55
 4 4 -3 9.45 0.59
 4 -4 -3 9.53 0.59
 4 -4 -3 9.62 0.56
 -4 -4 3 9.17 0.57
 4 4 -2 1.68 0.11
 4 4 -2 1.59 0.09
 -4 4 2 1.27 0.11
 4 -4 -2 1.38 0.1
 4 -4 -2 1.28 0.11
 -4 -4 2 1.4 0.11
 4 4 -1 5.69 0.36
 4 4 -1 5.71 0.33
 -4 4 1 5.55 0.35
 -4 -4 1 5.57 0.35
 4 -4 -1 5.59 0.34
 4 -4 -1 5.65 0.36
 4 4 0 1.04 0.09
 4 4 0 1.13 0.09
 -4 4 0 1.17 0.09
 4 4 0 1.09 0.08
 4 -4 0 1.3 0.09
 -4 -4 0 1.02 0.09
 4 4 1 0.02 0.01
 -4 4 -1 0.01 0.01
 4 4 1 0.01 0.02
 4 4 1 0.08 0.04
 -4 -4 -1 0.12 0.04
 4 -4 1 0.01 0.02
 4 -4 1 0 0.01
 4 4 2 0.09 0.04
 4 4 2 0.05 0.04
 4 -4 2 0.4 0.05
 4 4 3 1.32 0.11
 4 4 3 1.3 0.11
 -4 4 -3 1.27 0.1
 4 4 3 1.37 0.11
 4 -4 3 1.31 0.11
 4 -4 3 1.31 0.12
 4 4 4 0.14 0.06
 4 4 4 0.11 0.06
 4 4 4 0.17 0.06
 4 -4 4 0.48 0.08
 4 4 5 7.36 0.46
 4 4 5 7.34 0.46
 4 4 5 7.27 0.48
 4 -4 5 7.19 0.48
 4 -4 5 7.26 0.46
 -4 -4 -5 7.46 0.46
 4 4 6 0.71 0.11
 4 4 6 0.86 0.11
 4 -4 6 0.63 0.1
 4 -4 6 0.65 0.11
 4 4 7 0.05 0.04
 4 4 7 0.01 0.03
 4 -4 7 0.05 0.04
 4 -4 7 0.17 0.1
 4 4 8 0.48 0.12
 4 -4 8 0.26 0.11
 4 -4 8 0.35 0.12
 -4 -4 -8 0.26 0.13
 -4 4 -9 0.19 0.14
 4 4 9 0.26 0.11
 4 -4 9 0.45 0.13
 -4 -4 -9 0.49 0.15
 4 5 -12 0.36 0.14
 4 5 -12 -0.04 0.06
 4 -5 -12 0 0.06
 -4 -5 12 0.02 0.04
 4 -5 -12 0.11 0.08
 4 5 -11 0.48 0.15
 4 -5 -11 0.12 0.05
 -4 -5 11 0.23 0.11
 4 -5 -11 0.06 0.06
 4 5 -10 0.07 0.05
 4 -5 -10 0.22 0.12
 -4 -5 10 0.19 0.09
 4 -5 -10 -0.02 0.04
 4 5 -9 0.57 0.11
 -4 -5 9 0.51 0.09
 4 -5 -9 0.54 0.12
 4 -5 -9 0.47 0.11
 4 5 -8 2.43 0.21
 -4 5 8 2.65 0.18
 -4 -5 8 2.7 0.19
 4 -5 -8 2.46 0.2
 4 -5 -8 2.61 0.21
 -4 5 7 3.9 0.26
 4 5 -7 3.92 0.28
 4 -5 -7 3.77 0.28
 -4 -5 7 4.17 0.26
 4 -5 -7 3.78 0.26
 -4 5 6 17.17 1.04
 4 5 -6 17.3 1.07
 -4 -5 6 17.91 1.03
 4 -5 -6 17.34 1.07
 4 -5 -6 16.57 1.02
 -4 -5 6 17.72 1.01
 4 5 -5 4.53 0.33
 -4 5 5 6.16 0.32
 4 5 -5 4.8 0.3
 -4 -5 5 4.61 0.3
 -4 -5 5 4.8 0.31
 4 5 -4 7.53 0.44
 4 5 -4 7.21 0.47
 -4 5 4 7.68 0.46
 4 -5 -4 7.43 0.45
 -4 -5 4 7.33 0.45
 4 -5 -4 7.58 0.47
 4 5 -3 10.01 0.57
 4 5 -3 9.68 0.61
 -4 -5 3 9.73 0.59
 4 5 -2 28.29 1.65
 -4 5 2 29.74 1.71
 4 5 -2 29.34 1.74
 -4 -5 2 28.82 1.71
 4 -5 -2 28.87 1.66
 4 -5 -2 28.43 1.75
 -4 5 1 178.61 10.65
 4 5 -1 180.09 10.32
 4 5 -1 183.16 10.64
 4 5 -1 179.89 10.82
 4 -5 -1 182.12 10.83
 -4 -5 1 182.03 10.64
 4 -5 -1 182.69 10.33
 4 5 0 6.69 0.42
 4 5 0 6.66 0.42
 -4 5 0 6.59 0.41
 4 5 0 6.63 0.39
 4 -5 0 6.91 0.42
 -4 -5 0 6.59 0.41
 4 -5 0 6.59 0.4
 -4 5 -1 1.3 0.1
 4 -5 1 1.38 0.11
 4 -5 1 1.11 0.1
 -4 5 -2 0.65 0.06
 4 5 2 0.73 0.07
 4 5 2 0.66 0.07
 4 5 2 0.63 0.06
 4 -5 2 0.63 0.07
 4 -5 2 0.6 0.08
 -4 5 -3 0.23 0.05
 4 5 3 0.44 0.06
 4 -5 3 0.16 0.06
 4 -5 3 0.26 0.06
 4 5 4 2.83 0.2
 -4 5 -4 2.82 0.18
 4 5 4 2.75 0.2
 4 5 4 2.8 0.19
 4 -5 4 2.63 0.2
 4 -5 4 2.55 0.21
 4 5 5 0.39 0.07
 4 5 5 0.4 0.08
 4 5 5 0.39 0.08
 4 -5 5 0.35 0.08
 4 -5 5 0.44 0.09
 4 5 6 0.51 0.09
 4 5 6 0.37 0.09
 4 -5 6 0.43 0.1
 4 -5 6 0.63 0.1
 4 5 7 0.13 0.09
 4 5 7 0.38 0.1
 4 -5 7 0.3 0.1
 4 -5 7 0.16 0.1
 4 5 8 0.14 0.1
 -4 -5 -8 0.31 0.12
 4 -5 8 0.26 0.11
 4 -5 8 0.29 0.11
 -4 5 -9 0.2 0.14
 4 -5 9 0 0.04
 -4 -5 -9 -0.05 0.05
 4 6 -12 0.23 0.12
 4 6 -12 -0.01 0.06
 4 -6 -12 0.3 0.17
 4 -6 -12 0.03 0.06
 4 6 -11 0.44 0.14
 4 -6 -11 0.23 0.13
 4 -6 -11 0.33 0.14
 -4 -6 11 0.22 0.1
 4 6 -10 0.67 0.14
 -4 -6 10 0.55 0.1
 4 -6 -10 0.76 0.14
 4 -6 -10 0.59 0.13
 4 6 -9 0.12 0.1
 4 -6 -9 0.27 0.1
 4 -6 -9 0.18 0.1
 -4 -6 9 0.26 0.07
 -4 6 8 0.71 0.08
 4 6 -8 0.42 0.1
 -4 -6 8 0.38 0.08
 4 -6 -8 0.78 0.1
 4 -6 -8 1.05 0.12
 4 6 -7 0.02 0.03
 -4 6 7 -0.01 0.01
 4 -6 -7 0.11 0.07
 4 -6 -7 0 0.02
 -4 -6 7 0.01 0.02
 -4 6 6 11.08 0.61
 4 6 -6 8.82 0.63
 -4 -6 6 9.41 0.6
 -4 -6 6 9.35 0.59
 4 -6 -6 11.05 0.63
 4 -6 -6 10.33 0.6
 -4 6 5 3.95 0.26
 4 6 -5 3.85 0.27
 4 -6 -5 4.05 0.26
 4 -6 -5 4.01 0.27
 -4 -6 5 4.28 0.25
 -4 -6 5 4.18 0.26
 4 6 -4 8.62 0.59
 4 6 -4 8.55 0.55
 -4 6 4 10.55 0.58
 4 -6 -4 11.04 0.57
 -4 -6 4 8.67 0.55
 4 -6 -4 11.07 0.6
 -4 -6 4 8.54 0.57
 4 6 -3 46.71 2.67
 -4 6 3 46.35 2.77
 4 6 -3 46.06 2.82
 4 -6 -3 47.03 2.69
 -4 -6 3 46.96 2.76
 4 -6 -3 48.12 2.82
 4 6 -2 7.62 0.52
 -4 6 2 8.92 0.52
 4 -6 -2 9.05 0.53
 4 -6 -2 8.8 0.5
 -4 -6 2 7.74 0.51
 -4 6 1 19.26 1.16
 4 6 -1 19.58 1.17
 4 6 -1 19.66 1.18
 -4 -6 1 19.66 1.16
 4 -6 -1 19.28 1.13
 4 6 0 21.31 1.29
 -4 6 0 22.11 1.29
 4 6 0 21.32 1.24
 4 6 0 20.94 1.31
 4 -6 0 22.29 1.32
 4 -6 0 22.04 1.26
 4 6 1 1.28 0.1
 4 6 1 1.4 0.11
 -4 6 -1 1.38 0.1
 4 6 1 1.33 0.09
 4 -6 1 1.3 0.11
 4 -6 1 1.31 0.11
 4 6 2 2.11 0.14
 -4 6 -2 2.08 0.14
 4 6 2 2.04 0.15
 4 6 2 2.13 0.15
 4 -6 2 2.14 0.15
 4 -6 2 2.2 0.16
 4 6 3 0.02 0.01
 4 6 3 0.01 0.02
 4 6 3 0.03 0.02
 -4 6 -3 0.01 0.01
 4 -6 3 0.04 0.02
 4 -6 3 0.01 0.02
 4 6 4 3.06 0.21
 4 6 4 3.45 0.21
 4 6 4 3.3 0.22
 4 -6 4 2.46 0.21
 4 -6 4 2.92 0.22
 4 6 5 1.89 0.15
 4 6 5 1.95 0.15
 4 6 5 1.84 0.16
 4 -6 5 1.76 0.17
 4 -6 5 1.85 0.16
 4 6 6 0.72 0.1
 4 6 6 0.51 0.09
 4 -6 6 0.36 0.1
 4 -6 6 0.5 0.1
 4 6 7 1.08 0.13
 4 6 7 0.93 0.13
 4 -6 7 1.15 0.14
 4 -6 7 1.13 0.14
 4 6 8 0.3 0.1
 -4 -6 -8 0.22 0.13
 4 -6 8 0.23 0.11
 4 -6 8 0.08 0.05
 4 6 9 0 0.04
 -4 6 -9 -0.02 0.06
 -4 -6 -9 0.07 0.06
 4 -6 9 0.01 0.04
 4 7 -12 1.97 0.22
 4 -7 -12 1.65 0.21
 4 -7 -12 1.87 0.22
 -4 -7 12 1.87 0.19
 4 7 -11 0.07 0.06
 4 -7 -11 0.01 0.04
 -4 -7 11 0.05 0.04
 4 -7 -11 0.07 0.06
 4 7 -10 0.25 0.12
 4 -7 -10 0.04 0.04
 4 -7 -10 0.06 0.05
 -4 -7 10 0.17 0.08
 4 7 -9 0.9 0.13
 4 -7 -9 0.9 0.13
 -4 -7 9 1.06 0.11
 4 -7 -9 0.84 0.12
 -4 7 8 3.88 0.25
 4 7 -8 3.66 0.28
 -4 -7 8 3.82 0.25
 4 -7 -8 3.65 0.27
 4 -7 -8 3.7 0.27
 4 7 -7 1.06 0.12
 -4 7 7 0.98 0.1
 4 -7 -7 1.03 0.11
 4 -7 -7 1.18 0.12
 -4 -7 7 1.08 0.1
 -4 7 6 0.98 0.09
 4 7 -6 1 0.1
 -4 -7 6 0.94 0.08
 4 -7 -6 0.87 0.1
 -4 -7 6 0.92 0.08
 4 -7 -6 1.09 0.1
 -4 7 5 0.46 0.06
 4 -7 -5 0.51 0.07
 4 -7 -5 0.53 0.07
 4 7 -4 0.01 0.01
 4 7 -4 0.06 0.04
 -4 7 4 0.05 0.04
 -4 -7 4 0.01 0.01
 4 -7 -4 0 0.02
 4 -7 -4 -0.01 0.02
 -4 -7 4 0 0.01
 -4 -7 3 18.09 0.95
 4 -7 -3 13.49 0.96
 4 7 -2 9.06 0.56
 4 7 -2 9.23 0.55
 -4 7 2 8.87 0.55
 4 -7 -2 9.22 0.56
 4 -7 -2 8.86 0.54
 -4 -7 2 9.1 0.55
 -4 7 1 4.77 0.32
 4 -7 -1 5.29 0.32
 4 -7 -1 5.47 0.33
 4 7 0 5.16 0.34
 -4 7 0 5.61 0.34
 4 7 0 5.29 0.31
 4 7 0 5.4 0.34
 4 -7 0 5.22 0.33
 4 -7 0 5.41 0.35
 4 7 1 18.16 1.19
 4 7 1 18.31 1.17
 -4 7 -1 21.15 1.17
 4 7 1 18.34 1.13
 4 -7 1 20.88 1.14
 4 -7 1 21.02 1.2
 4 7 2 24.74 1.51
 4 7 2 25.36 1.53
 4 7 2 25.46 1.45
 -4 7 -2 25.43 1.5
 4 -7 2 25.43 1.54
 4 -7 2 25.05 1.47
 4 7 3 1.52 0.13
 4 7 3 1.69 0.12
 4 7 3 1.67 0.13
 4 7 4 0.19 0.06
 4 7 4 0.28 0.06
 4 7 4 0.3 0.07
 4 -7 4 0.27 0.07
 4 -7 4 0.16 0.07
 4 7 5 1.11 0.11
 4 7 5 1.14 0.11
 4 7 5 1.14 0.11
 4 -7 5 0.99 0.12
 4 -7 5 1.09 0.12
 4 7 6 0 0.03
 4 7 6 -0.04 0.03
 4 -7 6 -0.03 0.03
 4 -7 6 -0.03 0.03
 4 7 7 0.2 0.09
 4 -7 7 -0.01 0.03
 4 -7 7 -0.04 0.04
 4 7 8 0.03 0.04
 -4 -7 -8 -0.06 0.05
 4 -7 8 0.01 0.04
 4 -7 8 0.01 0.04
 -4 7 -9 0.59 0.15
 4 7 9 0.4 0.12
 -4 -7 -9 0.52 0.14
 4 -7 9 0.22 0.12
 4 8 -12 0.82 0.17
 4 -8 -12 0.77 0.16
 -4 -8 12 0.6 0.13
 4 -8 -12 0.73 0.16
 4 8 -11 -0.04 0.05
 -4 -8 11 -0.02 0.03
 4 -8 -11 0.21 0.12
 4 -8 -11 0.02 0.05
 4 -8 -10 0.34 0.11
 4 -8 -10 0.2 0.11
 4 8 -9 0.08 0.04
 -4 -8 9 0.15 0.07
 4 -8 -9 0.04 0.04
 4 -8 -9 0.05 0.04
 -4 8 8 1.78 0.14
 4 -8 -8 1.88 0.16
 4 -8 -8 1.8 0.16
 4 8 -7 2.24 0.18
 -4 8 7 2.07 0.16
 4 -8 -7 2.33 0.18
 4 -8 -7 1.97 0.17
 -4 -8 7 2.26 0.16
 4 8 -6 2.59 0.19
 -4 -8 6 2.38 0.16
 -4 -8 6 2.34 0.16
 -4 8 5 9.12 0.58
 4 8 -5 9.45 0.59
 4 -8 -5 9.38 0.59
 4 -8 -5 8.77 0.56
 -4 -8 5 9.58 0.55
 -4 -8 5 9.8 0.57
 -4 8 4 2.57 0.19
 4 8 -4 2.85 0.19
 4 -8 -4 2.73 0.2
 -4 -8 4 3.09 0.17
 -4 -8 4 2.95 0.18
 4 -8 -4 2.4 0.19
 4 8 -3 17.2 1.07
 4 8 -3 17.26 1.01
 -4 8 3 17.46 1.06
 4 -8 -3 18.04 1.08
 4 -8 -3 17.89 1.03
 -4 -8 3 18.07 1.05
 4 8 -2 19.57 1.23
 -4 8 2 22.32 1.23
 4 8 -2 18.21 1.25
 4 -8 -2 22.02 1.25
 4 -8 -2 21.09 1.2
 4 8 -1 29.84 1.79
 4 8 -1 29.85 1.81
 -4 8 1 30.1 1.78
 4 -8 -1 30.31 1.74
 4 -8 -1 30.32 1.82
 4 8 0 4.31 0.25
 -4 8 0 4.41 0.27
 4 8 0 4.26 0.28
 4 8 0 4.21 0.28
 4 -8 0 4.38 0.27
 4 -8 0 4.27 0.28
 4 8 1 2.82 0.19
 -4 8 -1 2.99 0.19
 4 8 1 3 0.2
 4 8 1 2.85 0.18
 4 -8 1 2.88 0.2
 4 -8 1 2.89 0.2
 -4 8 -2 2.31 0.17
 4 8 2 2.54 0.16
 4 8 2 2.35 0.18
 4 8 2 2.58 0.17
 4 -8 2 2.52 0.18
 4 -8 2 2.59 0.19
 4 8 3 2.32 0.16
 4 8 3 2.38 0.17
 4 8 3 2.2 0.17
 -4 8 -3 2.26 0.15
 4 -8 3 2.19 0.18
 4 -8 3 2.25 0.17
 4 8 4 1.89 0.14
 4 8 4 1.91 0.15
 4 8 4 1.93 0.15
 4 -8 4 1.88 0.16
 4 -8 4 1.84 0.16
 4 8 5 0.02 0.03
 4 8 5 0.01 0.02
 4 8 5 0.02 0.03
 4 -8 5 0.01 0.03
 4 -8 5 0.01 0.03
 4 8 6 0.59 0.09
 4 8 6 0.46 0.09
 4 -8 6 0.41 0.1
 4 -8 6 0.48 0.09
 4 8 7 0.62 0.11
 4 -8 7 0.75 0.13
 -4 -8 -7 0.86 0.12
 4 -8 7 0.79 0.13
 4 8 8 0.06 0.04
 4 -8 8 0.05 0.05
 -4 -8 -8 0.08 0.05
 4 -8 8 0.04 0.04
 4 9 -11 0.12 0.07
 4 -9 -11 0.24 0.12
 -4 -9 11 0.22 0.09
 4 -9 -11 0.46 0.14
 4 9 -10 1.53 0.17
 4 -9 -10 1.38 0.16
 -4 -9 10 1.34 0.14
 4 -9 -10 1.26 0.17
 4 9 -9 0.02 0.04
 4 -9 -9 0.02 0.04
 4 -9 -9 0.04 0.04
 -4 -9 9 0 0.02
 -4 9 8 0.78 0.09
 4 9 -8 0.79 0.11
 -4 -9 8 0.73 0.09
 4 -9 -8 0.9 0.11
 4 -9 -8 0.85 0.11
 4 9 -7 14.3 0.9
 -4 9 7 14.75 0.88
 4 -9 -7 14.52 0.9
 -4 -9 7 14.68 0.85
 4 -9 -7 13.9 0.86
 4 9 -6 4.53 0.29
 -4 9 6 4.06 0.27
 4 -9 -6 4.08 0.28
 4 -9 -6 4 0.28
 -4 -9 6 4.05 0.26
 -4 -9 6 4.25 0.26
 -4 9 5 1.63 0.13
 4 -9 -5 1.77 0.14
 4 -9 -5 1.69 0.14
 4 9 -4 2.8 0.19
 -4 9 4 2.69 0.19
 -4 -9 4 2.76 0.17
 4 -9 -4 2.81 0.19
 -4 -9 4 2.69 0.18
 4 -9 -4 2.91 0.2
 4 9 -3 8.85 0.54
 4 9 -3 8.58 0.5
 4 9 -3 8.92 0.54
 -4 -9 3 8.63 0.53
 -4 9 2 0 0.01
 4 9 -2 0.01 0.01
 4 9 -2 0 0.01
 4 -9 -2 0.02 0.02
 4 -9 -2 0.06 0.04
 4 9 -1 7.28 0.44
 4 9 -1 7.46 0.43
 -4 9 1 6.68 0.43
 4 -9 -1 6.73 0.44
 4 -9 -1 6.73 0.42
 -4 9 0 13.42 0.82
 4 9 0 13.92 0.83
 4 9 0 12.89 0.82
 -4 -9 0 14.04 0.78
 4 -9 0 13.58 0.84
 4 -9 0 13.66 0.8
 -4 9 -1 4.86 0.31
 4 9 1 4.69 0.31
 4 9 1 4.66 0.31
 4 9 1 4.95 0.29
 4 -9 1 4.85 0.32
 4 -9 1 5.03 0.31
 4 9 2 3.47 0.24
 4 9 2 3.45 0.23
 4 9 2 3.45 0.21
 -4 9 -2 3.36 0.22
 4 -9 2 3.43 0.23
 4 -9 2 3.53 0.24
 4 9 3 6.82 0.45
 -4 9 -3 7.77 0.44
 4 9 3 7 0.43
 4 9 3 6.66 0.45
 4 -9 3 7.15 0.45
 4 -9 3 7.35 0.47
 4 9 4 3.52 0.25
 4 9 4 3.74 0.24
 4 9 4 3.61 0.25
 4 -9 4 3.61 0.26
 4 -9 4 3.58 0.25
 4 9 5 0.33 0.08
 4 9 5 0.37 0.07
 4 9 5 0.33 0.07
 4 -9 5 0.19 0.08
 4 -9 5 0.23 0.08
 4 9 6 0.23 0.07
 4 9 6 0.24 0.08
 4 9 6 0.24 0.07
 4 -9 6 0.22 0.09
 4 -9 6 0.23 0.09
 4 9 7 0.82 0.11
 4 -9 7 0.84 0.13
 4 -9 7 0.68 0.13
 -4 -9 -7 0.81 0.13
 4 9 8 0.18 0.1
 4 -9 8 0.04 0.05
 4 -9 8 0.06 0.04
 -4 -9 -8 0.05 0.05
 4 10 -11 -0.03 0.05
 4 -10 -11 0.02 0.05
 4 -10 -11 -0.03 0.04
 -4 -10 11 0.04 0.03
 4 10 -10 0.18 0.12
 -4 -10 10 0.29 0.08
 4 -10 -10 0.09 0.05
 4 -10 -10 0.16 0.1
 4 10 -9 0.45 0.11
 -4 10 9 0.5 0.09
 4 -10 -9 0.56 0.11
 4 -10 -9 0.48 0.1
 -4 -10 9 0.54 0.08
 4 10 -8 3.92 0.31
 -4 10 8 4.73 0.3
 4 -10 -8 4.86 0.31
 -4 -10 8 3.86 0.28
 4 -10 -8 4.6 0.31
 -4 10 7 1.08 0.11
 4 10 -7 1.14 0.12
 4 -10 -7 1.11 0.12
 -4 -10 7 1.09 0.1
 4 -10 -7 1.06 0.12
 4 10 -6 0.24 0.07
 -4 10 6 0.31 0.07
 -4 -10 6 0.17 0.05
 4 -10 -6 0.4 0.08
 4 -10 -6 0.42 0.07
 -4 10 5 4.46 0.31
 4 10 -5 4.69 0.31
 4 -10 -5 4.77 0.31
 -4 -10 5 4.87 0.3
 -4 -10 5 4.64 0.28
 4 -10 -5 4.79 0.31
 -4 10 4 11.63 0.67
 4 10 -4 10.25 0.68
 4 -10 -4 12.28 0.69
 -4 -10 4 10.25 0.66
 -4 -10 4 9.98 0.63
 4 -10 -4 11.89 0.66
 -4 10 3 21.55 1.29
 4 10 -3 21.48 1.31
 4 10 -3 22.15 1.29
 4 -10 -3 20.72 1.26
 -4 -10 3 22.04 1.29
 4 -10 -3 21.73 1.31
 -4 10 2 0.18 0.04
 4 10 -2 0.32 0.05
 4 -10 -2 0.17 0.04
 4 -10 -2 0.18 0.05
 -4 10 1 2.13 0.15
 4 10 -1 2.04 0.14
 4 10 -1 2.01 0.15
 4 -10 -1 2.07 0.15
 4 -10 -1 2.02 0.15
 4 10 0 1.54 0.1
 4 10 0 1.28 0.11
 -4 -10 0 1.27 0.08
 -4 10 -1 0.71 0.07
 4 10 1 0.66 0.06
 4 10 1 0.66 0.08
 4 -10 1 0.6 0.07
 -4 -10 -1 0.63 0.05
 4 -10 1 0.6 0.07
 -4 10 -2 0.75 0.07
 4 10 2 0.78 0.07
 4 10 2 0.75 0.07
 4 10 2 0.71 0.08
 4 -10 2 0.63 0.08
 4 -10 2 0.88 0.09
 -4 10 -3 6.74 0.41
 4 10 3 6.88 0.41
 4 10 3 6.47 0.43
 4 10 3 6.77 0.43
 4 -10 3 6.5 0.42
 4 -10 3 6.6 0.44
 4 10 4 0.98 0.1
 4 10 4 1 0.11
 4 10 4 1.14 0.1
 4 -10 4 1.01 0.12
 4 -10 4 0.96 0.11
 4 10 5 1.02 0.1
 4 10 5 0.88 0.1
 4 10 5 0.82 0.1
 4 -10 5 0.86 0.12
 4 -10 5 0.9 0.11
 4 10 6 0.16 0.07
 4 10 6 0.22 0.08
 4 10 6 0.19 0.08
 4 -10 6 0.25 0.1
 4 -10 6 0.16 0.09
 4 10 7 0.03 0.03
 -4 -10 -7 0.02 0.04
 4 -10 7 0.04 0.04
 4 -10 7 0.13 0.1
 4 10 8 0.04 0.04
 4 -10 8 0.02 0.04
 4 -10 8 -0.01 0.04
 4 11 -11 0.19 0.13
 -4 -11 11 -0.01 0.03
 4 -11 -11 -0.03 0.05
 4 -11 -11 0 0.04
 4 11 -10 0.04 0.05
 -4 -11 10 0 0.03
 4 -11 -10 0.14 0.1
 4 -11 -10 0 0.04
 -4 11 9 0.49 0.08
 4 11 -9 0.63 0.12
 4 -11 -9 0.44 0.1
 4 -11 -9 0.41 0.1
 -4 -11 9 0.52 0.08
 4 11 -8 1.4 0.15
 -4 11 8 1.26 0.12
 4 -11 -8 1.25 0.13
 -4 -11 8 1.33 0.12
 4 -11 -8 1.4 0.14
 -4 11 7 5.78 0.37
 4 11 -7 5.68 0.39
 4 -11 -7 5.63 0.38
 4 -11 -7 5.81 0.37
 -4 -11 7 5.64 0.35
 4 11 -6 7.48 0.47
 -4 11 6 7.12 0.45
 -4 -11 6 7.41 0.43
 4 -11 -6 6.51 0.44
 4 -11 -6 6.98 0.46
 4 11 -5 2.13 0.15
 -4 -11 5 1.8 0.13
 -4 -11 5 1.88 0.13
 -4 11 4 0.14 0.05
 4 11 -4 0.27 0.05
 -4 -11 4 0.2 0.03
 4 -11 -4 0.23 0.05
 4 -11 -4 0.17 0.06
 -4 -11 4 0.2 0.05
 -4 11 3 0.27 0.05
 4 11 -3 0.29 0.05
 4 11 -3 0.16 0.05
 4 -11 -3 0.28 0.06
 4 -11 -3 0.34 0.05
 -4 11 2 3.76 0.25
 4 11 -2 3.73 0.25
 4 11 -2 3.96 0.25
 4 -11 -2 3.86 0.25
 4 -11 -2 3.84 0.25
 4 11 -1 2.05 0.16
 -4 11 1 2.36 0.16
 4 11 -1 2.01 0.15
 4 -11 -1 2.17 0.16
 4 -11 -1 2.29 0.16
 -4 11 0 0.08 0.04
 4 11 0 0.06 0.03
 4 11 0 0.07 0.05
 4 -11 0 0.1 0.04
 -4 -11 0 0.03 0.02
 4 -11 0 0.1 0.05
 -4 11 -1 0.51 0.06
 4 -11 1 0.44 0.07
 4 -11 1 0.56 0.07
 4 11 2 3.13 0.23
 -4 11 -2 3.21 0.21
 4 11 2 3.47 0.21
 4 11 2 3.06 0.21
 4 -11 2 3.34 0.23
 -4 -11 -2 3.23 0.21
 4 -11 2 3.28 0.23
 4 11 3 1.87 0.14
 4 11 3 1.79 0.15
 -4 11 -3 1.66 0.13
 4 11 3 1.95 0.13
 4 -11 3 1.75 0.15
 4 -11 3 1.69 0.15
 4 11 4 4.25 0.27
 4 11 4 3.88 0.28
 4 11 4 4.16 0.28
 4 -11 4 4.1 0.29
 4 -11 4 4.12 0.28
 4 11 5 0.28 0.08
 4 11 5 0.33 0.07
 4 11 5 0.21 0.07
 4 -11 5 0.22 0.09
 4 -11 5 0.42 0.09
 4 11 6 0.15 0.07
 4 -11 6 0.16 0.1
 4 -11 6 0.15 0.09
 4 11 7 0.42 0.1
 4 -11 7 0.51 0.11
 4 -11 7 0.35 0.11
 4 11 8 0 0.04
 -4 -11 -8 0 0.04
 4 -11 8 0 0.05
 4 -11 8 0.01 0.04
 4 12 -11 -0.02 0.05
 -4 -12 11 0.01 0.03
 4 -12 -11 0.02 0.04
 4 -12 -11 -0.06 0.04
 4 12 -10 0.01 0.05
 -4 -12 10 0 0.02
 4 -12 -10 0.01 0.04
 4 -12 -10 0.16 0.11
 -4 12 9 0.02 0.02
 4 12 -9 0.03 0.04
 4 -12 -9 0.24 0.09
 -4 -12 9 0.03 0.03
 4 -12 -9 0.03 0.04
 -4 12 8 0.56 0.09
 4 12 -8 0.5 0.11
 4 -12 -8 0.68 0.1
 -4 -12 8 0.58 0.08
 4 -12 -8 0.58 0.11
 4 12 -7 0.14 0.08
 4 -12 -7 0.1 0.07
 4 -12 -7 0.13 0.07
 -4 -12 7 0.1 0.05
 4 12 -6 1.28 0.12
 -4 12 6 1.1 0.11
 4 -12 -6 1.14 0.12
 4 -12 -6 1.27 0.12
 -4 -12 6 1.2 0.1
 4 12 -5 25.66 1.56
 -4 12 5 24.31 1.53
 -4 -12 5 25.83 1.47
 4 -12 -5 25.7 1.56
 -4 -12 5 26.8 1.52
 4 -12 -5 25.29 1.5
 4 12 -4 2.06 0.14
 4 12 -4 1.7 0.13
 -4 -12 4 1.88 0.12
 -4 -12 4 1.67 0.13
 -4 12 3 9.25 0.58
 4 12 -3 9.68 0.57
 4 12 -3 9.57 0.58
 4 -12 -3 8.93 0.56
 4 -12 -3 9.18 0.58
 -4 12 2 2.95 0.2
 4 -12 -2 2.82 0.2
 4 -12 -2 2.97 0.2
 -4 12 1 8.52 0.53
 4 12 -1 8.81 0.53
 4 12 -1 8.58 0.54
 4 -12 -1 8.51 0.54
 4 -12 -1 8.57 0.52
 -4 12 0 2.17 0.16
 4 12 0 2.84 0.18
 4 -12 0 2.15 0.17
 4 -12 0 2.2 0.17
 4 12 1 22.64 1.39
 -4 12 -1 23.04 1.38
 4 12 1 23.31 1.39
 4 -12 1 22.61 1.35
 -4 -12 -1 23.29 1.33
 4 -12 1 23.56 1.41
 4 12 2 5.29 0.3
 -4 12 -2 3.89 0.29
 4 12 2 5.08 0.31
 4 -12 2 3.8 0.3
 -4 -12 -2 5.39 0.28
 4 -12 2 3.83 0.3
 4 12 3 0.11 0.05
 -4 12 -3 0.01 0.01
 4 12 3 0.04 0.02
 4 12 3 0.11 0.06
 -4 -12 -3 0.03 0.02
 4 -12 3 0.01 0.03
 4 -12 3 0.05 0.03
 4 12 4 0.01 0.02
 4 12 4 0.01 0.02
 4 12 4 0.02 0.02
 4 -12 4 0.02 0.03
 -4 -12 -4 0 0.02
 4 -12 4 0.03 0.03
 4 12 5 1.84 0.15
 4 12 5 1.97 0.17
 4 -12 5 2.04 0.18
 4 -12 5 1.78 0.17
 -4 -12 -5 1.88 0.16
 4 12 6 0.76 0.1
 4 12 6 0.69 0.1
 4 -12 6 0.56 0.12
 -4 -12 -6 0.61 0.1
 4 -12 6 0.54 0.11
 4 12 7 0.03 0.04
 4 -12 7 0.04 0.04
 4 -12 7 0.03 0.04
 -4 -12 -7 0.02 0.04
 4 -12 8 0.19 0.12
 4 -12 8 0.02 0.04
 -4 -12 -8 0.17 0.11
 4 13 -11 0.82 0.16
 4 -13 -11 0.87 0.14
 4 -13 -11 0.76 0.15
 4 13 -10 0.18 0.12
 4 -13 -10 0.08 0.05
 4 -13 -10 0.02 0.04
 -4 13 9 0.09 0.07
 4 13 -9 -0.03 0.04
 4 -13 -9 0.04 0.04
 -4 -13 9 -0.01 0.02
 4 -13 -9 0.09 0.04
 -4 13 8 0.01 0.02
 4 13 -8 0.01 0.04
 4 -13 -8 0.04 0.03
 4 -13 -8 0.04 0.03
 -4 -13 8 -0.01 0.02
 4 13 -7 0.37 0.09
 -4 13 7 0.48 0.08
 4 -13 -7 0.62 0.1
 4 -13 -7 0.52 0.08
 -4 -13 7 0.39 0.07
 4 13 -6 1.03 0.11
 -4 13 6 0.99 0.11
 -4 -13 6 1.04 0.09
 4 -13 -6 0.95 0.1
 4 -13 -6 0.79 0.11
 -4 13 5 1.19 0.12
 4 -13 -5 1.23 0.13
 4 -13 -5 1.22 0.12
 -4 -13 5 1.92 0.12
 4 13 -4 0.26 0.06
 4 13 -4 0.39 0.06
 -4 13 4 0.28 0.06
 4 -13 -4 0.31 0.06
 4 -13 -4 0.27 0.07
 -4 -13 4 0.32 0.05
 4 13 -3 6.1 0.38
 4 13 -3 5.72 0.38
 -4 13 3 6.04 0.38
 4 -13 -3 6.08 0.38
 4 -13 -3 6.06 0.38
 4 13 -2 0.34 0.06
 -4 13 2 0.36 0.06
 4 13 -2 0.35 0.05
 4 -13 -2 0.32 0.06
 4 -13 -2 0.39 0.07
 4 13 -1 18.01 1.11
 -4 13 1 19.22 1.11
 4 13 -1 17.61 1.11
 4 -13 -1 18.74 1.12
 4 -13 -1 18.4 1.08
 -4 13 0 0.06 0.04
 4 13 0 0.11 0.06
 4 13 0 0.01 0.01
 4 -13 0 -0.02 0.02
 4 -13 0 0.17 0.05
 -4 13 -1 8.56 0.54
 4 13 1 9.65 0.55
 4 13 1 9.1 0.56
 4 -13 1 8.52 0.54
 4 -13 1 8.38 0.56
 4 13 2 2.3 0.19
 -4 13 -2 2.53 0.17
 -4 -13 -2 2.49 0.16
 4 -13 2 2.56 0.19
 4 -13 2 2.52 0.19
 4 13 3 2.26 0.19
 4 -13 3 2.47 0.19
 -4 -13 -3 2.52 0.17
 4 -13 3 2.47 0.19
 4 13 4 0.03 0.02
 4 -13 4 0.12 0.08
 -4 -13 -4 0.13 0.06
 4 -13 4 0.09 0.07
 4 13 5 2.79 0.21
 4 13 5 2.65 0.19
 -4 -13 -5 2.6 0.19
 4 -13 5 2.47 0.21
 4 -13 5 2.39 0.21
 4 13 6 0.82 0.12
 4 13 6 1.03 0.13
 4 -13 6 1.14 0.14
 -4 -13 -6 0.85 0.11
 4 -13 6 1.31 0.15
 4 -13 7 0.2 0.11
 -4 -13 -7 0.19 0.09
 4 -13 7 0.05 0.04
 4 -13 8 0.47 0.12
 4 14 -11 0.29 0.13
 4 14 -10 0.81 0.14
 4 -14 -10 0.94 0.14
 4 -14 -10 0.81 0.13
 4 14 -9 0.52 0.11
 -4 14 9 0.39 0.09
 4 -14 -9 0.38 0.1
 4 -14 -9 0.52 0.12
 4 14 -8 0.01 0.03
 -4 14 8 0.02 0.02
 4 -14 -8 0.04 0.03
 4 -14 -8 0.06 0.04
 4 14 -7 1.25 0.13
 -4 14 7 1.41 0.13
 4 -14 -7 1.56 0.14
 4 -14 -7 1.35 0.13
 4 14 -6 2.33 0.2
 -4 14 6 2.7 0.2
 4 -14 -6 2.68 0.2
 4 -14 -6 2.96 0.2
 4 14 -5 1.81 0.14
 -4 14 5 1.63 0.14
 4 -14 -5 1.6 0.15
 -4 -14 5 1.85 0.13
 4 -14 -5 1.82 0.14
 4 14 -4 17.25 1.11
 -4 14 4 18.55 1.1
 4 14 -4 17.27 1.09
 4 -14 -4 19.29 1.08
 4 -14 -4 18.61 1.11
 4 14 -3 14.48 0.87
 4 14 -3 14.61 0.86
 -4 14 3 13.92 0.86
 4 -14 -3 13.89 0.84
 4 -14 -3 13.99 0.87
 4 14 -2 27.55 1.9
 4 14 -2 29.05 1.88
 -4 14 2 33.73 1.89
 4 -14 -2 34.42 1.91
 4 -14 -2 33.81 1.84
 4 14 -1 13.73 0.86
 -4 14 1 14.42 0.86
 4 14 -1 14.15 0.86
 4 -14 -1 14.05 0.84
 4 -14 -1 14.26 0.87
 -4 14 0 7.49 0.46
 4 -14 0 7.4 0.47
 4 -14 0 7.02 0.45
 4 14 1 2.98 0.22
 -4 14 -1 2.88 0.2
 4 -14 1 2.95 0.21
 4 -14 1 2.96 0.21
 4 14 2 6.41 0.48
 -4 14 -2 8.1 0.47
 4 -14 2 7.81 0.49
 4 -14 2 7.96 0.48
 4 14 3 1.2 0.13
 4 -14 3 1.63 0.14
 4 -14 3 1.56 0.14
 4 14 4 1.21 0.13
 4 -14 4 1.03 0.13
 -4 -14 -4 1.15 0.11
 4 -14 4 0.91 0.12
 4 14 5 0.18 0.08
 4 -14 5 0.2 0.09
 4 -14 5 0.04 0.03
 4 14 6 0 0.02
 4 -14 6 0 0.04
 4 -14 6 0.03 0.04
 4 -14 7 0.09 0.05
 4 -14 7 0.04 0.04
 4 -14 8 0.01 0.04
 4 15 -11 1.19 0.18
 4 -15 -11 1.14 0.16
 4 15 -10 0.47 0.14
 4 -15 -10 0.43 0.12
 -4 15 9 0.01 0.02
 4 15 -9 0.19 0.1
 4 -15 -9 -0.01 0.04
 4 -15 -9 -0.03 0.03
 -4 15 8 0.3 0.08
 4 15 -8 0.34 0.1
 4 -15 -8 0.29 0.09
 4 -15 -8 0.24 0.08
 -4 15 7 0.32 0.09
 4 15 -7 0.65 0.09
 4 -15 -7 0.32 0.08
 4 -15 -7 0.37 0.09
 4 15 -6 4.18 0.29
 -4 15 6 3.92 0.28
 4 -15 -6 4.1 0.28
 4 -15 -6 4.06 0.28
 4 15 -5 9.95 0.62
 -4 15 5 9.69 0.62
 4 -15 -5 10.01 0.61
 -4 -15 5 9.88 0.61
 4 -15 -5 10.17 0.62
 -4 15 4 0.01 0.02
 4 15 -4 0 0.01
 4 15 -4 0.11 0.05
 4 -15 -4 0.06 0.05
 4 -15 -4 0.02 0.03
 -4 15 3 6.68 0.41
 4 15 -3 5.62 0.39
 4 15 -3 5.64 0.4
 4 -15 -3 6.83 0.4
 4 -15 -3 6.97 0.4
 -4 15 2 0.47 0.07
 4 15 -2 0.41 0.08
 4 -15 -2 0.29 0.06
 4 -15 -2 0.45 0.08
 -4 15 1 6.32 0.41
 4 15 -1 7.07 0.42
 4 -15 -1 6.35 0.41
 4 -15 -1 5.91 0.4
 -4 15 0 0.93 0.09
 4 15 0 0.86 0.1
 4 -15 0 0.83 0.1
 4 -15 0 0.97 0.1
 -4 15 -1 2.02 0.15
 4 15 1 2.02 0.16
 4 -15 1 1.88 0.16
 4 -15 1 2.04 0.16
 -4 15 -2 1.32 0.11
 4 15 2 1.3 0.13
 4 -15 2 1.46 0.13
 4 -15 2 1.4 0.13
 4 15 3 0.4 0.09
 4 -15 3 0.33 0.1
 4 -15 3 0.33 0.08
 4 15 4 -0.02 0.02
 4 -15 4 -0.02 0.03
 4 -15 4 -0.01 0.03
 4 15 5 0.78 0.12
 4 -15 5 0.93 0.12
 4 -15 5 0.92 0.13
 4 15 6 -0.01 0.02
 4 -15 6 -0.01 0.03
 4 -15 6 0 0.04
 4 -15 7 1.1 0.15
 4 -15 7 0.74 0.14
 -4 15 -8 0.01 0.06
 4 -15 8 0.41 0.12
 4 16 -10 0.31 0.13
 4 -16 -10 0.38 0.13
 -4 16 9 -0.01 0.02
 4 16 -9 -0.02 0.04
 4 -16 -9 0 0.04
 4 16 -8 2.1 0.2
 -4 16 8 2.3 0.19
 4 -16 -8 2.29 0.2
 4 -16 -8 2.59 0.2
 4 16 -7 0.14 0.08
 4 -16 -7 0.14 0.07
 4 -16 -7 0.04 0.03
 -4 16 6 1.27 0.13
 4 -16 -6 1.37 0.14
 4 -16 -6 1.45 0.13
 4 16 -5 0.01 0.01
 -4 16 5 0.01 0.02
 4 16 -5 0.14 0.06
 4 -16 -5 -0.01 0.02
 4 -16 -5 0.02 0.02
 -4 -16 5 0.01 0.01
 4 16 -4 0.1 0.05
 -4 16 4 0.16 0.07
 4 16 -4 0.18 0.05
 4 -16 -4 0.11 0.07
 4 -16 -4 0.17 0.05
 -4 16 3 1.31 0.12
 4 16 -3 1.08 0.11
 4 -16 -3 1.24 0.1
 4 -16 -3 1.08 0.12
 -4 16 2 22.35 1.28
 4 16 -2 19.4 1.27
 4 -16 -2 21.87 1.29
 4 -16 -2 21.23 1.25
 4 16 -1 25.33 1.52
 -4 16 1 26.24 1.52
 4 -16 -1 24.77 1.48
 4 -16 -1 25.16 1.54
 -4 16 0 21.67 1.3
 4 -16 0 21.89 1.32
 4 -16 0 21.54 1.28
 4 16 1 5.78 0.41
 -4 16 -1 6.35 0.4
 4 -16 1 6.24 0.4
 4 -16 1 6.61 0.41
 4 16 2 1.79 0.15
 -4 16 -2 1.46 0.12
 4 -16 2 1.41 0.14
 4 -16 2 1.31 0.13
 4 16 3 8.8 0.56
 4 -16 3 8.47 0.56
 4 -16 3 8.96 0.55
 4 16 4 1 0.14
 4 -16 4 1.65 0.15
 4 -16 4 1.47 0.15
 4 16 5 0.72 0.11
 4 -16 5 0.67 0.12
 4 -16 5 0.67 0.12
 4 16 6 0.14 0.09
 4 -16 6 0.09 0.05
 4 -16 6 0.18 0.11
 4 -16 7 0.02 0.04
 4 -16 7 -0.03 0.04
 4 17 -10 0.02 0.05
 4 -17 -10 0.04 0.05
 -4 17 9 0.03 0.02
 4 17 -9 0.02 0.04
 4 -17 -9 0.04 0.04
 4 17 -8 1.17 0.14
 -4 17 8 1.52 0.15
 4 -17 -8 1.37 0.16
 4 17 -7 2.03 0.18
 -4 17 7 2.32 0.19
 4 -17 -7 2.25 0.19
 4 17 -6 3.18 0.22
 -4 17 6 3.07 0.23
 4 -17 -6 2.99 0.22
 4 -17 -6 2.9 0.23
 4 17 -5 0.37 0.06
 -4 17 5 0.32 0.08
 4 17 -5 0.27 0.07
 4 -17 -5 0.27 0.09
 4 -17 -5 0.31 0.07
 -4 17 4 0.53 0.08
 4 17 -4 0.51 0.07
 4 -17 -4 0.58 0.09
 4 -17 -4 0.52 0.07
 4 17 -3 11.81 0.7
 -4 17 3 11.19 0.71
 4 -17 -3 11.63 0.71
 4 -17 -3 11.03 0.69
 -4 17 2 0.16 0.07
 4 17 -2 0.01 0.02
 4 -17 -2 0.01 0.03
 4 -17 -2 0.01 0.02
 4 17 -1 10.22 0.76
 -4 17 1 13.44 0.76
 4 -17 -1 12.72 0.76
 4 -17 -1 13.04 0.75
 -4 17 0 2.54 0.18
 4 17 0 2.46 0.19
 4 -17 0 2.5 0.19
 4 -17 0 2.28 0.18
 -4 17 -1 4.79 0.31
 4 17 1 4.59 0.32
 4 -17 1 4.66 0.32
 4 -17 1 4.63 0.32
 4 17 2 2.07 0.18
 -4 17 -2 2.31 0.17
 4 -17 2 2.26 0.18
 4 -17 2 2.29 0.18
 4 17 3 7.42 0.46
 4 -17 3 6.81 0.45
 4 -17 3 6.45 0.45
 4 17 4 0.75 0.12
 4 -17 4 0.71 0.11
 4 -17 4 0.83 0.12
 4 17 5 0.04 0.02
 4 -17 5 0.05 0.04
 4 -17 5 0.11 0.09
 4 17 6 0 0.02
 4 -17 6 0 0.04
 4 -17 6 0 0.04
 4 -17 7 -0.07 0.04
 4 -17 7 -0.05 0.03
 4 18 -10 0.59 0.13
 4 -18 -10 0.5 0.13
 4 18 -9 0.02 0.04
 -4 18 9 -0.01 0.02
 4 -18 -9 0.18 0.1
 -4 18 8 0.13 0.1
 4 18 -8 0.34 0.1
 4 -18 -8 0.28 0.1
 4 18 -7 0.05 0.04
 -4 18 7 0.17 0.09
 4 -18 -7 0.07 0.04
 -4 18 6 0.31 0.09
 -4 18 5 0.21 0.08
 4 -18 -5 0.19 0.08
 4 18 -4 15.4 0.86
 -4 18 4 13.71 0.87
 4 -18 -4 13.69 0.87
 4 -18 -4 13.59 0.85
 -4 18 3 0.52 0.09
 4 18 -3 0.56 0.09
 4 -18 -3 0.61 0.09
 4 -18 -3 0.58 0.07
 -4 18 2 1.92 0.16
 4 18 -2 2.07 0.16
 4 -18 -2 1.86 0.16
 4 -18 -2 2.03 0.15
 -4 18 1 0.1 0.07
 4 -18 -1 0.04 0.03
 4 -18 -1 0.19 0.05
 4 18 0 0.65 0.1
 -4 18 0 0.98 0.1
 4 -18 0 0.96 0.1
 4 -18 0 1.09 0.12
 -4 18 -1 7.01 0.45
 4 18 1 6.9 0.46
 4 -18 1 7.06 0.45
 4 -18 1 7.18 0.46
 -4 18 -2 4.92 0.31
 4 18 2 4.06 0.32
 4 -18 2 5.25 0.33
 4 -18 2 4.72 0.32
 4 -18 3 0.18 0.09
 4 -18 3 0.12 0.07
 4 18 4 0.16 0.1
 4 -18 4 0.34 0.1
 4 -18 4 0.32 0.09
 4 18 5 0.33 0.11
 4 -18 5 0.34 0.1
 4 -18 5 0.53 0.12
 4 18 6 0.34 0.11
 4 -18 6 0.08 0.05
 4 -18 6 0.26 0.1
 4 18 7 0.23 0.11
 4 -18 7 0.04 0.04
 4 -18 7 0 0.04
 4 -19 -10 0.18 0.11
 -4 19 9 0 0.02
 4 -19 -9 0.03 0.04
 4 -19 -8 0.24 0.11
 -4 19 7 1.15 0.13
 4 -19 -7 0.97 0.14
 -4 19 6 -0.01 0.02
 4 -19 -6 0.02 0.03
 -4 19 5 2.47 0.19
 4 -19 -5 2.27 0.19
 -4 19 4 2.94 0.23
 4 19 -4 3.13 0.22
 4 -19 -4 2.89 0.22
 -4 19 3 3.57 0.25
 4 19 -3 3.62 0.25
 4 -19 -3 3.41 0.25
 -4 19 2 0.01 0.02
 4 19 -2 0.01 0.02
 4 -19 -2 0.01 0.02
 4 -19 -2 0.02 0.03
 4 19 -1 0.17 0.07
 -4 19 1 0.01 0.02
 4 -19 -1 0.04 0.03
 4 -19 -1 0.1 0.05
 -4 19 0 1.36 0.12
 4 19 0 1.37 0.14
 4 -19 0 1.26 0.13
 4 -19 0 1.51 0.12
 4 19 1 1.32 0.13
 -4 19 -1 1.12 0.11
 4 -19 1 0.98 0.12
 4 -19 1 1.12 0.11
 4 19 2 1.95 0.17
 -4 19 -2 1.83 0.15
 4 -19 2 1.94 0.16
 4 -19 2 2.05 0.17
 4 19 3 1.61 0.17
 4 -19 3 1.85 0.16
 4 -19 3 2.05 0.18
 4 19 4 0.01 0.02
 4 -19 4 0.01 0.03
 4 -19 4 0.18 0.08
 4 19 5 2.74 0.22
 4 -19 5 2.29 0.21
 4 -19 5 2.61 0.22
 4 19 6 0.01 0.02
 4 -19 6 0.01 0.04
 4 -19 6 0.03 0.04
 4 19 7 -0.01 0.02
 4 -19 7 0 0.04
 4 -19 7 0.06 0.05
 -4 20 10 0 0.02
 4 -20 -10 0.02 0.04
 -4 20 9 0.04 0.02
 4 -20 -9 0.04 0.05
 4 -20 -8 0.24 0.11
 -4 20 7 0.48 0.11
 4 -20 -7 0.31 0.1
 -4 20 6 2.05 0.18
 4 -20 -6 2.11 0.19
 -4 20 5 0.49 0.1
 4 -20 -5 0.63 0.1
 -4 20 4 1.29 0.14
 4 20 -4 1.5 0.13
 4 -20 -4 1.32 0.14
 4 20 -3 1.88 0.16
 -4 20 3 1.92 0.17
 4 -20 -3 1.99 0.17
 -4 20 2 4.86 0.32
 4 20 -2 4.44 0.32
 4 -20 -2 4.97 0.33
 -4 20 1 0.94 0.1
 4 20 -1 1.01 0.12
 4 -20 -1 0.86 0.12
 4 -20 -1 0.89 0.1
 -4 20 0 0 0.02
 4 20 0 0 0.02
 4 -20 0 -0.01 0.03
 4 -20 0 0.01 0.02
 4 20 1 0.11 0.08
 4 -20 1 0.1 0.06
 4 -20 1 0.02 0.03
 4 20 2 0.32 0.1
 4 -20 2 0.25 0.07
 4 -20 2 0.22 0.09
 4 20 3 0.03 0.02
 4 -20 3 0.04 0.03
 4 -20 3 0 0.03
 4 20 4 0.03 0.03
 4 -20 4 -0.02 0.03
 4 -20 4 -0.01 0.03
 4 20 5 0.01 0.02
 4 -20 5 0.17 0.12
 4 -20 5 0.05 0.04
 4 20 6 0.04 0.03
 4 -20 6 -0.05 0.03
 4 -20 6 0 0.04
 -4 21 9 0.33 0.11
 4 -21 -9 0.34 0.12
 -4 21 8 0.04 0.03
 4 -21 -8 0.03 0.04
 -4 21 7 0.29 0.1
 4 -21 -7 0.29 0.1
 -4 21 6 0.63 0.11
 4 -21 -6 0.63 0.11
 -4 21 5 0.95 0.12
 4 -21 -5 1.09 0.13
 -4 21 4 0.55 0.11
 4 21 -4 0.69 0.09
 4 -21 -4 0.62 0.1
 -4 21 3 0.74 0.11
 4 21 -3 1.06 0.11
 4 -21 -3 0.63 0.11
 -4 21 2 1.65 0.16
 4 21 -2 2 0.16
 4 -21 -2 1.74 0.16
 -4 21 1 1.53 0.14
 4 21 -1 1.75 0.15
 4 -21 -1 1.47 0.15
 -4 21 0 0.51 0.09
 4 21 0 0.57 0.1
 4 -21 0 0.5 0.1
 4 21 1 0.73 0.11
 -4 21 -1 0.7 0.09
 4 -21 1 0.57 0.11
 4 -21 1 0.58 0.08
 4 21 2 0.01 0.02
 4 -21 2 0.01 0.03
 4 -21 2 0.07 0.04
 4 21 3 2.06 0.19
 4 -21 3 2.01 0.18
 4 -21 3 1.83 0.17
 4 21 4 0.05 0.03
 4 -21 4 0.03 0.04
 4 -21 4 0.14 0.08
 4 21 5 0.02 0.03
 4 -21 5 -0.02 0.04
 4 -21 5 -0.01 0.03
 4 21 6 0.04 0.03
 4 -21 6 -0.02 0.04
 4 -21 6 0.01 0.04
 -4 22 9 0 0.02
 4 -22 -9 -0.03 0.04
 -4 22 8 0.35 0.12
 4 -22 -8 0.43 0.12
 -4 22 7 0.19 0.11
 4 -22 -7 0.22 0.11
 -4 22 6 0.73 0.12
 4 -22 -6 0.66 0.11
 -4 22 5 0.13 0.09
 4 -22 -5 0.19 0.09
 -4 22 4 2.03 0.19
 4 22 -4 2.15 0.17
 4 -22 -4 2.34 0.19
 -4 22 3 0.3 0.09
 4 22 -3 0.32 0.08
 4 -22 -3 0.25 0.09
 4 22 -2 2.49 0.19
 -4 22 2 2.23 0.19
 4 -22 -2 2.34 0.2
 4 22 -1 0.7 0.11
 -4 22 1 0.58 0.1
 4 -22 -1 0.68 0.11
 4 22 0 7.35 0.49
 -4 22 0 7.47 0.48
 4 -22 0 7.54 0.48
 4 22 1 0.03 0.02
 -4 22 -1 0.02 0.02
 4 -22 1 0.02 0.03
 4 22 2 0.3 0.1
 4 -22 2 0.25 0.09
 4 22 3 0.02 0.02
 4 -22 3 0.03 0.04
 4 -22 3 0.17 0.07
 4 22 4 0.29 0.11
 4 -22 4 0.19 0.08
 4 -22 4 0.28 0.11
 4 22 5 0.26 0.12
 4 -22 5 0.25 0.09
 4 -22 5 0.07 0.05
 4 22 6 0.41 0.12
 4 -22 6 0.12 0.1
 4 -22 6 0.08 0.05
 -4 23 9 0.02 0.02
 4 -23 -9 0.02 0.04
 -4 23 8 0.7 0.13
 4 -23 -8 0.72 0.13
 -4 23 7 1.98 0.19
 4 -23 -7 2.05 0.19
 -4 23 6 0.4 0.11
 4 -23 -6 0.14 0.09
 -4 23 5 0.15 0.09
 4 -23 -5 0.06 0.04
 -4 23 4 2.17 0.19
 4 23 -4 1.97 0.17
 4 -23 -4 2.14 0.19
 -4 23 3 0.6 0.11
 4 23 -3 0.6 0.1
 4 -23 -3 0.58 0.11
 4 23 -2 0.13 0.08
 -4 23 2 0.3 0.09
 4 -23 -2 0.19 0.09
 -4 23 1 1.9 0.17
 4 23 -1 1.47 0.16
 4 -23 -1 2.01 0.17
 4 23 0 1.52 0.15
 -4 23 0 1.15 0.13
 4 -23 0 1.21 0.15
 -4 23 -1 0.01 0.02
 4 23 1 -0.02 0.02
 4 -23 1 0 0.03
 4 23 2 0.14 0.1
 4 -23 2 0.06 0.04
 4 23 3 0.25 0.11
 4 -23 3 0.15 0.1
 4 23 4 0.35 0.12
 4 -23 4 0.39 0.12
 4 23 5 0.01 0.03
 4 -23 5 0.02 0.04
 4 23 6 0.06 0.03
 4 -23 6 0.02 0.05
 -4 24 8 -0.01 0.03
 4 -24 -8 0 0.04
 4 -24 -7 0.29 0.11
 -4 24 6 0.22 0.1
 4 -24 -6 0.17 0.1
 -4 24 5 0.15 0.09
 4 -24 -5 0.22 0.09
 -4 24 4 0.48 0.11
 4 24 -4 0.43 0.09
 4 -24 -4 0.27 0.1
 -4 24 3 0.79 0.12
 4 24 -3 0.65 0.1
 4 -24 -3 0.78 0.12
 -4 24 2 0.2 0.1
 4 24 -2 0.35 0.09
 4 -24 -2 0.18 0.1
 4 24 -1 0.01 0.02
 -4 24 1 0.01 0.02
 4 -24 -1 0.04 0.03
 4 24 0 0 0.02
 -4 24 0 0 0.02
 4 -24 0 0.04 0.04
 4 24 1 0.66 0.12
 -4 24 -1 0.54 0.09
 4 -24 1 0.62 0.12
 4 24 2 0.86 0.14
 4 -24 2 1.03 0.14
 4 24 3 0.44 0.12
 4 -24 3 0.43 0.13
 4 24 4 0.39 0.13
 4 -24 4 0.32 0.12
 4 24 5 0.42 0.13
 4 -24 5 0.33 0.14
 -4 25 8 0.02 0.03
 4 -25 -8 0.03 0.05
 -4 25 7 0 0.02
 4 -25 -7 -0.05 0.03
 -4 25 6 0.02 0.03
 4 -25 -6 0.02 0.04
 4 -25 -5 0.21 0.1
 -4 25 4 0.05 0.03
 4 -25 -4 0.14 0.09
 4 25 -3 0.31 0.1
 -4 25 3 0.66 0.11
 4 -25 -3 0.54 0.11
 4 25 -2 3.44 0.26
 -4 25 2 3.59 0.27
 4 -25 -2 3.37 0.26
 4 25 -1 0.38 0.11
 -4 25 1 0.3 0.1
 4 -25 -1 0.2 0.1
 -4 25 0 1.28 0.14
 4 25 0 1.36 0.16
 4 -25 0 1.49 0.16
 -4 25 -1 0.41 0.09
 4 25 1 0.36 0.11
 4 -25 1 0.6 0.12
 4 25 2 0.53 0.13
 4 -25 2 0.64 0.13
 4 25 3 0.64 0.14
 4 -25 3 0.75 0.14
 4 25 4 0.32 0.13
 4 -25 4 0.46 0.12
 4 -25 5 0.25 0.13
 -4 26 8 0.03 0.03
 4 -26 -8 0.03 0.04
 4 -26 -7 0.42 0.12
 -4 26 6 0.41 0.13
 4 -26 -6 0.54 0.13
 -4 26 5 0.4 0.12
 4 -26 -5 0.34 0.11
 -4 26 4 0.24 0.12
 4 -26 -4 0.31 0.1
 -4 26 3 0.22 0.1
 4 26 -3 0.02 0.02
 4 -26 -3 0.08 0.04
 4 -26 -2 0.14 0.1
 -4 26 1 0.23 0.1
 4 -26 -1 0.15 0.1
 -4 26 0 0.02 0.02
 4 26 0 -0.01 0.02
 4 -26 0 0.01 0.04
 4 26 1 0.02 0.03
 4 -26 1 0.03 0.04
 4 26 2 0.32 0.13
 4 -26 2 0.27 0.12
 4 26 3 0.04 0.03
 4 -26 3 0.13 0.11
 4 26 4 0.02 0.03
 4 -26 4 0.08 0.05
 -4 27 7 0.64 0.14
 4 -27 -7 0.48 0.12
 -4 27 6 0.35 0.12
 4 -27 -6 0.53 0.12
 -4 27 5 0.85 0.14
 4 -27 -5 0.94 0.14
 -4 27 4 0.02 0.03
 4 -27 -4 0.04 0.04
 4 27 -3 -0.04 0.02
 -4 27 3 0.02 0.03
 4 -27 -3 0.07 0.04
 -4 27 2 0.06 0.03
 4 27 -2 0.18 0.1
 4 -27 -2 0.35 0.1
 4 27 -1 0.08 0.03
 -4 27 1 0.18 0.11
 4 -27 -1 0.27 0.1
 -4 27 0 0.35 0.1
 4 -27 0 0.29 0.11
 4 27 1 0.93 0.15
 4 -27 1 1.02 0.15
 4 27 2 0.03 0.03
 4 -27 2 0.1 0.05
 4 27 3 0.25 0.14
 4 -27 3 0.28 0.12
 4 -27 4 0.16 0.12
 -4 28 7 0.01 0.03
 4 -28 -7 0.01 0.04
 -4 28 6 0.03 0.03
 4 -28 -6 0.16 0.1
 -4 28 5 0.22 0.11
 4 -28 -5 0.25 0.12
 -4 28 4 0.04 0.03
 4 -28 -4 0.06 0.04
 4 28 -3 0.14 0.1
 -4 28 3 0.03 0.03
 4 -28 -3 0.03 0.04
 4 28 -2 0.14 0.11
 -4 28 2 0.03 0.03
 4 -28 -2 0.08 0.04
 -4 28 1 0.02 0.03
 4 28 -1 0.04 0.03
 4 -28 -1 0.03 0.04
 4 28 0 0.16 0.12
 4 -28 0 0.01 0.04
 4 28 1 0.28 0.13
 4 -28 1 0.21 0.12
 4 28 2 0.05 0.03
 4 -28 2 0.18 0.11
 4 28 3 -0.02 0.03
 4 -28 3 0.02 0.04
 4 -29 -6 0.22 0.12
 -4 29 5 0.39 0.14
 4 -29 -5 0.25 0.12
 -4 29 4 1.04 0.15
 4 -29 -4 0.82 0.14
 4 29 -3 0.03 0.03
 -4 29 3 0.04 0.03
 4 -29 -3 0.18 0.11
 -4 29 2 0.02 0.03
 4 29 -2 0.16 0.11
 4 -29 -2 -0.03 0.04
 -4 29 1 0.41 0.11
 4 29 -1 0.47 0.12
 4 -29 -1 0.54 0.12
 4 29 0 0.01 0.03
 -4 29 0 0.02 0.02
 4 -29 0 0.04 0.04
 4 -29 1 0.21 0.11
 4 29 2 0.02 0.03
 4 -29 2 0.04 0.04
 4 -29 3 0.31 0.13
 -4 30 5 0 0.03
 4 -30 -5 0.03 0.05
 4 -30 -4 0.16 0.11
 -4 30 3 0.03 0.03
 4 -30 -3 0.02 0.04
 -4 30 2 0 0.02
 4 30 -2 0.01 0.03
 4 -30 -2 0 0.04
 4 30 -1 0.01 0.03
 -4 30 1 0.04 0.03
 4 -30 -1 0.19 0.11
 4 30 0 0.05 0.03
 -4 30 0 0.19 0.11
 4 -30 0 0.17 0.11
 4 -30 1 0.28 0.12
 4 30 2 -0.02 0.03
 4 -30 2 0.06 0.05
 -4 31 4 -0.03 0.03
 4 -31 -4 0.01 0.04
 -4 31 3 0.16 0.12
 4 -31 -3 0.06 0.05
 4 31 -2 0.07 0.03
 -4 31 2 0.04 0.03
 4 -31 -2 0.23 0.11
 -4 31 1 -0.02 0.02
 4 31 -1 -0.06 0.03
 4 -31 -1 0 0.04
 4 31 0 0 0.03
 4 -31 0 -0.03 0.04
 4 31 1 -0.04 0.03
 4 -31 1 0.03 0.04
 -4 32 3 0.02 0.03
 4 -32 -3 0.02 0.04
 -4 32 2 0.03 0.03
 4 32 -2 0 0.03
 4 -32 -2 0.05 0.04
 4 -32 -1 0.19 0.12
 4 32 0 0 0.03
 4 -32 0 0.05 0.04
 5 0 -12 0.27 0.14
 5 0 -12 0.26 0.15
 5 0 -11 0.07 0.06
 5 0 -11 0.16 0.11
 5 0 -10 0.38 0.13
 5 0 -10 0.63 0.11
 5 0 -9 0 0.04
 5 0 -9 0.01 0.03
 5 0 -8 0.29 0.09
 5 0 -8 0.48 0.09
 5 0 -7 0 0.03
 -5 0 7 0 0.01
 5 0 -7 0.15 0.06
 -5 0 6 5.21 0.33
 5 0 -6 5.07 0.32
 5 0 -6 5.2 0.35
 -5 0 5 0.08 0.04
 5 0 -5 0.08 0.05
 5 0 -5 0.11 0.04
 5 0 -4 5.21 0.3
 -5 0 4 4.83 0.31
 5 0 -4 4.86 0.33
 5 0 -3 0.07 0.03
 5 0 -3 0.06 0.04
 -5 0 2 3.83 0.25
 5 0 -2 3.8 0.24
 5 0 -2 3.97 0.26
 5 0 -1 0.05 0.03
 5 0 -1 0 0.02
 -5 0 1 0 0.01
 5 0 0 0.34 0.06
 -5 0 0 0.19 0.05
 5 0 0 0.29 0.04
 5 0 1 0.06 0.05
 5 0 2 6 0.41
 -5 0 -2 6.4 0.39
 5 0 2 6.16 0.38
 5 0 3 -0.03 0.02
 5 0 3 0 0.03
 -5 0 -3 -0.01 0.01
 -5 0 -4 2.47 0.17
 5 0 4 2.32 0.19
 5 0 4 2.37 0.18
 5 0 5 0 0.03
 5 0 5 0.01 0.03
 5 0 6 1.49 0.16
 5 0 6 1.53 0.15
 5 0 7 -0.02 0.03
 5 0 7 0.01 0.04
 5 0 8 0 0.04
 5 0 8 0.02 0.04
 5 1 -12 1.09 0.17
 5 1 -12 1.11 0.19
 5 -1 -12 1.3 0.19
 5 -1 -12 1.29 0.18
 5 1 -11 0.09 0.06
 5 1 -11 0.06 0.04
 5 -1 -11 0.02 0.05
 5 -1 -11 0.04 0.04
 5 1 -10 -0.01 0.05
 5 1 -10 0.03 0.04
 5 -1 -10 0.04 0.04
 5 -1 -10 -0.01 0.04
 5 1 -9 1.04 0.12
 5 1 -9 1 0.13
 5 -1 -9 0.79 0.11
 5 -1 -9 0.97 0.13
 5 1 -8 0.5 0.09
 -5 1 8 0.4 0.06
 5 1 -8 0.32 0.09
 5 -1 -8 0.42 0.08
 5 -1 -8 0.41 0.1
 5 1 -7 3.61 0.28
 -5 1 7 5.14 0.28
 5 1 -7 3.65 0.3
 -5 -1 7 3.8 0.27
 5 -1 -7 5.26 0.31
 -5 1 6 16.05 0.95
 5 1 -6 15.7 0.98
 5 1 -6 15.58 0.93
 5 -1 -6 15.89 0.98
 5 -1 -6 15.49 0.93
 -5 -1 6 16.36 0.95
 5 1 -5 8.21 0.46
 -5 1 5 6.29 0.44
 5 -1 -5 6.03 0.43
 -5 -1 5 8.15 0.44
 5 1 -4 7.89 0.53
 -5 1 4 8 0.51
 5 1 -4 8.48 0.5
 5 -1 -4 8.91 0.5
 5 -1 -4 8.5 0.53
 -5 -1 4 8.59 0.52
 5 1 -3 19.74 1.34
 -5 1 3 23.66 1.32
 5 1 -3 19.49 1.26
 5 -1 -3 25.05 1.35
 -5 -1 3 19.66 1.31
 5 -1 -3 24.76 1.27
 5 1 -2 20.49 1.17
 5 1 -2 19.94 1.24
 -5 1 2 20.14 1.22
 -5 -1 2 20.94 1.22
 5 -1 -2 20.59 1.18
 -5 1 1 23.74 1.54
 5 1 -1 30.48 1.49
 5 -1 -1 23.91 1.49
 5 -1 -1 22.61 1.57
 -5 -1 1 28.62 1.54
 5 1 0 10.28 0.6
 -5 1 0 10.6 0.62
 5 1 0 10.05 0.64
 -5 -1 0 10.12 0.62
 5 -1 0 10.29 0.64
 5 -1 0 10 0.6
 5 1 1 2.18 0.15
 -5 1 -1 2.63 0.16
 5 1 1 1.84 0.17
 -5 -1 -1 1.95 0.16
 5 -1 1 2.69 0.18
 5 -1 1 2.68 0.16
 5 1 2 2.4 0.19
 5 1 2 2.67 0.18
 -5 1 -2 2.58 0.18
 5 -1 2 2.51 0.19
 5 -1 2 2.69 0.18
 -5 -1 -2 2.73 0.18
 5 1 3 0.35 0.07
 -5 1 -3 0.21 0.06
 5 1 3 0.37 0.06
 5 -1 3 0.35 0.07
 -5 -1 -3 0.33 0.06
 5 -1 3 0.27 0.07
 -5 1 -4 0.01 0.01
 5 1 4 0.01 0.03
 5 1 4 -0.02 0.02
 5 -1 4 -0.03 0.02
 5 -1 4 0.01 0.02
 -5 -1 -4 -0.01 0.01
 5 1 5 0.06 0.03
 5 1 5 0.04 0.03
 5 -1 5 0.01 0.03
 5 -1 5 0.03 0.03
 5 1 6 0 0.03
 5 1 6 0.03 0.04
 5 -1 6 0.02 0.04
 5 -1 6 0.03 0.03
 5 1 7 0.03 0.04
 5 1 7 0.04 0.04
 5 -1 7 0.04 0.04
 5 -1 7 0.19 0.09
 5 1 8 0.01 0.04
 5 1 8 0.25 0.12
 5 -1 8 0.05 0.04
 5 -1 8 0.03 0.04
 5 2 -12 0.33 0.16
 5 -2 -12 0.7 0.16
 5 -2 -12 0.45 0.15
 5 2 -11 0.01 0.06
 5 2 -11 0.03 0.04
 5 -2 -11 0.11 0.06
 5 -2 -11 0.08 0.05
 5 2 -10 -0.04 0.05
 5 2 -10 -0.01 0.03
 5 -2 -10 0.15 0.11
 5 -2 -10 0.01 0.04
 5 2 -9 0.01 0.03
 5 2 -9 0.02 0.04
 5 -2 -9 0 0.04
 5 -2 -9 0.03 0.03
 -5 2 8 0.43 0.06
 5 2 -8 0.44 0.09
 5 2 -8 0.35 0.08
 5 -2 -8 0.32 0.09
 5 -2 -8 0.39 0.09
 -5 2 7 11.62 0.7
 5 2 -7 12.04 0.69
 5 2 -7 11.08 0.73
 -5 -2 7 11.73 0.7
 5 -2 -7 11.11 0.73
 5 -2 -7 11.73 0.69
 -5 2 6 1.16 0.1
 5 -2 -6 1.35 0.11
 5 -2 -6 1.3 0.12
 -5 2 5 3.14 0.21
 5 2 -5 2.95 0.22
 5 2 -5 3.26 0.2
 5 -2 -5 3.31 0.21
 -5 -2 5 3.3 0.21
 5 -2 -5 3.08 0.22
 -5 2 4 0.61 0.07
 5 2 -4 0.67 0.06
 5 2 -4 0.68 0.08
 -5 -2 4 0.6 0.07
 5 -2 -4 0.69 0.08
 5 -2 -4 0.64 0.06
 5 2 -3 0.97 0.09
 -5 2 3 0.88 0.08
 5 2 -3 0.92 0.07
 5 -2 -3 0.98 0.09
 -5 -2 3 0.8 0.08
 5 -2 -3 0.89 0.08
 -5 2 2 3.57 0.24
 5 2 -2 3.66 0.24
 5 2 -2 3.85 0.22
 5 -2 -2 3.4 0.24
 -5 -2 2 3.64 0.24
 5 -2 -2 3.52 0.22
 -5 2 1 5.05 0.33
 5 2 -1 5.14 0.31
 5 2 -1 5.14 0.34
 -5 -2 1 5.2 0.33
 5 -2 -1 5.25 0.34
 5 -2 -1 5.2 0.31
 -5 2 0 1.71 0.13
 5 2 0 1.81 0.14
 5 2 0 1.86 0.12
 5 -2 0 1.64 0.14
 -5 -2 0 1.81 0.13
 5 -2 0 1.78 0.12
 5 2 1 0.09 0.04
 5 2 1 0.07 0.05
 -5 2 -1 0.02 0.01
 -5 -2 -1 0.05 0.04
 5 -2 1 0 0.02
 5 -2 1 0.01 0.01
 5 2 2 2.78 0.19
 -5 2 -2 2.78 0.19
 5 2 2 2.69 0.2
 5 -2 2 2.87 0.19
 -5 -2 -2 2.88 0.19
 5 -2 2 2.83 0.21
 5 2 3 0.58 0.09
 5 2 3 0.67 0.08
 -5 2 -3 0.68 0.08
 5 -2 3 0.68 0.08
 -5 -2 -3 0.68 0.08
 5 -2 3 0.6 0.09
 5 2 4 3.16 0.2
 -5 2 -4 2.46 0.19
 5 2 4 3.14 0.22
 5 -2 4 2.2 0.21
 -5 -2 -4 3.18 0.2
 5 -2 4 2.58 0.2
 5 2 5 0.73 0.11
 5 2 5 0.7 0.1
 5 -2 5 0.73 0.11
 5 -2 5 0.64 0.1
 5 2 6 0.2 0.09
 5 2 6 0.04 0.04
 5 -2 6 0.15 0.09
 5 -2 6 0.18 0.09
 5 2 7 0.01 0.04
 5 2 7 0.02 0.04
 5 -2 7 0.14 0.1
 5 -2 7 0.05 0.05
 5 2 8 -0.02 0.04
 5 2 8 -0.01 0.04
 5 -2 8 -0.06 0.04
 5 -2 8 0.14 0.11
 5 3 -12 1.52 0.22
 5 3 -12 1.43 0.18
 5 -3 -12 1.51 0.19
 5 -3 -12 1.54 0.22
 5 3 -11 0.68 0.15
 5 3 -11 0.5 0.13
 5 -3 -11 0.55 0.14
 5 -3 -11 0.77 0.14
 5 3 -10 0.19 0.1
 5 3 -10 0.32 0.12
 5 -3 -10 0.29 0.11
 5 -3 -10 0.31 0.12
 5 3 -9 1.47 0.14
 5 3 -9 1.37 0.16
 5 -3 -9 1.17 0.13
 5 -3 -9 1.21 0.15
 5 3 -8 1.22 0.12
 5 3 -8 0.94 0.12
 -5 3 8 0.99 0.09
 5 -3 -8 1 0.11
 5 -3 -8 1.07 0.13
 -5 3 7 0.27 0.06
 5 3 -7 0.22 0.08
 5 3 -7 0.19 0.06
 5 -3 -7 0.34 0.08
 5 -3 -7 0.14 0.07
 -5 -3 7 0.17 0.05
 5 3 -6 8.26 0.56
 5 3 -6 9.43 0.53
 -5 3 6 9 0.54
 5 -3 -6 8.57 0.53
 -5 -3 6 9.06 0.54
 5 -3 -6 8.27 0.56
 -5 3 5 1.26 0.1
 5 -3 -5 1.23 0.1
 5 -3 -5 1.25 0.11
 5 3 -4 17.7 1
 -5 3 4 17.42 1.04
 5 3 -4 16.87 1.06
 5 -3 -4 17.03 1.06
 5 -3 -4 17.52 1.01
 -5 -3 4 17.44 1.04
 -5 3 3 5.01 0.33
 5 -3 -3 5.33 0.34
 5 -3 -3 5.4 0.32
 -5 3 2 20.15 1.19
 5 3 -2 19.66 1.22
 5 3 -2 20.01 1.15
 -5 -3 2 19.51 1.19
 5 -3 -2 20.18 1.16
 5 -3 -2 20.39 1.22
 5 3 -1 8.37 0.56
 -5 3 1 9.35 0.55
 5 3 -1 8.65 0.52
 -5 -3 1 8.4 0.55
 5 -3 -1 9.29 0.53
 5 -3 -1 9.42 0.56
 5 3 0 7.53 0.42
 -5 3 0 7.23 0.44
 5 3 0 6.76 0.45
 5 -3 0 6.84 0.45
 5 -3 0 7.06 0.43
 -5 -3 0 7.03 0.44
 5 3 1 4.33 0.32
 5 3 1 4.85 0.3
 -5 3 -1 5.08 0.31
 -5 -3 -1 4.8 0.31
 5 -3 1 5.05 0.33
 5 -3 1 5.13 0.3
 5 3 2 0.3 0.05
 5 3 2 0.26 0.06
 -5 3 -2 0.34 0.05
 5 -3 2 0.31 0.06
 -5 -3 -2 0.41 0.06
 5 -3 2 0.27 0.07
 5 3 3 1.37 0.13
 5 3 3 1.44 0.12
 -5 3 -3 1.66 0.12
 -5 -3 -3 1.73 0.13
 5 -3 3 1.53 0.14
 5 -3 3 1.49 0.13
 5 3 4 1.13 0.12
 5 3 4 1.16 0.12
 -5 3 -4 1.24 0.1
 -5 -3 -4 1.21 0.11
 5 -3 4 1.15 0.11
 5 -3 4 1.08 0.12
 5 3 5 1.18 0.14
 5 3 5 1.26 0.13
 5 -3 5 1.37 0.14
 5 -3 5 1.35 0.14
 -5 -3 -5 1.32 0.12
 5 3 6 0.32 0.09
 5 3 6 0.49 0.11
 5 -3 6 0.38 0.1
 5 -3 6 0.48 0.1
 5 3 7 0.06 0.04
 5 3 7 0.13 0.11
 5 -3 7 0.34 0.11
 5 -3 7 0.03 0.04
 5 3 8 0.26 0.11
 5 -3 8 0.08 0.05
 5 -3 8 0.33 0.13
 5 4 -12 0.32 0.13
 5 4 -12 0.22 0.15
 5 -4 -12 0.32 0.15
 5 4 -11 0.22 0.11
 5 4 -11 0.07 0.06
 5 -4 -11 0.21 0.14
 5 -4 -11 0.08 0.04
 5 4 -10 3.57 0.29
 5 4 -10 3.29 0.26
 5 -4 -10 3.69 0.28
 5 -4 -10 3.33 0.26
 -5 -4 10 3.2 0.24
 5 4 -9 0.54 0.12
 5 4 -9 0.6 0.1
 -5 -4 9 0.64 0.09
 5 -4 -9 0.33 0.09
 5 -4 -9 0.69 0.12
 5 4 -8 1.06 0.11
 -5 4 8 1.06 0.1
 5 4 -8 1.07 0.13
 5 -4 -8 1.14 0.12
 5 -4 -8 1.29 0.13
 5 4 -7 0.79 0.09
 -5 4 7 0.85 0.09
 5 4 -7 0.82 0.1
 5 -4 -7 0.75 0.09
 -5 -4 7 0.68 0.08
 5 -4 -7 0.72 0.1
 -5 4 6 1.08 0.1
 5 -4 -6 1.25 0.11
 5 -4 -6 1.21 0.12
 -5 4 5 5.16 0.32
 5 4 -5 5.08 0.31
 5 4 -5 4.72 0.33
 5 -4 -5 5.11 0.34
 5 -4 -5 5.2 0.32
 -5 -4 5 5.19 0.32
 5 4 -4 2.61 0.19
 5 4 -4 2.78 0.17
 -5 4 4 2.34 0.18
 5 -4 -4 2.92 0.18
 -5 -4 4 2.53 0.18
 5 4 -3 40.96 2.32
 -5 4 3 40.54 2.4
 5 4 -3 40.55 2.45
 -5 -4 3 39.62 2.4
 5 -4 -3 41.49 2.33
 5 -4 -3 40.36 2.45
 5 4 -2 2.24 0.17
 5 4 -2 2.37 0.14
 -5 -4 2 2.37 0.16
 5 4 -1 1.07 0.07
 -5 4 1 1.01 0.09
 5 4 -1 1.04 0.09
 5 -4 -1 0.98 0.09
 5 -4 -1 1.06 0.09
 -5 -4 1 1.05 0.09
 -5 4 0 0.23 0.05
 5 4 0 0.12 0.04
 5 -4 0 0.27 0.05
 5 -4 0 0.31 0.06
 -5 -4 0 0.07 0.04
 5 4 1 0.5 0.05
 -5 4 -1 0.42 0.06
 5 4 1 0.41 0.06
 5 -4 1 0.52 0.06
 5 -4 1 0.23 0.06
 -5 -4 -1 0.37 0.06
 -5 4 -2 3.33 0.23
 5 4 2 4.07 0.25
 5 -4 2 3.18 0.23
 -5 -4 -2 4.18 0.24
 5 -4 2 3.14 0.25
 -5 4 -3 0.2 0.05
 5 4 3 0.17 0.06
 5 4 3 0.23 0.07
 5 -4 3 0.33 0.07
 -5 -4 -3 0.21 0.06
 5 -4 3 0.19 0.07
 5 4 4 2.32 0.2
 5 4 4 2.75 0.19
 5 -4 4 2.76 0.21
 -5 -4 -4 2.5 0.19
 5 -4 4 2.76 0.2
 5 4 5 0.13 0.08
 5 4 5 0.11 0.08
 5 -4 5 0.21 0.09
 -5 -4 -5 0.19 0.07
 5 -4 5 0.14 0.08
 5 4 6 0.56 0.1
 5 4 6 0.35 0.1
 5 -4 6 0.62 0.11
 5 -4 6 0.51 0.11
 5 4 7 0.01 0.04
 5 4 7 0 0.04
 5 -4 7 0.04 0.04
 5 -4 7 0.03 0.04
 5 4 8 0.4 0.12
 5 -4 8 0.46 0.13
 5 -4 8 0.46 0.12
 5 5 -12 0.42 0.14
 5 5 -12 0.61 0.18
 5 -5 -12 0.53 0.17
 5 -5 -12 0.39 0.14
 5 5 -11 1.07 0.19
 5 5 -11 1.14 0.15
 5 -5 -11 1.64 0.18
 -5 -5 11 1.2 0.14
 5 -5 -11 1.39 0.16
 5 5 -10 -0.01 0.05
 5 -5 -10 0.22 0.11
 -5 -5 10 0.14 0.08
 5 -5 -10 0.18 0.1
 5 5 -9 1.51 0.14
 5 5 -9 1.44 0.16
 -5 -5 9 1.44 0.13
 5 -5 -9 1.36 0.15
 5 -5 -9 1.68 0.17
 5 5 -8 0.96 0.11
 -5 5 8 0.94 0.1
 5 5 -8 1 0.13
 5 -5 -8 1.11 0.12
 5 -5 -8 1.04 0.11
 -5 -5 8 1.03 0.1
 5 5 -7 20.37 1.08
 5 5 -7 18.63 1.14
 -5 5 7 17.57 1.11
 5 -5 -7 17.4 1.14
 5 -5 -7 16.6 1.08
 -5 -5 7 19.92 1.1
 5 5 -6 2.79 0.22
 5 5 -6 3.28 0.2
 -5 5 6 2.83 0.21
 5 -5 -6 3.03 0.22
 5 -5 -6 3.01 0.21
 -5 -5 6 3.05 0.2
 5 5 -5 3.91 0.24
 -5 5 5 2.91 0.22
 5 -5 -5 2.94 0.22
 -5 -5 5 4.14 0.22
 5 -5 -5 2.86 0.23
 5 5 -4 0.15 0.03
 5 5 -4 0.15 0.06
 -5 5 4 0.13 0.04
 -5 -5 4 0.09 0.04
 5 -5 -4 0.09 0.04
 5 -5 -4 0.09 0.05
 5 5 -3 17.37 0.98
 -5 5 3 17.24 1.03
 5 5 -3 16.68 1.04
 5 -5 -3 16.96 1.05
 -5 -5 3 16.87 1.02
 5 -5 -3 17.41 1
 5 5 -2 0.86 0.08
 -5 5 2 0.77 0.08
 5 5 -2 0.81 0.05
 5 -5 -2 0.74 0.07
 -5 -5 2 0.81 0.08
 5 -5 -2 0.8 0.08
 -5 5 1 0.12 0.04
 5 -5 -1 0.12 0.05
 5 -5 -1 0.08 0.04
 5 5 0 2.64 0.16
 -5 5 0 2.58 0.18
 5 5 0 2.57 0.18
 5 -5 0 2.44 0.17
 -5 -5 0 2.51 0.18
 5 -5 0 2.42 0.18
 5 5 1 8.69 0.51
 -5 5 -1 6.52 0.49
 5 5 1 8.6 0.5
 5 5 1 9.14 0.47
 5 -5 1 6.55 0.48
 -5 -5 -1 8.41 0.5
 5 5 2 3.85 0.24
 5 5 2 3.93 0.26
 -5 5 -2 4.07 0.25
 5 5 2 3.63 0.26
 -5 -5 -2 3.88 0.26
 5 -5 2 3.85 0.27
 5 -5 2 3.68 0.25
 5 5 3 0.06 0.03
 -5 5 -3 0.01 0.01
 5 5 3 0.13 0.05
 5 5 3 0.07 0.06
 5 -5 3 0.03 0.02
 5 -5 3 0.04 0.03
 -5 -5 -3 0.1 0.05
 5 5 4 0.67 0.08
 5 5 4 0.42 0.08
 5 5 4 0.5 0.09
 5 -5 4 0.67 0.09
 -5 -5 -4 0.6 0.08
 5 -5 4 0.53 0.09
 5 5 5 1.29 0.13
 5 5 5 1.39 0.12
 5 -5 5 0.94 0.13
 -5 -5 -5 1.25 0.11
 5 -5 5 0.88 0.12
 5 5 6 0.07 0.04
 5 5 6 0.04 0.04
 5 -5 6 0.05 0.04
 5 -5 6 0.21 0.1
 5 5 7 0.04 0.04
 5 5 7 0.03 0.04
 5 -5 7 0.17 0.11
 5 -5 7 0.05 0.04
 5 5 8 0.1 0.04
 5 -5 8 -0.02 0.04
 5 -5 8 0.02 0.04
 -5 -5 -8 -0.02 0.05
 5 6 -12 0.52 0.16
 5 6 -12 0.72 0.14
 5 -6 -12 0.3 0.14
 5 -6 -12 0.31 0.14
 -5 -6 12 0.4 0.12
 5 6 -11 0.21 0.11
 5 6 -11 0.18 0.13
 5 -6 -11 0.03 0.04
 -5 -6 11 0.04 0.03
 5 -6 -11 0.04 0.06
 5 6 -10 0.73 0.12
 5 6 -10 0.99 0.16
 5 -6 -10 0.89 0.13
 -5 -6 10 0.86 0.12
 5 -6 -10 0.99 0.15
 5 6 -9 1 0.12
 5 6 -9 0.98 0.14
 -5 -6 9 0.88 0.1
 5 -6 -9 0.89 0.12
 5 -6 -9 1 0.14
 -5 6 8 4.42 0.3
 5 6 -8 4.23 0.32
 5 6 -8 4.38 0.3
 5 -6 -8 4.94 0.32
 5 -6 -8 4.47 0.3
 -5 -6 8 4.46 0.29
 5 6 -7 0.3 0.08
 5 6 -7 0.2 0.07
 5 -6 -7 0.24 0.07
 -5 -6 7 0.1 0.05
 -5 6 6 0.99 0.11
 5 6 -6 1.51 0.13
 5 -6 -6 1.18 0.12
 -5 -6 6 1.59 0.11
 5 -6 -6 1.02 0.11
 5 6 -5 10.95 0.6
 5 6 -5 10.21 0.64
 -5 6 5 10.11 0.63
 5 -6 -5 9.82 0.61
 5 -6 -5 10.09 0.64
 -5 -6 5 10.07 0.62
 5 6 -4 15.58 0.85
 5 -6 -4 12.07 0.81
 5 -6 -4 11.88 0.84
 -5 -6 4 15.34 0.83
 -5 6 3 9.54 0.57
 5 6 -3 9.03 0.53
 5 6 -3 9.26 0.57
 5 -6 -3 8.84 0.58
 -5 -6 3 9.33 0.56
 5 -6 -3 9.1 0.55
 5 6 -2 18.25 1.02
 -5 6 2 16.21 1
 5 -6 -2 15.4 0.97
 -5 -6 2 18.07 1.01
 5 -6 -2 15.61 1.02
 5 6 -1 2.54 0.15
 5 6 -1 2.59 0.18
 -5 6 1 2.37 0.17
 5 -6 -1 2.58 0.18
 -5 -6 1 2.42 0.17
 5 -6 -1 2.33 0.17
 -5 6 0 2.02 0.15
 5 6 0 2.37 0.16
 5 6 0 2.25 0.16
 5 6 0 2.24 0.13
 5 -6 0 1.99 0.16
 5 -6 0 2.13 0.15
 -5 -6 0 2.11 0.16
 5 6 1 2.36 0.16
 -5 6 -1 2.63 0.17
 5 6 1 2.42 0.18
 5 6 1 2.49 0.18
 5 -6 1 2.46 0.17
 5 -6 1 2.4 0.18
 -5 -6 -1 2.41 0.18
 -5 6 -2 1.97 0.14
 5 6 2 1.91 0.15
 5 6 2 1.72 0.15
 5 6 2 1.96 0.13
 5 -6 2 1.88 0.16
 5 -6 2 1.95 0.15
 -5 -6 -2 1.89 0.15
 5 6 3 0.2 0.06
 5 6 3 0.07 0.05
 -5 6 -3 0.1 0.05
 5 6 3 0.08 0.05
 5 -6 3 0.16 0.06
 -5 -6 -3 0.08 0.06
 5 -6 3 0.04 0.03
 5 6 4 1.78 0.15
 5 6 4 1.78 0.15
 5 6 4 1.71 0.14
 5 -6 4 1.84 0.16
 5 -6 4 1.76 0.15
 -5 -6 -4 1.57 0.14
 5 6 5 0.14 0.07
 5 6 5 0.13 0.07
 5 6 5 0.25 0.07
 5 -6 5 0.08 0.04
 -5 -6 -5 0.19 0.07
 5 -6 5 0.25 0.09
 5 -6 6 0.27 0.1
 5 -6 6 0.24 0.1
 5 6 7 0.06 0.04
 5 6 7 0.21 0.09
 5 -6 7 0.05 0.05
 5 -6 7 0.03 0.04
 5 6 8 0.37 0.11
 5 -6 8 0.5 0.13
 -5 -6 -8 0.23 0.14
 5 -6 8 0.27 0.12
 5 7 -12 0.74 0.14
 5 7 -12 0.73 0.17
 -5 -7 12 0.65 0.13
 5 -7 -12 0.44 0.15
 5 -7 -12 0.55 0.15
 5 7 -11 0.08 0.04
 5 7 -11 0.08 0.06
 5 -7 -11 0.18 0.11
 5 -7 -11 0.46 0.13
 -5 -7 11 0.06 0.04
 5 7 -10 0.29 0.1
 5 7 -10 0.38 0.12
 -5 -7 10 0.31 0.09
 5 -7 -10 0.34 0.11
 5 -7 -10 0.32 0.1
 5 7 -9 0.31 0.11
 5 7 -9 0.49 0.09
 5 -7 -9 0.4 0.1
 -5 -7 9 0.67 0.09
 5 -7 -9 0.32 0.1
 -5 7 8 1.31 0.12
 5 7 -8 1.4 0.15
 5 7 -8 1.56 0.13
 5 -7 -8 1.54 0.15
 5 -7 -8 1.39 0.14
 -5 -7 8 1.35 0.12
 5 7 -7 2.55 0.18
 5 7 -7 2.6 0.2
 -5 -7 7 2.61 0.18
 5 7 -6 8.91 0.59
 5 7 -6 9.56 0.55
 -5 7 6 9.04 0.58
 -5 -7 6 9.87 0.57
 5 -7 -6 9.23 0.6
 5 -7 -6 9.27 0.57
 -5 7 5 0.14 0.05
 5 7 -5 0.02 0.02
 5 7 -5 0.08 0.04
 5 -7 -5 0 0.02
 5 -7 -5 0.1 0.06
 -5 7 4 0.29 0.06
 5 7 -4 0.37 0.06
 5 7 -4 0.27 0.03
 5 -7 -4 0.33 0.06
 -5 -7 4 0.3 0.05
 5 -7 -4 0.29 0.06
 -5 7 3 1.23 0.1
 5 7 -3 1.04 0.1
 5 -7 -3 1.31 0.1
 -5 -7 3 1.01 0.1
 5 -7 -3 1.52 0.11
 5 7 -2 4.19 0.27
 -5 7 2 4.08 0.27
 -5 -7 2 4 0.27
 5 -7 -2 4.07 0.26
 5 -7 -2 4.11 0.28
 5 7 -1 1.33 0.1
 5 7 -1 1.05 0.1
 -5 7 1 0.84 0.09
 5 -7 -1 1.05 0.09
 5 -7 -1 1.04 0.1
 -5 7 0 8.72 0.54
 5 7 0 8.94 0.51
 5 7 0 9.25 0.56
 5 7 0 8.74 0.55
 5 -7 0 8.74 0.53
 5 -7 0 8.66 0.56
 -5 -7 0 8.95 0.55
 5 7 1 12.91 0.82
 5 7 1 13.31 0.82
 -5 7 -1 14.26 0.81
 5 7 1 13.24 0.77
 5 -7 1 12.9 0.79
 5 7 2 0.01 0.02
 -5 7 -2 0.01 0.01
 5 7 2 0 0.02
 5 7 2 -0.01 0.01
 5 -7 2 0.01 0.03
 5 -7 2 0 0.02
 5 7 3 0.22 0.06
 5 7 3 0.14 0.06
 5 7 3 0.16 0.06
 5 7 4 1.43 0.13
 5 7 4 1.44 0.12
 5 7 4 1.59 0.14
 5 -7 4 1.34 0.14
 5 -7 4 1.48 0.14
 5 7 5 0.09 0.07
 5 7 5 0.22 0.07
 5 7 5 0.21 0.07
 -5 -7 -5 0.24 0.07
 5 -7 5 0.22 0.09
 5 -7 5 0.27 0.08
 5 7 6 0.46 0.1
 5 7 6 0.49 0.1
 5 -7 6 0.75 0.12
 5 -7 6 0.55 0.11
 5 7 7 0.27 0.1
 5 7 7 0.06 0.04
 5 -7 7 0.09 0.05
 5 -7 7 0.07 0.04
 5 7 8 0.17 0.1
 5 -7 8 0.22 0.12
 5 -7 8 0.34 0.12
 -5 -7 -8 0.2 0.13
 5 8 -12 0.71 0.17
 5 -8 -12 0.89 0.16
 5 -8 -12 0.73 0.15
 5 8 -11 0.04 0.06
 5 8 -11 0.02 0.04
 -5 -8 11 0.07 0.04
 5 -8 -11 0.06 0.05
 5 -8 -11 -0.01 0.04
 5 8 -10 0.19 0.12
 5 8 -10 0.11 0.09
 5 -8 -10 0.29 0.11
 5 -8 -10 0.19 0.1
 -5 -8 10 0.17 0.08
 -5 8 9 1.08 0.11
 5 8 -9 1.27 0.16
 5 -8 -9 1.02 0.13
 5 -8 -9 1.2 0.14
 -5 -8 9 1.13 0.11
 -5 8 8 0 0.01
 5 8 -8 0.04 0.04
 -5 -8 8 0.1 0.05
 5 -8 -8 0.13 0.08
 5 -8 -8 -0.01 0.03
 -5 8 7 11.62 0.75
 5 8 -7 13.01 0.73
 5 8 -7 11.82 0.78
 -5 -8 7 13.27 0.73
 5 -8 -7 12.2 0.75
 5 -8 -7 11.94 0.78
 5 8 -6 2.32 0.15
 5 8 -6 2.36 0.17
 -5 8 6 1.82 0.16
 5 -8 -6 1.95 0.16
 5 -8 -6 2.38 0.18
 -5 -8 6 2.02 0.15
 -5 8 5 0.8 0.09
 5 8 -5 0.78 0.07
 5 8 -5 0.77 0.09
 5 -8 -5 0.71 0.09
 5 -8 -5 0.79 0.09
 -5 -8 5 0.79 0.08
 5 8 -4 0.16 0.05
 5 -8 -4 0.09 0.05
 5 -8 -4 0.12 0.05
 -5 -8 4 0.07 0.04
 -5 8 3 10.67 0.67
 5 8 -3 10.86 0.68
 5 -8 -3 10.62 0.65
 5 -8 -3 11.22 0.68
 -5 -8 3 11.29 0.67
 5 -8 -2 2.22 0.16
 5 -8 -2 2.25 0.17
 5 8 -1 12.01 0.72
 -5 8 1 11.87 0.71
 5 8 -1 11.92 0.72
 5 -8 -1 11.64 0.73
 5 -8 -1 11.22 0.69
 -5 -8 1 11.54 0.71
 5 8 0 1.07 0.08
 5 8 0 1.22 0.1
 5 8 0 1.23 0.11
 -5 8 -1 3.96 0.26
 5 8 1 4.03 0.24
 5 8 1 3.95 0.27
 5 8 1 3.97 0.26
 5 -8 1 3.9 0.26
 5 -8 1 4.02 0.28
 5 8 2 1.24 0.1
 5 8 2 1.1 0.11
 -5 8 -2 0.96 0.09
 5 8 2 1.23 0.09
 5 -8 2 0.92 0.11
 5 -8 2 0.88 0.1
 -5 8 -3 0.02 0.01
 5 8 3 0.01 0.02
 5 8 3 0.01 0.02
 5 8 3 0.01 0.02
 5 -8 3 0.03 0.03
 5 -8 3 0.01 0.03
 5 8 4 0.81 0.1
 5 8 4 0.8 0.09
 5 8 4 0.67 0.09
 5 -8 4 0.74 0.1
 5 -8 4 0.69 0.1
 5 8 5 0.05 0.03
 5 8 5 0.13 0.07
 5 8 5 0.02 0.03
 5 -8 5 -0.01 0.03
 5 -8 5 0.03 0.03
 5 8 6 0.14 0.09
 5 8 6 0.26 0.08
 5 -8 6 0.28 0.1
 5 -8 6 0.32 0.11
 5 8 7 0.14 0.09
 5 8 7 0.04 0.03
 5 -8 7 0.22 0.11
 5 -8 7 0.14 0.11
 5 8 8 0.24 0.11
 5 -8 8 0.25 0.12
 5 -8 8 0.12 0.06
 -5 -8 -8 0.27 0.13
 5 9 -11 0.34 0.14
 5 -9 -11 0.44 0.13
 5 -9 -11 0.37 0.12
 5 9 -10 0.03 0.05
 5 -9 -10 0 0.04
 5 -9 -10 0.02 0.04
 -5 -9 10 0.02 0.03
 -5 9 9 0.08 0.06
 5 9 -9 0.01 0.04
 -5 -9 9 0.02 0.02
 5 -9 -9 0.04 0.03
 5 -9 -9 0 0.04
 5 9 -8 2.71 0.22
 -5 9 8 2.6 0.19
 -5 -9 8 2.46 0.18
 5 -9 -8 2.26 0.2
 5 -9 -8 2.67 0.21
 5 9 -7 2.55 0.19
 -5 9 7 2.09 0.17
 5 -9 -7 2.1 0.18
 -5 -9 7 2.75 0.16
 5 -9 -7 1.88 0.18
 5 9 -6 4.41 0.32
 -5 9 6 4.62 0.31
 5 9 -6 4.89 0.29
 -5 -9 6 4.88 0.29
 -5 -9 6 4.88 0.3
 5 -9 -6 4.6 0.31
 5 -9 -6 4.51 0.32
 -5 9 5 3.16 0.22
 5 -9 -5 3.05 0.22
 5 -9 -5 3.42 0.23
 -5 9 4 16.79 1.06
 5 9 -4 17.42 1.08
 5 -9 -4 18.29 1.09
 -5 -9 4 18.11 1.06
 5 -9 -4 17.71 1.04
 -5 9 3 1.01 0.09
 5 9 -3 0.8 0.09
 -5 -9 3 0.96 0.09
 5 -9 -3 1.01 0.1
 5 -9 -3 1.02 0.09
 5 9 -2 1.46 0.11
 -5 9 2 1.35 0.12
 5 9 -2 1.45 0.12
 5 -9 -2 1.44 0.12
 -5 -9 2 1.43 0.12
 5 -9 -2 1.58 0.12
 -5 9 1 1.09 0.1
 5 -9 -1 1.17 0.1
 5 -9 -1 1.16 0.1
 5 9 0 0.02 0.01
 5 9 0 0.04 0.02
 -5 9 0 0.07 0.04
 5 -9 0 0.18 0.06
 5 -9 0 0.02 0.02
 5 9 1 0.53 0.08
 -5 9 -1 0.46 0.06
 5 9 1 0.68 0.07
 5 -9 1 0.45 0.08
 5 -9 1 0.59 0.08
 -5 9 -2 9.71 0.57
 5 9 2 9.13 0.58
 5 9 2 8.88 0.58
 5 9 2 9.5 0.55
 5 -9 2 9.24 0.6
 5 -9 2 9.18 0.57
 5 9 3 0.71 0.09
 -5 9 -3 0.31 0.06
 5 -9 3 0.47 0.08
 5 -9 3 0.34 0.08
 5 9 4 0 0.02
 5 9 4 0.01 0.02
 5 9 4 0.01 0.02
 5 -9 4 0.01 0.03
 5 -9 4 0.15 0.07
 5 9 5 0.31 0.08
 5 9 5 0.48 0.08
 5 9 5 0.38 0.08
 5 -9 5 0.46 0.09
 5 -9 5 0.21 0.1
 5 9 6 0.16 0.08
 5 9 6 0.11 0.08
 5 -9 6 0.02 0.04
 5 -9 6 0.05 0.04
 5 -9 7 0.02 0.04
 5 -9 7 0 0.05
 5 -9 8 -0.05 0.04
 5 -9 8 0 0.04
 5 10 -11 0.17 0.13
 5 -10 -11 0.31 0.13
 5 -10 -11 0.2 0.12
 5 10 -10 0.22 0.12
 5 -10 -10 0.07 0.05
 5 -10 -10 0.15 0.1
 5 10 -9 0.34 0.11
 -5 10 9 0.26 0.07
 5 -10 -9 0.13 0.09
 5 -10 -9 0.18 0.1
 5 10 -8 3.92 0.31
 -5 10 8 4.52 0.29
 5 -10 -8 4.64 0.3
 -5 -10 8 3.81 0.28
 5 -10 -8 4.52 0.31
 5 10 -7 0.22 0.08
 -5 10 7 0.12 0.07
 5 -10 -7 0.12 0.07
 5 -10 -7 0.11 0.08
 5 10 -6 0.2 0.07
 -5 10 6 0.21 0.07
 5 -10 -6 0.24 0.07
 5 -10 -6 0.12 0.07
 -5 -10 6 0.09 0.05
 5 10 -5 16.43 1.01
 -5 10 5 16.03 0.99
 -5 -10 5 16.78 0.98
 5 -10 -5 16.71 1.01
 5 -10 -5 15.74 0.97
 5 10 -4 3.57 0.21
 -5 10 4 2.5 0.2
 5 -10 -4 2.91 0.21
 -5 -10 4 2.88 0.2
 5 10 -3 3.22 0.21
 -5 10 3 3.03 0.21
 5 -10 -3 3 0.22
 -5 -10 3 3.14 0.21
 5 -10 -3 2.99 0.21
 5 10 -2 1.78 0.14
 5 10 -2 1.88 0.14
 -5 -10 2 1.87 0.14
 5 10 -1 18.78 1.13
 5 10 -1 18.63 1.14
 -5 10 1 19.1 1.12
 5 -10 -1 18.6 1.15
 5 -10 -1 18.28 1.1
 5 10 0 0.03 0.02
 -5 10 0 0.08 0.05
 5 10 0 0.13 0.05
 5 -10 0 0.11 0.05
 5 -10 0 0.08 0.06
 5 10 1 0.11 0.05
 5 10 1 0.01 0.01
 -5 10 -1 0 0.01
 5 -10 1 0.01 0.02
 5 -10 1 0.07 0.06
 -5 10 -2 5.13 0.35
 5 10 2 6.6 0.37
 5 -10 2 5.12 0.36
 5 -10 2 5.56 0.38
 5 10 3 8.5 0.54
 -5 10 -3 8.64 0.52
 5 10 3 8.29 0.54
 5 -10 3 8.58 0.53
 5 -10 3 8.66 0.56
 5 10 4 0.01 0.03
 5 -10 4 0.1 0.08
 5 -10 4 0.29 0.08
 5 10 5 0.23 0.08
 5 10 5 0.25 0.08
 5 -10 5 0.31 0.09
 5 -10 5 0.17 0.1
 5 -10 6 0.85 0.15
 5 -10 6 1.02 0.14
 5 -10 7 0.2 0.11
 5 -10 7 0.03 0.04
 5 -10 8 0.17 0.12
 5 -10 8 0.03 0.05
 5 11 -11 0.39 0.15
 5 -11 -11 0.18 0.11
 5 -11 -11 0.06 0.05
 5 11 -10 1.59 0.18
 5 -11 -10 1.13 0.15
 5 -11 -10 1.34 0.16
 -5 11 9 0.1 0.07
 5 11 -9 0.22 0.11
 5 -11 -9 0.06 0.04
 5 -11 -9 0.08 0.04
 -5 11 8 0.42 0.08
 5 11 -8 0.43 0.1
 5 -11 -8 0.32 0.09
 5 -11 -8 0.59 0.1
 -5 11 7 7.06 0.47
 5 11 -7 8.43 0.49
 5 -11 -7 6.91 0.47
 5 -11 -7 7.1 0.48
 -5 11 6 7.78 0.51
 5 11 -6 7.9 0.52
 -5 -11 6 8.76 0.5
 5 -11 -6 8.15 0.52
 5 -11 -6 7.77 0.5
 5 11 -5 0.69 0.08
 -5 11 5 0.41 0.07
 5 -11 -5 0.3 0.07
 -5 -11 5 0.61 0.07
 5 -11 -5 0.43 0.08
 -5 11 4 2.04 0.15
 5 11 -4 2.17 0.15
 5 -11 -4 1.85 0.15
 -5 -11 4 1.97 0.15
 5 -11 -4 1.91 0.15
 -5 11 3 2.39 0.18
 5 -11 -3 2.55 0.18
 5 -11 -3 2.45 0.18
 5 11 -2 3.26 0.22
 -5 11 2 3.27 0.22
 5 11 -2 3.37 0.23
 5 -11 -2 3.12 0.22
 5 -11 -2 3.15 0.23
 -5 11 1 3.3 0.23
 5 11 -1 3.66 0.24
 5 11 -1 3.77 0.23
 5 -11 -1 3.22 0.23
 5 -11 -1 3.39 0.24
 -5 11 0 6.53 0.41
 5 11 0 6.13 0.42
 5 11 0 6.79 0.41
 5 -11 0 6.59 0.43
 5 -11 0 6.67 0.41
 -5 11 -1 1.03 0.09
 5 -11 1 1 0.1
 5 -11 1 0.91 0.1
 5 11 2 0.7 0.08
 5 11 2 0.61 0.09
 -5 11 -2 0.61 0.07
 5 -11 2 0.7 0.09
 5 -11 2 0.69 0.1
 5 11 3 1.89 0.16
 5 11 3 2.14 0.15
 5 -11 3 1.84 0.16
 5 -11 3 1.76 0.16
 5 11 4 0.15 0.06
 5 11 4 0.2 0.08
 5 -11 4 0.18 0.08
 5 -11 4 0.15 0.08
 5 11 5 0 0.02
 5 -11 5 0.14 0.09
 5 -11 5 0.03 0.04
 5 -11 6 0.04 0.04
 5 -11 6 0.22 0.1
 5 -11 7 -0.01 0.04
 5 -11 7 -0.03 0.04
 5 12 -11 0.02 0.06
 5 -12 -11 0.01 0.05
 5 -12 -11 0.03 0.05
 5 12 -10 0.38 0.13
 5 -12 -10 0.51 0.12
 5 -12 -10 0.62 0.13
 5 12 -9 0.54 0.13
 -5 12 9 0.6 0.09
 5 -12 -9 0.73 0.11
 5 -12 -9 0.66 0.12
 -5 12 8 1.37 0.13
 5 12 -8 1.71 0.16
 5 -12 -8 1.25 0.14
 5 -12 -8 1.56 0.15
 -5 12 7 2.86 0.22
 5 12 -7 3.01 0.23
 5 -12 -7 3.08 0.23
 5 -12 -7 2.8 0.22
 -5 12 6 1.79 0.15
 5 -12 -6 1.72 0.15
 5 -12 -6 1.59 0.14
 5 12 -5 1.17 0.11
 -5 12 5 1.2 0.11
 -5 -12 5 1.19 0.1
 5 -12 -5 1.15 0.12
 5 -12 -5 1.23 0.12
 -5 12 4 2.61 0.18
 5 12 -4 2.3 0.18
 5 -12 -4 2.54 0.18
 -5 -12 4 2.16 0.17
 5 -12 -4 2.65 0.18
 -5 12 3 27.97 1.68
 5 12 -3 28.85 1.7
 5 12 -3 28.43 1.68
 5 -12 -3 28.31 1.71
 -5 -12 3 28 1.68
 5 -12 -3 27.36 1.64
 -5 12 2 1.21 0.11
 5 12 -2 1.76 0.13
 5 -12 -2 1.17 0.12
 5 -12 -2 1.35 0.12
 5 12 -1 0.15 0.06
 -5 12 1 0.27 0.06
 5 12 -1 0.24 0.05
 5 -12 -1 0.24 0.07
 5 -12 -1 0.21 0.06
 5 12 0 1.2 0.09
 5 -12 0 1.03 0.11
 5 -12 0 1.05 0.11
 5 12 1 13.76 0.83
 -5 12 -1 13.57 0.82
 5 12 1 13.02 0.83
 5 -12 1 13.48 0.81
 5 -12 1 13.97 0.85
 -5 12 -2 0.88 0.09
 5 12 2 1.02 0.09
 5 12 2 0.81 0.11
 5 -12 2 0.93 0.11
 5 -12 2 0.97 0.11
 5 12 3 0.27 0.08
 5 -12 3 0.27 0.08
 5 -12 3 0.31 0.08
 5 12 4 1.24 0.13
 5 -12 4 1.17 0.13
 5 -12 4 1 0.13
 5 12 5 0.52 0.1
 5 -12 5 0.54 0.11
 5 -12 5 0.56 0.11
 5 12 6 0.13 0.08
 5 -12 6 0.27 0.11
 5 -12 6 0 0.04
 5 -12 7 0.5 0.13
 5 -12 7 0.26 0.12
 5 13 -11 0.05 0.06
 5 -13 -11 0 0.05
 5 -13 -11 0.34 0.13
 5 13 -10 0.06 0.06
 5 -13 -10 0.02 0.04
 5 -13 -10 0.15 0.1
 5 13 -9 0.2 0.11
 -5 13 9 0.3 0.09
 5 -13 -9 0.25 0.1
 5 -13 -9 0.22 0.09
 5 13 -8 0 0.04
 5 -13 -8 0.19 0.09
 5 -13 -8 0.1 0.07
 -5 13 7 0.15 0.08
 5 13 -7 0.18 0.08
 5 -13 -7 0.02 0.03
 5 -13 -7 0.09 0.07
 -5 13 6 1.78 0.15
 5 13 -6 1.84 0.15
 5 -13 -6 1.69 0.15
 5 -13 -6 1.68 0.16
 5 13 -5 0.32 0.07
 -5 13 5 0.23 0.07
 5 -13 -5 0.29 0.07
 5 -13 -5 0.4 0.07
 -5 -13 5 0.46 0.07
 -5 13 4 0.32 0.07
 5 13 -4 0.42 0.07
 5 -13 -4 0.34 0.08
 5 -13 -4 0.36 0.07
 -5 -13 4 0.38 0.07
 5 13 -3 1.39 0.11
 5 13 -3 1.05 0.12
 5 -13 -3 1.33 0.12
 5 -13 -3 1.27 0.11
 5 13 -2 3.79 0.26
 5 13 -2 4.04 0.25
 -5 13 2 3.91 0.26
 5 -13 -2 3.69 0.26
 5 -13 -2 3.66 0.26
 -5 13 1 1.37 0.12
 5 13 -1 1.77 0.13
 5 -13 -1 1.27 0.13
 5 -13 -1 1.3 0.12
 5 13 0 0.56 0.08
 5 13 0 0.55 0.06
 -5 13 0 0.49 0.07
 5 -13 0 0.56 0.08
 5 -13 0 0.63 0.09
 5 13 1 5.05 0.33
 -5 13 -1 4.56 0.31
 5 -13 1 4.6 0.31
 5 -13 1 4.79 0.33
 -5 13 -2 1.9 0.14
 5 13 2 1.68 0.15
 5 -13 2 1.67 0.16
 5 -13 2 1.84 0.16
 5 13 3 2.81 0.19
 5 -13 3 1.95 0.18
 5 -13 3 2.07 0.19
 5 13 4 0.03 0.02
 5 -13 4 0 0.03
 5 -13 4 0 0.03
 5 13 5 0.56 0.1
 5 -13 5 0.61 0.12
 5 -13 5 0.41 0.12
 5 13 6 0.33 0.09
 5 -13 6 0.22 0.11
 5 -13 6 0.13 0.1
 5 -13 7 0.03 0.05
 5 -13 7 0.18 0.11
 5 14 -11 1 0.17
 5 -14 -11 0.94 0.15
 5 -14 -11 1.06 0.16
 5 14 -10 0.08 0.06
 5 -14 -10 0.01 0.04
 5 -14 -10 -0.02 0.04
 5 14 -9 0.1 0.05
 -5 14 9 0.04 0.02
 5 -14 -9 0.16 0.11
 5 -14 -9 0.14 0.09
 5 14 -8 1.02 0.12
 -5 14 8 0.64 0.1
 5 -14 -8 0.61 0.11
 5 -14 -8 0.65 0.1
 5 14 -7 0.82 0.11
 -5 14 7 0.79 0.11
 5 -14 -7 0.77 0.1
 5 -14 -7 0.6 0.1
 -5 14 6 0.73 0.1
 5 14 -6 0.49 0.09
 5 -14 -6 0.81 0.11
 5 -14 -6 0.86 0.1
 5 14 -5 0.59 0.08
 -5 14 5 0.63 0.09
 5 -14 -5 0.62 0.08
 -5 -14 5 0.55 0.08
 5 -14 -5 0.49 0.09
 -5 14 4 7.08 0.48
 5 14 -4 7.96 0.48
 5 14 -4 8.11 0.48
 5 -14 -4 7.3 0.49
 5 -14 -4 7.03 0.47
 -5 -14 4 8.19 0.48
 -5 14 3 0.58 0.09
 5 14 -3 0.67 0.09
 5 14 -3 0.68 0.07
 5 -14 -3 0.64 0.08
 5 -14 -3 0.6 0.08
 -5 14 2 0.36 0.06
 5 14 -2 0.28 0.05
 5 14 -2 0.18 0.07
 5 -14 -2 0.24 0.06
 5 -14 -2 0.23 0.07
 5 14 -1 2.84 0.21
 -5 14 1 3.04 0.21
 5 -14 -1 2.67 0.21
 5 -14 -1 3.06 0.21
 -5 14 0 0.16 0.06
 5 -14 0 0.23 0.07
 5 -14 0 0.18 0.06
 5 14 1 0.34 0.08
 -5 14 -1 0.54 0.07
 5 -14 1 0.47 0.08
 5 -14 1 0.51 0.08
 -5 14 -2 0.26 0.06
 5 14 2 0.27 0.08
 5 -14 2 0.21 0.08
 5 -14 2 0.15 0.07
 5 14 3 0.64 0.1
 5 -14 3 0.73 0.1
 5 -14 3 0.83 0.12
 5 14 4 0.25 0.09
 5 -14 4 0.2 0.1
 5 -14 4 0.21 0.09
 5 14 5 0.01 0.02
 5 -14 5 0 0.03
 5 -14 5 -0.01 0.04
 5 14 6 0.29 0.1
 5 -14 6 0.25 0.11
 5 -14 6 0.32 0.11
 5 -14 7 0.01 0.04
 5 -14 7 0.02 0.05
 5 15 -11 0.27 0.14
 5 -15 -11 0.17 0.12
 5 15 -10 0.17 0.11
 5 -15 -10 0.2 0.11
 5 -15 -10 0.06 0.05
 5 15 -9 0.14 0.11
 -5 15 9 0.04 0.02
 5 -15 -9 0.01 0.04
 5 -15 -9 0.01 0.04
 5 15 -8 0.22 0.09
 5 -15 -8 0.23 0.08
 5 -15 -8 0.16 0.1
 5 15 -7 7.97 0.5
 -5 15 7 7.32 0.49
 5 -15 -7 7.23 0.48
 5 -15 -7 7.46 0.49
 -5 15 6 2.35 0.19
 5 15 -6 2.43 0.19
 5 -15 -6 2.34 0.18
 5 -15 -6 2.19 0.19
 5 15 -5 0.43 0.07
 -5 15 5 0.38 0.08
 -5 -15 5 0.47 0.07
 5 -15 -5 0.41 0.09
 5 -15 -5 0.42 0.07
 5 15 -4 2.21 0.16
 -5 15 4 2 0.17
 5 15 -4 2.2 0.16
 5 -15 -4 2 0.16
 -5 -15 4 2.28 0.16
 5 -15 -4 1.9 0.17
 -5 15 3 2.82 0.22
 5 15 -3 3.39 0.22
 5 15 -3 3.31 0.21
 5 -15 -3 2.88 0.21
 5 -15 -3 2.6 0.21
 -5 15 2 0.86 0.09
 5 15 -2 0.57 0.09
 5 -15 -2 0.71 0.1
 5 -15 -2 0.74 0.09
 5 15 -1 0.25 0.07
 -5 15 1 0.27 0.07
 5 -15 -1 0.35 0.08
 5 -15 -1 0.24 0.06
 -5 15 0 0 0.01
 5 15 0 -0.02 0.01
 5 -15 0 0 0.03
 5 -15 0 0.02 0.02
 5 15 1 2.52 0.22
 -5 15 -1 3.08 0.21
 5 -15 1 3.34 0.23
 5 -15 1 3.23 0.23
 5 15 2 -0.01 0.02
 -5 15 -2 0 0.01
 5 -15 2 -0.01 0.03
 5 -15 2 0.14 0.08
 5 15 3 3 0.24
 5 -15 3 3.3 0.25
 5 -15 3 3.43 0.25
 5 15 4 0.37 0.1
 5 -15 4 0.26 0.1
 5 -15 4 0.34 0.1
 5 15 5 0.13 0.09
 5 -15 5 0.15 0.1
 5 -15 5 0.2 0.11
 5 15 6 0.02 0.02
 5 -15 6 0.03 0.04
 5 -15 6 0.07 0.05
 5 -15 7 0.05 0.05
 5 -15 7 0.18 0.12
 5 16 -10 -0.01 0.05
 5 -16 -10 -0.02 0.04
 5 16 -9 1.2 0.16
 -5 16 9 1.3 0.14
 5 -16 -9 1.34 0.16
 5 16 -8 1.53 0.16
 -5 16 8 1.83 0.17
 5 -16 -8 1.85 0.18
 5 -16 -8 1.72 0.16
 5 16 -7 0.28 0.09
 -5 16 7 0.35 0.09
 5 -16 -7 0.39 0.1
 5 -16 -7 0.48 0.09
 5 16 -6 1.93 0.15
 -5 16 6 1.71 0.16
 5 -16 -6 1.6 0.15
 5 -16 -6 1.66 0.16
 5 16 -5 0.27 0.06
 -5 16 5 0.14 0.07
 -5 -16 5 0.17 0.07
 5 -16 -5 0.27 0.08
 5 -16 -5 0.28 0.07
 -5 16 4 0.23 0.08
 5 16 -4 0.17 0.07
 5 -16 -4 0.24 0.07
 -5 -16 4 0.26 0.07
 5 -16 -4 0.13 0.07
 5 16 -3 0.47 0.08
 -5 16 3 0.48 0.08
 5 -16 -3 0.43 0.08
 5 -16 -3 0.43 0.07
 -5 16 2 0.19 0.07
 5 16 -2 0.2 0.07
 5 -16 -2 0.18 0.06
 5 -16 -2 0.12 0.07
 -5 16 1 2.18 0.17
 5 16 -1 2.19 0.17
 5 -16 -1 2.07 0.17
 5 -16 -1 2.01 0.17
 -5 16 0 0.22 0.06
 5 16 0 0.19 0.07
 5 -16 0 0.2 0.06
 5 -16 0 0.14 0.07
 -5 16 -1 0.13 0.06
 5 -16 1 0.22 0.08
 5 -16 1 0.19 0.07
 5 16 2 0.19 0.08
 -5 16 -2 0.11 0.06
 5 -16 2 0.09 0.07
 5 -16 2 0.26 0.09
 5 16 3 2.43 0.21
 5 -16 3 2.31 0.2
 5 -16 3 2.69 0.21
 5 16 4 1.98 0.2
 5 -16 4 2.33 0.2
 5 -16 4 2.39 0.21
 5 16 5 0.01 0.02
 5 -16 5 0 0.04
 5 -16 5 0 0.04
 5 16 6 0.56 0.12
 5 -16 6 0.49 0.13
 5 -16 6 0.51 0.13
 5 -16 7 0.05 0.05
 5 -16 7 -0.03 0.04
 5 17 -10 -0.02 0.04
 -5 17 10 0.03 0.02
 5 -17 -10 -0.05 0.04
 -5 17 9 0.21 0.1
 5 17 -9 0.29 0.1
 5 -17 -9 0.06 0.04
 5 17 -8 3.12 0.25
 -5 17 8 3.42 0.26
 5 -17 -8 3.54 0.27
 -5 17 7 0.59 0.1
 5 17 -7 0.31 0.09
 5 -17 -7 0.48 0.1
 5 -17 -7 0.4 0.08
 5 17 -6 0.32 0.09
 -5 17 6 0.27 0.09
 5 -17 -6 0.24 0.08
 5 -17 -6 0.29 0.09
 -5 17 5 7.42 0.5
 5 -17 -5 7.37 0.49
 -5 -17 5 8.42 0.48
 5 -17 -5 7.35 0.49
 -5 17 4 2.59 0.19
 5 17 -4 2.44 0.18
 5 -17 -4 2.25 0.19
 5 -17 -4 2.39 0.18
 5 17 -3 0.63 0.09
 -5 17 3 0.5 0.09
 5 -17 -3 0.41 0.09
 5 -17 -3 0.58 0.08
 5 17 -2 0.23 0.08
 -5 17 2 0.16 0.07
 5 -17 -2 0.19 0.07
 5 -17 -2 0.19 0.06
 -5 17 1 3.08 0.22
 5 -17 -1 3.17 0.23
 5 -17 -1 3 0.22
 -5 17 0 0.77 0.09
 5 17 0 0.68 0.1
 5 -17 0 0.75 0.09
 5 -17 0 0.61 0.1
 5 17 1 0.03 0.02
 -5 17 -1 0.03 0.02
 5 -17 1 0.06 0.03
 5 -17 1 0.04 0.03
 5 17 2 0.53 0.1
 -5 17 -2 0.53 0.08
 5 -17 2 0.54 0.09
 5 -17 2 0.56 0.1
 5 17 3 0.49 0.11
 5 -17 3 0.84 0.11
 5 -17 3 1.13 0.13
 5 17 4 0.56 0.11
 5 -17 4 0.45 0.11
 5 -17 4 0.54 0.11
 5 17 5 0.27 0.11
 5 -17 5 0.16 0.1
 5 -17 5 0.11 0.05
 5 17 6 0.26 0.1
 5 -17 6 0.03 0.04
 5 -17 6 0.08 0.05
 -5 18 10 0.03 0.03
 5 18 -10 0.18 0.12
 5 -18 -10 0.04 0.05
 5 18 -9 -0.05 0.04
 -5 18 9 0.02 0.02
 5 -18 -9 -0.02 0.04
 5 -18 -8 0.23 0.11
 -5 18 7 0.06 0.03
 5 -18 -7 0.18 0.09
 -5 18 6 0.61 0.1
 5 -18 -6 0.58 0.11
 5 18 -5 0.01 0.01
 -5 18 5 0 0.02
 5 -18 -5 0.01 0.03
 -5 -18 5 -0.02 0.01
 5 -18 -5 0.03 0.03
 5 18 -4 0.38 0.08
 -5 18 4 0.27 0.08
 5 -18 -4 0.47 0.09
 5 -18 -4 0.4 0.07
 5 18 -3 1.64 0.15
 -5 18 3 1.91 0.16
 5 -18 -3 1.61 0.14
 5 -18 -3 1.72 0.15
 -5 18 2 4.72 0.32
 5 18 -2 5.26 0.33
 5 -18 -2 4.57 0.32
 5 -18 -2 4.42 0.32
 5 18 -1 0.2 0.08
 -5 18 1 0.17 0.07
 5 -18 -1 0.14 0.06
 5 -18 -1 0.06 0.03
 -5 18 0 3.47 0.25
 5 18 0 3.92 0.27
 5 -18 0 3.54 0.26
 5 -18 0 3.37 0.25
 5 18 1 1.63 0.15
 -5 18 -1 1.55 0.13
 5 -18 1 1.69 0.15
 5 -18 1 1.61 0.14
 5 18 2 0.32 0.1
 5 -18 2 0.35 0.1
 5 -18 2 0.51 0.09
 5 18 3 0 0.02
 5 -18 3 0.01 0.03
 5 -18 3 0.01 0.04
 5 18 4 0.34 0.1
 5 -18 4 0.21 0.09
 5 -18 4 0.18 0.1
 5 18 5 0.53 0.12
 5 -18 5 0.25 0.13
 5 -18 5 0.39 0.12
 5 18 6 0.01 0.02
 5 -18 6 0.01 0.04
 5 -18 6 0.05 0.05
 -5 19 10 0.02 0.02
 5 -19 -10 0.08 0.05
 -5 19 9 0.01 0.02
 5 -19 -9 0.04 0.04
 -5 19 8 0.28 0.11
 5 -19 -8 0.23 0.1
 -5 19 7 0 0.02
 5 -19 -7 0.06 0.04
 -5 19 6 1.21 0.14
 5 -19 -6 1.14 0.14
 5 19 -5 0.12 0.07
 5 -19 -5 0.13 0.09
 -5 19 4 0 0.02
 5 19 -4 0.01 0.02
 5 -19 -4 -0.01 0.02
 5 -19 -4 0 0.03
 5 19 -3 2.37 0.18
 -5 19 3 2.28 0.18
 5 -19 -3 2.08 0.18
 5 -19 -3 2.09 0.17
 5 19 -2 1.01 0.11
 -5 19 2 0.98 0.11
 5 -19 -2 0.88 0.12
 5 -19 -2 0.89 0.1
 -5 19 1 2.17 0.18
 5 19 -1 2.28 0.19
 5 -19 -1 2.15 0.18
 5 -19 -1 2.14 0.17
 5 19 0 0.49 0.1
 -5 19 0 0.51 0.09
 5 -19 0 0.56 0.08
 5 -19 0 0.46 0.1
 -5 19 -1 0.18 0.07
 5 19 1 0.2 0.08
 5 -19 1 0.37 0.09
 5 -19 1 0.29 0.07
 5 19 2 0.39 0.1
 5 -19 2 0.42 0.09
 5 -19 2 0.4 0.1
 5 19 3 0.33 0.11
 5 -19 3 0.1 0.05
 5 -19 3 0.24 0.09
 5 19 4 0.23 0.11
 5 -19 4 0.35 0.1
 5 -19 4 0.38 0.11
 5 19 5 0.76 0.14
 5 -19 5 0.59 0.14
 5 -19 5 0.76 0.13
 5 19 6 0.15 0.11
 5 -19 6 0.35 0.13
 5 -19 6 0.06 0.05
 -5 20 10 0.05 0.03
 5 -20 -10 0.05 0.05
 -5 20 9 0.04 0.03
 5 -20 -9 0.08 0.05
 -5 20 8 0 0.02
 5 -20 -8 0.06 0.04
 -5 20 7 0.46 0.11
 5 -20 -7 0.5 0.12
 -5 20 6 0.13 0.09
 5 -20 -6 0.03 0.03
 -5 20 5 2.72 0.22
 5 20 -5 2.48 0.2
 5 -20 -5 2.73 0.22
 5 20 -4 0.41 0.08
 -5 20 4 0.39 0.1
 5 -20 -4 0.55 0.1
 -5 20 3 2.43 0.2
 5 20 -3 2.46 0.19
 5 -20 -3 2.42 0.2
 -5 20 2 0.29 0.09
 5 20 -2 0.26 0.08
 5 -20 -2 0.28 0.09
 5 -20 -2 0.25 0.07
 5 20 -1 0.91 0.12
 -5 20 1 0.95 0.11
 5 -20 -1 0.98 0.12
 5 -20 -1 0.85 0.1
 5 20 0 0.39 0.1
 -5 20 0 0.42 0.08
 5 -20 0 0.43 0.08
 5 -20 0 0.54 0.11
 5 20 1 0.14 0.08
 -5 20 -1 0.13 0.07
 5 -20 1 0.24 0.09
 5 -20 1 0.25 0.07
 5 -20 2 0.18 0.07
 5 -20 2 0.12 0.09
 5 20 3 -0.01 0.02
 5 -20 3 0 0.04
 5 -20 3 0.02 0.03
 5 20 4 0.29 0.11
 5 -20 4 0.42 0.11
 5 -20 4 0.73 0.14
 5 20 5 0.18 0.12
 5 -20 5 0 0.05
 5 -20 5 0.13 0.09
 5 20 6 0.03 0.03
 5 -20 6 0.02 0.05
 5 -20 6 0.01 0.04
 -5 21 9 0.16 0.11
 5 -21 -9 0 0.04
 -5 21 8 0.06 0.03
 5 -21 -8 0.09 0.05
 -5 21 7 0.47 0.12
 5 -21 -7 0.41 0.12
 -5 21 6 2.82 0.23
 5 -21 -6 2.64 0.23
 -5 21 5 0.55 0.11
 5 -21 -5 0.51 0.11
 -5 21 4 4.85 0.33
 5 21 -4 4.72 0.32
 5 -21 -4 4.68 0.33
 5 21 -3 0.6 0.1
 -5 21 3 0.86 0.12
 5 -21 -3 0.89 0.12
 5 21 -2 1.39 0.14
 -5 21 2 1.48 0.14
 5 -21 -2 1.47 0.15
 5 21 -1 0.02 0.02
 -5 21 1 0 0.02
 5 -21 -1 0.03 0.03
 -5 21 0 0.41 0.09
 5 21 0 0.45 0.11
 5 -21 0 0.52 0.11
 5 -21 0 0.6 0.09
 5 21 1 0.18 0.09
 -5 21 -1 0.17 0.08
 5 -21 1 0.21 0.07
 5 -21 1 0.15 0.09
 5 21 2 0.71 0.12
 5 -21 2 0.94 0.13
 5 -21 2 0.71 0.1
 5 21 3 0.05 0.03
 5 -21 3 0.06 0.04
 5 -21 3 0.06 0.04
 5 21 4 0 0.03
 5 -21 4 -0.03 0.04
 5 -21 4 -0.02 0.04
 5 21 5 0.21 0.12
 5 -21 5 -0.01 0.05
 5 -21 5 -0.04 0.03
 -5 22 9 0.03 0.03
 5 -22 -9 -0.01 0.04
 -5 22 8 0.51 0.12
 5 -22 -8 0.43 0.12
 5 -22 -7 0.2 0.11
 -5 22 6 0.02 0.02
 5 -22 -6 0 0.03
 -5 22 5 -0.02 0.02
 5 -22 -5 -0.04 0.03
 -5 22 4 0.28 0.1
 5 22 -4 0.17 0.08
 5 -22 -4 0.21 0.09
 5 22 -3 0.24 0.08
 -5 22 3 0.32 0.1
 5 -22 -3 0.12 0.09
 5 22 -2 0.58 0.1
 -5 22 2 0.67 0.1
 5 -22 -2 0.59 0.11
 5 22 -1 1.53 0.16
 -5 22 1 1.63 0.15
 5 -22 -1 1.59 0.16
 5 22 0 1.01 0.13
 -5 22 0 0.92 0.11
 5 -22 0 0.87 0.13
 5 22 1 -0.02 0.02
 -5 22 -1 0 0.02
 5 -22 1 0.02 0.04
 5 22 2 0.03 0.03
 5 -22 2 0.2 0.11
 5 -22 2 0.04 0.03
 5 22 3 0.23 0.12
 5 -22 3 0.06 0.05
 5 -22 3 0.05 0.04
 5 22 4 0.37 0.12
 5 -22 4 0.36 0.12
 5 -22 4 0.22 0.11
 5 22 5 0.02 0.03
 5 -22 5 0 0.05
 5 -22 5 -0.04 0.04
 -5 23 9 0.4 0.12
 5 -23 -9 0.31 0.12
 -5 23 8 1.24 0.16
 5 -23 -8 1.13 0.15
 -5 23 7 0.82 0.14
 5 -23 -7 0.96 0.14
 -5 23 6 0.03 0.03
 5 -23 -6 0.01 0.04
 -5 23 5 0.01 0.02
 5 -23 -5 0.04 0.04
 -5 23 4 0.12 0.1
 5 23 -4 0.12 0.07
 5 -23 -4 0.07 0.04
 5 23 -3 0.47 0.1
 -5 23 3 0.67 0.12
 5 -23 -3 0.75 0.12
 -5 23 2 0.82 0.13
 5 23 -2 1.08 0.13
 5 -23 -2 0.83 0.13
 -5 23 1 2.72 0.21
 5 23 -1 2.04 0.21
 5 -23 -1 2.68 0.22
 -5 23 0 2.17 0.19
 5 23 0 2.46 0.21
 5 -23 0 2.14 0.2
 -5 23 -1 0.2 0.08
 5 23 1 -0.01 0.02
 5 -23 1 0.07 0.04
 5 23 2 0.69 0.13
 5 -23 2 0.79 0.14
 5 23 3 0.16 0.12
 5 -23 3 0.21 0.13
 5 23 4 0.56 0.14
 5 -23 4 0.46 0.13
 5 23 5 0.01 0.03
 5 -23 5 0 0.04
 5 -23 5 0.03 0.05
 -5 24 8 0.43 0.13
 5 -24 -8 0.38 0.12
 -5 24 7 0.02 0.03
 5 -24 -7 -0.06 0.04
 -5 24 6 0.03 0.03
 5 -24 -6 0.01 0.04
 -5 24 5 -0.01 0.02
 5 -24 -5 -0.02 0.03
 5 24 -4 0.38 0.09
 -5 24 4 0.35 0.11
 5 -24 -4 0.25 0.1
 5 24 -3 0.23 0.09
 -5 24 3 0.21 0.1
 5 -24 -3 0.27 0.1
 -5 24 2 1.16 0.14
 5 24 -2 1.05 0.13
 5 -24 -2 1.09 0.14
 5 24 -1 0.76 0.13
 -5 24 1 0.72 0.12
 5 -24 -1 0.64 0.12
 -5 24 0 0.25 0.1
 5 24 0 0.23 0.11
 5 -24 0 0.24 0.1
 5 24 1 0.17 0.11
 5 -24 1 0.14 0.1
 5 24 2 1.53 0.17
 5 -24 2 1.21 0.16
 5 24 3 0.01 0.03
 5 -24 3 -0.03 0.04
 5 24 4 0.62 0.14
 5 -24 4 0.35 0.13
 -5 25 8 0.33 0.13
 5 -25 -8 0.25 0.12
 -5 25 7 0.03 0.03
 5 -25 -7 0.05 0.04
 -5 25 6 0.54 0.13
 5 -25 -6 0.49 0.13
 -5 25 5 0.15 0.11
 5 -25 -5 0.22 0.11
 5 25 -4 0.13 0.08
 -5 25 4 0.21 0.12
 5 -25 -4 0.32 0.11
 -5 25 3 -0.03 0.02
 5 25 -3 0.03 0.02
 5 -25 -3 0.04 0.04
 5 25 -2 0.32 0.11
 -5 25 2 0.25 0.1
 5 -25 -2 0.38 0.11
 5 25 -1 1.04 0.14
 -5 25 1 0.69 0.13
 5 -25 -1 0.93 0.14
 5 25 0 1.06 0.15
 -5 25 0 1.03 0.13
 5 -25 0 0.89 0.14
 5 25 1 0.29 0.12
 5 25 2 1.82 0.19
 5 -25 2 1.82 0.2
 5 25 3 0.27 0.12
 5 -25 3 0.09 0.05
 5 25 4 0.46 0.13
 5 -25 4 0.25 0.13
 -5 26 7 0.37 0.13
 5 -26 -7 0.11 0.05
 -5 26 6 0.05 0.03
 5 -26 -6 0.18 0.11
 -5 26 5 0.02 0.03
 5 -26 -5 0.05 0.04
 -5 26 4 -0.02 0.02
 5 -26 -4 -0.02 0.04
 -5 26 3 -0.01 0.02
 5 26 -3 0.01 0.02
 5 -26 -3 0 0.04
 -5 26 2 0.28 0.11
 5 26 -2 0.15 0.11
 5 -26 -2 0.33 0.11
 -5 26 1 0.52 0.12
 5 26 -1 0.5 0.13
 5 -26 -1 0.48 0.12
 5 26 0 0.23 0.12
 -5 26 0 0.13 0.1
 5 -26 0 0.26 0.12
 5 26 1 0.93 0.15
 5 -26 1 1.12 0.16
 5 26 2 0.29 0.12
 5 -26 2 0.31 0.12
 5 26 3 1.45 0.18
 5 -26 3 1.64 0.19
 -5 27 7 -0.01 0.02
 5 -27 -7 -0.02 0.04
 -5 27 6 0.28 0.13
 5 -27 -6 0.27 0.12
 -5 27 5 0.63 0.14
 -5 27 4 0.17 0.11
 5 -27 -4 0.13 0.1
 5 27 -3 0.18 0.1
 5 -27 -3 -0.01 0.04
 -5 27 2 0.54 0.13
 5 27 -2 0.47 0.12
 5 -27 -2 0.44 0.12
 -5 27 1 1.11 0.15
 5 27 -1 1.25 0.16
 5 -27 -1 1.11 0.16
 -5 27 0 0.14 0.1
 5 -27 0 -0.02 0.04
 5 27 1 0.8 0.15
 5 -27 1 0.3 0.13
 5 27 2 0.02 0.03
 5 -27 2 0.07 0.05
 5 -27 3 0.16 0.13
 -5 28 6 0.03 0.03
 5 -28 -6 0 0.04
 -5 28 5 -0.01 0.03
 5 -28 -5 -0.03 0.04
 -5 28 4 0.15 0.12
 5 -28 -4 -0.02 0.04
 -5 28 3 0.33 0.13
 5 -28 -3 0.25 0.12
 -5 28 2 1.16 0.16
 5 28 -2 1.02 0.14
 5 -28 -2 1.08 0.15
 5 28 -1 0.04 0.03
 -5 28 1 0.01 0.03
 5 -28 -1 0.03 0.04
 -5 28 0 0.85 0.14
 5 28 0 1.12 0.16
 5 -28 0 0.67 0.14
 5 28 1 0.01 0.03
 5 -28 1 0.08 0.05
 5 28 2 0.01 0.03
 5 -28 2 -0.04 0.04
 5 -29 -5 0.2 0.12
 -5 29 4 0.85 0.16
 5 -29 -4 0.82 0.14
 5 29 -3 0.01 0.02
 -5 29 3 0.02 0.03
 5 -29 -3 0 0.04
 -5 29 2 0.02 0.03
 5 29 -2 0.02 0.03
 5 -29 -2 0.02 0.04
 -5 29 1 0.55 0.13
 5 29 -1 0.36 0.14
 5 -29 -1 0.43 0.14
 5 29 0 0.19 0.12
 5 -29 0 0.25 0.12
 5 29 1 -0.02 0.03
 5 -29 1 -0.03 0.04
 5 29 2 0.25 0.13
 5 -29 2 0.06 0.05
 -5 30 4 0.01 0.03
 5 -30 -4 0.05 0.05
 5 30 -3 -0.01 0.02
 -5 30 3 0 0.03
 5 -30 -3 0 0.04
 5 30 -2 0.04 0.03
 -5 30 2 0.06 0.03
 5 -30 -2 0.06 0.05
 -5 30 1 0.01 0.03
 5 30 -1 -0.01 0.03
 5 -30 -1 0.02 0.05
 5 -30 0 0.24 0.12
 5 30 1 0 0.03
 5 -30 1 -0.04 0.04
 -5 31 3 0 0.03
 5 -31 -3 0.02 0.04
 5 31 -2 0.28 0.13
 -5 31 2 0.46 0.13
 5 -31 -2 0.27 0.12
 5 31 -1 0.17 0.13
 -5 31 1 0.28 0.12
 6 0 -12 1.06 0.15
 6 0 -12 1.44 0.19
 6 0 -11 0.21 0.13
 6 0 -10 5.23 0.38
 6 0 -10 4.89 0.34
 6 0 -9 0.17 0.09
 6 0 -9 0.1 0.08
 6 0 -8 0.1 0.06
 6 0 -8 0.13 0.08
 6 0 -7 0.13 0.06
 6 0 -7 0.16 0.08
 6 0 -6 3.22 0.21
 6 0 -6 3.15 0.23
 -6 0 6 3.05 0.22
 6 0 -5 0.09 0.04
 6 0 -5 -0.01 0.02
 -6 0 5 0.02 0.01
 6 0 -4 0.78 0.09
 6 0 -4 0.82 0.07
 -6 0 4 0.8 0.08
 -6 0 3 -0.01 0.01
 6 0 -3 0 0.01
 6 0 -3 0.01 0.02
 -6 0 2 0.16 0.05
 6 0 -2 0.29 0.06
 6 0 -2 0.27 0.04
 6 0 -1 0 0.02
 6 0 -1 0.01 0.01
 -6 0 1 -0.01 0.01
 -6 0 0 1.92 0.15
 6 0 0 1.9 0.14
 6 0 0 1.99 0.16
 6 0 1 -0.03 0.02
 6 0 1 -0.01 0.02
 -6 0 -1 0.01 0.01
 6 0 2 8.99 0.58
 -6 0 -2 9.05 0.56
 6 0 2 8.82 0.54
 6 0 3 0.01 0.03
 6 0 3 -0.01 0.02
 -6 0 -3 0.01 0.01
 6 0 4 6.3 0.44
 6 0 4 6.77 0.42
 -6 0 -4 6.52 0.42
 6 0 5 -0.01 0.03
 6 0 5 0.03 0.04
 6 0 6 0.03 0.04
 6 0 6 0.02 0.03
 6 0 7 0 0.04
 6 0 7 -0.02 0.04
 6 1 -12 0.17 0.08
 6 1 -12 0.47 0.13
 6 -1 -12 0.52 0.13
 6 -1 -12 0.57 0.17
 6 1 -11 0.38 0.11
 6 1 -11 0.69 0.15
 6 -1 -11 0.33 0.13
 6 -1 -11 0.27 0.11
 6 1 -10 0.19 0.12
 6 -1 -10 0.23 0.12
 6 -1 -10 0.14 0.09
 6 1 -9 2.46 0.21
 6 1 -9 2.55 0.19
 6 -1 -9 2.13 0.19
 6 -1 -9 2.36 0.21
 6 1 -8 0.38 0.07
 -6 1 8 0.35 0.06
 6 1 -8 0.35 0.09
 6 -1 -8 0.44 0.08
 6 -1 -8 0.43 0.1
 -6 -1 8 0.26 0.06
 6 1 -7 2.76 0.24
 6 1 -7 2.92 0.22
 -6 1 7 3.94 0.23
 6 -1 -7 4.06 0.25
 -6 -1 7 2.75 0.22
 6 1 -6 8.63 0.58
 -6 1 6 9.18 0.56
 6 1 -6 9.31 0.54
 6 -1 -6 8.76 0.58
 6 -1 -6 9.12 0.54
 -6 -1 6 9.01 0.56
 -6 1 5 0.22 0.06
 6 1 -5 0.28 0.07
 6 1 -5 0.29 0.05
 6 -1 -5 0.27 0.05
 -6 -1 5 0.17 0.06
 6 -1 -5 0.22 0.07
 -6 1 4 3.11 0.22
 6 1 -4 3.15 0.2
 6 1 -4 3.22 0.23
 6 -1 -4 3.17 0.23
 6 -1 -4 3.41 0.21
 -6 -1 4 3.17 0.22
 6 1 -3 6.19 0.34
 -6 1 3 4.54 0.33
 6 -1 -3 4.37 0.31
 -6 -1 3 5.99 0.33
 6 -1 -3 4.66 0.34
 6 1 -2 9.35 0.54
 -6 1 2 9.2 0.57
 6 1 -2 9.3 0.59
 6 -1 -2 9.14 0.59
 6 -1 -2 9.36 0.55
 -6 -1 2 9.28 0.57
 6 -1 -1 1.95 0.15
 6 -1 -1 1.89 0.13
 6 1 0 28.75 1.63
 -6 1 0 28.68 1.69
 6 1 0 27.88 1.72
 -6 -1 0 27.79 1.69
 6 -1 0 28.83 1.63
 6 -1 0 27.77 1.72
 6 1 1 0.51 0.07
 6 1 1 0.36 0.08
 -6 1 -1 0.91 0.09
 6 -1 1 0.76 0.1
 6 -1 1 0.85 0.08
 -6 -1 -1 0.58 0.08
 6 1 2 2.38 0.17
 -6 1 -2 2.23 0.17
 6 1 2 2.16 0.18
 -6 -1 -2 2.33 0.17
 6 -1 2 2.48 0.19
 6 -1 2 2.22 0.17
 6 1 3 0.21 0.09
 6 1 3 0.25 0.07
 -6 1 -3 0.28 0.07
 -6 -1 -3 0.33 0.07
 6 -1 3 0.19 0.07
 6 -1 3 0.18 0.08
 6 1 4 1.56 0.15
 6 1 4 1.33 0.13
 -6 1 -4 1.56 0.13
 -6 -1 -4 1.38 0.13
 6 -1 4 1.44 0.14
 6 -1 4 1.52 0.15
 6 1 5 0.17 0.08
 6 1 5 0.04 0.04
 6 -1 5 0.03 0.04
 6 -1 5 0.04 0.03
 6 1 6 0.01 0.04
 6 1 6 0.01 0.03
 6 -1 6 -0.01 0.03
 6 -1 6 0 0.04
 6 1 7 0.06 0.04
 6 1 7 0.07 0.05
 6 -1 7 -0.01 0.04
 6 -1 7 0.17 0.11
 6 2 -12 0.82 0.14
 6 2 -12 0.9 0.18
 6 -2 -12 0.67 0.14
 6 -2 -12 0.94 0.18
 6 2 -11 -0.02 0.06
 6 2 -11 0 0.04
 6 -2 -11 0.05 0.04
 6 -2 -11 0.27 0.13
 6 2 -10 1.09 0.13
 6 2 -10 1.28 0.17
 6 -2 -10 1.25 0.16
 6 -2 -10 1.1 0.14
 6 2 -9 0.19 0.08
 6 2 -9 0.37 0.1
 6 -2 -9 0.26 0.08
 6 -2 -9 0.28 0.1
 6 2 -8 0.05 0.03
 -6 2 8 0.21 0.06
 6 2 -8 0.11 0.08
 6 -2 -8 0.07 0.04
 6 -2 -8 0.15 0.07
 -6 2 7 5.28 0.33
 6 2 -7 5.02 0.32
 6 2 -7 5.01 0.35
 -6 -2 7 5.2 0.33
 6 -2 -7 5.11 0.33
 6 -2 -7 5.11 0.35
 6 2 -6 0.95 0.11
 6 2 -6 0.92 0.09
 -6 -2 6 0.82 0.09
 6 -2 -6 1.03 0.1
 6 -2 -6 1.17 0.12
 -6 2 5 1.51 0.12
 6 2 -5 1.53 0.11
 6 2 -5 1.57 0.14
 6 -2 -5 1.55 0.14
 6 -2 -5 1.69 0.12
 -6 -2 5 1.48 0.12
 6 2 -4 1.99 0.13
 6 2 -4 1.89 0.15
 -6 2 4 1.72 0.14
 -6 -2 4 1.9 0.15
 6 -2 -4 1.9 0.15
 6 -2 -4 1.97 0.14
 6 2 -3 0.01 0.01
 -6 2 3 0.02 0.01
 6 2 -3 0.09 0.05
 6 -2 -3 0.02 0.02
 6 -2 -3 0.07 0.04
 -6 -2 3 -0.02 0.01
 -6 2 2 0.96 0.1
 6 2 -2 1.21 0.08
 6 2 -2 1.1 0.1
 -6 -2 2 1.09 0.1
 6 -2 -2 1.02 0.1
 6 -2 -2 0.93 0.08
 -6 2 1 19.66 1.18
 6 2 -1 19.14 1.21
 6 2 -1 20.9 1.14
 6 -2 -1 19.13 1.21
 6 -2 -1 19.95 1.14
 -6 -2 1 19.17 1.18
 6 2 0 14.94 0.75
 -6 2 0 10.98 0.77
 6 2 0 14.6 0.8
 6 -2 0 10.94 0.8
 -6 -2 0 13.8 0.78
 6 -2 0 11.43 0.75
 6 2 1 8.14 0.48
 6 2 1 7.75 0.52
 -6 2 -1 8.31 0.5
 6 -2 1 7.79 0.52
 6 -2 1 8.02 0.49
 -6 -2 -1 8.25 0.5
 6 2 2 2.07 0.18
 -6 2 -2 2.05 0.16
 6 2 2 2.31 0.16
 6 -2 2 2.05 0.16
 -6 -2 -2 2.24 0.17
 6 -2 2 1.96 0.18
 -6 2 -3 0.12 0.06
 6 2 3 0.1 0.04
 6 2 3 0.05 0.03
 -6 -2 -3 0.03 0.02
 6 -2 3 0.04 0.03
 6 -2 3 0.05 0.03
 6 2 4 1.67 0.14
 6 2 4 1.52 0.15
 6 -2 4 1.54 0.14
 -6 -2 -4 1.6 0.14
 6 -2 4 1.47 0.15
 6 2 5 0.1 0.04
 6 2 5 0.13 0.08
 6 -2 5 0.09 0.05
 6 -2 5 0.23 0.08
 6 2 6 0.03 0.04
 6 2 6 0.22 0.1
 6 -2 6 0.09 0.05
 6 -2 6 0.18 0.09
 6 2 7 0.05 0.04
 6 2 7 0.21 0.11
 6 -2 7 0.04 0.05
 6 -2 7 -0.02 0.04
 6 3 -12 0.03 0.07
 6 3 -12 0.16 0.12
 6 -3 -12 0.27 0.12
 6 -3 -12 0.22 0.14
 6 3 -11 0.02 0.04
 6 3 -11 -0.06 0.05
 6 -3 -11 -0.04 0.04
 6 -3 -11 0 0.05
 6 3 -10 0.79 0.15
 6 3 -10 0.82 0.12
 6 -3 -10 0.95 0.12
 6 -3 -10 1.04 0.15
 6 3 -9 0.68 0.11
 6 3 -9 0.82 0.13
 6 -3 -9 1.06 0.12
 6 -3 -9 1.4 0.15
 6 3 -8 1.38 0.13
 -6 3 8 1.57 0.13
 6 3 -8 1.5 0.15
 6 -3 -8 1.49 0.15
 6 -3 -8 1.56 0.14
 -6 3 7 3.6 0.26
 6 3 -7 4.26 0.26
 6 3 -7 4.18 0.29
 6 -3 -7 3.39 0.28
 6 -3 -7 3.45 0.26
 -6 -3 7 4.46 0.26
 6 3 -6 1.28 0.13
 6 3 -6 1.4 0.11
 -6 3 6 1.33 0.12
 -6 -3 6 1.38 0.11
 6 -3 -6 1.24 0.13
 6 -3 -6 1.35 0.12
 -6 3 5 3.08 0.21
 6 -3 -5 2.91 0.2
 6 -3 -5 2.81 0.22
 6 3 -4 21.68 1.34
 6 3 -4 22.3 1.26
 -6 3 4 21.33 1.32
 -6 -3 4 22.3 1.32
 6 -3 -4 22.07 1.27
 6 -3 -4 22.09 1.35
 6 3 -3 4.71 0.33
 -6 3 3 6.31 0.33
 6 3 -3 4.73 0.3
 -6 -3 3 4.38 0.32
 6 3 -2 26.15 1.6
 -6 3 2 25.85 1.57
 6 3 -2 26.77 1.51
 6 -3 -2 26.4 1.6
 6 -3 -2 26.74 1.52
 -6 -3 2 25.61 1.57
 6 3 -1 0.5 0.07
 6 3 -1 0.53 0.05
 6 -3 -1 0.31 0.07
 -6 -3 1 0.48 0.07
 6 3 0 0.53 0.08
 6 3 0 0.45 0.06
 -6 3 0 0.45 0.08
 6 -3 0 0.63 0.07
 -6 -3 0 0.57 0.08
 6 -3 0 0.54 0.08
 6 3 1 0.03 0.02
 6 3 1 0.12 0.06
 6 -3 1 0.08 0.07
 -6 -3 -1 0.09 0.06
 6 -3 1 0.16 0.06
 6 3 2 9.08 0.59
 6 3 2 9.34 0.55
 -6 3 -2 9.26 0.57
 6 -3 2 9.53 0.56
 -6 -3 -2 9.05 0.57
 6 -3 2 8.98 0.6
 -6 3 -3 0.48 0.07
 6 3 3 0.29 0.07
 6 3 3 0.19 0.08
 6 -3 3 0.51 0.08
 -6 -3 -3 0.38 0.08
 6 -3 3 0.49 0.09
 6 3 4 0 0.03
 6 3 4 -0.01 0.03
 6 -3 4 0.1 0.07
 -6 -3 -4 0.02 0.02
 6 -3 4 0.04 0.04
 6 3 5 0.03 0.03
 6 3 5 0.01 0.04
 6 -3 5 0.16 0.1
 6 -3 5 0 0.03
 6 3 6 0.24 0.1
 6 3 6 0.09 0.04
 6 -3 6 0.24 0.11
 6 -3 6 0.21 0.1
 6 3 7 -0.01 0.04
 6 3 7 0.04 0.05
 6 -3 7 0.05 0.05
 6 -3 7 0.02 0.04
 6 4 -12 0.33 0.16
 6 -4 -12 0.28 0.13
 6 -4 -12 0.27 0.14
 6 4 -11 0.13 0.1
 6 4 -11 0.02 0.06
 6 -4 -11 -0.02 0.05
 6 -4 -11 0.02 0.04
 6 4 -10 0.02 0.03
 6 4 -10 0 0.05
 6 -4 -10 -0.02 0.04
 6 -4 -10 0 0.03
 6 4 -9 0.02 0.03
 6 4 -9 0.01 0.04
 6 -4 -9 0.05 0.03
 6 -4 -9 0.17 0.1
 6 4 -8 3.89 0.26
 -6 4 8 4.14 0.27
 6 4 -8 3.64 0.29
 6 -4 -8 4.09 0.29
 6 -4 -8 3.82 0.27
 6 4 -7 9.04 0.53
 6 4 -7 8.63 0.57
 -6 4 7 8.74 0.55
 -6 -4 7 9.08 0.55
 6 -4 -7 8.42 0.57
 6 -4 -7 9.02 0.54
 -6 4 6 3.59 0.27
 6 4 -6 4.37 0.29
 6 4 -6 4.68 0.26
 6 -4 -6 3.55 0.26
 6 -4 -6 3.45 0.28
 -6 -4 6 4.49 0.27
 6 4 -5 5.46 0.32
 -6 4 5 5.1 0.34
 6 4 -5 5.11 0.35
 -6 -4 5 5.61 0.34
 6 -4 -5 5.44 0.33
 6 -4 -5 5.1 0.36
 6 4 -4 2.45 0.15
 6 4 -4 2.27 0.18
 -6 -4 4 2.31 0.17
 6 4 -3 10 0.57
 6 4 -3 9.43 0.62
 -6 4 3 10.34 0.61
 6 -4 -3 10.08 0.59
 6 -4 -3 9.84 0.63
 -6 -4 3 9.68 0.61
 6 4 -2 2.35 0.18
 6 4 -2 2.21 0.15
 6 -4 -2 2.9 0.17
 6 -4 -2 2.83 0.19
 -6 -4 2 2.06 0.17
 6 4 -1 10.58 0.67
 6 4 -1 10.81 0.62
 -6 4 1 10.51 0.65
 6 -4 -1 10.19 0.67
 -6 -4 1 10.91 0.65
 6 -4 -1 10.52 0.63
 -6 4 0 0.85 0.09
 6 4 0 0.91 0.1
 6 4 0 0.81 0.07
 6 -4 0 0.97 0.09
 6 -4 0 0.9 0.1
 -6 -4 0 0.89 0.09
 6 4 1 1.91 0.13
 -6 4 -1 1.78 0.14
 6 4 1 1.69 0.15
 6 -4 1 1.67 0.15
 -6 -4 -1 1.93 0.15
 6 -4 1 1.75 0.14
 6 4 2 16.75 0.87
 -6 4 -2 13.59 0.89
 6 4 2 15.75 0.92
 -6 -4 -2 16.13 0.9
 6 -4 2 12.87 0.87
 6 -4 2 13.36 0.92
 6 4 3 6.16 0.38
 -6 4 -3 6.26 0.39
 6 4 3 5.75 0.4
 6 -4 3 6.04 0.39
 -6 -4 -3 6.18 0.39
 6 -4 3 5.75 0.41
 6 4 4 0.59 0.1
 6 4 4 0.62 0.09
 6 -4 4 0.78 0.1
 -6 -4 -4 0.61 0.09
 6 -4 4 0.78 0.11
 6 4 5 0.04 0.03
 6 4 5 0 0.03
 6 -4 5 0.15 0.1
 6 -4 5 0.05 0.03
 6 4 6 0.26 0.09
 6 4 6 0.24 0.1
 6 -4 6 0.24 0.11
 6 4 7 -0.04 0.03
 6 4 7 -0.04 0.03
 6 -4 7 0.2 0.12
 6 -4 7 -0.05 0.04
 6 5 -12 0.27 0.14
 6 -5 -12 0.09 0.06
 6 -5 -12 0.27 0.12
 6 5 -11 0.89 0.16
 6 -5 -11 0.86 0.16
 6 -5 -11 0.69 0.13
 6 5 -10 0.33 0.09
 6 5 -10 0.5 0.14
 6 -5 -10 0.29 0.13
 6 -5 -10 0.38 0.11
 6 5 -9 0.17 0.11
 6 5 -9 0 0.03
 6 -5 -9 0.22 0.08
 6 -5 -9 0.07 0.05
 6 5 -8 1 0.1
 -6 5 8 0.98 0.1
 6 5 -8 0.9 0.13
 6 -5 -8 1.04 0.12
 6 -5 -8 0.92 0.12
 -6 5 7 13.49 0.94
 6 5 -7 17.98 0.91
 6 5 -7 16.95 0.97
 6 -5 -7 13.27 0.92
 6 -5 -7 13.38 0.96
 -6 -5 7 17.88 0.94
 6 5 -6 15.55 1.01
 -6 5 6 16.15 0.99
 6 5 -6 16.52 0.95
 6 -5 -6 15.65 1.01
 6 -5 -6 16.44 0.96
 -6 -5 6 17.2 0.98
 6 5 -5 1.26 0.1
 -6 5 5 1.55 0.12
 6 5 -5 1.21 0.12
 6 -5 -5 1.6 0.13
 -6 -5 5 1.19 0.11
 6 -5 -5 1.68 0.12
 -6 5 4 1 0.1
 6 5 -4 1.11 0.1
 -6 -5 4 1.09 0.1
 6 -5 -4 1.14 0.1
 6 -5 -4 1.01 0.11
 -6 5 3 8.96 0.55
 6 -5 -3 8.89 0.57
 6 -5 -3 8.78 0.53
 6 5 -2 2.48 0.19
 -6 5 2 2.66 0.19
 6 -5 -2 2.7 0.2
 -6 -5 2 2.58 0.19
 6 -5 -2 2.57 0.18
 6 5 -1 0.83 0.09
 -6 5 1 0.63 0.08
 6 -5 -1 0.73 0.09
 6 -5 -1 0.85 0.08
 -6 -5 1 0.73 0.08
 6 5 0 10.2 0.58
 6 5 0 10.1 0.63
 -6 5 0 10.37 0.62
 6 -5 0 10.08 0.6
 -6 -5 0 9.73 0.62
 6 -5 0 9.52 0.64
 -6 5 -1 0.36 0.07
 6 5 1 0.49 0.08
 6 5 1 0.46 0.06
 6 -5 1 0.36 0.08
 -6 -5 -1 0.32 0.07
 6 -5 1 0.42 0.07
 6 5 2 0.18 0.06
 -6 5 -2 0.17 0.06
 6 5 2 0.22 0.07
 6 -5 2 0.27 0.08
 -6 -5 -2 0.33 0.07
 6 -5 2 0.31 0.07
 6 5 3 0.29 0.08
 -6 5 -3 0.23 0.06
 6 -5 3 0.24 0.08
 -6 -5 -3 0.19 0.07
 6 -5 3 0.11 0.07
 6 5 4 0.36 0.08
 6 5 4 0.55 0.09
 6 -5 4 0.44 0.09
 -6 -5 -4 0.46 0.08
 6 -5 4 0.46 0.1
 6 5 5 0.02 0.04
 6 5 5 -0.01 0.03
 6 -5 5 0.12 0.09
 6 -5 5 0.25 0.1
 6 5 6 0 0.03
 6 5 6 -0.01 0.04
 6 -5 6 -0.01 0.03
 6 -5 6 0.01 0.04
 6 5 7 0.47 0.13
 6 -5 7 0.65 0.13
 6 -5 7 0.45 0.13
 6 6 -12 0.61 0.16
 6 -6 -12 0.64 0.14
 6 -6 -12 0.6 0.16
 6 6 -11 0.03 0.06
 6 -6 -11 0.21 0.13
 6 -6 -11 0.15 0.11
 6 6 -10 0.76 0.14
 6 -6 -10 0.93 0.13
 6 -6 -10 0.94 0.15
 6 6 -9 0.01 0.04
 -6 6 9 -0.01 0.01
 6 -6 -9 -0.07 0.03
 6 -6 -9 -0.02 0.03
 6 6 -8 0.93 0.12
 -6 6 8 0.71 0.09
 6 -6 -8 0.66 0.1
 6 -6 -8 0.62 0.11
 6 6 -7 1.51 0.15
 -6 6 7 1.63 0.14
 6 -6 -7 1.5 0.14
 -6 -6 7 1.56 0.13
 6 -6 -7 1.45 0.15
 -6 6 6 1.02 0.1
 6 -6 -6 0.95 0.11
 6 -6 -6 1.08 0.11
 -6 6 5 0.02 0.01
 6 6 -5 0.08 0.06
 -6 -6 5 0.14 0.05
 6 -6 -5 0.05 0.03
 6 -6 -5 0.03 0.02
 6 6 -4 0.39 0.07
 -6 6 4 0.16 0.06
 6 -6 -4 0.25 0.06
 6 -6 -4 0.29 0.06
 -6 -6 4 0.36 0.06
 6 6 -3 17.81 1.09
 -6 6 3 17.76 1.08
 -6 -6 3 17.73 1.07
 6 -6 -3 17.73 1.04
 6 -6 -3 18.15 1.1
 -6 6 2 3.32 0.23
 6 -6 -2 3.32 0.24
 6 -6 -2 3.24 0.22
 -6 6 1 0.98 0.1
 6 6 -1 1.11 0.1
 6 -6 -1 1.12 0.11
 -6 -6 1 1.09 0.1
 6 -6 -1 1.14 0.1
 -6 6 0 8.26 0.55
 6 6 0 10.42 0.57
 6 -6 0 8.06 0.53
 -6 -6 0 9.71 0.55
 6 -6 0 7.75 0.56
 -6 6 -1 9.75 0.59
 6 6 1 9.57 0.61
 -6 -6 -1 9.65 0.6
 6 -6 1 9.86 0.58
 6 -6 1 9 0.61
 -6 6 -2 0.97 0.1
 6 6 2 1.1 0.11
 6 6 2 1.12 0.1
 6 -6 2 1.11 0.12
 6 -6 2 1.15 0.11
 -6 -6 -2 0.97 0.11
 6 6 3 0.47 0.07
 -6 6 -3 0.48 0.07
 6 6 3 0.49 0.08
 6 -6 3 0.46 0.09
 6 -6 3 0.44 0.09
 -6 -6 -3 0.44 0.08
 6 6 4 6.08 0.37
 6 6 4 5.92 0.4
 6 -6 4 5.89 0.41
 -6 -6 -4 5.64 0.38
 6 -6 4 5.63 0.38
 6 6 5 0.01 0.03
 6 6 5 0.01 0.03
 -6 -6 -5 -0.02 0.02
 6 -6 5 0.04 0.04
 6 -6 5 0.04 0.03
 6 6 6 0.02 0.04
 6 -6 6 0.01 0.04
 6 -6 6 0.04 0.04
 6 6 7 0.21 0.11
 6 -6 7 0.24 0.12
 6 -6 7 0.35 0.12
 6 7 -12 0.7 0.17
 6 -7 -12 0.48 0.13
 6 -7 -12 0.75 0.16
 6 7 -11 0.21 0.13
 6 -7 -11 0.31 0.12
 6 -7 -11 0.34 0.13
 6 7 -10 0.04 0.05
 6 -7 -10 0 0.04
 6 -7 -10 0.02 0.05
 -6 7 9 0.94 0.11
 6 7 -9 0.81 0.14
 6 -7 -9 1.3 0.14
 6 -7 -9 1.16 0.13
 6 7 -8 1.04 0.13
 -6 7 8 1.02 0.1
 6 -7 -8 0.86 0.11
 6 -7 -8 1.11 0.13
 6 7 -7 5.25 0.41
 -6 7 7 6.53 0.4
 6 -7 -7 6.78 0.42
 -6 -7 7 5.65 0.38
 6 -7 -7 6.52 0.4
 6 7 -6 1 0.11
 -6 7 6 1.08 0.11
 6 -7 -6 1.09 0.11
 6 -7 -6 1.05 0.12
 -6 -7 6 1.09 0.1
 -6 7 5 0.97 0.09
 6 7 -5 0.48 0.09
 -6 -7 5 0.6 0.08
 6 -7 -5 0.77 0.09
 6 -7 -5 0.77 0.09
 6 7 -4 4.56 0.3
 -6 7 4 4.23 0.3
 -6 -7 4 4.64 0.29
 6 -7 -4 4.52 0.29
 6 -7 -4 4.47 0.31
 -6 7 3 6.94 0.46
 6 7 -3 7.73 0.47
 6 -7 -3 7.11 0.47
 6 -7 -3 7 0.44
 -6 -7 3 7.66 0.46
 -6 7 2 0.13 0.06
 6 7 -2 0.27 0.06
 -6 -7 2 0.17 0.06
 6 -7 -2 0.21 0.06
 6 -7 -2 0.19 0.07
 6 7 -1 2.27 0.17
 -6 7 1 2.24 0.17
 6 -7 -1 2.24 0.18
 -6 -7 1 1.91 0.16
 6 -7 -1 2.61 0.17
 -6 7 0 2.14 0.17
 6 7 0 2.31 0.18
 6 -7 0 2.45 0.17
 6 -7 0 2.49 0.19
 6 7 1 6 0.38
 -6 7 -1 5.6 0.37
 6 -7 1 5.64 0.37
 6 -7 1 5.77 0.39
 -6 -7 -1 5.98 0.38
 -6 7 -2 2.22 0.17
 6 7 2 2.29 0.18
 -6 -7 -2 2.42 0.18
 6 -7 2 2.34 0.19
 6 -7 2 2.3 0.18
 -6 7 -3 0.33 0.07
 6 7 3 0.26 0.07
 6 -7 3 0.45 0.09
 6 -7 3 0.4 0.09
 -6 -7 -3 0.54 0.09
 6 7 4 0.93 0.11
 -6 -7 -4 0.71 0.1
 6 -7 4 0.83 0.12
 6 -7 4 0.85 0.11
 6 7 5 0 0.03
 -6 -7 -5 0.11 0.08
 6 -7 5 0.06 0.04
 6 -7 5 -0.03 0.03
 6 7 6 0 0.03
 6 -7 6 -0.02 0.04
 6 -7 6 0.21 0.11
 6 7 7 0.25 0.1
 6 -7 7 0.1 0.06
 6 -7 7 0.18 0.1
 6 8 -12 1.31 0.2
 6 -8 -12 1.65 0.2
 6 -8 -12 1.37 0.18
 6 8 -11 2.05 0.23
 6 -8 -11 2.13 0.21
 6 -8 -11 1.97 0.2
 6 8 -10 0.77 0.15
 6 -8 -10 0.91 0.15
 6 -8 -10 0.94 0.14
 -6 8 9 0.02 0.02
 6 8 -9 0.02 0.04
 6 -8 -9 0.02 0.03
 6 -8 -9 0.03 0.04
 -6 8 8 1.49 0.13
 6 8 -8 1.26 0.15
 6 -8 -8 1.63 0.15
 6 -8 -8 1.48 0.14
 6 8 -7 2.84 0.22
 -6 8 7 2.74 0.21
 6 -8 -7 2.83 0.21
 6 -8 -7 2.79 0.22
 -6 -8 7 3.14 0.21
 -6 8 6 9.76 0.59
 6 8 -6 8.58 0.6
 6 -8 -6 9.59 0.58
 -6 -8 6 9.15 0.58
 6 -8 -6 10.1 0.61
 -6 8 5 0.31 0.06
 6 8 -5 0.28 0.08
 -6 -8 5 0.32 0.06
 6 -8 -5 0.27 0.07
 6 -8 -5 0.29 0.08
 6 8 -4 1.54 0.14
 -6 8 4 2.02 0.15
 6 -8 -4 2.22 0.15
 -6 -8 4 1.38 0.14
 6 -8 -4 2.27 0.16
 6 8 -3 0.06 0.05
 -6 8 3 0.02 0.02
 -6 -8 3 0.02 0.01
 6 -8 -3 0.09 0.05
 6 -8 -3 0.17 0.06
 6 8 -2 3.62 0.24
 -6 8 2 3.41 0.23
 -6 -8 2 3.14 0.23
 6 -8 -2 3.49 0.23
 6 -8 -2 3.32 0.24
 -6 8 1 10.91 0.66
 6 8 -1 10.88 0.67
 -6 -8 1 10.5 0.66
 6 -8 -1 10.85 0.65
 6 -8 -1 10.61 0.68
 6 8 0 6.87 0.46
 -6 8 0 7.99 0.46
 6 8 0 6.16 0.46
 6 -8 0 8.36 0.48
 -6 -8 0 6.44 0.46
 6 -8 0 7.92 0.45
 6 8 1 0.13 0.06
 6 8 1 0.02 0.02
 6 -8 1 0.08 0.06
 6 -8 1 0.09 0.07
 -6 8 -2 0.6 0.08
 6 8 2 0.72 0.1
 6 8 2 0.74 0.09
 6 -8 2 0.66 0.1
 6 -8 2 0.61 0.09
 -6 -8 -2 0.81 0.1
 6 8 3 0.28 0.07
 6 8 3 0.28 0.08
 -6 8 -3 0.28 0.07
 6 -8 3 0.25 0.09
 -6 -8 -3 0.29 0.08
 6 -8 3 0.53 0.09
 6 8 4 0 0.03
 6 8 4 0 0.02
 6 -8 4 0.03 0.04
 6 -8 4 0.12 0.08
 -6 -8 -4 0.02 0.02
 6 8 5 0.03 0.03
 -6 -8 -5 0.02 0.02
 6 -8 5 0 0.03
 6 -8 5 0.01 0.04
 6 8 6 0.58 0.11
 6 -8 6 0.74 0.13
 6 -8 6 0.7 0.14
 6 -8 7 0.2 0.12
 6 -8 7 0.38 0.13
 6 9 -11 0.4 0.15
 6 -9 -11 0.62 0.13
 6 -9 -11 0.2 0.11
 6 9 -10 0.3 0.12
 6 -9 -10 0.31 0.12
 -6 9 9 1.03 0.12
 6 9 -9 1.32 0.15
 6 -9 -9 1.15 0.14
 6 -9 -9 0.96 0.13
 6 9 -8 0.25 0.1
 6 -9 -8 0.19 0.09
 6 -9 -8 0.17 0.09
 6 9 -7 1.7 0.15
 -6 9 7 1.42 0.13
 6 -9 -7 1.25 0.14
 6 -9 -7 1.48 0.15
 -6 9 6 0.15 0.06
 6 9 -6 0.33 0.08
 6 -9 -6 0.17 0.07
 -6 -9 6 0.25 0.06
 6 -9 -6 0.28 0.08
 6 9 -5 5.18 0.31
 -6 9 5 3.89 0.29
 -6 -9 5 5.04 0.29
 6 -9 -5 4.19 0.3
 6 -9 -5 3.88 0.29
 6 9 -4 0.04 0.02
 -6 9 4 -0.01 0.01
 -6 -9 4 0 0.01
 6 -9 -4 -0.01 0.02
 6 -9 -4 0 0.02
 -6 9 3 0.43 0.07
 6 -9 -3 0.47 0.07
 6 -9 -3 0.55 0.08
 -6 9 2 9.75 0.62
 6 9 -2 10.29 0.63
 6 -9 -2 10.06 0.64
 -6 -9 2 9.92 0.62
 6 -9 -2 10.01 0.6
 -6 9 1 0.15 0.06
 6 9 -1 0.34 0.06
 6 9 -1 0.24 0.07
 6 -9 -1 0.16 0.06
 -6 -9 1 0.29 0.06
 6 -9 -1 0.23 0.06
 -6 9 0 1.21 0.11
 6 9 0 1.3 0.11
 6 9 0 1.1 0.12
 6 -9 0 1.27 0.12
 6 -9 0 1.1 0.11
 -6 -9 0 1.26 0.12
 -6 9 -1 0.65 0.08
 6 -9 1 0.79 0.09
 6 -9 1 0.6 0.09
 -6 9 -2 5.36 0.35
 6 9 2 5.49 0.36
 6 9 2 5.26 0.36
 6 -9 2 5.48 0.37
 6 -9 2 5.11 0.35
 -6 -9 -2 5.58 0.36
 6 9 3 2.92 0.23
 6 9 3 2.93 0.23
 6 -9 3 3.19 0.23
 6 -9 3 3.35 0.25
 -6 -9 -3 3.2 0.23
 6 9 4 1.41 0.13
 6 9 4 1.16 0.12
 6 -9 4 1.26 0.15
 -6 -9 -4 1.29 0.13
 6 -9 4 1.28 0.14
 6 9 5 0.74 0.11
 6 9 5 0.74 0.11
 -6 -9 -5 0.84 0.12
 6 -9 5 1.1 0.14
 6 -9 5 0.9 0.13
 6 -9 6 0.33 0.11
 6 -9 6 0.52 0.13
 6 -9 7 0.02 0.05
 6 -9 7 -0.03 0.04
 6 10 -11 0.54 0.14
 6 -10 -11 0.47 0.13
 6 -10 -11 0.41 0.13
 6 10 -10 0.03 0.05
 6 -10 -10 0.02 0.04
 6 -10 -10 -0.03 0.03
 -6 10 9 0.96 0.11
 6 10 -9 0.92 0.14
 6 -10 -9 0.99 0.13
 6 -10 -9 0.99 0.13
 -6 10 8 4.06 0.28
 6 10 -8 3.79 0.3
 6 -10 -8 4.27 0.29
 6 -10 -8 4.04 0.3
 6 10 -7 0.3 0.09
 -6 10 7 0.32 0.08
 6 -10 -7 0.38 0.09
 6 -10 -7 0.39 0.09
 -6 10 6 0.18 0.07
 6 10 -6 0.56 0.08
 6 -10 -6 0.23 0.07
 6 -10 -6 0.17 0.07
 6 10 -5 5.73 0.38
 -6 10 5 5.56 0.38
 -6 -10 5 5.9 0.37
 6 -10 -5 5.9 0.39
 6 -10 -5 5.8 0.37
 -6 10 4 2.14 0.16
 6 10 -4 2.14 0.16
 6 -10 -4 2.36 0.17
 6 -10 -4 2.12 0.16
 -6 -10 4 1.91 0.16
 -6 10 3 3.44 0.24
 6 10 -3 3.38 0.23
 6 -10 -3 3.47 0.24
 -6 -10 3 3.44 0.24
 6 -10 -3 3.38 0.23
 -6 10 2 2.99 0.2
 6 -10 -2 3.35 0.22
 6 -10 -2 3.23 0.21
 -6 -10 2 2.05 0.2
 -6 10 1 7.1 0.45
 6 10 -1 7.37 0.46
 6 10 -1 7.25 0.45
 6 -10 -1 7.06 0.46
 6 -10 -1 6.83 0.44
 -6 -10 1 6.77 0.45
 6 10 0 0.22 0.06
 6 10 0 0.12 0.07
 -6 10 0 0.25 0.06
 6 -10 0 0.43 0.08
 6 -10 0 0.42 0.08
 -6 -10 0 0.3 0.07
 6 10 1 8.03 0.51
 -6 10 -1 8.23 0.5
 6 10 1 8.22 0.52
 -6 -10 -1 8.02 0.51
 6 -10 1 7.74 0.52
 6 -10 1 7.75 0.5
 -6 10 -2 0.34 0.07
 6 10 2 0.39 0.07
 6 10 2 0.41 0.09
 6 -10 2 0.56 0.09
 6 -10 2 0.4 0.09
 6 10 3 3.12 0.24
 6 10 3 2.96 0.22
 6 -10 3 3.29 0.25
 6 -10 3 3.16 0.23
 -6 -10 -3 3.05 0.23
 6 10 4 1.28 0.14
 6 10 4 1.24 0.13
 -6 -10 -4 1.25 0.14
 6 -10 4 1.56 0.15
 6 -10 4 1.53 0.16
 6 10 5 0.18 0.09
 6 -10 5 0.15 0.12
 6 -10 5 0.01 0.04
 6 -10 6 0.03 0.04
 6 -10 6 0.01 0.04
 6 -10 7 0.12 0.06
 6 -10 7 0.21 0.12
 6 11 -11 0.28 0.13
 6 -11 -11 0.31 0.12
 6 11 -10 0.07 0.05
 6 -11 -10 0.05 0.04
 6 -11 -10 0.04 0.05
 6 11 -9 0.16 0.11
 -6 11 9 0.01 0.02
 6 -11 -9 0.01 0.04
 6 -11 -9 0.02 0.04
 -6 11 8 0.12 0.07
 6 11 -8 -0.02 0.03
 6 -11 -8 0 0.03
 6 -11 -8 0 0.03
 -6 11 7 6.1 0.41
 6 11 -7 6.67 0.43
 6 -11 -7 6.16 0.41
 6 -11 -7 6.24 0.42
 6 11 -6 0.05 0.03
 -6 11 6 0.01 0.02
 6 -11 -6 0.01 0.03
 6 -11 -6 0.02 0.03
 -6 -11 6 0.02 0.01
 6 11 -5 1.69 0.14
 -6 11 5 1.35 0.13
 6 -11 -5 1.33 0.13
 6 -11 -5 1.51 0.14
 -6 -11 5 1.69 0.13
 6 11 -4 1.52 0.12
 -6 11 4 1.31 0.12
 -6 -11 4 1.4 0.12
 6 -11 -4 1.29 0.12
 6 -11 -4 1.33 0.12
 6 11 -3 2.63 0.16
 -6 11 3 1.99 0.16
 6 -11 -3 1.7 0.16
 -6 -11 3 2.44 0.17
 6 -11 -3 1.76 0.16
 6 11 -2 0.07 0.05
 -6 11 2 0.13 0.06
 6 11 -2 0.13 0.07
 6 -11 -2 0.08 0.06
 6 -11 -2 0.03 0.02
 -6 -11 2 0.11 0.06
 6 11 -1 0.95 0.11
 6 11 -1 0.98 0.1
 6 -11 -1 1.4 0.11
 -6 -11 1 0.96 0.11
 6 11 0 -0.02 0.02
 -6 11 0 -0.02 0.01
 6 11 0 0 0.01
 6 -11 0 0 0.02
 6 -11 0 0.02 0.02
 6 11 1 2.09 0.16
 -6 11 -1 1.9 0.15
 6 11 1 2.15 0.17
 6 -11 1 1.88 0.17
 6 -11 1 1.99 0.16
 -6 11 -2 0.15 0.06
 6 11 2 0.33 0.09
 6 11 2 0.25 0.07
 6 -11 2 0.32 0.08
 6 -11 2 0.3 0.09
 6 11 3 0.16 0.06
 6 11 3 0.12 0.08
 6 -11 3 0.17 0.09
 6 11 4 0 0.02
 6 -11 4 0.05 0.04
 6 -11 4 -0.01 0.04
 6 11 5 0.21 0.09
 6 -11 5 0.15 0.11
 6 -11 5 0.26 0.11
 -6 -11 -5 0.2 0.09
 6 -11 6 0.43 0.12
 6 -11 6 0.23 0.12
 6 -11 7 0.06 0.05
 6 -11 7 -0.01 0.04
 6 12 -11 -0.02 0.05
 6 -12 -11 0.05 0.05
 6 -12 -11 -0.01 0.05
 6 12 -10 0.89 0.15
 6 -12 -10 1.11 0.15
 6 -12 -10 1.22 0.15
 -6 12 9 0.01 0.02
 6 12 -9 0.04 0.04
 6 -12 -9 0.02 0.04
 6 -12 -9 0.05 0.04
 -6 12 8 0.04 0.02
 6 12 -8 0.06 0.04
 6 -12 -8 0.05 0.04
 6 -12 -8 0.11 0.08
 -6 12 7 1.49 0.13
 6 12 -7 1.23 0.14
 6 -12 -7 1.17 0.14
 6 -12 -7 1.19 0.14
 -6 12 6 2.18 0.17
 6 12 -6 2.06 0.17
 6 -12 -6 2.04 0.17
 -6 -12 6 2.14 0.16
 6 -12 -6 2.01 0.17
 -6 12 5 0.55 0.08
 6 12 -5 0.48 0.08
 6 -12 -5 0.4 0.08
 6 -12 -5 0.47 0.08
 -6 -12 5 0.34 0.07
 -6 12 4 0.64 0.09
 6 -12 -4 0.8 0.09
 6 -12 -4 0.67 0.09
 6 12 -3 15.52 0.94
 -6 12 3 14.7 0.93
 6 -12 -3 14.78 0.91
 6 -12 -3 16.03 0.95
 -6 -12 3 15.57 0.93
 -6 12 2 1.07 0.11
 6 -12 -2 1.02 0.11
 6 -12 -2 1.17 0.12
 -6 12 1 3.31 0.23
 6 12 -1 3.16 0.23
 6 12 -1 3.21 0.22
 6 -12 -1 3.08 0.23
 6 -12 -1 3.23 0.24
 -6 12 0 0.43 0.07
 6 12 0 0.58 0.07
 6 12 0 0.53 0.09
 6 -12 0 0.44 0.08
 6 -12 0 0.39 0.08
 6 12 1 2.21 0.19
 -6 12 -1 2.18 0.17
 6 12 1 2.44 0.17
 6 -12 1 2.27 0.18
 6 -12 1 2.45 0.19
 -6 12 -2 2.51 0.18
 6 12 2 2.23 0.2
 6 -12 2 2.68 0.21
 6 -12 2 2.68 0.2
 6 12 3 0.97 0.12
 6 -12 3 1.01 0.13
 6 -12 3 0.98 0.12
 6 12 4 0.51 0.1
 6 -12 4 0.55 0.11
 6 -12 4 0.46 0.11
 6 12 5 0.92 0.13
 -6 -12 -5 0.99 0.13
 6 -12 5 0.91 0.15
 6 -12 5 1.23 0.15
 6 -12 6 0.16 0.1
 6 -12 6 0.08 0.05
 6 13 -11 0.87 0.16
 6 -13 -11 0.68 0.13
 6 -13 -11 0.51 0.14
 6 13 -10 -0.01 0.05
 6 -13 -10 0.01 0.04
 6 -13 -10 0.04 0.04
 6 13 -9 0.51 0.12
 -6 13 9 0.25 0.08
 6 -13 -9 0.24 0.1
 6 -13 -9 0.3 0.1
 6 13 -8 0.25 0.1
 -6 13 8 0.2 0.09
 6 -13 -8 0.24 0.09
 6 -13 -8 0.22 0.09
 -6 13 7 0.51 0.09
 6 13 -7 0.58 0.1
 6 -13 -7 0.42 0.09
 6 -13 -7 0.43 0.1
 -6 13 6 3.93 0.28
 6 13 -6 3.93 0.28
 -6 -13 6 3.71 0.26
 6 -13 -6 3.91 0.28
 6 -13 -6 3.91 0.27
 6 13 -5 2.4 0.18
 -6 13 5 2.01 0.18
 6 -13 -5 2.11 0.18
 -6 -13 5 2.34 0.17
 6 -13 -5 2.13 0.18
 -6 13 4 0.08 0.07
 6 13 -4 0 0.02
 -6 -13 4 0.08 0.06
 6 -13 -4 0.02 0.03
 6 -13 -4 0.02 0.02
 6 13 -3 0.7 0.08
 -6 13 3 0.43 0.09
 6 13 -3 0.79 0.1
 -6 -13 3 0.66 0.09
 6 -13 -3 0.66 0.09
 6 -13 -3 0.46 0.09
 6 13 -2 3.5 0.25
 -6 13 2 3.77 0.25
 6 13 -2 3.67 0.24
 6 -13 -2 3.64 0.25
 6 -13 -2 3.52 0.26
 -6 -13 2 3.49 0.25
 -6 13 1 2.47 0.19
 6 13 -1 2.71 0.18
 6 13 -1 2.73 0.2
 6 -13 -1 2.33 0.2
 6 -13 -1 2.35 0.19
 -6 13 0 0.02 0.02
 6 13 0 0.03 0.02
 6 -13 0 0.04 0.03
 6 -13 0 0.12 0.07
 -6 13 -1 0.32 0.07
 6 13 1 0.21 0.08
 6 -13 1 0.26 0.09
 6 -13 1 0.25 0.08
 -6 13 -2 0.12 0.06
 6 13 2 0.11 0.08
 6 -13 2 0.23 0.08
 6 -13 2 0.13 0.08
 6 -13 3 0.21 0.09
 6 -13 3 0.13 0.08
 6 13 4 0.01 0.02
 6 -13 4 0 0.04
 6 -13 4 0.01 0.04
 6 13 5 0.02 0.02
 6 -13 5 0.04 0.04
 6 -13 5 0.28 0.11
 6 -13 6 0.32 0.12
 6 -13 6 0.21 0.12
 6 14 -11 0.75 0.16
 6 -14 -11 0.55 0.14
 6 -14 -11 0.6 0.14
 -6 14 10 0.36 0.1
 6 14 -10 0.35 0.12
 6 -14 -10 0.54 0.12
 6 -14 -10 0.27 0.1
 6 14 -9 0.33 0.12
 -6 14 9 0.31 0.1
 6 -14 -9 0.22 0.11
 6 -14 -9 0.35 0.1
 6 14 -8 0.14 0.09
 -6 14 8 0.33 0.1
 6 -14 -8 0.13 0.1
 6 -14 -8 0.36 0.1
 -6 14 7 6.36 0.4
 6 14 -7 5.88 0.41
 6 -14 -7 5.82 0.4
 6 -14 -7 5.9 0.4
 6 14 -6 1.91 0.15
 -6 -14 6 1.4 0.13
 6 -14 -6 1.43 0.14
 6 -14 -6 1.5 0.15
 -6 14 5 8.46 0.57
 6 14 -5 9.08 0.57
 6 -14 -5 8.97 0.56
 6 -14 -5 8.88 0.57
 -6 -14 5 9.26 0.56
 -6 14 4 0.84 0.1
 6 -14 -4 0.93 0.1
 6 -14 -4 0.79 0.1
 -6 14 3 4.12 0.29
 6 14 -3 4.4 0.28
 6 14 -3 4.24 0.29
 6 -14 -3 4.05 0.29
 6 -14 -3 4.12 0.29
 -6 -14 3 4.32 0.29
 -6 14 2 0.02 0.02
 6 14 -2 0.26 0.08
 6 -14 -2 0.02 0.03
 6 -14 -2 0.03 0.03
 6 14 -1 3.35 0.24
 -6 14 1 3.21 0.23
 6 -14 -1 3.06 0.23
 6 -14 -1 3.29 0.24
 -6 14 0 3.05 0.22
 6 -14 0 3.04 0.23
 6 -14 0 3.35 0.24
 6 14 1 3.34 0.25
 -6 14 -1 3.34 0.24
 6 -14 1 3.47 0.26
 6 -14 1 3.58 0.25
 6 14 2 0.52 0.1
 -6 14 -2 0.42 0.07
 6 -14 2 0.45 0.1
 6 -14 2 0.5 0.1
 6 14 3 0.42 0.1
 6 -14 3 0.46 0.1
 6 -14 3 0.56 0.1
 6 14 4 0.32 0.1
 6 -14 4 0.25 0.1
 6 -14 4 0.2 0.1
 6 -14 5 0.19 0.11
 6 -14 5 0.15 0.11
 6 -14 6 -0.02 0.04
 6 -14 6 -0.06 0.04
 6 15 -11 0.01 0.06
 6 -15 -11 0.16 0.12
 -6 15 10 0.12 0.1
 6 15 -10 0.16 0.11
 6 -15 -10 0.03 0.04
 6 -15 -10 -0.04 0.04
 6 15 -9 1.35 0.16
 -6 15 9 1.27 0.14
 6 -15 -9 1.01 0.14
 6 -15 -9 1.31 0.16
 6 15 -8 0.42 0.11
 -6 15 8 0.52 0.1
 6 -15 -8 0.56 0.12
 6 -15 -8 0.4 0.1
 -6 15 7 0.38 0.09
 6 15 -7 0.59 0.1
 6 -15 -7 0.36 0.1
 6 -15 -7 0.31 0.09
 6 15 -6 1.48 0.14
 -6 15 6 1.54 0.14
 6 -15 -6 1.44 0.15
 6 -15 -6 1.34 0.14
 -6 15 5 0.44 0.09
 6 15 -5 0.49 0.08
 6 -15 -5 0.49 0.09
 -6 -15 5 0.4 0.08
 6 -15 -5 0.42 0.09
 -6 15 4 1.84 0.15
 6 15 -4 1.56 0.13
 -6 -15 4 1.72 0.14
 6 -15 -4 1.51 0.14
 6 -15 -4 1.63 0.15
 6 15 -3 4.3 0.26
 -6 15 3 3.21 0.25
 6 -15 -3 3.19 0.25
 6 -15 -3 2.91 0.25
 -6 -15 3 4.08 0.25
 6 15 -2 0.71 0.1
 -6 15 2 0.66 0.09
 6 -15 -2 0.62 0.09
 6 -15 -2 0.77 0.1
 6 15 -1 0.63 0.1
 -6 15 1 0.67 0.09
 6 -15 -1 0.66 0.09
 6 -15 -1 0.56 0.1
 -6 15 0 3.64 0.25
 6 15 0 3.54 0.26
 6 -15 0 3.55 0.26
 6 -15 0 3.49 0.26
 6 15 1 0.22 0.09
 -6 15 -1 0.38 0.07
 6 -15 1 0.43 0.09
 6 -15 1 0.46 0.09
 6 15 2 -0.01 0.02
 6 -15 2 -0.01 0.03
 6 -15 2 0 0.03
 6 15 3 0.49 0.11
 6 -15 3 0.71 0.12
 6 -15 3 0.48 0.11
 6 15 4 0.15 0.1
 6 -15 4 0.05 0.04
 6 -15 4 0.03 0.04
 6 15 5 0.13 0.1
 6 -15 5 0.16 0.13
 6 -15 5 0.08 0.05
 6 -15 6 -0.04 0.04
 6 -15 6 0 0.04
 6 16 -10 0.04 0.05
 -6 16 10 0.16 0.09
 6 -16 -10 0.02 0.05
 6 16 -9 1.69 0.18
 -6 16 9 1.66 0.16
 6 -16 -9 1.45 0.16
 6 -16 -9 1.7 0.18
 6 16 -8 1.43 0.17
 -6 16 8 2.12 0.18
 6 -16 -8 1.99 0.17
 6 -16 -8 1.96 0.19
 -6 16 7 0.54 0.11
 6 16 -7 0.44 0.09
 6 -16 -7 0.64 0.12
 6 -16 -7 0.53 0.1
 -6 16 6 1.47 0.14
 6 16 -6 0.98 0.12
 6 -16 -6 1.5 0.15
 6 -16 -6 1.31 0.13
 -6 16 5 4.87 0.32
 6 -16 -5 4.53 0.32
 -6 -16 5 4.92 0.31
 6 -16 -5 4.26 0.32
 -6 16 4 4.81 0.32
 6 16 -4 4.18 0.31
 -6 -16 4 4.47 0.31
 6 -16 -4 4.86 0.32
 6 -16 -4 4.66 0.31
 6 16 -3 0.01 0.02
 -6 16 3 -0.01 0.02
 -6 -16 3 0.1 0.07
 6 -16 -3 0.01 0.03
 6 -16 -3 0 0.03
 -6 16 2 6.29 0.41
 6 16 -2 5.81 0.41
 6 -16 -2 6.13 0.41
 6 -16 -2 6.45 0.41
 6 16 -1 2.07 0.18
 -6 16 1 2.22 0.17
 6 -16 -1 2.07 0.17
 6 -16 -1 2.07 0.18
 -6 16 0 -0.01 0.01
 6 16 0 0.1 0.08
 6 -16 0 0.12 0.07
 6 -16 0 0.03 0.03
 -6 16 -1 0.01 0.01
 6 16 1 0.01 0.02
 6 -16 1 0.02 0.03
 6 -16 1 0.18 0.09
 6 16 2 0.26 0.1
 6 -16 2 0.11 0.08
 6 -16 2 0.05 0.04
 6 16 3 1.68 0.17
 6 -16 3 1.84 0.18
 6 -16 3 1.47 0.17
 6 16 4 0.03 0.03
 6 -16 4 0.03 0.04
 6 -16 4 0.06 0.04
 6 16 5 0.02 0.02
 6 -16 5 0.01 0.05
 6 -16 5 0.04 0.05
 6 16 6 0.22 0.11
 6 -16 6 0.02 0.05
 6 -16 6 0.01 0.04
 -6 17 10 0.37 0.11
 6 17 -10 0.32 0.13
 6 -17 -10 0.09 0.05
 6 17 -9 1.44 0.17
 -6 17 9 1.62 0.17
 6 -17 -9 1.74 0.18
 6 17 -8 0.33 0.1
 -6 17 8 0.46 0.11
 6 -17 -8 0.36 0.1
 6 -17 -8 0.36 0.11
 -6 17 7 1.85 0.17
 6 -17 -7 1.86 0.18
 6 -17 -7 1.79 0.16
 6 -17 -6 0.14 0.09
 6 -17 -6 0.13 0.07
 -6 17 5 1.09 0.12
 6 -17 -5 1.02 0.13
 -6 -17 5 0.81 0.1
 6 -17 -5 0.8 0.11
 6 17 -4 0.04 0.02
 -6 17 4 0.25 0.09
 6 -17 -4 0.11 0.08
 -6 -17 4 0.09 0.07
 6 -17 -4 0.1 0.07
 -6 17 3 0.92 0.11
 6 17 -3 1.12 0.12
 6 -17 -3 0.81 0.1
 6 -17 -3 0.75 0.11
 6 17 -2 0.12 0.08
 -6 17 2 0.12 0.07
 6 -17 -2 0.12 0.08
 6 -17 -2 0.05 0.03
 -6 17 1 0.89 0.1
 6 17 -1 0.5 0.1
 6 -17 -1 0.74 0.09
 6 -17 -1 0.75 0.11
 -6 17 0 0.01 0.02
 6 17 0 0 0.02
 6 -17 0 0.02 0.03
 6 -17 0 0.01 0.03
 6 17 1 0.03 0.02
 -6 17 -1 0.02 0.02
 6 -17 1 0.17 0.08
 6 -17 1 0.02 0.03
 6 17 2 0.9 0.12
 6 -17 2 0.94 0.12
 6 -17 2 0.94 0.13
 6 -17 3 0.14 0.11
 6 -17 3 0.46 0.11
 6 17 4 0.05 0.03
 6 -17 4 0.17 0.12
 6 -17 4 -0.01 0.04
 6 17 5 0.01 0.03
 6 -17 5 0.02 0.05
 6 -17 5 0.02 0.05
 -6 18 10 0.27 0.1
 6 -18 -10 0.19 0.12
 -6 18 9 0.24 0.11
 6 -18 -9 0.3 0.12
 -6 18 8 0.03 0.02
 6 -18 -8 0.07 0.05
 -6 18 7 1.56 0.17
 6 -18 -7 1.6 0.17
 -6 18 6 0.46 0.1
 6 -18 -6 0.38 0.08
 6 -18 -6 0.33 0.11
 -6 18 5 0 0.02
 6 -18 -5 -0.03 0.03
 6 -18 -5 -0.01 0.02
 -6 -18 5 -0.03 0.01
 -6 18 4 1.21 0.12
 6 18 -4 0.76 0.11
 6 -18 -4 0.9 0.12
 6 -18 -4 0.99 0.11
 -6 -18 4 0.78 0.11
 -6 18 3 5.58 0.36
 6 18 -3 5.55 0.36
 6 -18 -3 4.97 0.36
 6 -18 -3 5.11 0.36
 -6 18 2 0.5 0.09
 6 18 -2 0.65 0.1
 6 -18 -2 0.28 0.09
 6 -18 -2 0.36 0.08
 6 18 -1 0.5 0.1
 -6 18 1 0.56 0.09
 6 -18 -1 0.6 0.1
 6 -18 -1 0.56 0.09
 -6 18 0 0.33 0.08
 6 18 0 0.67 0.1
 6 -18 0 0.45 0.1
 6 -18 0 0.41 0.08
 -6 18 -1 1.31 0.13
 6 18 1 1.36 0.15
 6 -18 1 1.47 0.14
 6 -18 1 1.37 0.15
 6 18 2 0.15 0.1
 6 -18 2 0.15 0.1
 6 -18 2 0.15 0.09
 6 18 3 0.28 0.11
 6 -18 3 0.29 0.11
 6 -18 3 0.29 0.11
 6 18 4 0.26 0.11
 6 -18 4 0.08 0.05
 6 -18 4 0.16 0.12
 6 18 5 0.02 0.03
 6 -18 5 0.01 0.04
 6 -18 5 0.03 0.05
 -6 19 10 0.31 0.11
 6 -19 -10 0.15 0.12
 -6 19 9 0.15 0.11
 6 -19 -9 0.02 0.04
 -6 19 8 0.26 0.11
 6 -19 -8 0.44 0.12
 -6 19 7 1.66 0.17
 6 -19 -7 1.68 0.18
 -6 19 6 0.01 0.02
 6 -19 -6 0 0.04
 -6 19 5 -0.01 0.02
 6 -19 -5 0 0.02
 -6 -19 5 0.01 0.02
 6 -19 -5 0.04 0.03
 -6 19 4 0.33 0.09
 6 19 -4 0.29 0.08
 -6 -19 4 0.31 0.08
 6 -19 -4 0.12 0.09
 6 -19 -4 0.32 0.08
 6 19 -3 0.4 0.1
 -6 19 3 0.53 0.1
 6 -19 -3 0.34 0.09
 6 -19 -3 0.49 0.08
 6 19 -2 1.5 0.16
 -6 19 2 1.8 0.15
 6 -19 -2 1.53 0.14
 6 -19 -2 1.76 0.16
 -6 19 1 0.26 0.08
 6 19 -1 0.4 0.09
 6 -19 -1 0.27 0.07
 6 -19 -1 0.3 0.1
 6 19 0 1.06 0.13
 -6 19 0 0.96 0.11
 6 -19 0 0.99 0.13
 6 -19 0 0.99 0.11
 6 19 1 0.61 0.11
 -6 19 -1 0.43 0.08
 6 -19 1 0.43 0.11
 6 -19 1 0.38 0.09
 6 19 2 0.42 0.11
 6 -19 2 0.31 0.11
 6 -19 2 0.45 0.09
 6 19 3 0.24 0.12
 6 -19 3 0.26 0.11
 6 -19 3 0.44 0.12
 6 19 4 0.3 0.12
 6 -19 4 0.29 0.12
 6 -19 4 0.36 0.12
 6 19 5 0 0.03
 6 -19 5 0.03 0.05
 6 -19 5 0.05 0.05
 -6 20 9 0.24 0.11
 6 -20 -9 0.07 0.05
 -6 20 8 0.16 0.11
 6 -20 -8 0.08 0.05
 6 -20 -7 0.14 0.11
 -6 20 6 1.58 0.16
 6 -20 -6 1.19 0.16
 -6 20 5 0.86 0.13
 6 -20 -5 0.73 0.12
 -6 -20 5 0.75 0.1
 6 20 -4 0.28 0.08
 -6 -20 4 0.17 0.08
 6 -20 -4 0.22 0.1
 6 20 -3 0.04 0.02
 -6 20 3 0.2 0.09
 6 -20 -3 0.04 0.03
 6 -20 -3 0.05 0.03
 -6 20 2 -0.02 0.02
 6 20 -2 0.03 0.02
 6 -20 -2 0 0.03
 6 -20 -2 0.01 0.03
 6 20 -1 0.03 0.02
 -6 20 1 0.03 0.02
 6 -20 -1 0.02 0.03
 6 -20 -1 0.01 0.03
 -6 20 0 -0.01 0.02
 6 20 0 0.13 0.1
 6 -20 0 0 0.03
 6 -20 0 -0.01 0.03
 6 20 1 0.43 0.11
 -6 20 -1 0.32 0.09
 6 -20 1 0.32 0.09
 6 -20 1 0.46 0.11
 6 20 2 0.02 0.02
 6 -20 2 0.05 0.04
 6 -20 2 0 0.03
 6 20 3 0.27 0.12
 6 -20 3 0.05 0.04
 6 -20 3 0.17 0.11
 6 20 4 0.18 0.12
 6 -20 4 -0.04 0.04
 6 -20 4 0.14 0.11
 6 20 5 0 0.03
 6 -20 5 0.03 0.05
 6 -20 5 -0.03 0.04
 -6 21 9 1.22 0.16
 6 -21 -9 1.05 0.16
 -6 21 8 0.04 0.03
 6 -21 -8 0.02 0.04
 -6 21 7 0.03 0.03
 6 -21 -7 0.05 0.04
 -6 21 6 0.7 0.13
 6 -21 -6 0.7 0.13
 -6 21 5 3.69 0.28
 6 -21 -5 3.57 0.28
 -6 21 4 0.37 0.1
 6 21 -4 0.44 0.09
 -6 -21 4 0.44 0.09
 6 -21 -4 0.23 0.1
 6 21 -3 0.11 0.08
 -6 21 3 0.03 0.02
 6 -21 -3 0.14 0.09
 6 21 -2 0.2 0.09
 6 -21 -2 0.12 0.09
 -6 21 1 0.02 0.02
 6 21 -1 0.15 0.09
 6 -21 -1 0.02 0.03
 6 -21 -1 0.01 0.03
 6 21 0 0.14 0.1
 -6 21 0 0.11 0.08
 6 -21 0 0.26 0.1
 6 -21 0 0.06 0.04
 6 21 1 0.41 0.12
 -6 21 -1 0.38 0.1
 6 -21 1 0.48 0.09
 6 -21 1 0.59 0.12
 6 21 2 0.01 0.03
 6 -21 2 -0.02 0.03
 6 -21 2 0.03 0.04
 6 21 3 0.23 0.13
 6 -21 3 0.03 0.04
 6 -21 3 0.02 0.04
 6 21 4 0.01 0.03
 6 -21 4 0 0.04
 6 -21 4 0.03 0.05
 -6 22 9 0.21 0.12
 6 -22 -9 0.24 0.12
 -6 22 8 0.06 0.03
 6 -22 -8 0.14 0.11
 -6 22 7 -0.01 0.02
 6 -22 -7 -0.06 0.03
 -6 22 6 0.57 0.12
 6 -22 -6 0.47 0.12
 -6 22 5 0.6 0.12
 6 22 -5 0.63 0.11
 6 -22 -5 0.73 0.12
 -6 22 4 0.24 0.11
 6 22 -4 0.3 0.09
 6 -22 -4 0.16 0.11
 -6 22 3 0.04 0.02
 6 22 -3 0.12 0.09
 6 -22 -3 0.2 0.1
 6 22 -2 0.29 0.1
 -6 22 2 0.02 0.02
 6 -22 -2 0.04 0.04
 6 22 -1 2.1 0.2
 -6 22 1 2.1 0.18
 6 -22 -1 1.88 0.19
 6 22 0 0.52 0.12
 -6 22 0 0.21 0.09
 6 -22 0 0.32 0.11
 6 -22 1 0.23 0.12
 6 22 2 0.84 0.15
 6 -22 2 0.58 0.13
 6 -22 2 0.67 0.11
 6 22 3 1.12 0.16
 6 -22 3 1.39 0.16
 6 -22 3 1.12 0.17
 6 22 4 0.16 0.12
 6 -22 4 -0.04 0.04
 6 -22 4 0.17 0.12
 -6 23 8 0.48 0.13
 6 -23 -8 0.35 0.12
 -6 23 7 0.89 0.15
 6 -23 -7 0.92 0.15
 -6 23 6 0.6 0.12
 6 -23 -6 0.49 0.12
 -6 23 5 0.3 0.11
 6 -23 -5 0.28 0.11
 -6 23 4 2.43 0.21
 6 23 -4 2.05 0.19
 6 -23 -4 2.18 0.21
 -6 23 3 0.16 0.11
 6 23 -3 0.45 0.1
 6 -23 -3 0.37 0.11
 6 23 -2 0.62 0.12
 -6 23 2 0.5 0.12
 6 -23 -2 0.5 0.11
 -6 23 1 1.25 0.14
 6 23 -1 0.99 0.15
 6 -23 -1 1.47 0.16
 -6 23 0 0.26 0.09
 6 23 0 0.25 0.11
 6 -23 0 0.31 0.11
 6 23 1 0.03 0.03
 6 -23 1 0.03 0.04
 6 23 2 0.84 0.14
 6 -23 2 0.55 0.14
 6 23 3 0.29 0.14
 6 -23 3 0.44 0.14
 6 23 4 0.79 0.15
 6 -23 4 0.74 0.14
 6 -23 4 0.74 0.16
 -6 24 8 0.96 0.15
 6 -24 -8 0.81 0.15
 -6 24 7 0.01 0.03
 6 -24 -7 -0.04 0.04
 -6 24 6 0.02 0.02
 6 -24 -6 0.13 0.1
 -6 24 5 0.23 0.11
 6 -24 -5 0.43 0.12
 -6 24 4 0.17 0.11
 6 24 -4 0.01 0.02
 6 -24 -4 0.02 0.04
 6 24 -3 0.13 0.1
 -6 24 3 0.28 0.11
 6 -24 -3 0.31 0.12
 -6 24 2 1.02 0.15
 6 24 -2 1.36 0.16
 6 -24 -2 1.14 0.15
 -6 24 1 0.26 0.09
 6 -24 -1 0.17 0.11
 6 24 0 1.44 0.16
 -6 24 0 0.94 0.13
 6 -24 0 1.14 0.15
 6 24 1 0.93 0.16
 6 -24 1 1.07 0.16
 6 24 2 0.3 0.14
 6 -24 2 0.16 0.13
 6 -24 3 0.22 0.13
 -6 25 7 0.34 0.13
 6 -25 -7 0.18 0.12
 -6 25 6 0.93 0.15
 6 -25 -6 0.61 0.14
 -6 25 5 0.5 0.13
 6 -25 -5 0.44 0.12
 -6 25 4 0.01 0.03
 6 25 -4 0.01 0.02
 6 -25 -4 -0.03 0.04
 -6 25 3 0.19 0.11
 6 25 -3 0.46 0.11
 6 -25 -3 0.22 0.12
 6 25 -2 0.53 0.13
 -6 25 2 0.36 0.12
 6 -25 -2 0.57 0.13
 6 25 -1 0.29 0.12
 -6 25 1 0 0.02
 6 -25 -1 0.02 0.04
 -6 25 0 0.42 0.11
 6 25 0 0.46 0.14
 6 -25 0 0.49 0.13
 6 25 1 0.04 0.03
 6 -25 1 0.03 0.04
 6 25 2 0.33 0.14
 6 -25 2 0.27 0.12
 6 25 3 0.28 0.14
 6 -25 3 0.09 0.05
 -6 26 7 0.47 0.13
 -6 26 6 0.28 0.13
 6 -26 -6 0.24 0.12
 -6 26 5 -0.01 0.03
 6 -26 -5 0.04 0.04
 6 26 -4 0.57 0.12
 6 -26 -4 0.29 0.12
 6 26 -3 0.39 0.12
 -6 26 3 0.5 0.12
 6 -26 -3 0.43 0.13
 -6 26 2 0.21 0.12
 6 26 -2 0.38 0.11
 6 -26 -2 0.27 0.12
 -6 26 1 0.28 0.12
 6 26 -1 0.39 0.13
 6 -26 -1 0.49 0.13
 6 26 0 0.24 0.13
 -6 26 0 0.16 0.1
 6 -26 0 0.22 0.12
 6 26 1 0.01 0.03
 6 -26 1 -0.05 0.04
 6 26 2 0.23 0.14
 6 -26 2 0.06 0.05
 -6 27 6 0.3 0.13
 6 -27 -6 0.21 0.13
 -6 27 5 0.64 0.14
 6 -27 -5 0.57 0.14
 -6 27 4 1.63 0.18
 6 27 -4 1.65 0.17
 6 -27 -4 1.63 0.18
 6 27 -3 0.35 0.12
 -6 27 3 0.41 0.13
 6 -27 -3 0.31 0.12
 -6 27 2 0.53 0.13
 6 27 -2 0.54 0.12
 6 -27 -2 0.7 0.13
 6 27 -1 0.2 0.13
 -6 27 1 0.02 0.03
 6 -27 -1 0.03 0.05
 6 27 0 0.23 0.13
 6 -27 0 0.3 0.12
 6 27 1 0.24 0.12
 6 -27 1 0.04 0.05
 6 27 2 0.02 0.03
 6 -27 2 0.04 0.05
 -6 28 5 0.18 0.12
 6 -28 -5 0 0.04
 -6 28 4 0.42 0.14
 6 -28 -4 0.49 0.14
 -6 28 3 0.22 0.13
 6 28 -3 0.52 0.12
 6 -28 -3 0.43 0.13
 -6 28 2 0.2 0.12
 6 28 -2 0.14 0.11
 6 -28 -2 0.05 0.05
 6 28 -1 0.01 0.03
 -6 28 1 0.02 0.03
 6 -28 -1 -0.02 0.04
 6 28 0 0.43 0.14
 6 -28 0 0.24 0.12
 6 28 1 -0.01 0.03
 6 -28 1 -0.01 0.05
 -6 29 4 -0.01 0.03
 6 -29 -4 0.01 0.04
 6 29 -3 0.66 0.13
 -6 29 3 0.77 0.14
 6 -29 -3 0.47 0.13
 6 29 -2 0.37 0.12
 -6 29 2 0.34 0.13
 6 -29 -2 0.22 0.13
 -6 29 1 1.16 0.16
 6 29 -1 0.94 0.17
 6 -29 -1 1.07 0.16
 6 29 0 0.05 0.03
 6 -29 0 0.03 0.04
 7 0 -12 0.54 0.16
 7 0 -12 0.39 0.12
 7 0 -11 0.23 0.13
 7 0 -10 0.99 0.13
 7 0 -10 1.4 0.17
 7 0 -9 0.01 0.03
 7 0 -9 0.02 0.04
 7 0 -8 0.06 0.03
 7 0 -8 0.08 0.04
 -7 0 8 0.02 0.02
 7 0 -7 0.24 0.07
 -7 0 6 3.87 0.26
 7 0 -6 3.69 0.27
 7 0 -6 3.77 0.25
 7 0 -5 -0.01 0.03
 7 0 -5 0.02 0.02
 -7 0 5 -0.01 0.01
 -7 0 4 7.92 0.51
 7 0 -4 8.2 0.48
 -7 0 3 -0.02 0.01
 7 0 -3 0 0.02
 7 0 -3 0.01 0.02
 -7 0 2 7.44 0.48
 7 0 -2 7.54 0.49
 7 0 -2 7.7 0.45
 7 0 -1 0.08 0.05
 -7 0 1 0 0.02
 7 0 -1 0.01 0.03
 -7 0 0 1.12 0.13
 7 0 0 1.41 0.11
 7 0 0 1.45 0.14
 -7 0 -1 -0.01 0.02
 7 0 1 0.03 0.03
 7 0 1 0.02 0.02
 7 0 2 11.95 0.76
 7 0 2 11.75 0.71
 -7 0 -2 11.89 0.73
 -7 0 -3 0.02 0.02
 7 0 3 -0.01 0.03
 7 0 3 0.02 0.03
 7 0 4 2.27 0.19
 7 0 4 1.89 0.17
 7 0 5 0 0.03
 7 0 5 0.02 0.04
 7 0 6 0 0.04
 7 0 6 0.06 0.05
 7 1 -12 -0.03 0.05
 7 -1 -12 0.01 0.04
 7 -1 -12 0.21 0.14
 7 1 -11 1.39 0.15
 7 1 -11 1.88 0.21
 7 -1 -11 1.39 0.16
 7 -1 -11 1.36 0.2
 7 1 -10 0.1 0.08
 7 1 -10 0 0.05
 7 -1 -10 0.02 0.05
 7 -1 -10 0 0.03
 7 1 -9 0.11 0.07
 7 1 -9 0.17 0.1
 7 -1 -9 0.19 0.1
 7 -1 -9 0.04 0.03
 7 1 -8 1.1 0.14
 7 1 -8 1.02 0.11
 -7 1 8 1.07 0.11
 7 -1 -8 1.17 0.11
 7 -1 -8 0.9 0.13
 -7 -1 8 1.02 0.1
 7 1 -7 11.16 0.79
 -7 1 7 13.62 0.77
 7 1 -7 12.08 0.75
 7 -1 -7 13.11 0.8
 -7 -1 7 11.67 0.77
 7 -1 -7 13.72 0.75
 7 1 -6 1.46 0.15
 -7 1 6 1.76 0.14
 7 1 -6 1.7 0.13
 7 -1 -6 1.59 0.15
 -7 -1 6 1.62 0.14
 7 -1 -6 1.67 0.13
 7 1 -5 0.47 0.06
 7 1 -5 0.53 0.08
 -7 1 5 0.27 0.07
 7 -1 -5 0.24 0.06
 -7 -1 5 0.5 0.07
 7 -1 -5 0.22 0.08
 -7 1 4 2.34 0.18
 7 1 -4 2.55 0.16
 7 -1 -4 2.39 0.19
 7 -1 -4 2.62 0.17
 -7 -1 4 2.47 0.19
 -7 1 3 2.06 0.17
 7 1 -3 2.42 0.15
 7 1 -3 2.36 0.18
 -7 -1 3 1.95 0.17
 7 -1 -3 2.1 0.18
 7 -1 -3 2.35 0.15
 7 1 -2 0.03 0.03
 7 1 -2 0.12 0.04
 -7 1 2 -0.01 0.02
 7 -1 -2 0.02 0.02
 -7 -1 2 -0.03 0.02
 7 -1 -2 0.18 0.07
 7 1 -1 1.08 0.13
 -7 1 1 1.63 0.13
 7 1 -1 1.18 0.1
 7 -1 -1 1.61 0.11
 -7 -1 1 1.1 0.12
 7 -1 -1 1.61 0.14
 7 1 0 9.11 0.62
 -7 1 0 9.61 0.6
 7 1 0 10.08 0.58
 7 -1 0 9.44 0.62
 -7 -1 0 9.63 0.61
 7 -1 0 9.97 0.58
 7 1 1 0.23 0.06
 7 1 1 0.32 0.09
 -7 1 -1 0.1 0.08
 7 -1 1 0.1 0.08
 7 -1 1 0.19 0.07
 -7 -1 -1 0.2 0.08
 -7 1 -2 0.77 0.11
 7 1 2 0.89 0.1
 7 1 2 0.89 0.12
 7 -1 2 0.63 0.09
 7 -1 2 1.13 0.13
 -7 -1 -2 0.94 0.11
 -7 1 -3 0.2 0.07
 7 1 3 0.12 0.08
 7 1 3 0.21 0.07
 7 -1 3 0.15 0.07
 7 -1 3 0.27 0.09
 -7 -1 -3 0.21 0.08
 7 1 4 1.22 0.14
 7 1 4 1.04 0.12
 7 -1 4 1.1 0.12
 -7 -1 -4 1.15 0.13
 7 -1 4 1.21 0.14
 7 1 5 0.05 0.05
 7 1 5 0.14 0.09
 7 -1 5 0.13 0.09
 7 -1 5 0.08 0.05
 7 1 6 0.04 0.05
 7 1 6 0 0.04
 7 -1 6 -0.02 0.04
 7 -1 6 -0.01 0.03
 7 2 -12 0.32 0.16
 7 -2 -12 0.14 0.11
 7 -2 -12 0.26 0.14
 7 2 -11 0.47 0.14
 7 -2 -11 0.53 0.12
 7 -2 -11 0.51 0.16
 7 2 -10 0.09 0.05
 7 -2 -10 0.16 0.11
 7 -2 -10 -0.02 0.03
 7 2 -9 0.19 0.1
 7 2 -9 0.1 0.07
 7 -2 -9 0.03 0.04
 7 -2 -9 0.13 0.08
 7 2 -8 0.44 0.08
 -7 2 8 0.49 0.08
 7 2 -8 0.43 0.11
 7 -2 -8 0.51 0.09
 -7 -2 8 0.42 0.07
 7 -2 -8 0.59 0.11
 7 2 -7 2.6 0.19
 7 2 -7 2.69 0.22
 -7 2 7 2.81 0.2
 -7 -2 7 2.67 0.2
 7 -2 -7 2.57 0.22
 7 -2 -7 3.01 0.2
 7 2 -6 15.13 0.87
 -7 2 6 14.88 0.9
 7 2 -6 14.1 0.93
 7 -2 -6 14.57 0.93
 7 -2 -6 15.13 0.87
 -7 -2 6 14.83 0.9
 -7 2 5 1.03 0.11
 7 2 -5 1.16 0.09
 7 2 -5 1.13 0.12
 7 -2 -5 1.22 0.1
 7 -2 -5 1.21 0.12
 -7 -2 5 1.04 0.11
 7 2 -4 7.16 0.4
 7 2 -4 6.92 0.44
 -7 2 4 6.19 0.42
 7 -2 -4 6.26 0.4
 7 -2 -4 6.35 0.44
 -7 -2 4 6.99 0.43
 -7 2 3 14.5 0.87
 7 2 -3 13.87 0.89
 7 -2 -3 13.66 0.89
 7 -2 -3 14.77 0.84
 -7 -2 3 14.29 0.87
 -7 2 2 22.5 1.33
 7 -2 -2 22.44 1.28
 7 -2 -2 21.26 1.36
 7 2 -1 0.01 0.02
 7 2 -1 -0.03 0.03
 -7 2 1 0.01 0.02
 7 -2 -1 0.02 0.03
 -7 -2 1 0.27 0.08
 7 -2 -1 -0.04 0.02
 7 2 0 26.6 1.7
 7 2 0 28.37 1.61
 -7 2 0 28.78 1.67
 7 -2 0 27.17 1.7
 -7 -2 0 27.58 1.67
 7 -2 0 28.33 1.61
 -7 2 -1 2.89 0.21
 7 2 1 2.65 0.22
 7 2 1 2.95 0.19
 7 -2 1 2.65 0.22
 7 -2 1 2.77 0.2
 -7 -2 -1 3.01 0.21
 7 2 2 0.53 0.1
 7 2 2 0.49 0.07
 7 -2 2 0.27 0.08
 7 -2 2 0.24 0.09
 7 2 3 0.04 0.04
 7 2 3 0 0.02
 -7 2 -3 -0.01 0.01
 7 -2 3 0 0.02
 -7 -2 -3 0 0.02
 7 -2 3 0.01 0.03
 7 2 4 0.54 0.09
 7 2 4 0.53 0.11
 7 -2 4 0.82 0.11
 -7 -2 -4 0.65 0.1
 7 -2 4 0.84 0.12
 7 2 5 0.03 0.04
 7 2 5 0.01 0.03
 7 -2 5 0.15 0.11
 7 -2 5 0.02 0.03
 7 2 6 0.02 0.04
 7 -2 6 -0.08 0.04
 7 -2 6 -0.01 0.04
 7 3 -12 0.02 0.06
 7 -3 -12 -0.02 0.06
 7 -3 -12 -0.02 0.04
 7 3 -11 0.38 0.14
 7 -3 -11 0.43 0.14
 7 -3 -11 0.17 0.1
 7 3 -10 0.3 0.13
 7 -3 -10 0.3 0.1
 7 -3 -10 0.43 0.13
 7 3 -9 0.32 0.12
 7 -3 -9 0.2 0.08
 7 -3 -9 0.17 0.1
 -7 3 8 0.75 0.09
 7 3 -8 0.75 0.12
 7 -3 -8 0.79 0.1
 -7 -3 8 0.77 0.09
 7 -3 -8 0.79 0.12
 7 3 -7 0.27 0.09
 -7 3 7 0.26 0.08
 7 -3 -7 0.44 0.08
 7 -3 -7 0.32 0.09
 -7 -3 7 0.2 0.07
 7 3 -6 0.36 0.09
 -7 3 6 0.46 0.08
 -7 -3 6 0.54 0.08
 7 -3 -6 0.48 0.09
 7 -3 -6 0.41 0.07
 7 3 -5 0.48 0.09
 -7 -3 5 0.49 0.08
 7 -3 -5 0.58 0.07
 7 -3 -5 0.52 0.09
 7 3 -4 2.08 0.17
 -7 3 4 2.17 0.17
 -7 -3 4 2.3 0.17
 7 -3 -4 2.07 0.18
 7 -3 -4 2.28 0.16
 -7 3 3 5.48 0.37
 7 -3 -3 5.7 0.35
 7 -3 -3 5.49 0.38
 7 3 -2 41.2 2.55
 -7 3 2 40.63 2.5
 7 -3 -2 41.66 2.55
 -7 -3 2 43.77 2.5
 7 -3 -2 43.1 2.42
 7 3 -1 2.48 0.18
 -7 3 1 2.03 0.17
 7 -3 -1 1.97 0.16
 7 -3 -1 2.07 0.18
 -7 -3 1 2.62 0.18
 7 3 0 1.17 0.12
 -7 3 0 0.92 0.12
 -7 -3 0 1.13 0.12
 7 -3 0 1.26 0.11
 7 -3 0 1.12 0.12
 -7 3 -1 5.3 0.34
 7 -3 1 4.83 0.35
 7 -3 1 4.97 0.32
 -7 3 -2 10.52 0.65
 7 3 2 10.53 0.67
 7 -3 2 10.41 0.63
 -7 -3 -2 10.43 0.65
 7 -3 2 10.26 0.68
 7 3 3 0.17 0.08
 -7 -3 -3 0.17 0.08
 7 -3 3 0.02 0.04
 7 3 4 0.12 0.09
 7 -3 4 0.29 0.1
 -7 -3 -4 0.19 0.08
 7 3 5 0.05 0.04
 7 -3 5 0.04 0.03
 7 -3 5 0.03 0.05
 7 3 6 0.16 0.11
 7 -3 6 -0.02 0.04
 7 -3 6 0.06 0.05
 7 4 -12 0.66 0.16
 7 -4 -12 0.88 0.17
 7 -4 -12 0.52 0.14
 7 4 -11 0.2 0.14
 7 -4 -11 0.05 0.04
 7 -4 -11 0.02 0.05
 7 4 -10 0.23 0.12
 7 -4 -10 0.05 0.04
 7 -4 -10 0.03 0.05
 7 4 -9 0.1 0.05
 -7 4 9 0.18 0.07
 7 -4 -9 0.06 0.03
 7 -4 -9 0.05 0.05
 7 4 -8 1.59 0.15
 -7 4 8 1.31 0.12
 7 -4 -8 1.17 0.15
 7 -4 -8 1.24 0.13
 7 4 -7 2.33 0.2
 -7 4 7 2.34 0.18
 7 -4 -7 2.45 0.2
 7 -4 -7 2.41 0.18
 -7 -4 7 2.35 0.18
 7 4 -6 0.61 0.1
 -7 4 6 0.73 0.09
 -7 -4 6 0.77 0.09
 7 -4 -6 0.82 0.09
 7 -4 -6 0.55 0.1
 -7 4 5 0.3 0.07
 7 4 -5 0.35 0.08
 7 -4 -5 0.46 0.07
 -7 -4 5 0.37 0.07
 7 -4 -5 0.41 0.08
 7 4 -4 14.79 0.87
 -7 4 4 12.73 0.85
 -7 -4 4 15.76 0.85
 7 -4 -4 12.91 0.87
 7 -4 -4 13.37 0.82
 7 4 -3 0.26 0.08
 7 -4 -3 0.15 0.08
 -7 -4 3 0.24 0.07
 7 -4 -3 0.15 0.06
 -7 4 2 9.11 0.57
 7 4 -2 8.26 0.58
 7 -4 -2 9.68 0.55
 -7 -4 2 8.41 0.56
 7 -4 -2 9.74 0.59
 -7 4 1 2.67 0.2
 7 4 -1 2.58 0.21
 -7 -4 1 3.1 0.21
 7 -4 -1 2.56 0.19
 7 -4 -1 2.76 0.21
 7 4 0 0.82 0.1
 -7 4 0 0.33 0.09
 7 -4 0 0.6 0.1
 -7 -4 0 0.63 0.09
 7 -4 0 0.66 0.09
 7 4 1 3.32 0.25
 -7 4 -1 3.44 0.24
 7 -4 1 3.34 0.26
 7 -4 1 3.36 0.23
 -7 -4 -1 3.51 0.25
 -7 4 -2 0.21 0.08
 7 4 2 0.25 0.08
 7 -4 2 0.35 0.08
 -7 -4 -2 0.19 0.08
 7 -4 2 0.48 0.1
 -7 4 -3 0.25 0.07
 7 4 3 0.23 0.08
 7 -4 3 0.18 0.07
 -7 -4 -3 0.16 0.08
 7 -4 3 0.26 0.09
 7 4 4 0.11 0.09
 7 -4 4 0.01 0.04
 -7 -4 -4 0.15 0.08
 7 -4 4 0.03 0.03
 7 4 5 0 0.04
 7 -4 5 -0.02 0.04
 7 -4 5 0.02 0.03
 7 4 6 0.15 0.1
 7 -4 6 0.26 0.13
 7 -4 6 0.15 0.1
 7 5 -12 0.07 0.06
 7 -5 -12 0.02 0.06
 7 -5 -12 0.05 0.05
 7 5 -11 0.2 0.13
 7 -5 -11 0.15 0.11
 7 -5 -11 0.02 0.05
 7 5 -10 0.06 0.05
 7 -5 -10 0.25 0.1
 7 -5 -10 0.24 0.12
 -7 5 9 0.6 0.09
 7 5 -9 0.51 0.13
 7 -5 -9 0.78 0.13
 7 -5 -9 0.68 0.11
 -7 5 8 1.67 0.14
 7 5 -8 1.4 0.16
 7 -5 -8 1.72 0.17
 7 -5 -8 1.69 0.15
 -7 5 7 4.64 0.34
 7 5 -7 5.88 0.37
 7 -5 -7 4.59 0.36
 7 -5 -7 4.68 0.33
 -7 -5 7 6.09 0.34
 7 5 -6 -0.01 0.03
 -7 5 6 0 0.01
 -7 -5 6 0 0.01
 7 -5 -6 -0.01 0.03
 7 -5 -6 -0.01 0.02
 -7 5 5 0.79 0.1
 7 5 -5 1.03 0.11
 7 -5 -5 0.88 0.09
 -7 -5 5 0.97 0.1
 7 -5 -5 0.82 0.1
 7 5 -4 10.91 0.7
 -7 5 4 10.7 0.68
 7 -5 -4 10.84 0.7
 7 -5 -4 11.53 0.66
 -7 -5 4 11.3 0.68
 -7 5 3 1.77 0.15
 7 -5 -3 1.89 0.14
 7 -5 -3 1.9 0.16
 7 5 -2 7.66 0.5
 -7 5 2 7.79 0.49
 7 -5 -2 7.85 0.47
 7 -5 -2 7.26 0.5
 -7 -5 2 8 0.49
 -7 5 1 5.02 0.33
 7 -5 -1 4.67 0.34
 7 -5 -1 5.1 0.32
 7 5 0 11.23 0.72
 -7 5 0 11.89 0.71
 -7 -5 0 11.56 0.71
 7 -5 0 11.13 0.73
 7 -5 0 11.47 0.69
 -7 5 -1 3.94 0.27
 7 5 1 3.77 0.28
 -7 -5 -1 4.06 0.28
 7 -5 1 4.1 0.29
 7 -5 1 3.97 0.27
 -7 5 -2 0 0.02
 7 5 2 -0.03 0.03
 -7 -5 -2 0.02 0.02
 7 -5 2 0.02 0.03
 7 -5 2 0.01 0.03
 -7 5 -3 0.01 0.02
 7 5 3 0.17 0.09
 7 -5 3 0 0.03
 -7 -5 -3 0.03 0.02
 7 -5 3 -0.03 0.03
 7 5 4 0.54 0.11
 -7 -5 -4 0.5 0.09
 7 -5 4 0.62 0.12
 7 -5 4 0.67 0.11
 7 5 5 -0.01 0.04
 7 -5 5 0.01 0.03
 7 -5 5 -0.02 0.04
 7 5 6 0.26 0.1
 7 -5 6 0.2 0.11
 7 -5 6 0.06 0.05
 7 6 -11 0.19 0.14
 7 -6 -11 0.45 0.14
 7 -6 -11 0.29 0.12
 7 6 -10 1.11 0.17
 7 -6 -10 1.64 0.18
 7 -6 -10 1.43 0.15
 7 6 -9 0.66 0.12
 -7 6 9 0.49 0.09
 7 -6 -9 0.58 0.12
 7 -6 -9 0.7 0.11
 -7 6 8 0.27 0.07
 7 6 -8 0.37 0.1
 7 -6 -8 0.27 0.08
 7 -6 -8 0.29 0.09
 7 6 -7 1.58 0.15
 -7 6 7 1.55 0.14
 7 -6 -7 1.47 0.14
 7 -6 -7 1.53 0.15
 -7 -6 7 1.68 0.14
 -7 6 6 1.58 0.14
 7 6 -6 1.7 0.15
 7 -6 -6 1.42 0.13
 7 -6 -6 1.16 0.14
 -7 -6 6 1.85 0.14
 -7 6 5 0.58 0.08
 7 6 -5 0.55 0.09
 7 -6 -5 0.55 0.08
 -7 -6 5 0.65 0.09
 7 -6 -5 0.52 0.09
 -7 6 4 1.19 0.11
 7 6 -4 0.77 0.11
 7 -6 -4 1.3 0.1
 7 -6 -4 1.29 0.12
 -7 -6 4 0.8 0.1
 -7 6 3 9.51 0.61
 7 6 -3 9.73 0.62
 -7 -6 3 9.77 0.61
 7 -6 -3 9.62 0.63
 7 -6 -3 10.25 0.59
 7 6 -2 0.59 0.09
 -7 -6 2 0.55 0.08
 7 6 -1 9.03 0.57
 -7 6 1 8.85 0.56
 7 -6 -1 8.65 0.58
 7 -6 -1 8.83 0.54
 -7 -6 1 9.02 0.56
 -7 6 0 2.8 0.2
 7 6 0 2.11 0.19
 7 -6 0 3.19 0.2
 7 -6 0 2.8 0.21
 -7 -6 0 2.23 0.19
 7 6 1 0.5 0.09
 -7 6 -1 0.32 0.08
 7 -6 1 0.55 0.1
 -7 -6 -1 0.56 0.09
 7 -6 1 0.46 0.08
 -7 6 -2 1.38 0.13
 7 6 2 1.38 0.14
 7 -6 2 1.64 0.15
 -7 -6 -2 1.39 0.14
 7 -6 2 1.52 0.14
 7 6 3 0.46 0.09
 -7 -6 -3 0.39 0.09
 7 -6 3 0.48 0.09
 7 -6 3 0.44 0.1
 7 6 4 0.41 0.1
 -7 -6 -4 0.23 0.09
 7 -6 4 0.24 0.11
 7 -6 4 0.24 0.09
 7 6 5 -0.03 0.04
 7 -6 5 -0.01 0.03
 7 -6 5 0.22 0.11
 7 6 6 -0.03 0.04
 7 -6 6 0.01 0.05
 7 -6 6 0.03 0.04
 7 7 -11 0.68 0.16
 7 -7 -11 0.52 0.14
 7 -7 -11 0.7 0.13
 7 7 -10 0.77 0.14
 7 -7 -10 0.83 0.14
 7 -7 -10 0.6 0.12
 7 7 -9 0.08 0.05
 -7 7 9 0.09 0.07
 7 -7 -9 0.02 0.03
 7 -7 -9 0.08 0.05
 -7 7 8 0.01 0.02
 7 7 -8 0 0.04
 7 -7 -8 0.01 0.03
 7 -7 -8 -0.01 0.03
 -7 7 7 0.6 0.09
 7 7 -7 0.41 0.1
 -7 -7 7 0.34 0.07
 7 -7 -7 0.39 0.08
 7 -7 -7 0.54 0.11
 -7 7 6 7.49 0.49
 7 7 -6 7.39 0.5
 -7 -7 6 8.08 0.49
 7 -7 -6 7.61 0.51
 7 -7 -6 7.91 0.48
 -7 7 5 1.86 0.16
 7 -7 -5 1.94 0.17
 7 -7 -5 2.15 0.16
 7 7 -4 0.99 0.11
 -7 7 4 1.01 0.11
 7 -7 -4 1 0.11
 7 -7 -4 0.92 0.1
 -7 -7 4 1.15 0.11
 7 7 -3 4.87 0.36
 -7 7 3 5.57 0.36
 -7 -7 3 5.04 0.36
 7 -7 -3 6.06 0.35
 7 -7 -3 5.97 0.38
 7 7 -2 1.41 0.13
 -7 7 2 1.28 0.12
 -7 -7 2 1.33 0.13
 7 -7 -2 1.44 0.12
 7 -7 -2 1.35 0.13
 7 7 -1 0.72 0.09
 7 -7 -1 0.64 0.1
 7 -7 -1 0.8 0.09
 -7 -7 1 0.63 0.09
 7 7 0 1.91 0.16
 -7 7 0 1.72 0.16
 7 -7 0 1.81 0.15
 7 -7 0 2 0.17
 -7 -7 0 1.93 0.16
 -7 7 -1 0.69 0.1
 7 7 1 1.07 0.11
 7 -7 1 0.73 0.11
 7 -7 1 0.67 0.1
 -7 -7 -1 1.04 0.11
 -7 7 -2 0.57 0.09
 7 7 2 0.37 0.08
 -7 -7 -2 0.61 0.1
 7 -7 2 0.55 0.09
 7 -7 2 0.42 0.1
 7 7 3 0.13 0.08
 7 -7 3 0.26 0.08
 7 -7 3 0.18 0.09
 7 7 4 0.62 0.11
 -7 -7 -4 0.55 0.1
 7 -7 4 0.62 0.13
 7 -7 4 0.6 0.11
 7 7 5 0.02 0.04
 7 -7 5 -0.01 0.03
 7 -7 5 -0.03 0.04
 7 7 6 -0.01 0.04
 7 -7 6 -0.05 0.04
 7 -7 6 0.04 0.04
 7 8 -11 0.96 0.18
 7 -8 -11 1.1 0.16
 7 -8 -11 1.05 0.15
 7 8 -10 0.33 0.12
 7 -8 -10 0.13 0.1
 7 -8 -10 0.08 0.05
 7 8 -9 0.31 0.11
 -7 8 9 0.35 0.08
 7 -8 -9 0.34 0.1
 7 -8 -9 0.51 0.11
 -7 8 8 1.01 0.11
 7 8 -8 0.82 0.13
 7 -8 -8 1.06 0.12
 7 -8 -8 0.96 0.13
 7 8 -7 2.78 0.24
 -7 8 7 3.05 0.22
 7 -8 -7 3.25 0.24
 -7 -8 7 3.07 0.21
 7 -8 -7 2.97 0.22
 7 8 -6 1.26 0.14
 -7 8 6 1.38 0.13
 7 -8 -6 1.52 0.14
 7 -8 -6 1.72 0.15
 7 8 -5 7.18 0.49
 -7 8 5 7.53 0.48
 7 -8 -5 7.44 0.47
 7 -8 -5 7.45 0.49
 -7 -8 5 7.73 0.48
 7 8 -4 0.77 0.09
 -7 8 4 0.49 0.08
 7 -8 -4 0.43 0.08
 7 -8 -4 0.4 0.08
 -7 -8 4 0.65 0.08
 -7 8 3 0.12 0.06
 7 8 -3 0.31 0.07
 7 -8 -3 0.15 0.07
 7 -8 -3 0.13 0.06
 7 8 -2 0.3 0.07
 -7 -8 2 0.18 0.07
 7 -8 -2 0.17 0.06
 7 -8 -2 0.17 0.07
 -7 8 1 5.49 0.37
 7 8 -1 5.95 0.38
 7 -8 -1 5.81 0.36
 7 -8 -1 5.56 0.39
 -7 -8 1 5.61 0.38
 -7 8 0 2.91 0.23
 7 -8 0 3.47 0.23
 7 -8 0 3.54 0.25
 -7 8 -1 4.67 0.32
 7 8 1 4.59 0.32
 7 -8 1 4.88 0.34
 7 -8 1 4.77 0.32
 -7 -8 -1 4.77 0.32
 7 8 2 0.21 0.08
 -7 8 -2 0.24 0.07
 7 -8 2 0.52 0.09
 -7 -8 -2 0.23 0.08
 7 -8 2 0.32 0.09
 7 8 3 0.56 0.1
 7 -8 3 0.59 0.12
 -7 -8 -3 0.45 0.1
 7 -8 3 0.56 0.11
 7 8 4 0.12 0.09
 7 -8 4 0.17 0.11
 7 -8 4 0.17 0.09
 7 8 5 -0.01 0.04
 7 -8 5 0.04 0.05
 7 -8 5 0.05 0.04
 7 -8 6 0.05 0.05
 7 -8 6 0.04 0.04
 7 9 -11 0.07 0.06
 7 -9 -11 0.07 0.06
 7 -9 -11 0.07 0.05
 7 9 -10 0.02 0.05
 7 -9 -10 0 0.05
 7 -9 -10 -0.03 0.04
 7 9 -9 1.23 0.15
 -7 9 9 0.95 0.12
 7 -9 -9 1.23 0.15
 7 -9 -9 1.13 0.13
 7 9 -8 0.14 0.09
 -7 9 8 -0.01 0.02
 7 -9 -8 0 0.03
 7 -9 -8 0.04 0.04
 7 9 -7 0.06 0.04
 -7 9 7 0.11 0.07
 -7 -9 7 0.09 0.07
 7 -9 -7 0.27 0.08
 7 -9 -7 0.06 0.04
 7 9 -6 0.89 0.11
 -7 9 6 0.79 0.1
 7 -9 -6 0.83 0.1
 -7 -9 6 0.79 0.1
 7 -9 -6 0.89 0.12
 -7 9 5 0.18 0.07
 7 9 -5 0.19 0.08
 7 -9 -5 0.21 0.08
 -7 -9 5 0.17 0.07
 7 -9 -5 0.23 0.07
 -7 9 4 0.14 0.06
 7 9 -4 0.1 0.06
 -7 -9 4 0.02 0.02
 7 -9 -4 0.05 0.03
 7 -9 -4 0.02 0.03
 -7 9 3 0.92 0.1
 7 9 -3 0.88 0.1
 7 -9 -3 0.98 0.1
 7 -9 -3 0.91 0.11
 -7 -9 3 0.69 0.1
 7 9 -2 2.17 0.17
 -7 9 2 2.32 0.17
 7 -9 -2 2.21 0.17
 7 -9 -2 2.29 0.18
 -7 -9 2 2.02 0.17
 -7 9 1 1.44 0.13
 7 9 -1 1.21 0.13
 -7 -9 1 1.22 0.13
 7 -9 -1 1.84 0.15
 7 -9 -1 1.8 0.14
 7 9 0 1.99 0.17
 -7 9 0 2.15 0.17
 7 -9 0 2.18 0.18
 7 -9 0 2.38 0.18
 -7 -9 0 2.23 0.18
 -7 9 -1 1.16 0.11
 7 9 1 0.93 0.11
 -7 -9 -1 0.99 0.12
 7 -9 1 1.25 0.13
 7 -9 1 1.2 0.12
 7 9 2 0.58 0.09
 -7 9 -2 0.53 0.08
 7 -9 2 0.56 0.11
 -7 -9 -2 0.59 0.1
 7 -9 2 0.39 0.09
 7 9 3 0.17 0.08
 -7 -9 -3 0.18 0.09
 7 -9 3 0.13 0.1
 7 -9 3 0.22 0.09
 7 9 4 0.02 0.04
 7 -9 4 0.01 0.04
 -7 -9 -4 -0.01 0.02
 7 -9 4 0.04 0.04
 7 -9 5 0.21 0.11
 7 -9 5 0.11 0.06
 -7 -9 -5 0.13 0.09
 7 -9 6 0.59 0.14
 7 -9 6 0.81 0.14
 7 10 -11 0.21 0.14
 7 -10 -11 0.22 0.13
 7 10 -10 0.22 0.12
 7 -10 -10 0.05 0.05
 7 -10 -10 0.16 0.11
 7 10 -9 0.99 0.14
 -7 10 9 0.92 0.12
 7 -10 -9 1.13 0.15
 7 -10 -9 1.14 0.14
 7 10 -8 0.46 0.1
 -7 10 8 0.38 0.09
 7 -10 -8 0.45 0.1
 7 -10 -8 0.55 0.1
 7 10 -7 0.31 0.09
 -7 10 7 0.43 0.09
 7 -10 -7 0.33 0.1
 -7 -10 7 0.29 0.07
 7 -10 -7 0.33 0.09
 7 10 -6 1.88 0.18
 -7 10 6 2.42 0.18
 7 -10 -6 2.33 0.18
 7 -10 -6 2.43 0.19
 -7 -10 6 1.92 0.17
 7 10 -5 2.67 0.21
 -7 10 5 2.87 0.21
 7 -10 -5 3.02 0.22
 -7 -10 5 2.74 0.21
 7 -10 -5 2.85 0.21
 -7 10 4 4.95 0.33
 7 10 -4 4.27 0.32
 -7 -10 4 4.72 0.32
 7 -10 -4 5.12 0.34
 7 -10 -4 4.93 0.32
 7 10 -3 1.51 0.13
 -7 10 3 1.51 0.13
 -7 -10 3 1.25 0.13
 7 -10 -3 1.35 0.14
 7 -10 -3 1.46 0.13
 -7 10 2 5.46 0.33
 7 10 -2 3.96 0.32
 -7 -10 2 4.03 0.32
 7 -10 -2 5.27 0.32
 7 -10 -2 5.59 0.34
 7 10 -1 2.19 0.17
 -7 10 1 2.22 0.17
 -7 -10 1 2 0.17
 7 -10 -1 1.83 0.17
 7 -10 -1 2.04 0.17
 -7 10 0 0.01 0.02
 7 10 0 -0.01 0.02
 7 -10 0 0.11 0.07
 7 -10 0 0 0.02
 -7 -10 0 0 0.02
 7 10 1 1.64 0.14
 -7 10 -1 1.55 0.14
 7 -10 1 1.5 0.15
 -7 -10 -1 1.62 0.15
 7 -10 1 1.6 0.16
 7 10 2 0.19 0.08
 -7 10 -2 0.57 0.08
 7 -10 2 0.59 0.11
 7 -10 2 0.55 0.09
 -7 -10 -2 0.35 0.09
 7 10 3 1.98 0.18
 7 -10 3 2.25 0.21
 -7 -10 -3 2.41 0.2
 7 -10 3 2.31 0.2
 -7 -10 -4 2.14 0.2
 7 -10 4 2.5 0.22
 7 -10 4 2.21 0.2
 7 -10 5 0.27 0.12
 -7 -10 -5 0.23 0.1
 7 -10 5 0.36 0.11
 7 -10 6 0.04 0.05
 7 -10 6 0.05 0.04
 7 11 -11 0.17 0.13
 7 -11 -11 -0.02 0.04
 7 -11 -11 -0.03 0.04
 7 11 -10 0.08 0.06
 7 -11 -10 0.17 0.1
 7 -11 -10 0.2 0.11
 -7 11 9 0.33 0.09
 7 11 -9 0.34 0.12
 7 -11 -9 0.34 0.11
 7 -11 -9 0.43 0.11
 7 11 -8 1.08 0.13
 -7 11 8 0.83 0.12
 7 -11 -8 0.97 0.13
 7 -11 -8 0.81 0.13
 7 11 -7 3.36 0.26
 -7 11 7 3.27 0.25
 7 -11 -7 3.47 0.26
 7 -11 -7 3.39 0.25
 -7 11 6 0.84 0.11
 7 11 -6 0.79 0.11
 -7 -11 6 0.78 0.1
 7 -11 -6 0.74 0.11
 7 -11 -6 0.8 0.11
 -7 11 5 1.69 0.14
 7 11 -5 1.23 0.13
 7 -11 -5 1.61 0.14
 7 -11 -5 1.51 0.14
 -7 -11 5 1.13 0.12
 -7 11 4 0.3 0.07
 7 11 -4 0.2 0.07
 7 -11 -4 0.27 0.07
 -7 -11 4 0.16 0.08
 7 -11 -4 0.21 0.08
 7 11 -3 9.88 0.58
 -7 11 3 8.66 0.57
 -7 -11 3 9.74 0.57
 7 -11 -3 8.11 0.56
 7 -11 -3 8.77 0.58
 -7 11 2 0.24 0.07
 -7 -11 2 0.32 0.08
 7 -11 -2 0.25 0.08
 7 11 -1 8.82 0.57
 -7 11 1 9.04 0.56
 7 -11 -1 9.19 0.58
 -7 -11 1 8.48 0.56
 7 -11 -1 9 0.55
 7 11 0 0.01 0.02
 -7 11 0 0 0.02
 7 -11 0 0.09 0.07
 7 -11 0 0.02 0.03
 -7 -11 0 0.01 0.02
 7 11 1 0.85 0.11
 -7 11 -1 0.9 0.1
 7 11 1 0.92 0.12
 7 -11 1 1.13 0.12
 7 -11 1 1.11 0.13
 -7 -11 -1 0.98 0.12
 7 11 2 0.7 0.12
 -7 11 -2 0.61 0.09
 7 -11 2 0.49 0.1
 -7 -11 -2 0.8 0.12
 7 -11 2 0.65 0.11
 7 11 3 2.17 0.2
 -7 -11 -3 2.34 0.2
 7 -11 3 2.53 0.22
 7 -11 3 2.35 0.2
 7 -11 4 0.25 0.11
 7 -11 4 0.05 0.05
 -7 -11 -4 0.01 0.02
 7 -11 5 0.19 0.13
 -7 -11 -5 0.12 0.1
 7 -11 5 0.28 0.11
 7 -11 6 0.06 0.05
 7 -11 6 0.04 0.04
 7 12 -11 0.29 0.14
 7 -12 -11 0.17 0.11
 7 -12 -11 0.2 0.12
 -7 12 10 0.11 0.09
 7 12 -10 0.02 0.05
 7 -12 -10 0.06 0.05
 7 -12 -10 0.02 0.04
 7 12 -9 0.04 0.05
 7 -12 -9 0.21 0.11
 7 -12 -9 0.16 0.11
 -7 12 8 -0.01 0.02
 7 12 -8 -0.03 0.03
 7 -12 -8 -0.01 0.03
 7 -12 -8 0.12 0.08
 -7 12 7 0.01 0.02
 7 12 -7 0.01 0.03
 7 -12 -7 0 0.03
 7 -12 -7 0 0.03
 7 12 -6 0.16 0.07
 -7 12 6 0.14 0.08
 7 -12 -6 0.1 0.08
 -7 -12 6 0.11 0.07
 7 -12 -6 0.08 0.03
 7 12 -5 0.12 0.07
 -7 12 5 0.13 0.08
 7 -12 -5 0.15 0.08
 -7 -12 5 0.1 0.07
 7 -12 -5 0.11 0.07
 7 12 -4 0.18 0.07
 -7 12 4 0.19 0.07
 7 -12 -4 0.16 0.07
 -7 -12 4 0.16 0.07
 7 -12 -4 0.17 0.07
 -7 12 3 6.42 0.42
 7 12 -3 6.32 0.42
 -7 -12 3 6.36 0.42
 7 -12 -3 6.39 0.43
 7 -12 -3 6.54 0.41
 7 12 -2 3.74 0.23
 -7 12 2 3.02 0.23
 7 -12 -2 2.76 0.23
 7 -12 -2 2.7 0.23
 -7 -12 2 3.61 0.24
 7 12 -1 0.51 0.08
 -7 12 1 0.64 0.09
 -7 -12 1 0.61 0.09
 7 -12 -1 0.51 0.1
 7 -12 -1 0.69 0.1
 7 12 0 1.23 0.11
 7 12 0 1.22 0.13
 -7 12 0 0.76 0.11
 7 -12 0 1.08 0.12
 -7 -12 0 0.99 0.12
 7 -12 0 1.13 0.13
 7 12 1 1.37 0.14
 -7 12 -1 1.24 0.12
 7 -12 1 1.28 0.14
 7 -12 1 1.31 0.14
 -7 -12 -1 1.42 0.14
 -7 12 -2 0 0.01
 7 12 2 0 0.02
 7 -12 2 0.01 0.03
 7 -12 2 0.01 0.04
 -7 -12 -2 0.02 0.02
 7 12 3 0.23 0.11
 7 -12 3 0.24 0.1
 -7 -12 -3 0.19 0.1
 7 -12 3 0.23 0.1
 7 12 4 0.57 0.12
 -7 -12 -4 0.52 0.11
 7 -12 4 0.42 0.12
 7 -12 4 0.43 0.12
 7 -12 5 0.21 0.12
 7 -12 5 0.18 0.11
 7 13 -11 -0.01 0.05
 7 -13 -11 0.1 0.05
 7 -13 -11 -0.02 0.04
 -7 13 10 0.44 0.1
 7 13 -10 0.31 0.13
 7 -13 -10 0.55 0.12
 7 -13 -10 0.48 0.13
 -7 13 9 0.63 0.11
 7 13 -9 0.8 0.14
 7 -13 -9 0.78 0.13
 7 -13 -9 0.56 0.13
 -7 13 8 0 0.02
 7 13 -8 -0.02 0.03
 7 -13 -8 -0.02 0.04
 7 -13 -8 0.02 0.03
 -7 13 7 1.34 0.15
 7 13 -7 1.62 0.15
 7 -13 -7 1.42 0.15
 7 -13 -7 1.71 0.16
 -7 13 6 0.66 0.1
 7 13 -6 0.61 0.1
 7 -13 -6 0.75 0.11
 7 -13 -6 0.64 0.1
 -7 -13 6 0.62 0.09
 7 13 -5 3.52 0.23
 -7 13 5 2.7 0.22
 -7 -13 5 3.27 0.22
 7 -13 -5 2.79 0.22
 7 -13 -5 2.69 0.23
 7 13 -4 1.04 0.11
 -7 13 4 1.14 0.12
 7 -13 -4 1.18 0.13
 7 -13 -4 1.01 0.12
 -7 -13 4 1.01 0.11
 -7 13 3 2.5 0.19
 7 13 -3 2.32 0.18
 -7 -13 3 2.34 0.19
 7 -13 -3 2.47 0.19
 7 -13 -3 2.57 0.2
 -7 13 2 0.27 0.08
 7 13 -2 0.3 0.07
 -7 -13 2 0.25 0.08
 7 -13 -2 0.25 0.08
 7 -13 -2 0.32 0.08
 -7 13 1 0.11 0.07
 7 13 -1 0.19 0.08
 7 -13 -1 0.03 0.03
 -7 -13 1 0.19 0.09
 -7 13 0 0.44 0.08
 7 13 0 0.56 0.1
 -7 -13 0 0.47 0.09
 7 -13 0 0.49 0.1
 7 -13 0 0.52 0.1
 7 13 1 0.23 0.09
 -7 13 -1 0.21 0.07
 7 -13 1 0.33 0.09
 7 -13 1 0.3 0.09
 -7 -13 -1 0.27 0.09
 7 13 2 0.14 0.1
 7 -13 2 0.04 0.03
 -7 -13 -2 0.25 0.09
 7 -13 2 0.04 0.04
 7 13 3 0.14 0.1
 -7 -13 -3 0.04 0.03
 7 -13 3 0.05 0.04
 7 -13 3 0.19 0.11
 7 13 4 0.02 0.02
 7 -13 4 0.05 0.05
 -7 -13 -4 0.03 0.03
 7 -13 4 0.06 0.04
 7 -13 5 0.16 0.11
 7 -13 5 0.21 0.12
 7 14 -10 0.74 0.15
 -7 14 10 0.58 0.12
 7 -14 -10 0.72 0.14
 7 -14 -10 0.76 0.13
 7 14 -9 0.19 0.11
 7 -14 -9 0.13 0.1
 7 -14 -9 0.31 0.11
 7 14 -8 0.31 0.1
 -7 14 8 0.3 0.1
 7 -14 -8 0.39 0.11
 7 -14 -8 0.47 0.11
 7 14 -7 0.2 0.09
 -7 14 7 0.43 0.09
 7 -14 -7 0.31 0.09
 7 -14 -7 0.34 0.1
 -7 14 6 0.28 0.09
 7 14 -6 0.07 0.04
 -7 -14 6 0.18 0.07
 7 -14 -6 0.25 0.09
 7 -14 -6 0.42 0.1
 7 14 -5 2.16 0.18
 -7 14 5 2.42 0.19
 7 -14 -5 2.21 0.18
 7 -14 -5 2.18 0.18
 -7 -14 5 2.1 0.17
 -7 14 4 0.65 0.1
 7 14 -4 0.9 0.1
 7 -14 -4 0.5 0.1
 -7 -14 4 0.98 0.1
 7 -14 -4 0.65 0.1
 -7 14 3 1.04 0.12
 -7 -14 3 1.19 0.12
 7 -14 -3 0.98 0.12
 7 -14 -3 0.97 0.12
 7 14 -2 -0.01 0.02
 -7 14 2 -0.01 0.02
 7 -14 -2 -0.03 0.02
 -7 -14 2 -0.01 0.01
 7 -14 -2 -0.01 0.03
 -7 14 1 3.43 0.26
 7 14 -1 3.83 0.27
 -7 -14 1 3.67 0.26
 7 -14 -1 3.52 0.27
 7 -14 -1 3.76 0.27
 7 14 0 0.44 0.1
 -7 14 0 0.55 0.09
 7 -14 0 0.6 0.1
 -7 -14 0 0.6 0.1
 7 -14 0 0.58 0.1
 -7 14 -1 0.03 0.02
 7 14 1 0.02 0.02
 -7 -14 -1 0.04 0.02
 7 -14 1 0.05 0.03
 7 -14 1 0.06 0.04
 7 14 2 0.2 0.1
 7 -14 2 0.06 0.04
 -7 -14 -2 0.23 0.1
 7 -14 2 -0.03 0.04
 7 14 3 0.02 0.02
 7 -14 3 0.03 0.04
 -7 -14 -3 -0.03 0.02
 7 -14 3 0.02 0.04
 7 14 4 0 0.02
 7 -14 4 0 0.04
 -7 -14 -4 0.19 0.11
 7 -14 4 0 0.04
 7 14 5 0.22 0.12
 7 -14 5 0.01 0.04
 7 -14 5 0.04 0.05
 -7 -14 -5 0.02 0.03
 -7 15 10 0.25 0.1
 7 15 -10 0.07 0.05
 7 -15 -10 0.19 0.1
 7 -15 -10 0.15 0.11
 -7 15 9 2.41 0.21
 7 15 -9 2.21 0.21
 7 -15 -9 2.26 0.21
 7 -15 -9 2.53 0.21
 -7 15 8 0.04 0.03
 7 15 -8 0.23 0.1
 7 -15 -8 0.26 0.1
 7 -15 -8 0.08 0.04
 7 15 -7 0.04 0.04
 -7 15 7 0.19 0.1
 7 -15 -7 0.18 0.09
 7 -15 -7 0.06 0.04
 -7 15 6 -0.01 0.02
 7 15 -6 0 0.03
 7 -15 -6 0.04 0.04
 7 -15 -6 -0.01 0.03
 -7 -15 6 0 0.02
 -7 15 5 6.18 0.4
 7 15 -5 5.84 0.4
 7 -15 -5 5.67 0.39
 7 -15 -5 5.75 0.4
 -7 -15 5 6.09 0.39
 -7 15 4 0.27 0.09
 7 -15 -4 0.2 0.08
 -7 -15 4 0.26 0.08
 7 -15 -4 0.08 0.04
 -7 15 3 0.94 0.11
 7 -15 -3 0.74 0.11
 7 -15 -3 0.76 0.11
 -7 -15 3 0.91 0.11
 -7 15 2 0.39 0.08
 7 15 -2 0.28 0.1
 7 -15 -2 0.44 0.09
 -7 -15 2 0.42 0.09
 7 -15 -2 0.43 0.09
 7 15 -1 0.55 0.1
 -7 15 1 0.59 0.1
 7 -15 -1 0.62 0.1
 7 -15 -1 0.81 0.11
 -7 -15 1 0.7 0.1
 -7 15 0 0.13 0.07
 7 15 0 0.17 0.09
 7 -15 0 0.19 0.09
 7 -15 0 0.19 0.08
 -7 -15 0 0.19 0.09
 -7 15 -1 0.37 0.08
 7 15 1 0.68 0.12
 7 -15 1 0.36 0.11
 7 -15 1 0.37 0.1
 7 15 2 0.67 0.13
 7 -15 2 0.86 0.13
 7 -15 2 0.77 0.12
 7 15 3 0.34 0.12
 -7 -15 -3 0.43 0.11
 7 -15 3 0.21 0.12
 7 -15 3 0.15 0.11
 7 15 4 0.34 0.11
 7 -15 4 0.36 0.12
 7 -15 4 0.38 0.12
 7 15 5 0.01 0.03
 7 -15 5 0.02 0.04
 7 -15 5 0.05 0.05
 -7 -15 -5 0.01 0.03
 7 16 -10 0.05 0.05
 -7 16 10 0.22 0.1
 7 -16 -10 0.03 0.04
 7 -16 -10 0.03 0.04
 -7 16 9 0.23 0.11
 7 16 -9 0.25 0.11
 7 -16 -9 0.23 0.12
 -7 16 8 0.03 0.02
 7 16 -8 0.14 0.1
 7 -16 -8 0.08 0.05
 7 -16 -8 0.07 0.04
 -7 16 7 -0.01 0.02
 7 -16 -7 0.03 0.04
 7 -16 -7 -0.02 0.03
 -7 16 6 0.4 0.1
 7 -16 -6 0.51 0.11
 7 -16 -6 0.45 0.1
 -7 -16 6 0.74 0.09
 -7 16 5 3.6 0.26
 7 -16 -5 3.29 0.26
 -7 -16 5 3.55 0.25
 7 -16 -5 3.18 0.25
 -7 16 4 0.32 0.09
 -7 -16 4 0.4 0.08
 7 -16 -4 0.32 0.08
 7 -16 -4 0.17 0.09
 -7 16 3 1.49 0.14
 7 -16 -3 1.38 0.14
 -7 -16 3 1.42 0.14
 7 -16 -3 1.36 0.14
 -7 16 2 0.3 0.08
 7 16 -2 0.29 0.1
 -7 -16 2 0.29 0.09
 7 -16 -2 0.3 0.09
 7 -16 -2 0.31 0.08
 -7 16 1 1.18 0.12
 7 16 -1 0.99 0.13
 7 -16 -1 0.9 0.13
 7 -16 -1 0.9 0.12
 -7 -16 1 1.01 0.12
 7 16 0 0.21 0.09
 -7 16 0 0.03 0.02
 7 -16 0 0.07 0.04
 7 -16 0 0.02 0.03
 -7 16 -1 0.9 0.1
 7 16 1 1.01 0.14
 7 -16 1 0.78 0.12
 7 -16 1 0.95 0.13
 7 16 2 0.44 0.12
 7 -16 2 0.29 0.11
 7 -16 2 0.16 0.1
 7 16 3 1.67 0.19
 7 -16 3 1.69 0.18
 7 -16 3 1.74 0.19
 7 16 4 0.21 0.11
 7 -16 4 0.24 0.12
 7 -16 4 0.03 0.05
 -7 -16 -4 0.22 0.12
 7 16 5 0.65 0.13
 -7 -16 -5 0.57 0.13
 7 -16 5 0.63 0.15
 7 -16 5 0.74 0.16
 -7 17 10 0 0.02
 7 -17 -10 0.01 0.04
 -7 17 9 1.64 0.17
 7 -17 -9 1.2 0.16
 -7 17 8 0.05 0.03
 7 -17 -8 0.18 0.1
 7 -17 -8 0.15 0.09
 -7 17 7 3.87 0.28
 7 -17 -7 3.56 0.28
 7 -17 -7 3.62 0.28
 -7 17 6 1.85 0.18
 7 -17 -6 1.66 0.16
 7 -17 -6 1.8 0.18
 -7 17 5 0.28 0.1
 7 -17 -5 0.18 0.08
 -7 -17 5 0.19 0.08
 7 -17 -5 0.16 0.09
 -7 17 4 0.36 0.09
 7 -17 -4 0.12 0.08
 -7 -17 4 0.45 0.09
 7 -17 -4 0.22 0.09
 7 17 -3 0.26 0.09
 -7 17 3 0.4 0.09
 7 -17 -3 0.41 0.09
 -7 -17 3 0.42 0.09
 7 -17 -3 0.33 0.08
 -7 17 2 0.03 0.02
 7 17 -2 0.02 0.02
 7 -17 -2 0.13 0.09
 -7 -17 2 0.1 0.08
 7 -17 -2 0.01 0.03
 7 17 -1 0.98 0.14
 -7 17 1 1.09 0.12
 7 -17 -1 1.3 0.14
 7 -17 -1 1.08 0.12
 -7 17 0 0.1 0.07
 7 17 0 0.02 0.02
 7 -17 0 0.01 0.03
 7 -17 0 0.03 0.03
 7 17 1 0.04 0.02
 -7 17 -1 0 0.02
 7 -17 1 -0.01 0.03
 7 -17 1 0.02 0.03
 7 17 2 0.42 0.11
 7 -17 2 0.32 0.11
 7 -17 2 0.37 0.11
 7 17 3 -0.01 0.02
 7 -17 3 0 0.04
 7 -17 3 0.05 0.05
 7 -17 4 0.22 0.12
 7 -17 4 0.23 0.13
 -7 18 10 0.61 0.13
 7 -18 -10 0.57 0.14
 7 -18 -9 0.3 0.12
 -7 18 8 0.98 0.14
 7 -18 -8 0.83 0.14
 -7 18 7 0.77 0.13
 7 -18 -7 0.64 0.11
 7 -18 -7 0.81 0.13
 -7 18 6 0.24 0.1
 7 -18 -6 0.27 0.09
 7 -18 -6 0.21 0.1
 -7 18 5 0.01 0.02
 7 -18 -5 0 0.03
 7 -18 -5 0.07 0.04
 -7 -18 5 0.03 0.02
 -7 18 4 0.47 0.11
 7 -18 -4 0.48 0.11
 -7 -18 4 0.47 0.1
 7 -18 -4 0.54 0.09
 7 18 -3 2.66 0.21
 -7 18 3 2.73 0.21
 7 -18 -3 2.37 0.21
 7 -18 -3 2.3 0.2
 -7 -18 3 2.56 0.21
 7 18 -2 0.12 0.1
 -7 18 2 0.12 0.09
 7 -18 -2 0.13 0.07
 7 -18 -2 0.12 0.09
 -7 -18 2 0.21 0.08
 -7 18 1 0.31 0.08
 7 18 -1 0.36 0.11
 7 -18 -1 0.34 0.09
 7 -18 -1 0.37 0.1
 -7 18 0 0.01 0.02
 7 18 0 0.21 0.11
 7 -18 0 0.01 0.03
 7 -18 0 0 0.03
 -7 18 -1 0.69 0.1
 7 18 1 0.78 0.13
 7 -18 1 0.63 0.11
 7 -18 1 0.83 0.12
 7 18 2 0.19 0.11
 7 -18 2 0.05 0.04
 7 -18 2 0.08 0.05
 7 18 3 0.65 0.13
 7 -18 3 0.32 0.12
 7 -18 3 0.35 0.13
 7 18 4 0 0.03
 7 -18 4 0 0.04
 7 -18 4 0.03 0.05
 -7 19 9 0.15 0.12
 7 -19 -9 0.19 0.11
 -7 19 8 1.92 0.18
 7 -19 -8 1.52 0.18
 -7 19 7 0.43 0.11
 7 -19 -7 0.43 0.13
 -7 19 6 1.66 0.16
 7 -19 -6 1.13 0.15
 7 -19 -6 1.15 0.13
 -7 19 5 1.12 0.14
 7 -19 -5 0.97 0.13
 -7 -19 5 0.69 0.11
 7 -19 -5 0.88 0.11
 -7 19 4 1.13 0.13
 7 -19 -4 1 0.13
 -7 -19 4 1.06 0.12
 7 -19 -4 0.98 0.12
 7 19 -3 0.95 0.13
 -7 19 3 1.16 0.13
 7 -19 -3 1.02 0.14
 7 -19 -3 1.05 0.12
 -7 -19 3 0.87 0.12
 -7 19 2 1.85 0.16
 7 19 -2 1.74 0.17
 7 -19 -2 1.63 0.16
 7 -19 -2 1.47 0.15
 7 19 -1 0.17 0.11
 -7 19 1 0 0.02
 7 -19 -1 0.02 0.04
 7 -19 -1 0.01 0.03
 7 19 0 0.13 0.1
 -7 19 0 0.11 0.08
 7 -19 0 0.05 0.04
 7 -19 0 0.04 0.04
 7 19 1 -0.01 0.02
 7 -19 1 0.06 0.04
 7 -19 1 0 0.04
 7 19 2 0.37 0.12
 7 -19 2 0.39 0.12
 7 -19 2 0.54 0.12
 7 19 3 0.01 0.03
 7 -19 3 0.02 0.04
 7 -19 3 0 0.04
 7 19 4 0.5 0.13
 7 -19 4 0.37 0.13
 7 -19 4 0.42 0.14
 -7 20 9 0.49 0.13
 7 -20 -9 0.34 0.13
 -7 20 8 0.16 0.11
 7 -20 -8 0.15 0.12
 -7 20 7 0.15 0.11
 7 -20 -7 0.05 0.05
 -7 20 6 0.24 0.11
 7 -20 -6 0.2 0.1
 -7 20 5 0.01 0.02
 7 -20 -5 -0.02 0.04
 -7 -20 5 -0.01 0.02
 -7 20 4 0.01 0.02
 7 -20 -4 0.16 0.09
 7 -20 -4 0.04 0.03
 -7 -20 4 0.02 0.02
 7 20 -3 0.01 0.02
 -7 20 3 -0.01 0.02
 7 -20 -3 -0.03 0.03
 -7 -20 3 0.03 0.02
 7 -20 -3 0 0.03
 7 20 -2 0.35 0.12
 -7 20 2 0.26 0.1
 7 -20 -2 0.29 0.1
 7 -20 -2 0.25 0.08
 7 20 -1 0.53 0.12
 -7 20 1 0.42 0.1
 7 -20 -1 0.46 0.1
 7 -20 -1 0.41 0.11
 -7 20 0 0.5 0.1
 7 20 0 0.52 0.12
 7 -20 0 0.61 0.12
 7 -20 0 0.52 0.11
 7 20 1 0.02 0.03
 7 -20 1 0.01 0.04
 7 -20 1 0.22 0.09
 7 -20 2 0.21 0.11
 7 -20 2 0.26 0.12
 7 20 3 0.17 0.11
 7 -20 3 -0.03 0.04
 7 -20 3 0.05 0.05
 -7 21 9 0.01 0.03
 7 -21 -9 0.05 0.05
 -7 21 8 0.15 0.11
 7 -21 -8 0.17 0.11
 -7 21 7 0.29 0.12
 7 -21 -7 0.1 0.05
 -7 21 6 0.48 0.12
 7 -21 -6 0.26 0.12
 -7 21 5 1.56 0.16
 7 -21 -5 1.33 0.16
 -7 -21 5 1.06 0.13
 -7 21 4 1.41 0.17
 7 21 -4 1.82 0.17
 -7 -21 4 1.66 0.16
 7 -21 -4 1.73 0.18
 7 21 -3 0.27 0.11
 -7 21 3 0.46 0.12
 -7 -21 3 0.12 0.09
 7 -21 -3 0.18 0.1
 7 21 -2 0.32 0.12
 -7 21 2 0.2 0.1
 7 -21 -2 0.36 0.09
 7 -21 -2 0.21 0.1
 -7 21 1 0 0.02
 7 21 -1 0.01 0.03
 7 -21 -1 0.04 0.04
 7 -21 -1 -0.01 0.03
 7 21 0 0.93 0.14
 -7 21 0 0.86 0.12
 7 -21 0 0.87 0.12
 7 -21 0 1.05 0.15
 7 21 1 -0.01 0.03
 7 -21 1 0.05 0.04
 7 -21 1 0.02 0.04
 7 21 2 -0.04 0.02
 7 -21 2 0.02 0.04
 7 -21 2 -0.01 0.04
 7 21 3 0.04 0.03
 7 -21 3 0.03 0.04
 7 -21 3 0.05 0.05
 -7 22 8 0.16 0.11
 7 -22 -8 -0.02 0.04
 -7 22 7 0.65 0.13
 7 -22 -7 0.62 0.14
 -7 22 6 0.42 0.13
 7 -22 -6 0.42 0.13
 -7 22 5 0.02 0.03
 -7 -22 5 -0.01 0.02
 7 -22 -5 0 0.04
 7 22 -4 0.27 0.09
 -7 22 4 0.23 0.1
 7 -22 -4 0.24 0.11
 -7 -22 4 0.31 0.1
 7 22 -3 0.2 0.11
 -7 -22 3 0.16 0.09
 7 -22 -3 0.28 0.11
 7 22 -2 1.23 0.17
 -7 22 2 1.16 0.15
 7 -22 -2 1.16 0.15
 7 22 -1 0.03 0.03
 -7 22 1 -0.01 0.02
 7 -22 -1 0.03 0.04
 -7 22 0 0.05 0.03
 7 22 0 0.18 0.12
 7 -22 0 0.05 0.04
 7 -22 0 0.07 0.04
 7 22 1 0.22 0.12
 7 -22 1 0.17 0.11
 7 -22 1 0.06 0.04
 7 22 2 -0.01 0.03
 7 -22 2 0.03 0.04
 7 -22 2 0.02 0.05
 7 22 3 0.01 0.03
 7 -22 3 0.05 0.05
 7 -22 3 0.01 0.04
 -7 23 8 0.03 0.03
 7 -23 -8 -0.06 0.04
 -7 23 7 0.06 0.03
 7 -23 -7 0.16 0.12
 -7 23 6 0.59 0.13
 7 -23 -6 0.72 0.14
 -7 23 5 0.63 0.14
 7 -23 -5 0.69 0.13
 -7 23 4 0.04 0.03
 7 23 -4 0.04 0.03
 7 -23 -4 0.02 0.04
 -7 -23 4 0.19 0.1
 7 23 -3 1.2 0.16
 -7 23 3 1.28 0.15
 -7 -23 3 1.41 0.15
 7 -23 -3 1.15 0.15
 -7 23 2 0.49 0.12
 7 23 -2 0.87 0.15
 7 -23 -2 0.74 0.14
 -7 23 1 1.48 0.16
 7 23 -1 1.48 0.18
 7 -23 -1 1.43 0.17
 -7 23 0 0.01 0.02
 7 23 0 0.03 0.03
 7 -23 0 0.02 0.04
 7 23 1 0 0.03
 7 -23 1 0.05 0.04
 7 23 2 0.02 0.03
 7 -23 2 0.03 0.05
 -7 24 7 -0.01 0.02
 7 -24 -7 0 0.04
 -7 24 6 0.06 0.03
 7 -24 -6 0.14 0.11
 -7 24 5 1.52 0.17
 7 -24 -5 1.49 0.17
 -7 24 4 0.24 0.12
 7 24 -4 0.17 0.11
 7 -24 -4 0.35 0.13
 -7 -24 4 0.26 0.1
 -7 24 3 0.03 0.03
 7 24 -3 0.08 0.03
 7 -24 -3 0.02 0.04
 -7 24 2 0.14 0.11
 7 -24 -2 0.15 0.12
 -7 24 1 0.01 0.02
 7 24 -1 0.01 0.03
 7 -24 -1 0 0.04
 -7 24 0 0.02 0.02
 7 24 0 0.01 0.03
 7 -24 0 -0.01 0.04
 7 24 1 0.03 0.03
 7 -24 1 0.06 0.05
 7 24 2 0.23 0.13
 7 -24 2 0.18 0.13
 -7 25 7 0.21 0.13
 7 -25 -7 0.05 0.05
 -7 25 6 0.17 0.13
 7 -25 -6 0.02 0.04
 7 -25 -5 0.19 0.12
 -7 25 4 0.23 0.11
 7 25 -4 0.34 0.11
 7 -25 -4 0.32 0.13
 -7 -25 4 0.28 0.1
 7 25 -3 0.15 0.1
 -7 25 3 0.01 0.02
 7 -25 -3 -0.02 0.04
 -7 25 2 0.04 0.03
 7 25 -2 0.34 0.13
 7 -25 -2 0.01 0.04
 7 25 -1 0 0.03
 -7 25 1 -0.02 0.02
 7 -25 -1 0 0.04
 7 25 0 0.03 0.03
 7 -25 0 0.16 0.12
 7 25 1 0.05 0.03
 7 -25 1 0.07 0.05
 -7 26 6 0.04 0.03
 7 -26 -6 0.07 0.05
 -7 26 5 0.01 0.03
 7 -26 -5 0.15 0.11
 7 26 -4 0.16 0.11
 -7 -26 4 0.2 0.11
 7 -26 -4 -0.01 0.04
 7 26 -3 0.51 0.13
 -7 26 3 0.61 0.14
 7 -26 -3 0.43 0.13
 7 26 -2 0.01 0.03
 -7 26 2 0.01 0.02
 7 -26 -2 -0.03 0.04
 -7 26 1 0 0.02
 7 26 -1 0.01 0.03
 7 -26 -1 0.02 0.04
 7 26 0 0.22 0.12
 7 -26 0 0.04 0.04
 7 26 1 0.53 0.14
 7 -26 1 0.44 0.13
 7 -27 -5 0.25 0.12
 7 27 -4 0.01 0.03
 -7 27 4 0 0.03
 7 -27 -4 0.09 0.05
 -7 -27 4 0.02 0.03
 -7 27 3 0.04 0.03
 7 27 -3 0.16 0.12
 7 -27 -3 0.14 0.11
 7 27 -2 0.28 0.13
 7 -27 -2 0.22 0.13
 7 27 -1 -0.02 0.03
 -7 27 1 -0.02 0.02
 7 -27 -1 -0.02 0.04
 7 27 0 0.22 0.14
 7 -27 0 0.16 0.12
 7 28 -4 0.01 0.02
 -7 28 4 0.27 0.13
 7 -28 -4 0.06 0.05
 -7 28 3 -0.01 0.03
 7 28 -3 -0.03 0.03
 7 -28 -3 -0.01 0.04
 -7 28 2 0.01 0.03
 7 28 -2 0.29 0.14
 7 -28 -2 0.03 0.05
 8 0 -11 0.08 0.06
 8 0 -10 0 0.05
 8 0 -9 0 0.04
 -8 0 8 0.53 0.09
 8 0 -8 0.64 0.12
 8 0 -7 0.03 0.03
 -8 0 7 0.12 0.07
 -8 0 6 0.41 0.09
 8 0 -6 0.47 0.1
 -8 0 5 -0.02 0.02
 8 0 -5 0.01 0.03
 8 0 -4 2.97 0.23
 -8 0 4 2.95 0.22
 -8 0 3 0.01 0.02
 8 0 -3 0.01 0.03
 8 0 -2 10.62 0.71
 -8 0 2 11.41 0.69
 8 0 -1 0.11 0.08
 -8 0 0 0.03 0.02
 8 0 0 0.02 0.03
 8 0 1 0.02 0.03
 -8 0 -1 0 0.02
 -8 0 -2 1.29 0.14
 8 0 2 1.38 0.15
 8 0 3 -0.04 0.04
 -8 0 -3 0.01 0.02
 8 0 4 0.02 0.04
 8 0 5 0.01 0.05
 8 1 -11 0.06 0.06
 8 -1 -11 0.06 0.06
 8 1 -10 0.01 0.05
 8 -1 -10 0.03 0.05
 8 -1 -9 0.35 0.12
 -8 1 8 0.77 0.1
 8 1 -8 0.68 0.12
 8 -1 -8 0.73 0.12
 -8 -1 8 0.76 0.1
 -8 1 7 4.53 0.3
 8 1 -7 3.86 0.31
 8 -1 -7 4.5 0.31
 -8 -1 7 4.19 0.29
 8 1 -6 0.54 0.1
 -8 1 6 0.67 0.09
 -8 -1 6 0.57 0.09
 8 -1 -6 0.49 0.1
 8 1 -5 0.4 0.09
 -8 1 5 0.2 0.07
 -8 -1 5 0.38 0.08
 8 -1 -5 0.42 0.09
 8 1 -4 1.12 0.13
 -8 1 4 1.29 0.12
 8 -1 -4 1.24 0.13
 -8 -1 4 1.41 0.13
 -8 1 3 0.53 0.09
 8 1 -3 0.62 0.1
 -8 -1 3 0.56 0.09
 8 -1 -3 0.47 0.09
 8 1 -2 0.18 0.08
 -8 1 2 0.09 0.07
 -8 -1 2 0.12 0.08
 8 -1 -2 0.31 0.08
 -8 1 1 11.12 0.71
 8 1 -1 10.87 0.72
 8 -1 -1 11.74 0.73
 -8 -1 1 11.37 0.71
 8 -1 -1 11.34 0.68
 -8 1 0 1.57 0.14
 8 1 0 1.38 0.15
 8 -1 0 1.6 0.15
 8 -1 0 1.52 0.13
 -8 -1 0 1.51 0.15
 -8 1 -1 2.86 0.21
 8 1 1 2.58 0.22
 8 -1 1 2.74 0.23
 8 -1 1 2.75 0.2
 -8 -1 -1 2.71 0.21
 8 1 2 0.22 0.09
 -8 1 -2 0.46 0.09
 -8 -1 -2 0.26 0.09
 8 -1 2 0.36 0.1
 8 -1 2 0.42 0.09
 8 1 3 -0.03 0.04
 -8 1 -3 0.01 0.02
 8 -1 3 0 0.04
 -8 -1 -3 0 0.02
 8 1 4 0.3 0.11
 8 -1 4 0.21 0.11
 8 1 5 0.06 0.05
 8 -1 5 0.07 0.05
 8 2 -11 0.37 0.15
 8 -2 -11 0.41 0.14
 8 2 -10 0.24 0.12
 8 -2 -10 0.34 0.14
 -8 2 9 0.41 0.09
 8 2 -9 0.37 0.12
 8 -2 -9 0.48 0.09
 8 -2 -9 0.54 0.13
 8 2 -8 1.8 0.18
 -8 2 8 1.93 0.16
 8 -2 -8 2.03 0.18
 -8 -2 8 1.49 0.15
 8 -2 -8 2 0.16
 8 2 -7 0.22 0.09
 -8 2 7 0.21 0.07
 8 -2 -7 0.29 0.09
 8 -2 -7 0.21 0.07
 8 2 -6 0.59 0.1
 -8 2 6 0.28 0.08
 8 -2 -6 0.23 0.07
 8 -2 -6 0.11 0.08
 -8 -2 6 0.65 0.09
 8 2 -5 5.99 0.42
 -8 2 5 6.05 0.41
 8 -2 -5 6.24 0.42
 -8 -2 5 6.54 0.41
 8 -2 -5 6.53 0.39
 8 2 -4 0.69 0.1
 -8 -2 4 0.53 0.09
 8 -2 -4 0.55 0.1
 8 -2 -4 0.59 0.07
 8 2 -3 0 0.03
 -8 2 3 -0.01 0.01
 8 -2 -3 0 0.02
 8 -2 -3 -0.01 0.03
 -8 -2 3 0 0.02
 8 2 -2 1.77 0.15
 -8 2 2 1.18 0.14
 -8 -2 2 1.74 0.15
 8 -2 -2 1.41 0.14
 8 -2 -2 1.48 0.12
 -8 2 1 1.57 0.15
 8 2 -1 1.52 0.16
 8 -2 -1 1.82 0.17
 8 -2 -1 1.68 0.13
 -8 -2 1 1.69 0.16
 8 2 0 0.04 0.03
 -8 2 0 0.17 0.08
 -8 -2 0 -0.01 0.02
 8 -2 0 0.06 0.04
 8 -2 0 0.16 0.06
 -8 2 -1 0.69 0.1
 8 2 1 0.79 0.11
 8 -2 1 0.47 0.09
 8 -2 1 0.67 0.11
 -8 -2 -1 0.59 0.1
 8 2 2 0.19 0.09
 -8 -2 -2 0.23 0.08
 8 -2 2 0.03 0.04
 8 2 3 -0.01 0.04
 -8 2 -3 0.02 0.02
 8 -2 3 0 0.03
 8 -2 3 0.21 0.1
 -8 -2 -3 0.01 0.02
 8 2 4 -0.04 0.03
 8 -2 4 -0.02 0.03
 8 -2 4 0.06 0.05
 8 2 5 0 0.04
 8 -2 5 0.01 0.05
 8 3 -11 0.02 0.06
 8 -3 -11 -0.02 0.04
 8 -3 -11 0 0.05
 8 3 -10 0.59 0.14
 8 -3 -10 0.75 0.14
 8 -3 -10 0.67 0.12
 -8 3 9 0.43 0.09
 8 3 -9 0.78 0.13
 8 -3 -9 0.51 0.1
 8 -3 -9 0.62 0.13
 -8 3 8 0.15 0.08
 8 3 -8 0.16 0.11
 8 -3 -8 0.19 0.07
 -8 -3 8 0.1 0.07
 8 -3 -8 0.03 0.04
 -8 3 7 0.23 0.08
 8 3 -7 0.25 0.09
 8 -3 -7 0.26 0.1
 8 -3 -7 0.22 0.07
 -8 -3 7 0.41 0.08
 -8 3 6 0.01 0.02
 8 3 -6 0.02 0.03
 8 -3 -6 -0.02 0.02
 8 -3 -6 0.01 0.03
 -8 -3 6 0.1 0.07
 8 3 -5 0.36 0.08
 -8 3 5 0.38 0.08
 8 -3 -5 0.38 0.09
 -8 -3 5 0.27 0.08
 8 -3 -5 0.3 0.07
 -8 3 4 1.59 0.15
 8 3 -4 1.51 0.15
 -8 -3 4 1.56 0.15
 8 -3 -4 1.58 0.15
 8 -3 -4 1.68 0.13
 8 3 -3 1.78 0.17
 -8 3 3 2.17 0.17
 -8 -3 3 1.83 0.17
 8 -3 -3 2.33 0.19
 8 -3 -3 2.4 0.16
 -8 3 2 4.7 0.33
 8 3 -2 4.63 0.34
 8 -3 -2 4.99 0.31
 8 -3 -2 4.85 0.34
 -8 -3 2 4.86 0.33
 8 3 -1 0.32 0.09
 -8 3 1 0.33 0.09
 -8 -3 1 0.49 0.09
 8 -3 -1 0.51 0.07
 8 -3 -1 0.59 0.1
 -8 3 0 0.92 0.11
 8 3 0 0.95 0.12
 8 -3 0 0.86 0.12
 -8 -3 0 0.98 0.12
 8 -3 0 0.9 0.1
 8 3 1 0.36 0.1
 -8 3 -1 0.61 0.1
 -8 -3 -1 0.6 0.11
 8 -3 1 0.56 0.09
 8 -3 1 0.67 0.12
 -8 3 -2 2.86 0.22
 8 3 2 3.1 0.24
 -8 -3 -2 3.1 0.23
 8 -3 2 3.13 0.25
 8 -3 2 2.73 0.22
 -8 3 -3 -0.01 0.02
 8 3 3 0.04 0.04
 8 -3 3 0.06 0.05
 8 -3 3 0.02 0.03
 -8 -3 -3 0.01 0.02
 8 3 4 0.51 0.12
 8 -3 4 0.32 0.12
 8 -3 4 0.39 0.1
 8 3 5 0 0.04
 8 -3 5 0.05 0.05
 8 -3 5 -0.01 0.04
 8 4 -11 0.06 0.06
 8 -4 -11 0.09 0.06
 8 -4 -11 0.08 0.04
 8 4 -10 0.1 0.06
 8 -4 -10 0.17 0.09
 8 -4 -10 0.18 0.12
 -8 4 9 0.01 0.02
 8 4 -9 0.04 0.05
 8 -4 -9 0.03 0.04
 8 -4 -9 0.02 0.03
 8 4 -8 1.36 0.15
 -8 4 8 1.03 0.12
 8 -4 -8 0.97 0.12
 8 -4 -8 1.01 0.14
 -8 -4 8 1.25 0.12
 -8 4 7 2.57 0.2
 8 4 -7 2.42 0.21
 8 -4 -7 2.68 0.22
 -8 -4 7 2.53 0.19
 8 -4 -7 2.47 0.19
 -8 4 6 2.85 0.2
 8 4 -6 1.92 0.2
 8 -4 -6 2.81 0.21
 -8 -4 6 2.21 0.19
 8 -4 -6 2.86 0.19
 -8 4 5 0.15 0.07
 8 4 -5 0.19 0.08
 8 -4 -5 0.17 0.06
 8 -4 -5 0.18 0.08
 -8 -4 5 0.11 0.07
 8 4 -4 0.27 0.08
 -8 4 4 0.27 0.07
 -8 -4 4 0.21 0.07
 8 -4 -4 0.25 0.06
 8 -4 -4 0.29 0.08
 -8 4 3 3.84 0.27
 8 4 -3 3.64 0.27
 8 -4 -3 3.54 0.27
 8 -4 -3 3.92 0.25
 -8 -4 3 3.57 0.26
 8 4 -2 2.63 0.23
 -8 4 2 3.19 0.24
 -8 -4 2 2.62 0.23
 8 -4 -2 3.73 0.22
 8 -4 -2 3.99 0.26
 -8 4 1 0.14 0.08
 8 4 -1 0.24 0.08
 -8 -4 1 0.24 0.08
 8 -4 -1 0.16 0.09
 8 -4 -1 0.18 0.06
 8 4 0 1.43 0.15
 -8 4 0 1.78 0.16
 8 -4 0 1.62 0.16
 8 -4 0 1.82 0.14
 -8 -4 0 1.73 0.16
 -8 4 -1 3.3 0.24
 8 4 1 3.29 0.26
 8 -4 1 3.39 0.26
 8 -4 1 3.22 0.24
 -8 -4 -1 3.52 0.25
 8 4 2 0.2 0.09
 -8 4 -2 0.12 0.08
 8 -4 2 0.07 0.05
 8 -4 2 0.09 0.07
 -8 -4 -2 0.21 0.09
 8 4 3 0.28 0.1
 8 -4 3 0.23 0.11
 8 -4 3 0.14 0.08
 -8 -4 -3 0.13 0.09
 8 4 4 0.65 0.13
 8 -4 4 0.66 0.13
 8 -4 4 0.74 0.11
 8 4 5 -0.05 0.04
 8 -4 5 0 0.04
 8 -4 5 -0.01 0.05
 8 5 -11 0.08 0.06
 8 -5 -11 0.3 0.11
 8 -5 -11 -0.02 0.05
 8 5 -10 0.03 0.05
 8 -5 -10 0 0.03
 8 -5 -10 0.09 0.05
 8 5 -9 0.37 0.12
 -8 5 9 0.42 0.09
 8 -5 -9 0.36 0.09
 8 -5 -9 0.48 0.12
 8 5 -8 0.06 0.04
 -8 5 8 0.01 0.02
 8 -5 -8 0.18 0.08
 8 -5 -8 0.02 0.04
 -8 -5 8 0.17 0.07
 -8 5 7 0.8 0.11
 8 5 -7 0.77 0.12
 -8 -5 7 0.92 0.11
 8 -5 -7 0.81 0.1
 8 -5 -7 0.93 0.13
 -8 5 6 1.07 0.12
 8 5 -6 0.88 0.12
 8 -5 -6 0.89 0.1
 8 -5 -6 0.99 0.12
 -8 -5 6 0.98 0.11
 -8 5 5 1.53 0.14
 8 5 -5 1.43 0.14
 8 -5 -5 1.49 0.13
 8 -5 -5 1.37 0.15
 -8 -5 5 1.55 0.14
 8 5 -4 0.35 0.08
 -8 5 4 0.21 0.07
 8 -5 -4 0.25 0.08
 -8 -5 4 0.32 0.08
 8 -5 -4 0.3 0.06
 -8 5 3 1.82 0.17
 8 5 -3 2.15 0.18
 -8 -5 3 2.17 0.18
 8 -5 -3 2.28 0.16
 8 -5 -3 2.14 0.19
 8 5 -2 0.38 0.08
 -8 5 2 0.29 0.08
 8 -5 -2 0.39 0.09
 -8 -5 2 0.42 0.09
 8 -5 -2 0.41 0.07
 -8 5 1 3.35 0.26
 8 5 -1 3.69 0.27
 -8 -5 1 3.77 0.26
 8 -5 -1 3.56 0.24
 8 -5 -1 3.39 0.27
 8 5 0 0.49 0.09
 -8 5 0 0.36 0.09
 -8 -5 0 0.42 0.09
 8 -5 0 0.44 0.1
 8 -5 0 0.45 0.08
 8 5 1 0.02 0.03
 8 -5 1 0.13 0.07
 8 -5 1 0.16 0.1
 -8 -5 -1 0.28 0.09
 -8 5 -2 0.51 0.1
 8 5 2 0.64 0.11
 8 -5 2 0.59 0.12
 8 -5 2 0.61 0.1
 -8 -5 -2 0.67 0.11
 8 5 3 0.07 0.04
 8 -5 3 0.02 0.03
 8 -5 3 0.18 0.11
 -8 -5 -3 0.03 0.02
 8 5 4 0.38 0.11
 8 -5 4 0.53 0.13
 8 -5 4 0.54 0.11
 -8 -5 -4 0.51 0.1
 8 5 5 0.07 0.05
 8 -5 5 0.01 0.04
 8 -5 5 0.04 0.05
 8 6 -11 0.2 0.14
 8 -6 -11 0.2 0.11
 8 -6 -11 0.02 0.05
 8 6 -10 0.49 0.14
 8 -6 -10 0.33 0.12
 -8 6 9 0.48 0.1
 8 6 -9 0.52 0.13
 8 -6 -9 0.65 0.14
 8 -6 -9 0.52 0.1
 -8 6 8 2.46 0.2
 8 6 -8 2.16 0.22
 8 -6 -8 2.45 0.19
 8 -6 -8 2.77 0.22
 -8 6 7 0 0.02
 8 6 -7 0.04 0.04
 8 -6 -7 -0.01 0.02
 8 -6 -7 0.01 0.04
 -8 -6 7 0 0.02
 8 6 -6 0.11 0.08
 -8 -6 6 0.17 0.08
 8 -6 -6 0.13 0.08
 8 -6 -6 0.03 0.03
 8 6 -5 0.15 0.07
 -8 6 5 0.13 0.07
 8 -6 -5 0.09 0.07
 -8 6 4 2.9 0.21
 8 6 -4 2.38 0.21
 -8 -6 4 2.63 0.21
 8 -6 -4 2.95 0.22
 8 -6 -4 2.71 0.19
 8 6 -3 1.1 0.13
 -8 6 3 1.1 0.12
 -8 -6 3 1.37 0.13
 8 -6 -3 1.2 0.11
 8 -6 -3 1.18 0.13
 8 6 -2 0.5 0.09
 -8 6 2 0.32 0.09
 8 -6 -2 0.3 0.09
 8 -6 -2 0.37 0.07
 -8 -6 2 0.4 0.08
 -8 6 1 0.52 0.1
 8 6 -1 0.56 0.1
 -8 -6 1 0.5 0.1
 8 -6 -1 0.43 0.08
 8 -6 -1 0.41 0.1
 -8 6 0 0.01 0.02
 8 6 0 0.02 0.03
 8 -6 0 0 0.03
 -8 -6 0 0.01 0.02
 8 -6 0 0.09 0.07
 -8 6 -1 0.64 0.1
 8 6 1 0.81 0.11
 -8 -6 -1 0.81 0.12
 8 -6 1 0.58 0.12
 8 -6 1 0.93 0.11
 -8 6 -2 0.94 0.11
 8 6 2 0.75 0.12
 8 -6 2 1.09 0.12
 -8 -6 -2 0.78 0.12
 8 -6 2 1.02 0.14
 8 6 3 0.78 0.12
 8 -6 3 1.14 0.15
 8 -6 3 0.91 0.12
 -8 -6 -3 0.98 0.13
 8 6 4 0.28 0.11
 8 -6 4 0.34 0.12
 8 -6 4 0.23 0.1
 -8 -6 -4 0.25 0.1
 8 6 5 0.07 0.05
 8 -6 5 0.28 0.14
 8 -6 5 0.07 0.04
 8 7 -11 1.57 0.2
 8 -7 -11 1.24 0.16
 8 -7 -11 1.46 0.18
 8 7 -10 1.03 0.16
 8 -7 -10 0.78 0.14
 8 -7 -10 0.83 0.13
 8 7 -9 0.18 0.11
 -8 7 9 0.02 0.02
 8 -7 -9 0.01 0.04
 8 -7 -9 0.05 0.04
 -8 7 8 0.17 0.09
 8 7 -8 0.22 0.1
 8 -7 -8 0.13 0.1
 8 -7 -8 0.11 0.08
 -8 7 7 0.28 0.09
 8 7 -7 0.29 0.09
 8 -7 -7 0.5 0.1
 -8 -7 7 0.23 0.08
 8 -7 -7 0.17 0.08
 8 7 -6 1.95 0.18
 -8 7 6 2.03 0.17
 -8 -7 6 2.09 0.17
 8 -7 -6 2.02 0.18
 8 -7 -6 1.9 0.16
 -8 7 5 2.25 0.19
 8 -7 -5 2.58 0.2
 8 -7 -5 2.35 0.18
 8 7 -4 1.62 0.15
 -8 7 4 1.73 0.16
 8 -7 -4 1.83 0.17
 8 -7 -4 1.65 0.14
 -8 -7 4 1.88 0.16
 -8 7 3 0.82 0.11
 8 7 -3 0.62 0.1
 8 -7 -3 0.82 0.11
 8 -7 -3 0.72 0.09
 -8 -7 3 0.75 0.1
 -8 7 2 0.3 0.08
 8 7 -2 0.31 0.08
 -8 -7 2 0.31 0.08
 8 -7 -2 0.34 0.07
 8 -7 -2 0.25 0.09
 8 7 -1 0.46 0.09
 -8 7 1 0.23 0.08
 -8 -7 1 0.55 0.1
 8 -7 -1 0.24 0.09
 8 -7 -1 0.31 0.07
 8 7 0 3.4 0.26
 -8 7 0 3.38 0.25
 8 -7 0 3.43 0.27
 8 -7 0 3.75 0.25
 -8 -7 0 3.53 0.26
 -8 7 -1 0.72 0.1
 8 7 1 0.55 0.1
 8 -7 1 0.88 0.12
 8 -7 1 0.8 0.1
 -8 -7 -1 0.65 0.11
 -8 7 -2 0.01 0.02
 8 7 2 0.03 0.03
 -8 -7 -2 0 0.02
 8 -7 2 0.04 0.03
 8 -7 2 0.04 0.04
 8 7 3 0.04 0.04
 -8 -7 -3 0.04 0.02
 8 -7 3 0.01 0.03
 8 -7 3 0.19 0.11
 8 7 4 0.01 0.04
 -8 -7 -4 0.02 0.02
 8 -7 4 0.01 0.05
 8 -7 4 -0.03 0.03
 8 7 5 0.04 0.04
 8 -7 5 0.07 0.04
 8 -7 5 0.15 0.12
 8 8 -11 0.27 0.14
 8 -8 -11 0.21 0.11
 8 -8 -11 0.08 0.06
 8 8 -10 0.24 0.12
 8 -8 -10 0.19 0.1
 8 -8 -10 0.06 0.05
 8 8 -9 -0.01 0.04
 -8 8 9 0 0.02
 8 -8 -9 0.17 0.09
 8 -8 -9 0.02 0.05
 8 8 -8 0.3 0.11
 -8 8 8 0.46 0.1
 8 -8 -8 0.53 0.1
 8 -8 -8 0.55 0.11
 -8 8 7 1.33 0.14
 8 8 -7 1.62 0.16
 8 -8 -7 1.53 0.14
 8 -8 -7 1.5 0.16
 -8 -8 7 1.56 0.14
 -8 8 6 2.09 0.17
 8 8 -6 1.35 0.16
 -8 -8 6 1.65 0.15
 8 -8 -6 1.88 0.16
 8 -8 -6 2.13 0.17
 -8 8 5 2.63 0.2
 8 8 -5 2.44 0.21
 8 -8 -5 2.6 0.19
 -8 -8 5 2.68 0.2
 8 -8 -5 2.76 0.22
 -8 8 4 0.39 0.09
 8 8 -4 0.58 0.09
 8 -8 -4 0.28 0.09
 8 -8 -4 0.3 0.07
 -8 -8 4 0.5 0.09
 8 8 -3 0.37 0.08
 -8 8 3 0.34 0.09
 8 -8 -3 0.26 0.07
 -8 -8 3 0.29 0.08
 8 -8 -3 0.33 0.09
 8 8 -2 0.35 0.08
 -8 8 2 0.15 0.08
 8 -8 -2 0.3 0.09
 -8 -8 2 0.26 0.09
 8 -8 -2 0.28 0.07
 8 8 -1 2.82 0.22
 -8 8 1 2.7 0.21
 8 -8 -1 2.73 0.23
 8 -8 -1 2.72 0.2
 -8 -8 1 2.91 0.22
 -8 8 0 0.23 0.08
 8 8 0 0.15 0.07
 8 -8 0 0.18 0.09
 -8 -8 0 0.18 0.09
 8 -8 0 0.25 0.08
 -8 8 -1 -0.01 0.02
 8 8 1 0.01 0.03
 -8 -8 -1 0.02 0.02
 8 -8 1 -0.02 0.04
 8 -8 1 0.04 0.03
 8 -8 2 0.01 0.03
 8 -8 2 0.16 0.11
 -8 -8 -2 0.13 0.09
 8 8 3 0.21 0.09
 8 -8 3 0.15 0.09
 8 -8 3 0.09 0.05
 -8 -8 -3 0.04 0.03
 8 8 4 0.04 0.04
 -8 -8 -4 0.01 0.02
 8 -8 4 -0.02 0.04
 8 -8 4 0.14 0.1
 8 -8 5 0.07 0.04
 8 -8 5 0.05 0.05
 8 9 -11 0.83 0.16
 8 -9 -11 0.58 0.14
 8 -9 -11 0.56 0.13
 8 9 -10 0.2 0.12
 -8 9 10 0.12 0.09
 8 -9 -10 0.08 0.05
 8 -9 -10 0.25 0.11
 8 9 -9 1.26 0.16
 -8 9 9 1.36 0.14
 8 -9 -9 1.32 0.15
 8 -9 -9 1.42 0.16
 8 9 -8 1.1 0.15
 -8 9 8 1.01 0.13
 8 -9 -8 0.98 0.13
 8 -9 -8 1.09 0.14
 8 9 -7 0.12 0.09
 -8 9 7 0.07 0.02
 -8 -9 7 0.03 0.02
 8 -9 -7 0.05 0.03
 8 -9 -7 0.04 0.04
 8 9 -6 -0.03 0.03
 -8 9 6 -0.01 0.02
 -8 -9 6 -0.02 0.01
 8 -9 -6 0.01 0.03
 8 -9 -6 0.01 0.03
 8 9 -5 0.11 0.07
 8 -9 -5 0.03 0.03
 8 -9 -5 0.14 0.08
 -8 -9 5 0.16 0.08
 -8 9 4 -0.01 0.02
 8 9 -4 -0.02 0.03
 -8 -9 4 0.02 0.02
 8 -9 -4 -0.03 0.02
 8 -9 -4 0.05 0.04
 8 9 -3 0.58 0.09
 -8 9 3 0.2 0.08
 8 -9 -3 0.16 0.08
 8 -9 -3 0.2 0.07
 -8 9 2 5.29 0.35
 8 9 -2 5.02 0.35
 -8 -9 2 5.19 0.35
 8 -9 -2 5.04 0.34
 8 -9 -2 4.91 0.36
 8 9 -1 0.02 0.03
 -8 9 1 0.04 0.02
 -8 -9 1 0.02 0.02
 8 -9 -1 0.04 0.04
 8 -9 -1 0.04 0.03
 8 9 0 0.54 0.09
 -8 9 0 0.49 0.1
 8 -9 0 0.49 0.09
 8 -9 0 0.54 0.11
 -8 -9 0 0.62 0.11
 8 9 1 0.32 0.09
 8 -9 1 0.26 0.09
 -8 -9 -1 0.39 0.1
 8 -9 1 0.17 0.1
 -8 9 -2 0.25 0.08
 8 9 2 0.36 0.09
 -8 -9 -2 0.32 0.1
 8 -9 2 0.31 0.11
 8 -9 2 0.12 0.09
 8 9 3 0.01 0.03
 8 -9 3 -0.01 0.05
 8 -9 3 0.07 0.04
 -8 -9 -3 0.01 0.02
 8 -9 4 0 0.04
 -8 -9 -4 0.03 0.03
 8 -9 4 0.14 0.12
 8 -9 5 0.02 0.05
 8 -9 5 0.03 0.04
 8 10 -11 0.05 0.06
 8 -10 -11 0 0.04
 8 -10 -11 0.28 0.12
 -8 10 10 0 0.02
 8 10 -10 0.04 0.05
 8 -10 -10 -0.03 0.05
 8 -10 -10 -0.01 0.03
 8 10 -9 -0.04 0.04
 -8 10 9 0 0.02
 8 -10 -9 0.03 0.05
 8 -10 -9 -0.02 0.03
 8 10 -8 -0.01 0.04
 -8 10 8 0 0.02
 8 -10 -8 0.03 0.03
 8 -10 -8 0.04 0.04
 -8 10 7 -0.01 0.02
 8 10 -7 0.04 0.04
 8 -10 -7 -0.01 0.03
 -8 -10 7 0.01 0.02
 8 -10 -7 0.07 0.04
 -8 10 6 1 0.12
 8 10 -6 0.88 0.12
 8 -10 -6 1.13 0.13
 -8 -10 6 0.89 0.11
 8 -10 -6 1.17 0.12
 8 10 -5 1.42 0.14
 -8 10 5 1.55 0.15
 8 -10 -5 1.32 0.14
 -8 -10 5 1.64 0.14
 8 -10 -5 1.73 0.16
 -8 10 4 1.68 0.15
 8 10 -4 1.47 0.14
 8 -10 -4 1.67 0.16
 8 -10 -4 1.58 0.14
 -8 -10 4 1.6 0.15
 8 10 -3 2.11 0.18
 -8 10 3 2.31 0.18
 -8 -10 3 2.08 0.18
 8 -10 -3 2.1 0.17
 8 -10 -3 2.06 0.19
 8 10 -2 0.71 0.1
 -8 10 2 0.87 0.11
 8 -10 -2 0.83 0.12
 8 -10 -2 0.83 0.11
 -8 -10 2 0.71 0.11
 -8 10 1 0.06 0.02
 8 10 -1 0.12 0.07
 8 -10 -1 0.23 0.08
 -8 -10 1 0.25 0.08
 8 -10 -1 0.07 0.04
 -8 10 0 0.4 0.09
 8 10 0 0.25 0.08
 8 -10 0 0.36 0.1
 8 -10 0 0.42 0.09
 8 10 1 1.09 0.12
 -8 10 -1 0.99 0.12
 8 -10 1 1.21 0.15
 -8 -10 -1 1.17 0.14
 8 -10 1 1.12 0.13
 8 10 2 0.02 0.03
 -8 -10 -2 0.01 0.02
 8 -10 2 0.04 0.05
 8 -10 2 0.03 0.03
 8 -10 3 0.32 0.11
 -8 -10 -3 0.18 0.11
 8 -10 3 0.19 0.12
 8 -10 4 0.07 0.05
 -8 -10 -4 0.04 0.03
 8 -10 4 0.07 0.04
 8 -10 5 0.06 0.05
 8 -10 5 0.17 0.13
 8 11 -11 0.52 0.14
 8 -11 -11 0.25 0.14
 8 -11 -11 0.07 0.05
 8 11 -10 0.3 0.14
 -8 11 10 0.18 0.1
 8 -11 -10 0.17 0.11
 8 -11 -10 0.19 0.12
 -8 11 9 0.01 0.02
 8 11 -9 0.05 0.05
 8 -11 -9 0 0.04
 8 -11 -9 0.04 0.05
 -8 11 8 0.21 0.1
 8 11 -8 0.23 0.11
 8 -11 -8 0.18 0.09
 8 -11 -8 0.19 0.1
 8 11 -7 2.57 0.21
 -8 11 7 2.32 0.2
 8 -11 -7 2.33 0.2
 -8 -11 7 2.55 0.19
 8 -11 -7 2.3 0.21
 -8 11 6 1.46 0.14
 8 11 -6 1.25 0.14
 -8 -11 6 1.37 0.13
 8 -11 -6 1.32 0.15
 8 -11 -6 1.35 0.14
 -8 11 5 0.43 0.09
 8 11 -5 0.31 0.08
 8 -11 -5 0.47 0.1
 8 -11 -5 0.37 0.09
 -8 -11 5 0.29 0.08
 8 11 -4 0.01 0.03
 -8 11 4 0 0.02
 -8 -11 4 -0.01 0.02
 8 -11 -4 0.03 0.03
 8 -11 -4 0.02 0.03
 8 11 -3 0.37 0.08
 -8 11 3 0.22 0.09
 8 -11 -3 0.31 0.09
 8 -11 -3 0.31 0.08
 -8 -11 3 0.17 0.08
 8 11 -2 0.54 0.09
 -8 11 2 0.43 0.09
 8 -11 -2 0.43 0.09
 8 -11 -2 0.56 0.1
 -8 -11 2 0.53 0.1
 -8 11 1 0.4 0.1
 8 -11 -1 0.55 0.11
 -8 -11 1 1.06 0.12
 8 -11 -1 0.64 0.1
 8 11 0 0.61 0.09
 -8 11 0 0.66 0.1
 8 -11 0 0.61 0.11
 8 -11 0 0.6 0.11
 -8 -11 0 0.74 0.12
 -8 11 -1 0.11 0.07
 8 -11 1 0.05 0.04
 8 -11 1 0.02 0.04
 -8 -11 -1 0.04 0.03
 8 -11 2 0.12 0.06
 8 -11 2 0.16 0.1
 -8 -11 -2 0.16 0.11
 8 -11 3 0.03 0.04
 8 -11 3 0.14 0.11
 -8 -11 -3 0.14 0.11
 8 -11 4 0.04 0.04
 -8 -11 -4 0.03 0.03
 8 -11 4 0.05 0.05
 -8 12 10 0.65 0.12
 8 12 -10 0.97 0.15
 8 -12 -10 0.6 0.14
 8 -12 -10 0.69 0.13
 -8 12 9 0.21 0.1
 8 12 -9 0.35 0.12
 8 -12 -9 0.2 0.11
 8 -12 -9 0.27 0.11
 8 12 -8 0.37 0.1
 -8 12 8 0.25 0.09
 8 -12 -8 0.35 0.1
 8 -12 -8 0.23 0.1
 -8 12 7 0.9 0.13
 8 12 -7 1.16 0.13
 8 -12 -7 1 0.12
 8 -12 -7 1.16 0.14
 -8 -12 7 1.07 0.12
 -8 12 6 0.35 0.09
 8 12 -6 0.37 0.09
 8 -12 -6 0.29 0.1
 8 -12 -6 0.23 0.09
 -8 -12 6 0.29 0.08
 8 12 -5 0.08 0.03
 -8 12 5 0.05 0.02
 8 -12 -5 0.06 0.04
 -8 -12 5 0.05 0.02
 8 -12 -5 0.16 0.08
 8 12 -4 0.36 0.08
 -8 12 4 0.44 0.09
 8 -12 -4 0.45 0.09
 -8 -12 4 0.39 0.09
 8 -12 -4 0.5 0.1
 -8 12 3 2.99 0.22
 8 12 -3 2.62 0.21
 8 -12 -3 2.74 0.21
 -8 -12 3 2.74 0.21
 8 -12 -3 2.69 0.22
 -8 12 2 0.26 0.09
 8 12 -2 0.5 0.08
 8 -12 -2 0.26 0.08
 -8 -12 2 0.47 0.1
 8 -12 -2 0.24 0.09
 -8 12 1 2.43 0.2
 8 -12 -1 2.54 0.21
 8 -12 -1 2.51 0.2
 -8 -12 1 2.51 0.21
 -8 12 0 -0.01 0.02
 8 -12 0 -0.01 0.04
 -8 -12 0 0 0.02
 8 -12 0 0.02 0.03
 -8 12 -1 0.29 0.08
 -8 -12 -1 0.59 0.12
 8 -12 1 0.36 0.1
 8 -12 1 0.35 0.11
 8 -12 2 0 0.03
 -8 -12 -2 -0.01 0.03
 8 -12 2 -0.03 0.04
 8 -12 3 0.53 0.13
 -8 -12 -3 0.24 0.12
 8 -12 3 0.43 0.12
 8 -12 4 -0.03 0.04
 -8 -12 -4 -0.02 0.03
 8 -12 4 -0.05 0.04
 -8 13 10 0.87 0.13
 8 13 -10 0.63 0.15
 8 -13 -10 0.78 0.14
 8 -13 -10 1 0.14
 -8 13 9 0.7 0.13
 8 13 -9 1.07 0.15
 8 -13 -9 0.87 0.14
 8 -13 -9 0.91 0.13
 -8 13 8 0.62 0.12
 8 13 -8 0.45 0.12
 8 -13 -8 0.73 0.12
 8 -13 -8 0.68 0.12
 -8 13 7 0.87 0.13
 8 13 -7 1.18 0.13
 8 -13 -7 1.05 0.14
 8 -13 -7 0.93 0.13
 8 13 -6 0.04 0.03
 -8 13 6 0.03 0.02
 8 -13 -6 0.05 0.04
 8 -13 -6 0.01 0.03
 -8 -13 6 0.04 0.02
 -8 13 5 0 0.02
 8 13 -5 0 0.03
 -8 -13 5 0.01 0.02
 8 -13 -5 0.01 0.03
 8 -13 -5 0 0.03
 -8 13 4 0.32 0.09
 8 13 -4 0.25 0.07
 -8 -13 4 0.3 0.08
 8 -13 -4 0.37 0.08
 8 -13 -4 0.33 0.09
 -8 13 3 0.38 0.09
 8 13 -3 0.19 0.07
 8 -13 -3 0.36 0.08
 8 -13 -3 0.46 0.09
 -8 -13 3 0.27 0.09
 -8 13 2 1.88 0.17
 8 -13 -2 1.85 0.18
 -8 -13 2 1.88 0.17
 8 -13 -2 1.77 0.17
 -8 13 1 0.17 0.08
 8 -13 -1 0.2 0.09
 8 -13 -1 0.16 0.09
 -8 13 0 0.01 0.02
 8 -13 0 0.02 0.03
 -8 -13 0 0.02 0.02
 8 -13 0 -0.02 0.03
 -8 13 -1 0.02 0.02
 8 -13 1 0.02 0.03
 8 -13 1 0.13 0.1
 -8 -13 -1 0 0.03
 8 -13 2 0.04 0.05
 -8 -13 -2 0.03 0.03
 8 -13 2 0.18 0.1
 -8 -13 -3 -0.02 0.03
 8 -13 3 0.05 0.05
 8 -13 3 0 0.04
 8 -13 4 0.09 0.06
 8 -13 4 0.01 0.04
 -8 -13 -4 0.23 0.12
 8 14 -10 0.67 0.15
 -8 14 10 0.68 0.13
 8 -14 -10 0.56 0.14
 8 -14 -10 0.64 0.14
 8 14 -9 0.04 0.05
 -8 14 9 -0.03 0.02
 8 -14 -9 0.18 0.11
 8 -14 -9 0.02 0.04
 8 14 -8 0.85 0.13
 -8 14 8 1 0.13
 8 -14 -8 0.93 0.14
 8 -14 -8 1.11 0.14
 -8 14 7 -0.01 0.02
 8 14 -7 0.02 0.03
 8 -14 -7 0 0.04
 8 -14 -7 0.05 0.04
 -8 14 6 3.15 0.22
 8 14 -6 2.01 0.2
 8 -14 -6 2.55 0.21
 -8 -14 6 2.75 0.21
 8 -14 -6 2.94 0.23
 8 14 -5 0.43 0.09
 -8 14 5 0.56 0.11
 8 -14 -5 0.31 0.1
 -8 -14 5 0.61 0.1
 8 -14 -5 0.44 0.09
 -8 14 4 0.23 0.09
 8 -14 -4 0.03 0.04
 8 -14 -4 0.04 0.03
 -8 -14 4 0.13 0.08
 -8 14 3 -0.02 0.02
 8 -14 -3 0.14 0.09
 -8 -14 3 0.01 0.02
 8 -14 -3 0.04 0.03
 -8 14 2 0.32 0.1
 -8 -14 2 0.26 0.09
 8 -14 -2 0.32 0.09
 8 -14 -2 0.25 0.09
 -8 14 1 1.68 0.16
 8 -14 -1 1.69 0.17
 8 -14 -1 1.93 0.17
 -8 -14 1 2.01 0.17
 -8 14 0 0.04 0.02
 8 -14 0 0.19 0.09
 8 -14 0 0.09 0.05
 -8 -14 0 0.01 0.02
 -8 14 -1 0.11 0.08
 8 -14 1 0.27 0.11
 -8 -14 -1 0.13 0.1
 8 -14 1 0.34 0.11
 8 -14 2 0.13 0.1
 8 -14 2 0.03 0.05
 -8 -14 -2 0.18 0.12
 8 -14 3 0.03 0.05
 8 -14 3 -0.01 0.04
 -8 -14 -3 0.01 0.03
 -8 -14 -4 0.04 0.03
 8 -14 4 -0.01 0.04
 8 -14 4 -0.05 0.04
 8 15 -10 0.16 0.13
 -8 15 10 0.14 0.11
 8 -15 -10 0.05 0.05
 8 -15 -10 0.02 0.04
 8 15 -9 0.51 0.13
 -8 15 9 0.81 0.13
 8 -15 -9 0.68 0.13
 8 -15 -9 0.62 0.13
 8 15 -8 0.67 0.12
 -8 15 8 0.73 0.12
 8 -15 -8 0.59 0.12
 8 -15 -8 0.71 0.12
 8 15 -7 0.41 0.1
 -8 15 7 0.54 0.12
 8 -15 -7 0.5 0.12
 8 -15 -7 0.51 0.12
 -8 15 6 0.26 0.1
 8 -15 -6 0.2 0.09
 -8 -15 6 0.26 0.08
 8 -15 -6 0.07 0.04
 -8 15 5 1.72 0.17
 -8 -15 5 1.53 0.15
 8 -15 -5 1.67 0.16
 8 -15 -5 1.7 0.16
 -8 15 4 0.49 0.11
 8 -15 -4 0.18 0.09
 8 -15 -4 0.38 0.1
 -8 -15 4 0.31 0.09
 -8 15 3 0.38 0.1
 -8 -15 3 0.32 0.1
 8 -15 -3 0.42 0.09
 8 -15 -3 0.38 0.1
 -8 15 2 0 0.02
 8 -15 -2 0.01 0.03
 -8 -15 2 0 0.02
 8 -15 -2 -0.02 0.03
 -8 15 1 0.15 0.08
 8 -15 -1 0.19 0.1
 8 -15 -1 0.23 0.09
 -8 15 0 0.35 0.09
 8 -15 0 0.59 0.12
 8 -15 0 0.34 0.11
 -8 -15 0 0.37 0.11
 -8 15 -1 0.44 0.1
 -8 -15 -1 0.94 0.13
 8 -15 1 0.82 0.13
 8 -15 1 0.88 0.14
 -8 -15 -2 0 0.03
 8 -15 2 0.02 0.04
 8 -15 2 0.02 0.05
 -8 -15 -3 0.03 0.03
 8 -15 3 -0.01 0.04
 8 -15 3 0.01 0.05
 8 -15 4 0.04 0.05
 -8 -15 -4 0.03 0.03
 8 -15 4 0.08 0.06
 -8 16 10 0.16 0.1
 8 -16 -10 -0.01 0.04
 8 -16 -10 -0.02 0.04
 -8 16 9 -0.01 0.02
 8 -16 -9 0 0.04
 8 -16 -9 0.01 0.04
 -8 16 8 0.02 0.02
 8 -16 -8 0.12 0.1
 8 -16 -8 0.18 0.11
 -8 16 7 0 0.02
 8 -16 -7 0.17 0.1
 8 -16 -7 0.02 0.04
 -8 16 6 0.21 0.11
 8 -16 -6 0.25 0.1
 -8 -16 6 0.33 0.09
 -8 16 5 0.94 0.13
 8 -16 -5 0.7 0.12
 -8 -16 5 0.81 0.11
 8 -16 -5 0.77 0.12
 -8 16 4 0.45 0.1
 8 -16 -4 0.13 0.1
 8 -16 -4 0.18 0.09
 -8 -16 4 0.16 0.08
 -8 16 3 1.89 0.17
 -8 -16 3 2.01 0.18
 8 -16 -3 1.82 0.18
 8 -16 -3 1.74 0.17
 -8 16 2 0.02 0.02
 8 -16 -2 0.2 0.09
 -8 -16 2 0.04 0.03
 8 -16 -2 0.03 0.04
 -8 16 1 0.12 0.09
 8 -16 -1 0.11 0.09
 8 -16 -1 0.2 0.1
 -8 -16 1 0.26 0.1
 -8 16 0 0.18 0.08
 8 16 0 0.04 0.03
 -8 -16 0 0.06 0.03
 8 -16 0 0.12 0.1
 8 -16 0 0.05 0.04
 8 16 1 0.99 0.16
 -8 16 -1 0.94 0.12
 8 -16 1 1.07 0.15
 8 -16 1 1.11 0.15
 -8 -16 -1 1.24 0.15
 8 16 2 -0.02 0.02
 8 -16 2 0.02 0.05
 8 -16 2 -0.05 0.03
 -8 -16 -2 0.02 0.03
 8 -16 3 0.21 0.11
 8 -16 3 0.14 0.06
 -8 -16 -3 0.02 0.03
 -8 17 9 0.71 0.14
 8 -17 -9 0.68 0.14
 8 -17 -9 0.54 0.12
 -8 17 8 0.04 0.03
 8 -17 -8 -0.01 0.04
 8 -17 -8 0.02 0.04
 -8 17 7 1.93 0.19
 8 -17 -7 1.92 0.19
 8 -17 -7 1.58 0.17
 -8 17 6 2.4 0.21
 8 -17 -6 2.21 0.21
 8 -17 -6 2.71 0.22
 -8 -17 6 2.31 0.19
 -8 17 5 1.62 0.16
 -8 -17 5 1.07 0.14
 8 -17 -5 1.49 0.15
 8 -17 -5 1.32 0.15
 -8 17 4 0.66 0.12
 8 -17 -4 0.88 0.12
 8 -17 -4 0.82 0.13
 -8 -17 4 0.69 0.12
 -8 17 3 1.61 0.16
 8 -17 -3 1.48 0.16
 -8 -17 3 1.43 0.16
 8 -17 -3 1.62 0.16
 -8 17 2 0.66 0.12
 -8 -17 2 0.79 0.13
 8 -17 -2 0.85 0.13
 8 -17 -2 0.66 0.12
 8 17 -1 1.85 0.19
 -8 17 1 1.85 0.17
 8 -17 -1 2.08 0.19
 -8 -17 1 1.91 0.19
 8 -17 -1 1.99 0.19
 8 17 0 0.44 0.12
 -8 17 0 0.35 0.09
 8 -17 0 0.45 0.12
 8 -17 0 0.35 0.11
 -8 -17 0 0.44 0.11
 8 17 1 0.03 0.03
 8 -17 1 0.09 0.05
 -8 -17 -1 0.02 0.03
 8 -17 1 0.04 0.04
 8 17 2 0.04 0.03
 -8 -17 -2 0.3 0.13
 8 -17 2 0.07 0.05
 8 -17 2 0.09 0.05
 8 17 3 0.52 0.14
 8 -17 3 0.51 0.14
 -8 -17 -3 0.59 0.13
 8 -17 3 0.48 0.14
 -8 18 9 0.23 0.12
 8 -18 -9 0.22 0.11
 -8 18 8 0.82 0.13
 8 -18 -8 0.82 0.14
 8 -18 -8 0.57 0.13
 -8 18 7 0.03 0.03
 8 -18 -7 0 0.04
 8 -18 -7 0.06 0.04
 -8 18 6 0.39 0.11
 8 -18 -6 0.21 0.11
 -8 -18 6 0.28 0.09
 8 -18 -6 0.38 0.1
 -8 18 5 0.45 0.12
 8 -18 -5 0.19 0.1
 8 -18 -5 0.23 0.11
 -8 -18 5 0.29 0.09
 -8 18 4 0.63 0.12
 8 -18 -4 0.59 0.11
 -8 -18 4 0.71 0.12
 8 -18 -4 0.55 0.12
 -8 18 3 0.78 0.13
 8 -18 -3 0.55 0.12
 -8 -18 3 0.77 0.13
 8 -18 -3 0.64 0.12
 -8 18 2 1.22 0.14
 8 -18 -2 0.73 0.14
 8 -18 -2 1.08 0.14
 -8 -18 2 1.24 0.14
 8 18 -1 0.53 0.13
 -8 18 1 0.46 0.1
 8 -18 -1 0.58 0.11
 8 -18 -1 0.41 0.12
 -8 -18 1 0.35 0.12
 -8 18 0 0.16 0.09
 8 18 0 -0.02 0.02
 8 -18 0 0.01 0.04
 -8 -18 0 0.03 0.03
 8 -18 0 0.03 0.04
 8 18 1 0.18 0.13
 -8 -18 -1 0.08 0.04
 8 -18 1 0.23 0.12
 8 -18 1 0.25 0.11
 8 18 2 -0.01 0.03
 -8 -18 -2 0.26 0.12
 8 -18 2 0.04 0.05
 8 -18 2 0.05 0.05
 8 18 3 0.3 0.13
 8 -18 3 0.02 0.05
 8 -18 3 0.04 0.05
 -8 -18 -3 0.03 0.03
 -8 19 9 0.33 0.12
 8 -19 -9 0.21 0.12
 -8 19 8 0.04 0.03
 8 -19 -8 -0.03 0.04
 -8 19 7 0.45 0.13
 8 -19 -7 0.23 0.12
 -8 19 6 0 0.02
 8 -19 -6 -0.01 0.04
 8 -19 -6 -0.02 0.04
 -8 19 5 1.13 0.15
 -8 -19 5 1.26 0.14
 8 -19 -5 1.18 0.14
 8 -19 -5 1.16 0.15
 -8 19 4 1.93 0.18
 -8 -19 4 1.56 0.16
 8 -19 -4 1.77 0.18
 8 -19 -4 1.55 0.17
 -8 19 3 1.05 0.13
 8 -19 -3 0.94 0.14
 8 -19 -3 0.91 0.13
 -8 -19 3 0.69 0.12
 -8 19 2 0.95 0.13
 8 19 -2 1.06 0.15
 8 -19 -2 0.94 0.14
 -8 -19 2 1.1 0.15
 8 -19 -2 1.09 0.14
 -8 19 1 0.14 0.1
 8 19 -1 -0.01 0.03
 8 -19 -1 0.02 0.04
 -8 -19 1 -0.02 0.02
 8 -19 -1 0.02 0.04
 8 19 0 0 0.03
 -8 19 0 0.13 0.09
 8 -19 0 0.04 0.04
 -8 -19 0 -0.03 0.03
 8 -19 0 0.03 0.04
 8 19 1 0.53 0.13
 8 -19 1 0.38 0.13
 8 -19 1 0.35 0.12
 -8 -19 -1 0.54 0.14
 8 19 2 0.01 0.03
 8 -19 2 0.03 0.04
 -8 -19 -2 0.01 0.03
 8 -19 2 0.06 0.05
 -8 20 8 0.31 0.11
 -8 20 7 -0.01 0.02
 8 -20 -7 -0.04 0.03
 -8 20 6 2.46 0.22
 8 -20 -6 2.32 0.22
 -8 20 5 0.16 0.12
 8 -20 -5 0.05 0.04
 8 -20 -5 0.25 0.1
 -8 -20 5 0.2 0.09
 -8 20 4 1.95 0.19
 -8 -20 4 1.64 0.17
 8 -20 -4 1.69 0.18
 8 -20 -4 1.63 0.17
 -8 20 3 0.02 0.02
 8 -20 -3 0.04 0.04
 8 -20 -3 0.02 0.04
 -8 -20 3 0.03 0.03
 8 20 -2 0.18 0.12
 -8 20 2 0.3 0.11
 8 -20 -2 0.28 0.1
 8 -20 -2 0.19 0.12
 -8 -20 2 0.34 0.11
 8 20 -1 -0.01 0.03
 -8 20 1 0 0.02
 -8 -20 1 0.01 0.03
 8 -20 -1 0 0.04
 8 -20 -1 0.02 0.04
 8 20 0 0.01 0.03
 -8 20 0 0.01 0.02
 -8 -20 0 0.16 0.11
 8 -20 0 -0.01 0.04
 8 -20 0 0.03 0.04
 8 20 1 0.35 0.13
 8 -20 1 0.19 0.11
 -8 -20 -1 0.17 0.13
 8 -20 1 0.02 0.04
 8 20 2 0.36 0.13
 8 -20 2 0.02 0.05
 8 -20 2 0.08 0.05
 -8 -20 -2 0.07 0.04
 -8 21 8 0.02 0.03
 8 -21 -8 -0.03 0.04
 -8 21 7 0.17 0.11
 8 -21 -7 0.04 0.04
 -8 21 6 0.79 0.14
 8 -21 -6 0.91 0.15
 8 -21 -5 0.26 0.11
 -8 -21 5 0.29 0.1
 -8 21 4 0.3 0.12
 -8 -21 4 0.35 0.11
 8 -21 -4 0.41 0.12
 -8 21 3 0 0.02
 -8 -21 3 0.04 0.03
 8 -21 -3 0.06 0.04
 8 -21 -3 0.07 0.04
 -8 21 2 0.93 0.15
 8 21 -2 1.17 0.16
 8 -21 -2 1.22 0.16
 -8 -21 2 1.25 0.15
 8 -21 -2 1.12 0.14
 8 21 -1 0.27 0.13
 -8 21 1 0.22 0.11
 8 -21 -1 0.3 0.12
 -8 -21 1 0.07 0.04
 8 -21 -1 0.13 0.1
 8 21 0 0.2 0.13
 8 -21 0 0.21 0.1
 8 -21 0 0.28 0.13
 8 21 1 0.03 0.03
 -8 -21 -1 0.03 0.03
 8 -21 1 0.03 0.05
 8 -21 1 0.04 0.05
 8 21 2 0.2 0.13
 -8 -21 -2 -0.05 0.03
 8 -21 2 0.02 0.05
 8 -21 2 0.04 0.05
 -8 22 7 0 0.03
 8 -22 -7 0.02 0.04
 -8 22 6 0.17 0.12
 -8 22 5 0.26 0.11
 8 -22 -5 0.28 0.11
 -8 -22 5 0.34 0.1
 -8 22 4 0.51 0.13
 -8 -22 4 0.61 0.11
 8 -22 -4 0.45 0.12
 -8 22 3 0 0.02
 8 -22 -3 -0.06 0.03
 -8 -22 3 0.03 0.03
 -8 22 2 0.03 0.03
 8 22 -2 0.02 0.03
 8 -22 -2 0.04 0.04
 -8 -22 2 0 0.03
 -8 22 1 0.02 0.02
 8 22 -1 0.05 0.03
 8 -22 -1 0.17 0.1
 -8 -22 1 0.01 0.03
 8 -22 -1 0.18 0.11
 8 22 0 0.18 0.13
 8 -22 0 -0.01 0.04
 -8 -22 0 -0.01 0.03
 8 -22 0 0.03 0.04
 8 22 1 0.26 0.14
 8 -22 1 0.33 0.13
 -8 23 7 0.21 0.12
 8 -23 -7 0.06 0.05
 -8 23 6 0.03 0.03
 8 -23 -6 0.03 0.05
 -8 23 5 0.29 0.13
 8 -23 -5 0.19 0.12
 -8 -23 4 0.16 0.11
 8 -23 -4 0.2 0.12
 -8 23 3 0 0.03
 8 23 -3 0 0.03
 -8 -23 3 0.2 0.12
 8 -23 -3 0.1 0.05
 -8 23 2 -0.03 0.02
 8 23 -2 0.2 0.13
 -8 -23 2 -0.01 0.03
 8 -23 -2 0.01 0.04
 8 23 -1 0.22 0.13
 8 -23 -1 0.38 0.13
 -8 -23 1 0.26 0.12
 8 23 0 0.77 0.15
 -8 -23 0 0.24 0.13
 8 -23 0 0.32 0.12
 8 23 1 0.5 0.14
 8 -23 1 0.39 0.14
 -8 24 6 0.7 0.14
 8 -24 -6 0.3 0.13
 -8 24 5 0.38 0.13
 8 -24 -5 0.3 0.13
 -8 24 4 0.38 0.12
 -8 -24 4 0.4 0.12
 8 -24 -4 0.4 0.12
 -8 24 3 0.03 0.03
 8 24 -3 0.14 0.11
 8 -24 -3 -0.01 0.04
 -8 -24 3 0.02 0.03
 8 24 -2 0.75 0.15
 -8 24 2 0.48 0.13
 -8 -24 2 0.57 0.13
 8 -24 -2 0.4 0.13
 8 24 -1 0.27 0.14
 8 -24 -1 0.16 0.12
 8 24 0 0.23 0.13
 8 -24 0 0.04 0.05
 -8 25 5 0.15 0.12
 8 -25 -5 0.15 0.11
 -8 25 4 0.77 0.15
 -8 -25 4 1.28 0.15
 8 -25 -4 0.77 0.15
 8 25 -3 0 0.03
 -8 25 3 0.01 0.03
 8 -25 -3 0.01 0.05
 -8 -25 3 -0.01 0.03
 -8 25 2 0.68 0.14
 8 25 -2 0.59 0.14
 8 -25 -2 0.48 0.13
 -8 -25 2 0.34 0.14
 -8 25 1 0 0.03
 8 25 -1 0.25 0.12
 8 -25 -1 0.04 0.04
 -8 -25 1 -0.01 0.03
 -8 26 4 0.03 0.03
 -8 -26 4 0.18 0.12
 8 -26 -4 0.05 0.05
 -8 26 3 0.08 0.03
 8 26 -3 0.27 0.13
 8 -26 -3 0.13 0.06
 -8 -26 3 0.19 0.13
 8 26 -2 0.21 0.13
 -8 26 2 0.15 0.12
 8 -26 -2 0.02 0.05
 -8 -26 2 0.03 0.03
 9 0 -11 -0.03 0.06
 9 0 -10 0.25 0.14
 -9 0 9 0 0.02
 9 0 -9 0.01 0.05
 -9 0 8 7.88 0.51
 9 0 -8 8.02 0.54
 9 0 -7 -0.01 0.04
 -9 0 7 -0.01 0.02
 -9 0 6 2 0.18
 9 0 -6 2.01 0.19
 9 0 -5 0.01 0.03
 -9 0 4 5.12 0.36
 9 0 -4 5.22 0.37
 -9 0 3 0 0.02
 9 0 -3 0 0.03
 -9 0 2 0.21 0.09
 9 0 -2 0.15 0.09
 9 0 -1 -0.03 0.03
 -9 0 1 0 0.02
 -9 0 0 0.69 0.12
 9 0 0 0.93 0.13
 -9 0 -1 0.01 0.02
 9 0 1 0 0.04
 9 0 2 0.7 0.13
 -9 0 -2 0.65 0.12
 9 0 3 0.03 0.05
 9 0 4 0.55 0.14
 9 1 -11 -0.02 0.06
 9 -1 -11 0.02 0.06
 9 1 -10 0.27 0.13
 9 -1 -10 0.25 0.14
 9 1 -9 0.26 0.13
 9 -1 -9 0.26 0.12
 -9 1 8 1.11 0.14
 9 1 -8 1.33 0.16
 -9 -1 8 1.25 0.14
 9 -1 -8 1.35 0.16
 9 1 -7 0.18 0.1
 9 -1 -7 0.18 0.1
 -9 1 6 2.28 0.19
 9 1 -6 2.24 0.2
 9 -1 -6 1.95 0.19
 -9 -1 6 2.28 0.19
 -9 1 5 2.33 0.2
 9 1 -5 2.95 0.22
 -9 -1 5 3 0.21
 9 -1 -5 1.97 0.21
 9 1 -4 2.42 0.22
 -9 1 4 2.73 0.21
 9 -1 -4 2.56 0.22
 -9 -1 4 2.77 0.21
 9 1 -3 0.6 0.11
 -9 1 3 0.8 0.11
 9 -1 -3 0.66 0.12
 -9 -1 3 0.87 0.11
 9 1 -2 0.12 0.09
 -9 1 2 -0.01 0.02
 -9 -1 2 -0.02 0.02
 9 -1 -2 -0.04 0.03
 9 1 -1 0.03 0.04
 -9 1 1 0.01 0.02
 -9 -1 1 0.01 0.02
 9 -1 -1 0.02 0.04
 9 1 0 0.29 0.1
 9 -1 0 0.34 0.1
 9 1 1 0.22 0.1
 -9 1 -1 0.2 0.1
 -9 -1 -1 0.21 0.1
 9 -1 1 0.33 0.11
 9 1 2 0.01 0.04
 -9 1 -2 0.12 0.1
 9 -1 2 0.1 0.05
 -9 -1 -2 0.04 0.02
 9 1 3 0.01 0.04
 -9 -1 -3 -0.01 0.02
 9 -1 3 0.08 0.05
 9 1 4 0.19 0.12
 9 -1 4 0.19 0.12
 9 2 -11 0.26 0.14
 9 -2 -11 0.14 0.07
 9 2 -10 2.41 0.23
 9 -2 -10 2.17 0.24
 -9 2 9 0.22 0.1
 9 2 -9 0.43 0.14
 9 -2 -9 0.43 0.13
 -9 2 8 0.43 0.1
 9 2 -8 0.46 0.12
 9 -2 -8 0.79 0.13
 -9 -2 8 0.33 0.1
 -9 2 7 0.15 0.1
 9 2 -7 0.2 0.1
 9 -2 -7 0.28 0.1
 -9 -2 7 0.32 0.1
 9 2 -6 4.42 0.34
 -9 2 6 4.91 0.33
 9 -2 -6 4.56 0.34
 -9 -2 6 4.62 0.33
 9 2 -5 1.78 0.18
 -9 2 5 1.74 0.17
 -9 -2 5 1.91 0.17
 9 -2 -5 1.73 0.17
 -9 2 4 2.2 0.18
 9 2 -4 1.77 0.18
 -9 -2 4 1.83 0.18
 9 -2 -4 1.99 0.19
 9 2 -3 0.49 0.11
 -9 2 3 0.56 0.11
 9 -2 -3 0.52 0.11
 -9 -2 3 0.65 0.11
 9 2 -2 3.3 0.24
 -9 2 2 2.76 0.23
 -9 -2 2 3.39 0.24
 9 -2 -2 2.47 0.24
 -9 2 1 0.01 0.02
 9 2 -1 0 0.04
 9 -2 -1 0.01 0.04
 -9 -2 1 -0.02 0.02
 -9 2 0 0.04 0.02
 9 2 0 0.08 0.04
 -9 -2 0 0.04 0.02
 9 -2 0 0.05 0.04
 -9 2 -1 0.14 0.09
 9 2 1 0.09 0.05
 9 -2 1 0.13 0.11
 -9 -2 -1 0.04 0.03
 9 2 2 0.01 0.04
 -9 2 -2 0.04 0.02
 -9 -2 -2 0.02 0.02
 9 -2 2 -0.02 0.04
 9 2 3 0 0.04
 -9 -2 -3 -0.01 0.02
 9 -2 3 -0.01 0.05
 9 2 4 0.32 0.13
 9 -2 4 0.39 0.14
 9 3 -11 0.04 0.06
 9 -3 -11 0 0.05
 9 3 -10 0.45 0.15
 9 -3 -10 0.3 0.14
 -9 3 9 0.75 0.12
 9 3 -9 0.88 0.15
 9 -3 -9 0.83 0.14
 9 3 -8 0.15 0.11
 -9 -3 8 0.14 0.09
 9 -3 -8 -0.02 0.04
 -9 3 7 0.19 0.1
 9 3 -7 0.36 0.11
 -9 -3 7 0.36 0.1
 9 -3 -7 0.49 0.11
 9 3 -6 0.79 0.12
 -9 3 6 0.77 0.12
 9 -3 -6 0.73 0.13
 -9 -3 6 0.77 0.12
 -9 3 5 -0.01 0.02
 9 3 -5 0.04 0.04
 -9 -3 5 0.01 0.02
 9 -3 -5 0.01 0.03
 -9 3 4 0.17 0.09
 9 3 -4 0.07 0.04
 -9 -3 4 0.27 0.1
 9 -3 -4 0.14 0.09
 -9 3 3 0.39 0.1
 9 3 -3 0.72 0.11
 9 -3 -3 0.39 0.1
 -9 -3 3 0.83 0.11
 -9 3 2 3.2 0.24
 9 3 -2 2.99 0.24
 -9 -3 2 3.14 0.24
 9 -3 -2 2.89 0.25
 9 3 -1 0.61 0.11
 -9 3 1 0.54 0.11
 9 -3 -1 0.52 0.11
 -9 -3 1 0.61 0.12
 -9 3 0 0.02 0.02
 9 3 0 0.05 0.04
 -9 -3 0 0.03 0.03
 9 -3 0 0.17 0.1
 -9 3 -1 0.01 0.02
 9 3 1 0.01 0.04
 9 -3 1 0.03 0.04
 -9 -3 -1 0.02 0.02
 9 3 2 0.09 0.05
 -9 3 -2 0.23 0.09
 9 -3 2 0.21 0.12
 -9 -3 -2 0.21 0.11
 9 3 3 0.03 0.04
 -9 -3 -3 0.26 0.1
 9 -3 3 -0.01 0.05
 9 3 4 0.46 0.14
 9 -3 4 0.52 0.15
 9 4 -11 0.22 0.14
 9 -4 -11 0.23 0.14
 9 4 -10 0.39 0.14
 9 -4 -10 0.42 0.14
 9 4 -9 0.17 0.13
 9 -4 -9 0 0.05
 9 4 -8 2.33 0.21
 -9 4 8 2.35 0.2
 9 -4 -8 2.13 0.22
 -9 -4 8 2.14 0.19
 -9 4 7 1.22 0.14
 9 4 -7 0.99 0.15
 9 -4 -7 1 0.14
 -9 -4 7 1.05 0.13
 9 4 -6 3.96 0.31
 -9 4 6 4.36 0.31
 9 -4 -6 4.52 0.32
 -9 -4 6 4.29 0.3
 -9 4 5 0.19 0.1
 9 4 -5 0.06 0.04
 9 -4 -5 0.24 0.1
 -9 -4 5 0.28 0.09
 9 4 -4 4.86 0.34
 -9 4 4 4.54 0.33
 -9 -4 4 5.12 0.33
 9 -4 -4 4.48 0.34
 -9 4 3 0.66 0.11
 9 4 -3 0.7 0.11
 -9 -4 3 0.87 0.11
 9 -4 -3 0.7 0.12
 -9 4 2 4.16 0.29
 9 4 -2 3.89 0.3
 -9 -4 2 3.98 0.29
 9 -4 -2 4.03 0.31
 -9 4 1 0.12 0.08
 9 4 -1 0 0.04
 -9 -4 1 0.01 0.02
 9 -4 -1 0.02 0.04
 -9 4 0 1.19 0.14
 9 4 0 1.84 0.17
 -9 -4 0 1.75 0.17
 9 -4 0 1.28 0.17
 9 4 1 0.19 0.1
 -9 -4 -1 0.39 0.11
 9 -4 1 0.32 0.11
 -9 4 -2 0.06 0.02
 9 4 2 0.26 0.11
 -9 -4 -2 0.05 0.03
 9 -4 2 0.08 0.05
 9 4 3 0.02 0.04
 9 -4 3 0.01 0.05
 -9 -4 -3 -0.02 0.02
 9 -4 4 0.26 0.14
 9 5 -11 0.93 0.17
 9 -5 -11 0.93 0.17
 9 5 -10 0.22 0.13
 9 -5 -10 0.21 0.14
 -9 5 9 0.4 0.11
 9 5 -9 0.64 0.14
 9 -5 -9 0.67 0.14
 9 5 -8 0.03 0.04
 -9 5 8 -0.02 0.02
 9 -5 -8 0.19 0.11
 -9 -5 8 -0.01 0.02
 9 5 -7 5.97 0.41
 -9 5 7 5.58 0.39
 9 -5 -7 5.33 0.37
 9 -5 -7 5.92 0.41
 -9 -5 7 5.86 0.39
 9 5 -6 0.29 0.1
 -9 5 6 0.33 0.1
 9 -5 -6 0.26 0.08
 -9 -5 6 0.37 0.1
 9 -5 -6 0.37 0.12
 -9 5 5 0.32 0.1
 9 5 -5 0.55 0.1
 9 -5 -5 0.36 0.08
 -9 -5 5 0.6 0.11
 9 -5 -5 0.53 0.11
 -9 5 4 0.87 0.12
 9 5 -4 0.97 0.13
 -9 -5 4 1.04 0.12
 9 -5 -4 0.72 0.12
 9 -5 -4 0.9 0.1
 -9 5 3 1.23 0.13
 9 5 -3 1.09 0.13
 9 -5 -3 1.19 0.14
 -9 -5 3 1.18 0.13
 9 -5 -3 1.14 0.11
 9 5 -2 0.14 0.09
 -9 5 2 0.02 0.02
 -9 -5 2 0.03 0.02
 9 -5 -2 0.12 0.06
 9 -5 -2 0.04 0.04
 -9 5 1 5.51 0.37
 9 5 -1 5.2 0.37
 -9 -5 1 5.62 0.37
 9 -5 -1 4.91 0.34
 9 -5 -1 5.27 0.38
 -9 5 0 0.43 0.09
 9 5 0 0.54 0.11
 9 -5 0 0.37 0.11
 -9 -5 0 0.2 0.11
 9 -5 0 0.44 0.08
 9 5 1 0.04 0.04
 -9 5 -1 0.03 0.02
 -9 -5 -1 0.03 0.03
 9 -5 1 0.15 0.08
 9 -5 1 0.06 0.05
 -9 5 -2 0.31 0.09
 9 5 2 0.41 0.11
 -9 -5 -2 0.34 0.11
 9 -5 2 0.38 0.13
 9 5 3 0.34 0.11
 9 -5 3 0.38 0.13
 -9 -5 -3 0.23 0.11
 9 5 4 0.03 0.05
 9 -5 4 -0.04 0.04
 9 6 -11 0.02 0.06
 9 -6 -11 0.03 0.06
 9 6 -10 0.31 0.14
 9 -6 -10 0.21 0.12
 -9 6 9 0.12 0.09
 9 6 -9 0.03 0.05
 9 -6 -9 0.18 0.09
 9 -6 -9 0.28 0.13
 -9 6 8 0.18 0.1
 9 6 -8 0.01 0.04
 9 -6 -8 0.11 0.08
 -9 -6 8 0.11 0.09
 9 -6 -8 0.29 0.12
 -9 6 7 0.48 0.11
 9 6 -7 0.68 0.11
 9 -6 -7 0.49 0.12
 9 -6 -7 0.42 0.09
 -9 -6 7 0.4 0.1
 -9 6 6 0.37 0.1
 9 6 -6 0.34 0.1
 -9 -6 6 0.36 0.1
 9 -6 -6 0.41 0.08
 9 -6 -6 0.4 0.11
 9 6 -5 0.26 0.09
 -9 6 5 0.17 0.09
 9 -6 -5 0.13 0.07
 9 -6 -5 0.18 0.09
 -9 -6 5 0.29 0.09
 9 6 -4 0.8 0.12
 -9 6 4 1.02 0.12
 9 -6 -4 0.95 0.13
 -9 -6 4 0.71 0.12
 9 -6 -4 0.92 0.1
 -9 6 3 0.48 0.11
 9 6 -3 0.56 0.11
 9 -6 -3 0.57 0.08
 -9 -6 3 0.54 0.1
 9 -6 -3 0.51 0.11
 9 6 -2 0.02 0.03
 -9 6 2 0 0.02
 9 -6 -2 0.01 0.02
 9 -6 -2 0.06 0.04
 -9 -6 2 0.02 0.02
 9 6 -1 0.15 0.08
 9 -6 -1 0.15 0.07
 9 -6 -1 0.13 0.09
 9 6 0 0.21 0.09
 -9 6 0 0.12 0.08
 9 -6 0 0.07 0.03
 -9 -6 0 0.13 0.09
 9 -6 0 0.21 0.11
 9 6 1 0.34 0.1
 -9 6 -1 0.12 0.09
 9 -6 1 0.23 0.08
 9 -6 1 0.17 0.11
 -9 -6 -1 0.22 0.11
 -9 6 -2 0.12 0.09
 9 6 2 0.04 0.04
 -9 -6 -2 0.03 0.03
 9 -6 2 0.16 0.12
 9 -6 2 0 0.03
 9 6 3 0.17 0.1
 -9 -6 -3 0.5 0.12
 9 -6 3 0.28 0.1
 9 -6 3 0.14 0.06
 9 6 4 0.07 0.05
 9 -6 4 0.03 0.05
 9 7 -11 0.03 0.06
 9 -7 -11 -0.02 0.04
 9 -7 -11 0.03 0.06
 9 7 -10 0.13 0.06
 9 -7 -10 0.09 0.04
 9 -7 -10 0.35 0.13
 -9 7 9 -0.02 0.02
 9 7 -9 0.23 0.12
 9 -7 -9 0.06 0.04
 9 -7 -9 0.03 0.05
 -9 7 8 0.22 0.1
 9 7 -8 0.27 0.11
 9 -7 -8 0.3 0.11
 9 -7 -8 0.24 0.09
 -9 -7 8 0.29 0.09
 9 7 -7 0.16 0.09
 -9 7 7 0.02 0.02
 9 -7 -7 0.04 0.04
 -9 -7 7 -0.01 0.02
 9 -7 -7 0.03 0.03
 9 7 -6 0.01 0.03
 -9 7 6 0 0.02
 9 -7 -6 0.02 0.04
 -9 -7 6 0.02 0.02
 9 -7 -6 -0.02 0.02
 -9 7 5 1.47 0.15
 9 7 -5 1.66 0.15
 -9 -7 5 1.64 0.15
 9 -7 -5 1.3 0.13
 9 -7 -5 1.36 0.16
 -9 7 4 0 0.02
 9 7 -4 0.01 0.03
 -9 -7 4 -0.01 0.02
 9 -7 -4 0.04 0.04
 9 -7 -4 0.06 0.03
 -9 7 3 0.02 0.02
 9 7 -3 -0.02 0.03
 9 -7 -3 0.03 0.03
 -9 -7 3 0 0.02
 9 -7 -3 0.02 0.04
 9 7 -2 -0.02 0.03
 -9 7 2 0 0.02
 9 -7 -2 0.05 0.04
 -9 -7 2 0 0.02
 9 -7 -2 0.04 0.03
 9 7 -1 0.04 0.04
 -9 7 1 0.03 0.02
 9 -7 -1 0.14 0.1
 -9 -7 1 0.04 0.03
 9 -7 -1 0.07 0.03
 9 7 0 0.48 0.1
 -9 7 0 0.43 0.1
 9 -7 0 0.46 0.09
 -9 -7 0 0.37 0.11
 9 -7 0 0.57 0.12
 9 7 1 1.24 0.15
 -9 7 -1 1.18 0.14
 9 -7 1 1.21 0.14
 -9 -7 -1 1.46 0.15
 9 -7 1 1.3 0.17
 9 7 2 0.05 0.04
 9 -7 2 0.03 0.03
 9 -7 2 0.16 0.12
 -9 -7 -2 0.05 0.03
 9 7 3 0.25 0.11
 -9 -7 -3 0.26 0.11
 9 -7 3 0.56 0.15
 9 -7 3 0.14 0.1
 9 7 4 -0.01 0.05
 9 -7 4 -0.05 0.03
 9 -7 4 0.03 0.05
 9 8 -10 0.79 0.16
 -9 8 10 0.41 0.11
 9 -8 -10 0.58 0.14
 9 -8 -10 0.69 0.12
 9 8 -9 0.49 0.13
 -9 8 9 0.36 0.11
 9 -8 -9 0.37 0.1
 9 -8 -9 0.56 0.13
 -9 8 8 1.94 0.17
 9 8 -8 1.26 0.17
 9 -8 -8 1.55 0.15
 9 -8 -8 1.71 0.18
 9 8 -7 0.25 0.1
 9 -8 -7 0.04 0.03
 -9 -8 7 0.17 0.09
 9 -8 -7 0.15 0.11
 9 8 -6 0.58 0.11
 -9 8 6 0.84 0.12
 9 -8 -6 0.79 0.13
 9 -8 -6 0.73 0.1
 -9 -8 6 0.71 0.11
 -9 8 5 2.79 0.22
 9 8 -5 2.54 0.22
 -9 -8 5 2.69 0.21
 9 -8 -5 2.7 0.23
 9 -8 -5 2.65 0.2
 9 8 -4 1.79 0.17
 -9 8 4 2.13 0.18
 9 -8 -4 2.12 0.19
 9 -8 -4 1.77 0.16
 -9 -8 4 1.84 0.18
 -9 8 3 0.02 0.02
 9 8 -3 -0.02 0.03
 9 -8 -3 -0.01 0.02
 9 -8 -3 -0.03 0.03
 -9 -8 3 0.01 0.02
 9 8 -2 3.44 0.25
 -9 8 2 3.34 0.25
 -9 -8 2 3.14 0.25
 9 -8 -2 3.08 0.23
 9 -8 -2 3.19 0.26
 9 8 -1 1.31 0.15
 -9 8 1 1.49 0.15
 9 -8 -1 1.43 0.16
 -9 -8 1 1.63 0.16
 9 -8 -1 1.46 0.14
 -9 8 0 0 0.02
 9 8 0 0.03 0.04
 -9 -8 0 0.2 0.11
 9 -8 0 -0.04 0.04
 9 -8 0 0.01 0.03
 -9 8 -1 0.01 0.02
 9 8 1 0.12 0.09
 9 -8 1 0 0.05
 -9 -8 -1 0.03 0.03
 9 -8 1 0.14 0.09
 9 8 2 0.02 0.04
 9 -8 2 0.16 0.12
 -9 -8 -2 0.19 0.11
 9 8 3 0.02 0.04
 -9 -8 -3 -0.02 0.02
 9 -8 3 -0.03 0.03
 9 -8 3 0.06 0.05
 9 9 -10 0.2 0.13
 9 -9 -10 0.31 0.13
 -9 9 9 1.32 0.16
 9 9 -9 1.37 0.18
 9 -9 -9 1.55 0.18
 9 -9 -9 1.44 0.15
 -9 9 8 0.69 0.11
 9 9 -8 0.56 0.12
 9 -9 -8 0.51 0.11
 9 -9 -8 0.6 0.13
 9 9 -7 1.52 0.16
 -9 9 7 1.32 0.15
 9 -9 -7 1.32 0.17
 -9 -9 7 1.44 0.14
 9 -9 -7 1.09 0.13
 -9 9 6 0.16 0.1
 9 9 -6 0.04 0.04
 -9 -9 6 0 0.02
 9 -9 -6 0.06 0.04
 9 -9 -6 -0.01 0.02
 9 9 -5 1.68 0.17
 -9 9 5 2.06 0.18
 9 -9 -5 2.05 0.17
 9 -9 -5 2.34 0.2
 -9 -9 5 1.71 0.17
 -9 9 4 0.03 0.02
 9 9 -4 0.04 0.03
 -9 -9 4 0.15 0.1
 9 -9 -4 0.11 0.07
 9 -9 -4 -0.01 0.04
 9 9 -3 2.25 0.18
 -9 9 3 2.1 0.18
 -9 -9 3 2.44 0.19
 9 -9 -3 1.78 0.17
 9 -9 -3 1.85 0.19
 9 9 -2 0.28 0.09
 -9 9 2 0.44 0.1
 -9 -9 2 0.4 0.1
 9 -9 -2 0.46 0.09
 9 -9 -2 0.43 0.11
 9 9 -1 1.26 0.14
 -9 9 1 1.34 0.14
 9 -9 -1 1.35 0.16
 -9 -9 1 1.48 0.16
 9 -9 -1 1.29 0.14
 -9 9 0 1.02 0.13
 9 9 0 1.17 0.13
 9 -9 0 1.11 0.16
 9 -9 0 1.07 0.13
 -9 -9 0 1.4 0.16
 -9 9 -1 0.96 0.13
 9 9 1 1.4 0.15
 9 -9 1 1.19 0.17
 -9 -9 -1 1.48 0.16
 9 -9 1 0.97 0.14
 -9 -9 -2 0.46 0.13
 9 -9 2 0.61 0.14
 9 -9 2 0.31 0.12
 9 -9 3 0.47 0.12
 9 -9 3 0.48 0.15
 -9 -9 -3 0.83 0.14
 9 10 -10 0.18 0.12
 -9 10 10 0.01 0.02
 9 -10 -10 0.04 0.04
 9 -10 -10 0.03 0.05
 9 10 -9 0.06 0.05
 -9 10 9 0.04 0.03
 9 -10 -9 0.14 0.1
 9 -10 -9 0.21 0.11
 9 10 -8 0.2 0.1
 -9 10 8 0.29 0.11
 9 -10 -8 0.07 0.05
 9 -10 -8 0.22 0.09
 -9 10 7 1.29 0.14
 9 10 -7 0.95 0.13
 9 -10 -7 0.87 0.13
 -9 -10 7 1.13 0.13
 9 -10 -7 1.38 0.16
 -9 10 6 0.99 0.13
 9 10 -6 0.69 0.11
 9 -10 -6 0.92 0.12
 9 -10 -6 1.22 0.14
 -9 -10 6 0.67 0.12
 9 10 -5 0.28 0.09
 -9 10 5 0.44 0.1
 9 -10 -5 0.39 0.09
 -9 -10 5 0.45 0.1
 9 -10 -5 0.36 0.11
 9 10 -4 0.35 0.09
 -9 10 4 0.69 0.12
 -9 -10 4 0.55 0.11
 9 -10 -4 0.61 0.12
 9 -10 -4 0.49 0.09
 9 10 -3 2.4 0.21
 -9 10 3 2.75 0.21
 9 -10 -3 2.38 0.2
 -9 -10 3 2.78 0.22
 9 -10 -3 2.68 0.23
 9 10 -2 0.1 0.08
 -9 10 2 0.14 0.1
 -9 -10 2 0.24 0.1
 9 -10 -2 0.17 0.08
 9 -10 -2 0.2 0.11
 9 10 -1 0.22 0.08
 -9 10 1 0.36 0.1
 9 -10 -1 0.16 0.1
 9 -10 -1 0.18 0.09
 -9 -10 1 0.24 0.1
 -9 10 0 0.15 0.09
 9 10 0 0.21 0.09
 9 -10 0 0.17 0.11
 9 -10 0 0.13 0.09
 -9 -10 0 0.24 0.11
 -9 10 -1 2.14 0.19
 9 -10 1 2.04 0.19
 -9 -10 -1 2.15 0.2
 9 -10 1 2.12 0.22
 9 -10 2 1.15 0.18
 9 -10 2 0.83 0.14
 -9 -10 -2 1.18 0.16
 9 -10 3 0.36 0.12
 9 -10 3 0.21 0.13
 -9 -10 -3 0.56 0.12
 -9 11 10 0.05 0.03
 9 11 -10 0.34 0.14
 9 -11 -10 0.05 0.04
 9 -11 -10 0.11 0.06
 9 11 -9 0.45 0.12
 9 -11 -9 0.37 0.11
 9 -11 -9 0.41 0.12
 9 11 -8 0.17 0.11
 9 -11 -8 0.13 0.11
 9 -11 -8 0.2 0.09
 9 11 -7 2.41 0.23
 -9 11 7 3.24 0.24
 -9 -11 7 2.72 0.22
 9 -11 -7 2.88 0.22
 9 -11 -7 3.01 0.25
 9 11 -6 0.99 0.13
 -9 11 6 1.13 0.14
 9 -11 -6 0.84 0.12
 -9 -11 6 1.01 0.13
 9 -11 -6 1.2 0.15
 9 11 -5 0.4 0.1
 -9 11 5 0.63 0.11
 -9 -11 5 0.54 0.11
 9 -11 -5 0.64 0.12
 9 -11 -5 0.79 0.11
 9 11 -4 0.01 0.03
 -9 11 4 0.16 0.09
 9 -11 -4 0.13 0.08
 9 -11 -4 0.04 0.04
 -9 -11 4 0.2 0.1
 -9 11 3 2.61 0.21
 9 11 -3 2.31 0.2
 9 -11 -3 2.4 0.22
 9 -11 -3 2.58 0.2
 -9 -11 3 2.51 0.21
 9 11 -2 0.41 0.09
 -9 11 2 0.38 0.1
 9 -11 -2 0.42 0.12
 9 -11 -2 0.48 0.1
 -9 -11 2 0.53 0.11
 -9 11 1 2 0.18
 9 11 -1 1.98 0.18
 -9 -11 1 2.61 0.2
 9 -11 -1 2.11 0.19
 9 -11 -1 2.15 0.2
 -9 11 0 0.17 0.09
 9 -11 0 0.17 0.12
 -9 -11 0 0.2 0.11
 -9 11 -1 0.02 0.02
 9 -11 1 0.14 0.1
 9 -11 1 0.05 0.05
 -9 -11 -1 0.02 0.03
 9 -11 2 0.24 0.14
 9 -11 2 0.21 0.11
 -9 -11 -2 0.29 0.13
 -9 -11 -3 0.01 0.03
 9 -11 3 0.04 0.05
 9 -11 3 -0.06 0.03
 -9 12 10 0.13 0.11
 9 12 -10 0.32 0.12
 9 -12 -10 0.32 0.13
 9 -12 -10 0.19 0.11
 -9 12 9 0.56 0.12
 9 12 -9 0.49 0.13
 9 -12 -9 0.49 0.12
 9 -12 -9 0.6 0.12
 9 12 -8 0.25 0.11
 9 -12 -8 0.24 0.12
 9 12 -7 0.24 0.1
 -9 12 7 0.36 0.12
 -9 -12 7 0.19 0.09
 9 -12 -7 0.32 0.1
 9 -12 -7 0.29 0.11
 9 12 -6 -0.02 0.03
 -9 12 6 0.18 0.11
 9 -12 -6 -0.03 0.04
 9 -12 -6 -0.03 0.03
 -9 -12 6 0.01 0.02
 -9 12 5 0.21 0.1
 9 12 -5 0.18 0.08
 9 -12 -5 0.17 0.11
 9 -12 -5 0.11 0.08
 -9 -12 5 0.25 0.1
 -9 12 4 0.3 0.1
 9 12 -4 0.19 0.08
 9 -12 -4 0.36 0.09
 9 -12 -4 0.3 0.11
 -9 -12 4 0.24 0.1
 9 12 -3 0.77 0.11
 -9 12 3 0.93 0.13
 -9 -12 3 0.98 0.13
 9 -12 -3 0.76 0.12
 9 -12 -3 0.93 0.14
 -9 12 2 0.01 0.02
 -9 -12 2 0.05 0.03
 9 -12 -2 0.17 0.1
 9 -12 -2 0.07 0.04
 -9 12 1 1.67 0.17
 -9 -12 1 1.69 0.18
 9 -12 -1 1.79 0.18
 9 -12 -1 1.58 0.16
 -9 12 0 0 0.02
 9 -12 0 0.01 0.04
 9 -12 0 0.01 0.04
 -9 -12 0 0.01 0.03
 -9 12 -1 0.01 0.02
 -9 -12 -1 0.18 0.11
 9 -12 1 0.02 0.05
 9 -12 1 0.02 0.04
 9 -12 2 0.02 0.05
 9 -12 2 0.08 0.05
 -9 -12 -2 0.03 0.03
 9 -12 3 0.25 0.13
 -9 -12 -3 0.5 0.13
 9 -12 3 0.29 0.12
 -9 13 10 0.54 0.12
 9 13 -10 0.4 0.14
 9 -13 -10 0.62 0.13
 9 -13 -10 0.44 0.14
 9 13 -9 -0.03 0.04
 -9 13 9 0.17 0.09
 9 -13 -9 0.18 0.11
 9 -13 -9 0.09 0.05
 9 13 -8 0.13 0.1
 -9 13 8 0.14 0.11
 9 -13 -8 0.04 0.05
 9 -13 -8 0.15 0.11
 9 13 -7 0.03 0.04
 -9 13 7 0.2 0.11
 9 -13 -7 0.19 0.09
 9 -13 -7 0.22 0.1
 9 13 -6 0.05 0.04
 -9 13 6 0.03 0.02
 -9 -13 6 0.02 0.02
 9 -13 -6 0.01 0.03
 9 -13 -6 0.02 0.04
 -9 13 5 3.95 0.3
 9 13 -5 3.6 0.28
 -9 -13 5 4.1 0.29
 9 -13 -5 4.1 0.3
 9 -13 -5 3.88 0.28
 -9 13 4 0.39 0.11
 -9 -13 4 0.23 0.09
 9 -13 -4 0.33 0.09
 9 -13 -4 0.21 0.11
 -9 13 3 1.61 0.17
 9 -13 -3 1.56 0.18
 9 -13 -3 1.5 0.15
 -9 -13 3 1.46 0.16
 -9 13 2 0.53 0.12
 -9 -13 2 0.78 0.12
 9 -13 -2 0.64 0.11
 9 -13 -2 0.6 0.13
 9 -13 -1 0.26 0.1
 9 -13 -1 0.14 0.11
 -9 13 0 0.29 0.1
 9 -13 0 0.55 0.13
 9 -13 0 0.17 0.11
 -9 -13 0 0.34 0.11
 -9 13 -1 0.02 0.02
 -9 -13 -1 0.22 0.12
 9 -13 1 0.04 0.05
 9 -13 1 0.04 0.04
 9 -13 2 0.02 0.04
 9 -13 2 -0.04 0.05
 -9 -13 -2 0 0.03
 9 -13 3 -0.01 0.05
 9 -13 3 0.02 0.05
 -9 -13 -3 0.01 0.03
 -9 14 9 -0.02 0.02
 9 14 -9 0 0.05
 9 -14 -9 0.18 0.11
 9 -14 -9 0.06 0.05
 9 14 -8 0.02 0.04
 -9 14 8 0 0.02
 9 -14 -8 0.02 0.04
 9 -14 -8 0.01 0.04
 9 14 -7 0.05 0.04
 -9 14 7 0.21 0.11
 9 -14 -7 0.02 0.04
 9 -14 -7 0.18 0.11
 -9 14 6 0.45 0.11
 9 -14 -6 0.28 0.12
 9 -14 -6 0.22 0.1
 -9 -14 6 0.29 0.1
 -9 14 5 0.53 0.12
 9 -14 -5 0.52 0.12
 9 -14 -5 0.57 0.11
 -9 -14 5 0.47 0.11
 -9 14 4 0.04 0.02
 9 -14 -4 0.03 0.04
 9 -14 -4 0.02 0.03
 -9 -14 4 0 0.02
 -9 14 3 0 0.02
 -9 -14 3 -0.01 0.02
 9 -14 -3 0 0.03
 9 -14 -3 0 0.04
 -9 14 2 0.02 0.02
 9 -14 -2 0.01 0.03
 -9 -14 2 -0.03 0.02
 9 -14 -2 0.05 0.04
 -9 14 1 0.44 0.11
 9 -14 -1 0.6 0.13
 9 -14 -1 0.54 0.11
 -9 -14 1 0.42 0.12
 -9 14 0 -0.01 0.02
 -9 -14 0 0.03 0.03
 9 -14 0 -0.03 0.03
 9 -14 0 0.03 0.05
 9 -14 1 0.37 0.14
 9 -14 1 0.45 0.13
 -9 -14 -1 0.41 0.13
 9 -14 2 0.04 0.05
 -9 -14 -2 -0.01 0.03
 9 -14 2 -0.01 0.04
 -9 15 9 0.39 0.12
 9 -15 -9 0.6 0.13
 9 -15 -9 0.42 0.12
 -9 15 8 0.24 0.12
 9 -15 -8 0.49 0.12
 9 -15 -8 0.44 0.12
 -9 15 7 0.94 0.14
 9 -15 -7 1.1 0.15
 9 -15 -7 1.23 0.14
 -9 15 6 0.69 0.13
 9 -15 -6 0.85 0.13
 -9 -15 6 0.9 0.13
 9 -15 -6 0.93 0.14
 -9 15 5 0.5 0.13
 9 -15 -5 0.46 0.11
 9 -15 -5 0.3 0.12
 -9 -15 5 0.19 0.1
 -9 15 4 -0.02 0.02
 9 -15 -4 0 0.04
 -9 -15 4 -0.02 0.02
 9 -15 -4 -0.01 0.03
 -9 15 3 0.4 0.12
 9 -15 -3 0.25 0.1
 9 -15 -3 0.33 0.11
 -9 -15 3 0.28 0.1
 -9 15 2 0 0.02
 -9 -15 2 0.19 0.11
 9 -15 -2 0.05 0.04
 9 -15 -2 0.18 0.1
 -9 15 1 0.23 0.1
 -9 -15 1 0.13 0.11
 9 -15 -1 0.32 0.13
 9 -15 -1 0.25 0.11
 -9 15 0 -0.01 0.02
 -9 -15 0 0.04 0.03
 9 -15 0 0 0.04
 9 -15 0 0 0.04
 -9 -15 -1 0.23 0.13
 9 -15 1 0.31 0.13
 9 -15 1 0.27 0.12
 -9 -15 -2 0.02 0.03
 9 -15 2 -0.03 0.05
 9 -15 2 -0.03 0.04
 -9 16 9 0.02 0.02
 9 -16 -9 0.07 0.05
 9 -16 -9 0.03 0.05
 -9 16 8 0.27 0.12
 9 -16 -8 0.43 0.12
 9 -16 -8 0.31 0.12
 -9 16 7 0.02 0.03
 9 -16 -7 0.05 0.05
 9 -16 -7 0.02 0.04
 -9 16 6 0.01 0.02
 -9 -16 6 0.04 0.02
 9 -16 -6 0.13 0.11
 9 -16 -6 0.03 0.04
 -9 16 5 0.01 0.03
 -9 -16 5 0.02 0.02
 9 -16 -5 -0.01 0.03
 9 -16 -5 -0.01 0.04
 -9 16 4 0.22 0.1
 -9 -16 4 0 0.02
 9 -16 -4 0.02 0.04
 9 -16 -4 0.03 0.04
 -9 16 3 0.38 0.11
 9 -16 -3 0.36 0.11
 -9 -16 3 0.3 0.11
 9 -16 -3 0.25 0.12
 -9 16 2 0.25 0.11
 9 -16 -2 0.3 0.11
 9 -16 -2 0.35 0.11
 -9 -16 2 0.3 0.12
 -9 16 1 0.01 0.02
 9 -16 -1 0.2 0.12
 -9 -16 1 0.02 0.03
 9 -16 -1 0.05 0.04
 -9 16 0 -0.01 0.02
 9 -16 0 0.04 0.04
 9 -16 0 -0.02 0.05
 -9 -16 0 0.02 0.03
 9 -16 1 0.15 0.12
 -9 -16 -1 0.04 0.04
 9 -16 1 0.3 0.13
 9 -16 2 -0.02 0.05
 9 -16 2 -0.02 0.05
 -9 -16 -2 0.01 0.03
 -9 17 8 0.02 0.02
 9 -17 -8 -0.01 0.04
 9 -17 -8 0.07 0.04
 -9 17 7 0.07 0.03
 9 -17 -7 0.26 0.1
 9 -17 -7 0.12 0.05
 -9 17 6 0 0.02
 9 -17 -6 0.01 0.04
 -9 -17 6 0.26 0.1
 9 -17 -6 0.06 0.04
 -9 17 5 1.98 0.19
 9 -17 -5 1.6 0.18
 9 -17 -5 1.82 0.18
 -9 -17 5 1.86 0.18
 -9 17 4 0.58 0.13
 9 -17 -4 0.46 0.12
 9 -17 -4 0.46 0.11
 -9 -17 4 0.53 0.12
 -9 17 3 1.94 0.19
 9 -17 -3 1.94 0.2
 9 -17 -3 2.09 0.19
 -9 -17 3 1.97 0.19
 -9 17 2 0.02 0.02
 -9 -17 2 0.01 0.03
 9 -17 -2 -0.03 0.04
 9 -17 -2 0.02 0.04
 -9 17 1 0.05 0.03
 9 -17 -1 0.38 0.12
 9 -17 -1 0.16 0.1
 -9 -17 1 0.08 0.04
 -9 17 0 0.47 0.12
 -9 -17 0 0.44 0.14
 9 -17 0 0.22 0.12
 9 -17 0 0.56 0.13
 9 -17 1 0.32 0.14
 9 -17 1 0.31 0.13
 9 -17 2 0.01 0.05
 -9 -17 -2 0.02 0.04
 9 -17 2 -0.05 0.04
 -9 18 8 0.02 0.03
 9 -18 -8 -0.04 0.04
 9 -18 -8 -0.02 0.04
 -9 18 7 0.16 0.12
 9 -18 -7 0.32 0.12
 9 -18 -7 0.12 0.05
 -9 18 6 0.84 0.14
 9 -18 -6 0.75 0.14
 9 -18 -6 0.83 0.14
 -9 -18 6 0.62 0.12
 -9 18 5 0.01 0.02
 9 -18 -5 0.02 0.04
 9 -18 -5 0 0.04
 -9 -18 5 0.01 0.03
 -9 18 4 0.42 0.13
 9 -18 -4 0.47 0.12
 9 -18 -4 0.4 0.11
 -9 -18 4 0.5 0.12
 -9 18 3 0.04 0.03
 9 -18 -3 0.06 0.05
 -9 -18 3 0.01 0.03
 9 -18 -3 0.04 0.04
 -9 18 2 1.71 0.18
 9 -18 -2 1.43 0.18
 -9 -18 2 2.26 0.2
 9 -18 -2 1.63 0.19
 -9 18 1 0.58 0.12
 9 -18 -1 0.81 0.14
 -9 -18 1 0.67 0.15
 9 -18 -1 0.7 0.14
 -9 18 0 0.19 0.1
 9 -18 0 0.07 0.05
 -9 -18 0 0.03 0.03
 9 -18 0 0.17 0.12
 -9 -18 -1 0.89 0.17
 9 -18 1 0.87 0.16
 9 -18 1 0.99 0.17
 9 -19 -8 0.17 0.11
 9 -19 -7 0.14 0.11
 9 -19 -7 -0.02 0.04
 9 -19 -6 0.05 0.04
 9 -19 -6 0.23 0.11
 -9 -19 6 0.24 0.1
 -9 19 5 -0.01 0.02
 9 -19 -5 0.01 0.04
 9 -19 -5 -0.01 0.04
 -9 -19 5 0.02 0.02
 -9 19 4 0.24 0.12
 9 -19 -4 0.16 0.11
 9 -19 -4 0.26 0.11
 -9 19 3 0.01 0.03
 -9 -19 3 -0.02 0.03
 9 -19 -3 -0.02 0.04
 9 -19 -3 0.19 0.12
 -9 19 2 1.44 0.17
 9 -19 -2 1.47 0.17
 9 -19 -2 1.58 0.18
 -9 -19 2 1.52 0.18
 -9 19 1 0.06 0.03
 9 -19 -1 0.25 0.12
 9 -19 -1 0.02 0.04
 -9 -19 1 0 0.03
 -9 19 0 -0.01 0.02
 9 -19 0 0.29 0.13
 9 -19 0 0 0.04
 -9 -19 0 0.06 0.04
 -9 -19 -1 0.68 0.16
 9 -19 1 0.49 0.15
 9 -19 1 0.47 0.15
 -9 20 7 0.32 0.13
 9 -20 -7 0.22 0.11
 -9 20 6 0.04 0.03
 9 -20 -6 0 0.04
 -9 20 5 0.02 0.03
 9 -20 -5 -0.01 0.04
 9 -20 -5 0.21 0.11
 -9 -20 5 0 0.02
 -9 20 4 0.27 0.12
 9 -20 -4 0.37 0.12
 9 -20 -4 0.24 0.11
 -9 -20 4 0.42 0.12
 -9 20 3 -0.01 0.02
 9 -20 -3 0 0.04
 -9 -20 3 -0.02 0.03
 9 -20 -3 -0.01 0.04
 -9 20 2 0.29 0.12
 9 -20 -2 0.45 0.13
 -9 -20 2 0.37 0.14
 9 -20 -2 0.38 0.12
 -9 20 1 0.63 0.13
 -9 -20 1 0.64 0.16
 9 -20 -1 0.98 0.15
 9 -20 -1 0.86 0.14
 9 -20 0 1.27 0.18
 -9 -20 0 1.63 0.19
 9 -20 0 1.15 0.17
 -9 21 7 0.17 0.12
 9 -21 -7 0.07 0.05
 -9 21 6 0.18 0.12
 9 -21 -6 0.28 0.12
 9 -21 -5 0.26 0.12
 -9 -21 5 0.23 0.11
 -9 21 4 0.01 0.03
 9 -21 -4 0.04 0.04
 9 -21 -4 0.07 0.05
 -9 -21 4 0 0.03
 -9 21 3 -0.02 0.03
 9 -21 -3 0.04 0.04
 -9 -21 3 -0.02 0.03
 9 -21 -3 0.2 0.11
 -9 21 2 0.38 0.13
 9 -21 -2 0.33 0.12
 9 -21 -2 0.49 0.13
 -9 -21 2 0.48 0.15
 9 -21 -1 0.33 0.13
 -9 -21 1 0.69 0.16
 9 -21 0 1.34 0.18
 -9 -21 0 1.41 0.19
 9 -21 0 1.39 0.18
 -9 22 6 0 0.03
 9 -22 -6 0.01 0.04
 -9 22 5 0.06 0.03
 -9 -22 5 0.01 0.03
 9 -22 -5 0.06 0.05
 -9 22 4 0.41 0.14
 -9 -22 4 0.5 0.12
 9 -22 -4 0.56 0.13
 -9 22 3 0.45 0.13
 9 -22 -3 0.26 0.13
 -9 -22 3 0.66 0.13
 -9 22 2 0.38 0.13
 -9 -22 2 0.61 0.14
 9 -22 -2 0.59 0.14
 9 -22 -2 0.56 0.14
 -9 22 1 -0.01 0.03
 9 -22 -1 0.04 0.05
 -9 -22 1 0.03 0.03
 9 -22 -1 -0.03 0.04
 -9 23 5 0.03 0.03
 -9 -23 5 0.02 0.03
 9 -23 -5 0.36 0.13
 -9 23 4 0.44 0.15
 -9 -23 4 0.68 0.13
 9 -23 -4 0.61 0.14
 -9 23 3 0.01 0.03
 -9 -23 3 0.02 0.03
 9 -23 -3 0.04 0.05
 -9 23 2 0.44 0.13
 -9 -23 2 0.79 0.16
 9 -23 -2 0.59 0.14
 10 0 -10 0 0.05
 -10 0 9 0 0.02
 10 0 -9 -0.03 0.04
 -10 0 8 1.47 0.16
 10 0 -8 1.62 0.19
 -10 0 7 0 0.02
 10 0 -7 -0.01 0.04
 10 0 -6 2.3 0.21
 -10 0 6 2.28 0.21
 10 0 -5 0.01 0.04
 -10 0 5 0.01 0.02
 10 0 -4 0.01 0.04
 -10 0 4 0.01 0.02
 10 0 -3 -0.03 0.04
 -10 0 3 0 0.02
 10 0 -2 0.71 0.14
 -10 0 2 0.85 0.14
 -10 0 1 -0.01 0.02
 10 0 -1 -0.05 0.04
 10 0 0 0.25 0.12
 -10 0 0 0.39 0.12
 -10 0 -1 -0.01 0.03
 10 0 1 0 0.04
 10 0 2 0.68 0.14
 -10 0 -2 0.35 0.12
 10 1 -10 0.73 0.16
 10 -1 -10 0.91 0.16
 -10 1 9 0.28 0.11
 10 1 -9 0.33 0.14
 10 -1 -9 0.58 0.14
 -10 -1 9 0.35 0.11
 -10 1 8 0.26 0.1
 10 1 -8 0.17 0.12
 10 1 -7 0 0.04
 -10 1 7 0.01 0.02
 -10 -1 7 0.01 0.02
 10 -1 -7 -0.08 0.04
 -10 1 6 0.21 0.1
 10 1 -6 0.05 0.05
 10 -1 -6 0.07 0.05
 -10 -1 6 0.27 0.1
 -10 1 5 0.24 0.1
 10 1 -5 0.27 0.11
 -10 -1 5 0.54 0.11
 10 -1 -5 0.24 0.11
 10 1 -4 1.07 0.15
 -10 1 4 1.22 0.14
 10 -1 -4 1.04 0.15
 -10 -1 4 1.45 0.15
 10 1 -3 0.26 0.11
 -10 1 3 0.47 0.11
 -10 -1 3 0.22 0.11
 10 -1 -3 0.22 0.11
 -10 1 2 1.13 0.14
 10 1 -2 0.98 0.15
 10 -1 -2 0.99 0.15
 -10 -1 2 1 0.14
 -10 1 1 0.37 0.11
 10 1 -1 0.26 0.11
 10 -1 -1 0.32 0.11
 -10 -1 1 0.42 0.11
 -10 1 0 0.46 0.12
 10 1 0 0.49 0.13
 10 -1 0 0.66 0.13
 -10 -1 0 0.67 0.13
 10 1 1 0.02 0.05
 -10 1 -1 -0.01 0.02
 10 -1 1 0.16 0.11
 -10 -1 -1 0.02 0.03
 -10 1 -2 0.16 0.11
 10 1 2 0.31 0.13
 10 -1 2 0.44 0.13
 -10 -1 -2 0.23 0.11
 10 2 -10 0.27 0.13
 10 -2 -10 0.04 0.05
 -10 2 9 0.02 0.02
 10 2 -9 0.04 0.05
 -10 -2 9 0 0.02
 10 -2 -9 0.04 0.05
 -10 2 8 0.51 0.11
 10 2 -8 0.46 0.13
 -10 -2 8 0.5 0.11
 10 -2 -8 0.74 0.14
 10 2 -7 0 0.04
 -10 2 7 0 0.02
 -10 -2 7 0 0.02
 10 -2 -7 0 0.05
 -10 2 6 1.08 0.14
 10 2 -6 0.74 0.14
 10 -2 -6 1.06 0.15
 -10 -2 6 0.74 0.13
 10 2 -5 2.48 0.23
 -10 2 5 2.98 0.23
 -10 -2 5 2.69 0.22
 10 -2 -5 2.36 0.23
 -10 2 4 3.44 0.25
 10 2 -4 2.53 0.26
 10 -2 -4 3.64 0.28
 -10 -2 4 3.21 0.25
 10 2 -3 0.17 0.1
 -10 2 3 0.3 0.1
 -10 -2 3 0.23 0.1
 10 -2 -3 0.13 0.11
 -10 2 2 1.14 0.15
 10 2 -2 1.03 0.15
 -10 -2 2 1.28 0.15
 10 -2 -2 1.21 0.16
 -10 2 1 0 0.02
 10 2 -1 0.02 0.04
 -10 -2 1 0.02 0.03
 10 -2 -1 0.03 0.04
 -10 2 0 0.97 0.13
 10 2 0 1.03 0.15
 -10 -2 0 0.99 0.14
 10 -2 0 0.91 0.15
 -10 2 -1 0 0.02
 10 2 1 -0.02 0.04
 10 -2 1 0.03 0.05
 -10 -2 -1 0.16 0.11
 -10 2 -2 0.35 0.12
 10 2 2 0.41 0.13
 10 -2 2 0.42 0.14
 10 3 -10 0.27 0.14
 10 -3 -10 0.03 0.05
 10 3 -9 0.07 0.05
 -10 3 9 0 0.02
 10 -3 -9 0.01 0.05
 -10 3 8 0.97 0.14
 10 3 -8 0.84 0.15
 -10 -3 8 0.99 0.13
 10 -3 -8 1.09 0.15
 10 3 -7 0.88 0.14
 -10 3 7 0.79 0.13
 -10 -3 7 0.9 0.13
 10 -3 -7 0.42 0.13
 10 3 -6 0.18 0.12
 -10 3 6 0.09 0.03
 -10 -3 6 0.39 0.1
 10 -3 -6 0.24 0.12
 10 3 -5 0.35 0.11
 -10 3 5 0.81 0.12
 10 -3 -5 0.74 0.13
 -10 -3 5 0.39 0.12
 -10 3 4 0.01 0.02
 10 3 -4 -0.04 0.04
 -10 -3 4 0 0.02
 10 -3 -4 -0.01 0.04
 -10 3 3 0.03 0.03
 10 3 -3 0.03 0.04
 10 -3 -3 0.03 0.04
 -10 -3 3 0.14 0.11
 10 3 -2 0.88 0.14
 -10 3 2 0.82 0.13
 10 -3 -2 0.79 0.14
 -10 -3 2 0.75 0.14
 10 3 -1 0.2 0.1
 -10 3 1 -0.03 0.02
 -10 -3 1 -0.01 0.03
 10 -3 -1 -0.03 0.04
 -10 3 0 0.61 0.12
 10 3 0 0.63 0.13
 -10 -3 0 0.6 0.14
 10 -3 0 0.8 0.15
 10 3 1 0.28 0.12
 10 -3 1 0.18 0.12
 10 3 2 0.03 0.05
 -10 3 -2 0.01 0.02
 -10 -3 -2 0.03 0.03
 10 -3 2 0 0.05
 10 4 -10 0.2 0.13
 10 -4 -10 0.3 0.15
 10 4 -9 0.18 0.12
 -10 4 9 0.05 0.03
 10 -4 -9 0.15 0.12
 10 4 -8 -0.04 0.04
 -10 4 8 0.01 0.02
 10 -4 -8 0.03 0.05
 -10 -4 8 0.21 0.1
 10 4 -7 0.2 0.11
 -10 4 7 0.36 0.1
 10 -4 -7 0.34 0.12
 -10 4 6 0.67 0.13
 10 4 -6 0.69 0.13
 10 -4 -6 0.84 0.14
 -10 -4 6 0.66 0.12
 10 4 -5 -0.05 0.03
 -10 4 5 -0.03 0.02
 -10 -4 5 0.02 0.02
 10 -4 -5 -0.05 0.04
 10 4 -4 1.44 0.18
 -10 4 4 2.01 0.18
 10 -4 -4 1.88 0.19
 -10 -4 4 1.77 0.18
 10 4 -3 1.21 0.16
 -10 4 3 1.35 0.16
 10 -4 -3 1.46 0.17
 -10 -4 3 1.67 0.17
 -10 4 2 2.29 0.19
 10 4 -2 1.8 0.19
 10 -4 -2 1.9 0.2
 -10 -4 2 1.89 0.19
 -10 4 1 0.24 0.11
 10 4 -1 0.16 0.1
 10 -4 -1 0.08 0.05
 -10 -4 1 0.19 0.12
 10 4 0 0.64 0.13
 -10 4 0 0.73 0.13
 -10 -4 0 0.6 0.13
 10 -4 0 0.63 0.14
 -10 4 -1 0.02 0.03
 10 4 1 0.19 0.1
 -10 -4 -1 0.05 0.03
 10 -4 1 0.08 0.06
 10 4 2 -0.05 0.04
 10 -4 2 0.03 0.05
 -10 -4 -2 0 0.03
 10 5 -10 0.01 0.05
 10 -5 -10 0.01 0.05
 10 5 -9 0.16 0.12
 -10 5 9 0.24 0.1
 10 -5 -9 0.33 0.13
 -10 5 8 -0.01 0.02
 10 5 -8 -0.01 0.04
 -10 -5 8 -0.02 0.02
 10 -5 -8 0 0.05
 10 5 -7 0.33 0.11
 -10 5 7 0.37 0.11
 10 -5 -7 0.48 0.13
 -10 -5 7 0.44 0.11
 10 5 -6 0.06 0.05
 -10 -5 6 0.18 0.11
 10 -5 -6 0.2 0.11
 10 5 -5 0.07 0.04
 -10 5 5 0.04 0.03
 -10 -5 5 0.04 0.03
 10 -5 -5 0.14 0.12
 10 5 -4 0.35 0.11
 -10 5 4 0.06 0.03
 10 -5 -4 0.1 0.05
 -10 -5 4 0.24 0.11
 10 5 -3 2.04 0.21
 -10 5 3 2.67 0.22
 -10 -5 3 2.67 0.22
 10 -5 -3 2.78 0.23
 -10 5 2 0.02 0.02
 10 5 -2 -0.01 0.04
 -10 -5 2 -0.02 0.03
 10 -5 -2 0.09 0.05
 10 5 -1 0.07 0.04
 -10 5 1 0.29 0.1
 10 -5 -1 0.23 0.11
 -10 5 0 0 0.02
 10 5 0 -0.01 0.04
 -10 -5 0 0.04 0.03
 10 -5 0 -0.02 0.05
 -10 5 -1 0.03 0.02
 10 5 1 0.01 0.04
 -10 -5 -1 0.01 0.03
 10 -5 1 0.02 0.05
 10 5 2 0.18 0.12
 -10 -5 -2 0.08 0.03
 10 -5 2 0.11 0.06
 -10 6 10 0.84 0.13
 10 6 -10 0.77 0.15
 10 -6 -10 0.62 0.15
 -10 6 9 0.15 0.1
 10 6 -9 0.07 0.05
 10 -6 -9 -0.05 0.04
 -10 6 8 -0.02 0.02
 10 6 -8 0.02 0.04
 -10 -6 8 -0.03 0.02
 10 -6 -8 0.03 0.05
 -10 6 7 -0.01 0.02
 10 6 -7 -0.02 0.04
 -10 -6 7 -0.01 0.02
 10 -6 -7 -0.04 0.04
 10 6 -6 0.17 0.11
 -10 -6 6 0.18 0.09
 10 -6 -6 0 0.04
 -10 6 5 0 0.02
 10 6 -5 -0.02 0.03
 10 -6 -5 -0.01 0.04
 -10 -6 5 0 0.02
 10 6 -4 0.02 0.04
 -10 6 4 -0.02 0.02
 -10 -6 4 -0.01 0.02
 10 -6 -4 -0.01 0.04
 -10 6 3 0.02 0.02
 10 6 -3 0 0.04
 10 -6 -3 0 0.04
 -10 -6 3 -0.01 0.02
 10 6 -2 0.09 0.05
 -10 6 2 0.18 0.11
 -10 -6 2 -0.02 0.03
 10 -6 -2 0.08 0.05
 -10 6 1 0.5 0.11
 10 6 -1 0.36 0.1
 -10 -6 1 0.41 0.13
 10 -6 -1 0.2 0.12
 -10 6 0 0.4 0.11
 10 6 0 0.58 0.13
 10 -6 0 0.52 0.14
 -10 -6 0 0.67 0.13
 10 6 1 0.02 0.04
 -10 6 -1 -0.01 0.02
 -10 -6 -1 0.15 0.11
 10 -6 1 0 0.05
 10 6 2 0.58 0.13
 -10 -6 -2 0.28 0.13
 10 -6 2 0.3 0.15
 -10 7 10 0.23 0.11
 10 7 -10 0.21 0.13
 10 -7 -10 0.36 0.15
 -10 7 9 0.41 0.11
 10 7 -9 0.34 0.13
 10 -7 -9 0.25 0.13
 -10 7 8 -0.02 0.02
 10 7 -8 0.06 0.05
 10 -7 -8 0.05 0.05
 -10 -7 8 -0.01 0.02
 -10 7 7 0.03 0.03
 10 7 -7 0.02 0.04
 -10 -7 7 0 0.02
 10 -7 -7 0.05 0.05
 10 7 -6 -0.04 0.04
 -10 7 6 -0.02 0.02
 -10 -7 6 -0.03 0.02
 10 -7 -6 -0.01 0.04
 -10 7 5 1.16 0.15
 10 7 -5 0.95 0.14
 10 -7 -5 1.31 0.16
 -10 -7 5 1.04 0.14
 -10 7 4 -0.02 0.02
 10 7 -4 -0.02 0.04
 10 -7 -4 -0.03 0.04
 -10 -7 4 -0.02 0.02
 10 7 -3 0.23 0.1
 -10 7 3 0.01 0.02
 10 -7 -3 0.07 0.05
 -10 -7 3 0.08 0.03
 -10 7 2 0.28 0.1
 10 7 -2 0.34 0.11
 -10 -7 2 0.35 0.12
 10 -7 -2 0.27 0.12
 10 7 -1 0.03 0.04
 -10 7 1 0.03 0.02
 -10 -7 1 0.25 0.12
 10 -7 -1 0.01 0.04
 -10 7 0 -0.01 0.02
 10 7 0 -0.01 0.04
 -10 -7 0 0.2 0.11
 10 -7 0 0.06 0.05
 10 7 1 0.01 0.04
 -10 7 -1 0 0.02
 10 -7 1 -0.01 0.05
 -10 -7 -1 0.01 0.03
 10 7 2 0.03 0.05
 10 -7 2 -0.01 0.05
 -10 -7 -2 0.02 0.03
 10 8 -10 1.15 0.16
 -10 8 10 0.93 0.14
 10 -8 -10 0.81 0.16
 -10 8 9 0.13 0.11
 10 8 -9 0.22 0.12
 10 8 -8 1.1 0.16
 -10 8 8 1.03 0.14
 10 -8 -8 1 0.16
 -10 -8 8 0.9 0.13
 -10 8 7 0.54 0.12
 10 8 -7 0.46 0.12
 10 -8 -7 0.45 0.13
 -10 -8 7 0.34 0.11
 -10 8 6 0.06 0.03
 10 8 -6 0.09 0.05
 -10 -8 6 0.22 0.1
 10 -8 -6 0.18 0.11
 10 8 -5 0.18 0.09
 10 -8 -5 0.18 0.12
 10 8 -4 0.87 0.13
 -10 8 4 0.81 0.13
 10 -8 -4 1.12 0.15
 -10 -8 4 1.05 0.14
 10 8 -3 0.01 0.03
 -10 8 3 0 0.02
 -10 -8 3 0.04 0.03
 10 -8 -3 0.03 0.04
 10 8 -2 1.58 0.17
 -10 8 2 1.35 0.16
 -10 -8 2 2.14 0.18
 10 -8 -2 1.29 0.18
 -10 8 1 0.47 0.12
 10 8 -1 0.5 0.11
 10 -8 -1 0.82 0.14
 -10 -8 1 0.6 0.14
 10 8 0 0.59 0.12
 -10 8 0 0.23 0.11
 10 -8 0 0.6 0.14
 -10 -8 0 0.59 0.13
 10 8 1 -0.03 0.04
 -10 8 -1 0 0.02
 10 -8 1 -0.01 0.05
 -10 -8 -1 0.02 0.03
 10 -8 2 0.22 0.15
 -10 -8 -2 0.58 0.14
 -10 9 10 -0.01 0.02
 10 9 -10 0.03 0.05
 10 -9 -10 -0.05 0.05
 -10 9 9 0.51 0.12
 10 9 -9 0.46 0.14
 10 -9 -9 0.46 0.13
 -10 9 8 0.01 0.02
 10 9 -8 0.01 0.04
 10 -9 -8 0.02 0.05
 10 9 -7 1.08 0.14
 -10 9 7 0.91 0.14
 -10 -9 7 1.38 0.15
 10 -9 -7 0.99 0.16
 -10 9 6 0.04 0.03
 10 9 -6 0.05 0.04
 -10 -9 6 0.03 0.03
 10 -9 -6 0.1 0.08
 10 -9 -6 0.15 0.11
 10 9 -5 0.11 0.05
 -10 9 5 0.22 0.11
 10 -9 -5 0.25 0.11
 -10 -9 5 0.18 0.11
 10 -9 -5 0.18 0.08
 -10 9 4 0.01 0.02
 10 9 -4 0.01 0.04
 -10 -9 4 0 0.02
 10 -9 -4 0.02 0.03
 10 -9 -4 0.03 0.04
 -10 9 3 0.28 0.12
 10 9 -3 0.28 0.09
 10 -9 -3 0.25 0.11
 -10 -9 3 0.29 0.11
 10 -9 -3 0.26 0.08
 -10 9 2 0.05 0.03
 10 9 -2 0.13 0.1
 10 -9 -2 0.08 0.05
 10 -9 -2 0.11 0.08
 -10 -9 2 0.26 0.13
 -10 9 1 0.02 0.03
 10 9 -1 0.03 0.04
 10 -9 -1 -0.03 0.03
 -10 -9 1 0.02 0.03
 10 -9 -1 0.01 0.05
 -10 9 0 0.32 0.1
 10 9 0 0.23 0.1
 10 -9 0 0.32 0.14
 -10 -9 0 0.33 0.13
 -10 9 -1 0 0.02
 -10 -9 -1 0.02 0.03
 10 -9 1 0.01 0.05
 10 -9 2 0.28 0.14
 -10 -9 -2 0.23 0.13
 10 10 -9 0.05 0.05
 -10 10 9 0.02 0.03
 10 -10 -9 0.07 0.05
 10 -10 -9 0.24 0.12
 -10 10 8 0.24 0.12
 10 10 -8 0.05 0.05
 10 -10 -8 0 0.05
 10 -10 -8 0.03 0.03
 -10 10 7 0.07 0.03
 10 10 -7 0.23 0.11
 10 -10 -7 0.13 0.06
 10 -10 -7 0.21 0.09
 -10 10 6 0.47 0.12
 10 10 -6 0.23 0.1
 10 -10 -6 0.3 0.13
 10 -10 -6 0.33 0.09
 -10 -10 6 0.37 0.11
 -10 10 5 0 0.02
 10 10 -5 0 0.04
 -10 -10 5 0.01 0.03
 10 -10 -5 -0.03 0.04
 10 -10 -5 0.04 0.03
 10 10 -4 0.57 0.12
 -10 10 4 1.01 0.14
 10 -10 -4 0.65 0.1
 -10 -10 4 0.59 0.13
 10 -10 -4 0.86 0.14
 -10 10 3 0.14 0.11
 10 10 -3 0.15 0.09
 -10 -10 3 0.03 0.03
 10 -10 -3 0.01 0.04
 10 -10 -3 0.02 0.03
 10 10 -2 2.03 0.2
 -10 10 2 2.18 0.2
 -10 -10 2 2.59 0.22
 10 -10 -2 1.98 0.19
 10 -10 -2 2.36 0.22
 -10 10 1 0.47 0.12
 10 10 -1 0.28 0.11
 10 -10 -1 0.49 0.11
 -10 -10 1 0.64 0.13
 10 -10 -1 0.48 0.13
 -10 10 0 1.35 0.16
 -10 -10 0 1.83 0.19
 10 -10 0 1.56 0.19
 10 -10 0 1.23 0.15
 -10 10 -1 0 0.02
 -10 -10 -1 0.02 0.03
 10 -10 1 0.05 0.06
 10 -10 1 -0.01 0.04
 -10 -10 -2 0.28 0.13
 10 11 -9 0.86 0.15
 -10 11 9 0.67 0.13
 10 -11 -9 0.76 0.15
 10 -11 -9 0.67 0.13
 -10 11 8 0.73 0.13
 10 11 -8 0.52 0.12
 10 -11 -8 0.61 0.14
 10 -11 -8 0.46 0.11
 -10 11 7 1.12 0.15
 10 11 -7 0.74 0.13
 10 -11 -7 0.77 0.13
 -10 -11 7 0.9 0.13
 10 -11 -7 0.91 0.15
 -10 11 6 0.01 0.02
 10 11 -6 0.03 0.04
 10 -11 -6 0.06 0.05
 10 -11 -6 -0.01 0.03
 -10 -11 6 -0.01 0.02
 -10 11 5 0.94 0.13
 10 11 -5 0.62 0.11
 10 -11 -5 0.71 0.11
 -10 -11 5 0.58 0.12
 10 -11 -5 0.8 0.14
 -10 11 4 0.6 0.13
 10 11 -4 0.54 0.1
 -10 -11 4 0.42 0.13
 10 -11 -4 0.6 0.13
 10 -11 -4 0.56 0.1
 -10 11 3 2.07 0.19
 10 11 -3 2.09 0.19
 -10 -11 3 1.94 0.2
 10 -11 -3 2.09 0.21
 10 -11 -3 2.06 0.18
 -10 11 2 0.02 0.02
 10 -11 -2 0.12 0.09
 10 -11 -2 0 0.05
 -10 -11 2 -0.01 0.03
 -10 11 1 1.23 0.15
 10 -11 -1 1.12 0.15
 -10 -11 1 1.24 0.17
 10 -11 -1 1.36 0.18
 -10 11 0 0 0.02
 -10 -11 0 0.18 0.12
 10 -11 0 -0.02 0.03
 10 -11 0 -0.06 0.05
 10 -11 1 0.45 0.13
 10 -11 1 0.39 0.16
 -10 -11 -1 0.76 0.14
 10 12 -9 0.04 0.05
 -10 12 9 0.03 0.03
 10 -12 -9 0.05 0.05
 10 -12 -9 0.06 0.04
 10 12 -8 0.13 0.11
 -10 12 8 0.39 0.12
 10 -12 -8 0.38 0.12
 10 -12 -8 0.46 0.11
 10 12 -7 0.06 0.04
 -10 12 7 0.07 0.03
 -10 -12 7 0.04 0.03
 10 -12 -7 0.05 0.05
 10 -12 -7 0.14 0.09
 -10 12 6 0 0.03
 10 12 -6 -0.01 0.03
 -10 -12 6 0.03 0.02
 10 -12 -6 -0.03 0.03
 10 -12 -6 0.01 0.04
 -10 12 5 -0.02 0.02
 10 12 -5 -0.02 0.03
 10 -12 -5 -0.03 0.05
 10 -12 -5 0.03 0.03
 -10 -12 5 0.01 0.03
 -10 -12 4 0.27 0.12
 10 -12 -4 0.04 0.03
 10 -12 -4 0.16 0.12
 -10 12 3 0.04 0.03
 10 -12 -3 0.19 0.1
 10 -12 -3 0.09 0.06
 -10 -12 3 0.31 0.12
 -10 12 2 -0.03 0.02
 10 -12 -2 0 0.03
 -10 -12 2 0 0.03
 10 -12 -2 0.01 0.05
 -10 -12 1 0.41 0.13
 10 -12 -1 0.18 0.14
 10 -12 -1 0.03 0.04
 -10 12 0 0.48 0.12
 -10 -12 0 0.43 0.13
 10 -12 0 0.32 0.12
 10 -12 0 0.63 0.15
 10 -12 1 1.15 0.17
 -10 -12 -1 1.02 0.17
 10 -12 1 1.34 0.19
 -10 13 9 0 0.02
 10 13 -9 0.03 0.05
 10 -13 -9 0.04 0.05
 10 -13 -9 -0.01 0.04
 10 13 -8 0.18 0.11
 -10 13 8 0.15 0.12
 10 -13 -8 0.16 0.1
 10 -13 -8 0.36 0.12
 10 13 -7 0.07 0.05
 -10 13 7 0.2 0.13
 -10 -13 7 0.06 0.03
 10 -13 -7 0.2 0.1
 10 -13 -7 0.11 0.06
 -10 13 6 0.54 0.13
 10 -13 -6 0.3 0.1
 -10 -13 6 0.32 0.11
 10 -13 -6 0.39 0.13
 -10 13 5 1.45 0.16
 -10 -13 5 1.22 0.16
 10 -13 -5 1.32 0.15
 10 -13 -5 1.43 0.18
 10 -13 -4 0.35 0.13
 10 -13 -4 0.32 0.1
 -10 -13 4 0.38 0.12
 -10 13 3 0.76 0.14
 10 -13 -3 0.81 0.13
 -10 -13 3 0.92 0.14
 10 -13 -3 1.01 0.15
 -10 13 2 0.22 0.11
 10 -13 -2 0.48 0.13
 -10 -13 2 0.31 0.13
 10 -13 -2 0.28 0.1
 -10 13 1 1.35 0.17
 -10 -13 1 1.49 0.18
 10 -13 -1 1.42 0.17
 10 -13 -1 1.55 0.19
 -10 13 0 0.21 0.11
 10 -13 0 0.19 0.12
 -10 -13 -1 0.22 0.14
 10 -13 1 0.12 0.07
 10 -13 1 0.29 0.12
 -10 14 8 0.03 0.03
 10 -14 -8 0.01 0.04
 10 -14 -8 0.03 0.05
 -10 14 7 0.04 0.03
 10 -14 -7 0.03 0.05
 10 -14 -7 0 0.04
 -10 -14 7 0 0.02
 -10 14 6 0.55 0.13
 -10 -14 6 0.57 0.12
 10 -14 -6 0.5 0.14
 10 -14 -6 0.57 0.11
 -10 14 5 0.38 0.12
 -10 -14 5 0.26 0.12
 -10 14 4 0.26 0.11
 10 -14 -4 0.21 0.1
 -10 -14 4 0.14 0.12
 10 -14 -4 0.19 0.12
 -10 14 3 0.01 0.03
 10 -14 -3 -0.02 0.05
 -10 -14 3 0.03 0.03
 10 -14 -3 0.02 0.03
 -10 14 2 0.47 0.13
 10 -14 -2 0.28 0.13
 10 -14 -2 0.42 0.11
 -10 -14 2 0.27 0.12
 -10 14 1 0.91 0.15
 -10 -14 1 1.02 0.15
 10 -14 -1 0.8 0.14
 10 -14 -1 1.13 0.17
 10 -14 0 0.3 0.14
 -10 -14 0 0.37 0.15
 10 -14 1 0.18 0.12
 -10 -14 -1 0.03 0.04
 10 -14 1 0.06 0.06
 -10 15 8 0.52 0.12
 10 -15 -8 0.59 0.12
 10 -15 -8 0.35 0.13
 -10 15 7 0.01 0.03
 10 -15 -7 0.04 0.05
 10 -15 -7 0.01 0.04
 -10 15 6 0.17 0.12
 10 -15 -6 0.32 0.11
 10 -15 -6 0.18 0.11
 -10 -15 6 0.36 0.11
 -10 15 5 0.34 0.12
 10 -15 -5 0.29 0.1
 10 -15 -5 0.39 0.12
 -10 -15 5 0.54 0.13
 -10 15 4 0.06 0.03
 10 -15 -4 -0.03 0.04
 -10 -15 4 0 0.03
 10 -15 -4 0.14 0.1
 -10 15 3 1.6 0.17
 10 -15 -3 1.73 0.2
 -10 -15 3 1.55 0.18
 10 -15 -3 1.38 0.16
 -10 15 2 0.5 0.12
 10 -15 -2 0.65 0.14
 -10 -15 2 0.53 0.14
 10 -15 -2 0.35 0.12
 -10 15 1 0.66 0.13
 10 -15 -1 0.52 0.15
 10 -15 -1 0.5 0.13
 -10 -15 1 0.63 0.14
 -10 15 0 0.3 0.12
 10 -15 0 0.55 0.15
 10 -15 0 0.31 0.13
 -10 -15 0 0.36 0.15
 -10 16 8 -0.01 0.03
 10 -16 -8 0.05 0.04
 10 -16 -8 0.08 0.05
 -10 16 7 0.3 0.11
 10 -16 -7 0.4 0.13
 10 -16 -7 0.26 0.12
 -10 16 6 0.04 0.03
 10 -16 -6 0.06 0.05
 -10 -16 6 0.17 0.11
 10 -16 -6 0.05 0.04
 -10 16 5 0.01 0.03
 -10 -16 5 -0.01 0.03
 10 -16 -5 -0.03 0.03
 10 -16 -5 -0.06 0.04
 -10 16 4 0.04 0.03
 -10 -16 4 0.03 0.03
 10 -16 -4 0.01 0.04
 10 -16 -4 0 0.04
 -10 16 3 -0.02 0.02
 10 -16 -3 0.07 0.05
 10 -16 -3 -0.04 0.03
 -10 -16 3 0.02 0.03
 -10 16 2 0.37 0.12
 10 -16 -2 0.19 0.11
 10 -16 -2 0.4 0.13
 -10 16 1 0.22 0.12
 10 -16 -1 0.35 0.12
 -10 -16 1 0.2 0.13
 10 -16 -1 0.23 0.13
 -10 16 0 0.32 0.12
 10 -16 0 0.61 0.14
 10 -16 0 0.2 0.13
 -10 -16 0 0.41 0.15
 -10 17 7 1.3 0.17
 10 -17 -7 1.05 0.16
 10 -17 -7 1.43 0.17
 -10 17 6 0.01 0.03
 10 -17 -6 -0.02 0.04
 -10 -17 6 -0.02 0.03
 10 -17 -6 0 0.04
 -10 17 5 0.35 0.13
 -10 -17 5 0.34 0.12
 10 -17 -5 0.2 0.11
 10 -17 -5 0.31 0.11
 -10 17 4 0.04 0.03
 10 -17 -4 0.11 0.06
 -10 -17 4 0.05 0.03
 10 -17 -4 0.26 0.11
 -10 17 3 0.81 0.15
 10 -17 -3 0.76 0.14
 10 -17 -3 0.94 0.15
 -10 -17 3 0.61 0.14
 -10 17 2 -0.02 0.02
 -10 -17 2 -0.01 0.03
 10 -17 -2 0.05 0.05
 10 -17 -2 -0.01 0.04
 -10 17 1 1.27 0.16
 10 -17 -1 1.13 0.17
 -10 -17 1 1.17 0.18
 10 -17 -1 1.05 0.17
 -10 18 7 -0.05 0.02
 10 -18 -7 0.03 0.05
 10 -18 -7 0.01 0.04
 -10 18 6 0.38 0.13
 10 -18 -6 0.45 0.13
 -10 -18 6 0.45 0.12
 10 -18 -6 0.41 0.12
 -10 18 5 -0.01 0.03
 -10 -18 5 -0.01 0.03
 10 -18 -5 0.05 0.05
 10 -18 -5 0.06 0.04
 -10 18 4 0.01 0.03
 -10 -18 4 0.31 0.13
 10 -18 -4 0.05 0.04
 10 -18 -4 0.09 0.05
 -10 18 3 0.27 0.13
 -10 -18 3 0.41 0.14
 10 -18 -3 0.26 0.13
 10 -18 -3 0.7 0.15
 -10 18 2 -0.01 0.03
 -10 -18 2 0.04 0.03
 10 -18 -2 0.03 0.04
 10 -18 -2 0.03 0.05
 -10 18 1 0.29 0.12
 -10 -18 1 0.24 0.13
 10 -18 -1 0.26 0.13
 10 -18 -1 0.26 0.13
 -10 19 6 0.03 0.03
 -10 -19 6 0.15 0.11
 10 -19 -6 0.1 0.05
 10 -19 -6 0.02 0.04
 -10 19 5 0.26 0.13
 10 -19 -5 0.3 0.13
 10 -19 -5 0.16 0.11
 -10 -19 5 0.17 0.12
 -10 19 4 0 0.03
 10 -19 -4 0.05 0.04
 10 -19 -4 0.05 0.05
 -10 -19 4 0.01 0.03
 -10 19 3 1.03 0.16
 -10 -19 3 1.13 0.16
 10 -19 -3 0.92 0.15
 10 -19 -3 0.83 0.15
 -10 19 2 0.3 0.12
 10 -19 -2 0.3 0.13
 10 -19 -2 0.41 0.14
 -10 20 5 0.9 0.15
 10 -20 -5 1.1 0.16
 10 -20 -5 0.94 0.15
 -10 -20 5 0.94 0.15
 -10 20 4 0.46 0.13
 10 -20 -4 0.38 0.13
 -10 -20 4 0.51 0.14
 10 -20 -4 0.38 0.14
 -10 20 3 0.47 0.14
 -10 -20 3 0.37 0.14
 10 -20 -3 0.54 0.14
 -11 0 9 -0.03 0.02
 11 0 -9 0 0.05
 11 0 -8 -0.06 0.04
 -11 0 8 0.04 0.03
 11 0 -7 0.02 0.05
 -11 0 7 0.01 0.03
 -11 0 6 2.16 0.2
 11 0 -6 2.03 0.21
 -11 0 5 -0.04 0.02
 11 0 -5 0.03 0.05
 -11 0 4 0.27 0.12
 11 0 -4 0.57 0.13
 -11 0 3 -0.03 0.02
 11 0 -3 -0.02 0.04
 -11 0 2 0.4 0.13
 11 0 -2 0.43 0.13
 11 0 -1 0.16 0.11
 11 0 0 -0.01 0.05
 -11 0 0 0.01 0.03
 -11 0 -1 0 0.02
 11 0 1 -0.02 0.05
 11 1 -9 0.76 0.16
 -11 1 9 0.67 0.12
 -11 -1 9 0.58 0.13
 11 -1 -9 0.51 0.14
 -11 1 8 0.35 0.12
 11 1 -8 0.1 0.06
 11 -1 -8 0.37 0.13
 -11 -1 8 0.26 0.11
 11 1 -7 0.25 0.12
 -11 1 7 0.15 0.12
 11 -1 -7 0.15 0.12
 -11 1 6 0.84 0.15
 11 1 -6 1.01 0.15
 -11 -1 6 0.87 0.15
 11 -1 -6 0.82 0.15
 11 1 -5 0.32 0.13
 -11 1 5 0.5 0.12
 11 -1 -5 0.34 0.12
 -11 -1 5 0.2 0.12
 -11 1 4 0.35 0.12
 11 1 -4 0.33 0.12
 11 -1 -4 0.36 0.13
 -11 -1 4 0.21 0.11
 -11 1 3 0.01 0.03
 11 1 -3 0.2 0.11
 -11 -1 3 0.05 0.03
 11 -1 -3 0.06 0.05
 11 1 -2 0 0.04
 -11 1 2 0 0.03
 11 -1 -2 -0.01 0.04
 -11 -1 2 0.02 0.03
 11 1 -1 0.17 0.11
 -11 1 1 0.15 0.12
 11 -1 -1 0.07 0.05
 -11 -1 1 0.29 0.12
 -11 1 0 -0.01 0.03
 11 1 0 0.01 0.05
 11 -1 0 0 0.05
 -11 -1 0 -0.02 0.03
 -11 1 -1 0 0.03
 11 1 1 0.01 0.05
 11 -1 1 -0.02 0.05
 -11 -1 -1 0.01 0.03
 11 2 -9 0.27 0.13
 -11 2 9 0.19 0.11
 -11 -2 9 0.25 0.11
 11 -2 -9 0.17 0.14
 -11 2 8 0.88 0.13
 11 2 -8 0.9 0.15
 11 -2 -8 0.68 0.15
 -11 -2 8 0.68 0.13
 11 2 -7 0.85 0.15
 -11 2 7 0.86 0.15
 11 -2 -7 1.04 0.16
 -11 -2 7 0.88 0.14
 11 2 -6 0.86 0.16
 -11 2 6 0.79 0.15
 -11 -2 6 1.03 0.15
 11 -2 -6 0.97 0.16
 -11 2 5 0.05 0.03
 11 2 -5 0.16 0.11
 -11 -2 5 0.2 0.11
 11 -2 -5 0.2 0.12
 -11 2 4 2.2 0.21
 11 2 -4 2.15 0.21
 -11 -2 4 1.99 0.2
 11 -2 -4 1.71 0.2
 -11 2 3 0.02 0.03
 11 2 -3 0.04 0.05
 11 -2 -3 0.03 0.05
 -11 -2 3 0.02 0.03
 11 2 -2 1.18 0.17
 -11 2 2 1.25 0.15
 -11 -2 2 1.2 0.17
 11 -2 -2 1.01 0.16
 11 2 -1 0.26 0.11
 -11 2 1 0.22 0.11
 11 -2 -1 0.34 0.12
 -11 2 0 0.43 0.12
 11 2 0 0.46 0.13
 -11 -2 0 0.29 0.13
 11 -2 0 0.26 0.13
 -11 2 -1 0.02 0.02
 11 2 1 -0.05 0.04
 11 -2 1 0.17 0.12
 -11 -2 -1 0.01 0.03
 -11 3 9 0.02 0.03
 11 3 -9 0.05 0.06
 -11 -3 9 0.01 0.03
 11 -3 -9 -0.04 0.05
 11 3 -8 0.03 0.05
 -11 3 8 0.01 0.02
 -11 -3 8 0.01 0.03
 11 -3 -8 0.05 0.05
 -11 3 7 0.74 0.13
 11 3 -7 0.83 0.15
 -11 -3 7 0.8 0.14
 11 -3 -7 0.86 0.15
 11 3 -6 0.01 0.04
 -11 3 6 0.05 0.03
 -11 -3 6 0.2 0.12
 11 -3 -6 0.03 0.05
 11 3 -5 0.9 0.15
 -11 3 5 1.04 0.15
 11 -3 -5 1.12 0.16
 -11 -3 5 0.89 0.14
 -11 3 4 0.03 0.03
 11 3 -4 0.23 0.11
 11 -3 -4 0.02 0.05
 -11 -3 4 0.01 0.03
 -11 3 3 1.03 0.15
 11 3 -3 0.74 0.14
 -11 -3 3 0.65 0.15
 11 -3 -3 1.02 0.16
 11 3 -2 0.14 0.11
 -11 3 2 0.03 0.03
 -11 -3 2 0 0.03
 11 -3 -2 -0.01 0.05
 -11 3 1 0.14 0.11
 11 3 -1 0.27 0.12
 -11 -3 1 0.16 0.13
 11 -3 -1 0.25 0.12
 11 3 0 0.04 0.05
 -11 3 0 0.19 0.11
 11 -3 0 0.31 0.14
 -11 3 -1 -0.02 0.02
 11 3 1 -0.06 0.04
 11 -3 1 0.01 0.05
 -11 -3 -1 0.01 0.03
 -11 4 9 0.01 0.02
 11 4 -9 -0.05 0.04
 11 -4 -9 -0.04 0.05
 -11 4 8 0.03 0.03
 11 4 -8 0.04 0.05
 -11 -4 8 -0.01 0.03
 11 -4 -8 -0.01 0.05
 -11 4 7 -0.01 0.02
 11 4 -7 0 0.04
 -11 -4 7 0.01 0.03
 11 -4 -7 -0.01 0.04
 -11 4 6 0 0.03
 11 4 -6 0.03 0.05
 -11 -4 6 -0.03 0.02
 11 -4 -6 0 0.05
 -11 4 5 0.03 0.03
 11 4 -5 -0.01 0.04
 -11 -4 5 0.01 0.03
 11 -4 -5 0.01 0.05
 11 4 -4 0.33 0.11
 -11 4 4 0.5 0.12
 11 -4 -4 0.46 0.14
 -11 -4 4 0.35 0.13
 11 4 -3 0.06 0.05
 -11 4 3 0.03 0.03
 -11 -4 3 0.18 0.12
 11 -4 -3 0.15 0.12
 -11 4 2 0.03 0.03
 11 4 -2 0.11 0.05
 11 -4 -2 0.07 0.05
 -11 -4 2 0.05 0.03
 -11 4 1 0.26 0.12
 11 4 -1 0.26 0.11
 -11 -4 1 0.17 0.12
 11 -4 -1 0.44 0.13
 11 4 0 0.35 0.12
 -11 4 0 0.3 0.11
 11 -4 0 0.37 0.14
 -11 -4 0 0.17 0.13
 11 5 -9 0.4 0.13
 11 -5 -9 0.18 0.13
 11 5 -8 0.02 0.05
 -11 5 8 0.01 0.03
 -11 -5 8 -0.02 0.02
 11 -5 -8 0.17 0.12
 11 5 -7 -0.06 0.04
 -11 5 7 -0.02 0.02
 -11 -5 7 0 0.02
 11 -5 -7 0.04 0.05
 11 5 -6 0.14 0.11
 -11 5 6 0.18 0.11
 -11 -5 6 0.2 0.11
 11 -5 -6 0.18 0.12
 11 5 -5 0.23 0.11
 -11 5 5 0.42 0.13
 11 -5 -5 0.27 0.14
 11 5 -4 0.05 0.05
 -11 5 4 0.02 0.03
 -11 -5 4 -0.01 0.03
 11 -5 -4 -0.01 0.04
 11 5 -3 1.56 0.18
 -11 5 3 1.5 0.17
 -11 -5 3 1.45 0.17
 11 -5 -3 1.03 0.18
 11 5 -2 -0.02 0.04
 -11 5 2 0.01 0.03
 -11 -5 2 -0.02 0.03
 11 -5 -2 0.07 0.05
 -11 5 1 0.47 0.12
 11 5 -1 0.24 0.12
 11 -5 -1 0.27 0.13
 -11 -5 1 0.31 0.13
 11 5 0 0.01 0.05
 -11 5 0 0 0.02
 11 -5 0 0.02 0.05
 -11 -5 0 0.03 0.03
 11 6 -9 0.27 0.13
 -11 6 9 0.15 0.1
 11 -6 -9 0.25 0.13
 -11 6 8 0.04 0.03
 11 6 -8 0.04 0.05
 11 -6 -8 0.05 0.06
 -11 -6 8 0.01 0.03
 -11 6 7 0.04 0.03
 11 6 -7 0.16 0.12
 -11 -6 7 0.15 0.1
 11 -6 -7 0.17 0.12
 -11 6 6 0.62 0.13
 11 6 -6 0.4 0.13
 11 -6 -6 0.69 0.15
 -11 -6 6 0.59 0.14
 -11 6 5 0.03 0.03
 11 6 -5 0.18 0.11
 -11 -6 5 0.02 0.03
 11 -6 -5 0 0.05
 11 6 -4 0.01 0.04
 -11 6 4 0.04 0.03
 11 -6 -4 0.15 0.11
 -11 -6 4 0.04 0.03
 11 6 -3 0.22 0.11
 -11 6 3 0.16 0.11
 -11 -6 3 0.22 0.12
 11 -6 -3 0.26 0.14
 11 6 -2 0.19 0.1
 -11 6 2 0.04 0.03
 11 -6 -2 0.1 0.06
 -11 -6 2 -0.02 0.03
 -11 6 1 0.02 0.03
 11 6 -1 0.16 0.11
 -11 -6 1 -0.01 0.03
 11 -6 -1 0.02 0.05
 11 6 0 0.04 0.05
 -11 6 0 0.02 0.02
 11 -6 0 0.04 0.06
 -11 -6 0 -0.02 0.03
 -11 7 9 0.04 0.03
 11 7 -9 0.06 0.05
 11 -7 -9 0.17 0.13
 -11 7 8 -0.01 0.02
 11 7 -8 -0.02 0.05
 11 -7 -8 0.01 0.06
 -11 -7 8 0.14 0.11
 -11 7 7 0.6 0.14
 11 7 -7 0.61 0.14
 -11 -7 7 0.58 0.13
 11 -7 -7 0.65 0.15
 11 7 -6 0.11 0.05
 -11 7 6 0.41 0.11
 -11 -7 6 0.25 0.12
 11 -7 -6 0.36 0.13
 11 7 -5 0.5 0.12
 -11 7 5 0.49 0.13
 -11 -7 5 0.52 0.13
 11 -7 -5 0.55 0.14
 11 7 -4 0 0.04
 -11 7 4 0.01 0.03
 -11 -7 4 -0.02 0.03
 11 -7 -4 0.26 0.13
 -11 7 3 0.29 0.12
 11 7 -3 0.28 0.12
 -11 -7 3 0.28 0.12
 11 -7 -3 0.29 0.14
 11 7 -2 0.02 0.04
 -11 7 2 0.01 0.03
 -11 -7 2 0 0.03
 11 -7 -2 0.01 0.05
 11 7 -1 0.38 0.12
 -11 7 1 0.74 0.13
 -11 -7 1 0.28 0.13
 11 -7 -1 0.87 0.16
 11 7 0 -0.05 0.04
 -11 7 0 -0.01 0.02
 11 -7 0 0.04 0.06
 -11 -7 0 -0.01 0.03
 11 8 -8 0.03 0.05
 -11 8 8 0.23 0.11
 11 -8 -8 0.16 0.13
 -11 8 7 0.29 0.12
 11 8 -7 0.27 0.11
 -11 -8 7 0.02 0.03
 11 -8 -7 0.12 0.06
 -11 8 6 0.01 0.03
 11 8 -6 0.01 0.04
 -11 -8 6 -0.03 0.03
 11 -8 -6 -0.01 0.05
 -11 8 5 0.47 0.13
 11 8 -5 0.25 0.12
 11 -8 -5 0.42 0.13
 -11 -8 5 0.44 0.13
 11 8 -4 0.14 0.11
 -11 8 4 0.24 0.11
 -11 -8 4 0.21 0.13
 11 -8 -4 0.42 0.14
 11 8 -3 0.27 0.12
 -11 8 3 0.46 0.13
 11 -8 -3 0.45 0.14
 -11 -8 3 0.27 0.14
 11 8 -2 -0.01 0.04
 -11 8 2 0.01 0.03
 -11 -8 2 0.01 0.03
 11 -8 -2 -0.05 0.05
 -11 8 1 0.19 0.1
 11 8 -1 0.27 0.12
 -11 -8 1 0.18 0.14
 11 -8 -1 0.19 0.14
 -11 8 0 -0.03 0.02
 -11 -8 0 -0.02 0.03
 11 -8 0 0.08 0.06
 11 9 -8 0.95 0.15
 -11 9 8 0.77 0.14
 11 -9 -8 0.76 0.16
 -11 -9 8 0.77 0.14
 -11 9 7 0.51 0.13
 11 9 -7 0.35 0.12
 -11 -9 7 0.22 0.12
 11 -9 -7 0.58 0.15
 -11 9 6 0.55 0.14
 11 9 -6 0.44 0.12
 -11 -9 6 0.23 0.12
 11 -9 -6 0.4 0.14
 11 9 -5 1.18 0.16
 -11 9 5 1.73 0.17
 -11 -9 5 1.47 0.18
 11 -9 -5 1.45 0.19
 11 9 -4 0.08 0.05
 -11 9 4 0.2 0.11
 11 -9 -4 0.08 0.06
 -11 -9 4 0.03 0.03
 11 9 -3 0.49 0.13
 -11 9 3 0.61 0.14
 11 -9 -3 0.74 0.15
 -11 -9 3 0.56 0.14
 11 9 -2 0.03 0.04
 -11 9 2 0.24 0.12
 11 -9 -2 0.2 0.13
 -11 9 1 0.02 0.03
 -11 -9 1 0 0.03
 11 -9 -1 0.06 0.06
 -11 9 0 0.01 0.03
 -11 -9 0 0.02 0.04
 11 -9 0 0.01 0.06
 11 10 -8 0.02 0.05
 -11 10 8 0 0.03
 11 -10 -8 0.29 0.13
 -11 10 7 0.29 0.12
 11 10 -7 0.41 0.11
 11 -10 -7 0.46 0.14
 -11 -10 7 0.58 0.13
 11 10 -6 0.03 0.04
 11 -10 -6 0.15 0.12
 -11 -10 6 0.22 0.12
 -11 10 5 0.02 0.03
 11 10 -5 0.04 0.04
 -11 -10 5 -0.01 0.03
 11 -10 -5 0.04 0.05
 11 10 -4 0 0.04
 -11 10 4 0.18 0.12
 11 -10 -4 0.03 0.05
 -11 -10 4 0.02 0.03
 -11 10 3 0.77 0.14
 11 10 -3 0.45 0.13
 11 -10 -3 0.46 0.15
 -11 -10 3 0.53 0.15
 -11 10 2 0.02 0.03
 11 -10 -2 0.02 0.05
 -11 -10 2 -0.04 0.03
 -11 10 1 0.22 0.12
 11 -10 -1 0.03 0.06
 -11 -10 1 0 0.03
 11 11 -8 0.01 0.04
 -11 11 8 -0.02 0.03
 11 -11 -8 0.01 0.05
 11 11 -7 1 0.15
 -11 11 7 1.08 0.16
 11 -11 -7 1 0.17
 -11 -11 7 1.24 0.16
 11 11 -6 0 0.04
 -11 11 6 0.01 0.03
 -11 -11 6 0.05 0.03
 11 -11 -6 0 0.05
 -11 11 5 1.08 0.16
 11 11 -5 0.71 0.13
 -11 -11 5 0.75 0.15
 11 -11 -5 0.95 0.17
 -11 11 4 1.4 0.18
 -11 -11 4 1.08 0.16
 11 -11 -4 1.09 0.18
 -11 11 3 2.86 0.24
 -11 -11 3 2.09 0.23
 11 -11 -3 2.78 0.26
 -11 11 2 0.62 0.14
 11 -11 -2 0.64 0.16
 -11 -11 2 0.63 0.15
 -11 11 1 1.31 0.16
 -11 -11 1 0.87 0.16
 11 -11 -1 1.32 0.19
 -11 12 7 0.19 0.13
 11 12 -7 0.02 0.04
 -11 -12 7 0.02 0.03
 11 -12 -7 0.04 0.05
 -11 12 6 0.58 0.13
 -11 -12 6 0.61 0.14
 11 -12 -6 0.48 0.15
 -11 12 5 0.18 0.13
 -11 -12 5 -0.02 0.03
 11 -12 -5 0.03 0.05
 -11 12 4 2.35 0.22
 -11 -12 4 1.97 0.21
 11 -12 -4 2.22 0.24
 -11 12 3 1.23 0.17
 11 -12 -3 0.62 0.17
 -11 -12 3 0.9 0.17
 -11 12 2 0.35 0.13
 11 -12 -2 0.41 0.15
 -11 12 1 0.3 0.12
 11 -12 -1 0.04 0.06
 -11 -12 1 0.28 0.15
 -11 13 7 0.02 0.03
 -11 -13 7 -0.01 0.03
 11 -13 -7 0 0.05
 -11 13 6 0.01 0.03
 11 -13 -6 0.03 0.05
 -11 -13 6 -0.01 0.03
 -11 13 5 -0.06 0.02
 11 -13 -5 -0.01 0.05
 -11 -13 5 0.01 0.03
 -11 13 4 0.03 0.03
 -11 -13 4 -0.03 0.03
 11 -13 -4 0 0.05
 -11 13 3 0.2 0.13
 11 -13 -3 0.08 0.06
 -11 -13 3 -0.01 0.03
 -11 13 2 0.01 0.03
 11 -13 -2 0.05 0.06
 -11 -13 2 -0.01 0.03
 -11 14 6 0.06 0.03
 11 -14 -6 0.05 0.05
 11 -14 -6 0.16 0.1
 -11 -14 6 0.16 0.12
 -11 14 5 0.54 0.14
 11 -14 -5 0.57 0.14
 -11 -14 5 0.54 0.13
 11 -14 -5 0.37 0.11
 -11 14 4 0.05 0.03
 11 -14 -4 -0.02 0.05
 11 -14 -4 0.18 0.11
 -11 -14 4 0.04 0.04
 -11 14 3 0 0.03
 -11 -14 3 0.18 0.14
 11 -14 -3 0.05 0.04
 11 -14 -3 0.05 0.06
 -11 14 2 0.67 0.13
 11 -14 -2 0.71 0.16
 -11 -14 2 0.49 0.16
 11 -14 -2 0.6 0.14
 -11 15 6 -0.01 0.03
 11 -15 -6 0.04 0.04
 11 -15 -6 0.07 0.05
 -11 -15 6 0.01 0.03
 -11 15 5 0.17 0.13
 -11 -15 5 0.17 0.12
 11 -15 -5 0.34 0.13
 11 -15 -5 0.12 0.05
 -11 15 4 0.77 0.15
 11 -15 -4 0.66 0.15
 -11 -15 4 0.64 0.16
 11 -15 -4 0.53 0.13
 -11 15 3 -0.02 0.03
 11 -15 -3 0.01 0.04
 -11 -15 3 0.24 0.14
 11 -15 -3 0.03 0.05
 -11 16 4 0.78 0.14
 11 -16 -4 0.63 0.14
 -11 -16 4 0.73 0.15
 11 -16 -4 0.78 0.16
 12 0 -7 -0.02 0.05
 -12 0 7 -0.03 0.03
 12 0 -6 0.19 0.12
 -12 0 6 0.05 0.03
 -12 0 5 -0.02 0.03
 12 0 -5 0.02 0.05
 12 0 -4 -0.05 0.04
 -12 0 4 -0.05 0.03
 -12 0 3 0.01 0.03
 12 0 -3 -0.03 0.05
 -12 0 2 0.62 0.14
 12 0 -2 0.69 0.14
 -12 1 7 0.01 0.03
 12 1 -7 -0.04 0.05
 12 -1 -7 -0.02 0.05
 -12 -1 7 -0.02 0.03
 -12 1 6 0.03 0.03
 12 1 -6 0.05 0.05
 -12 -1 6 0.06 0.03
 12 -1 -6 0.08 0.05
 -12 1 5 0 0.03
 12 1 -5 0.03 0.05
 12 -1 -5 0.01 0.04
 -12 -1 5 0.02 0.03
 -12 1 4 0 0.03
 12 1 -4 0.03 0.05
 12 -1 -4 0.01 0.05
 -12 -1 4 -0.02 0.03
 -12 1 3 0.17 0.13
 12 1 -3 0.09 0.06
 -12 -1 3 0.01 0.03
 12 -1 -3 0.08 0.06
 12 1 -2 -0.04 0.04
 -12 1 2 0.14 0.12
 12 -1 -2 0.04 0.05
 -12 -1 2 0.01 0.03
 -12 2 7 -0.04 0.03
 12 2 -7 0.02 0.05
 12 -2 -7 -0.04 0.05
 -12 -2 7 -0.02 0.03
 -12 2 6 0 0.03
 12 2 -6 0.05 0.05
 -12 -2 6 -0.01 0.03
 12 -2 -6 0.07 0.06
 -12 2 5 0.16 0.12
 12 2 -5 0.31 0.13
 12 -2 -5 0.33 0.12
 12 2 -4 1.08 0.16
 -12 2 4 1.04 0.16
 -12 -2 4 1.01 0.15
 12 -2 -4 0.89 0.16
 12 2 -3 -0.04 0.05
 -12 2 3 0 0.03
 12 -2 -3 0 0.05
 -12 -2 3 -0.01 0.03
 -12 2 2 0.26 0.13
 12 2 -2 0.34 0.12
 -12 -2 2 0.37 0.13
 12 -2 -2 0.32 0.14
 -12 3 7 0.18 0.12
 12 3 -7 0.25 0.12
 -12 -3 7 0.06 0.03
 12 -3 -7 0.17 0.14
 -12 3 6 -0.02 0.03
 12 3 -6 0.02 0.05
 12 -3 -6 0.03 0.05
 -12 -3 6 -0.01 0.03
 12 3 -5 0.01 0.04
 -12 3 5 -0.02 0.03
 12 -3 -5 0.01 0.05
 -12 -3 5 -0.01 0.03
 -12 3 4 0 0.03
 12 3 -4 0.02 0.05
 -12 -3 4 0 0.03
 12 -3 -4 0.02 0.05
 -12 3 3 0.14 0.12
 12 3 -3 0.06 0.05
 -12 -3 3 0.03 0.03
 12 -3 -3 0.03 0.06
 12 3 -2 0.03 0.05
 -12 3 2 0.03 0.03
 -12 -3 2 -0.02 0.03
 12 -3 -2 -0.01 0.04
 -12 4 7 0.16 0.12
 12 4 -7 0.03 0.05
 -12 -4 7 0.05 0.03
 12 -4 -7 -0.06 0.05
 12 4 -6 0.43 0.13
 -12 4 6 0.4 0.12
 12 -4 -6 0.58 0.15
 -12 -4 6 0.36 0.14
 12 4 -5 0 0.04
 -12 4 5 -0.02 0.02
 -12 -4 5 -0.03 0.02
 12 -4 -5 -0.01 0.04
 -12 4 4 0.86 0.16
 12 4 -4 1.11 0.16
 12 -4 -4 0.86 0.17
 -12 -4 4 1.14 0.17
 -12 4 3 0.02 0.03
 12 4 -3 0.02 0.05
 -12 -4 3 -0.03 0.03
 12 -4 -3 -0.06 0.05
 12 4 -2 0.33 0.12
 -12 4 2 0.18 0.12
 12 -4 -2 0.34 0.13
 12 5 -7 0 0.05
 -12 5 7 0.02 0.03
 -12 -5 7 -0.02 0.03
 12 -5 -7 0.03 0.06
 12 5 -6 0.25 0.13
 -12 5 6 0.03 0.03
 -12 -5 6 -0.01 0.03
[truncated: 1,169 more chars]
